# Supplementary material for: The kinase Bud32 regulates iron homeostasis in fungal pathogen Cryptococcus neoformans
Source: Front Immunol. 2025 Jul 25;16:1624237. doi: 10.3389/fimmu.2025.1624237 (PMC12332752; doi:10.3389/fimmu.2025.1624237)
Supplement: Supplementary Table 2 — Differentially expressed proteins of iron transport/iron-sulfur cluster transporter/iron-sulfur cluster (ISC) assembly/ISC-containing proteins in bud32Δ mutant. Significant differences were observed when comparing the bud32Δ mutant to the WT control, with fold changes exceeding 1.5 or falling below 0.67, accompanied by a p-value of less than 0.05. [file Table2.xlsx]

## Sheet: Diff_distribution
group	total	down	up
WT vs bud32Δ	1176	480	696

## Sheet: WT vs bud32Δ
Mode	Index	Compounds	Class I	Class II	Formula	Q1 (Da)	Molecular weight (Da)	RT (min)	Adduct	Mass error	Level	score	LC mode	CAS	PubChem	HMDB	Metlin	cpd_ID	W1	W2	W3	B1	B2	B3	QC01	QC02	QC03	kegg_map	bud32-mutant_vs_WT_VIP	bud32-mutant_vs_WT_P-value	bud32-mutant_vs_WT_Fold_Change	bud32-mutant_vs_WT_Log2FC	bud32-mutant_vs_WT_Type
T3_positive	MEDP1592	Citicoline	Nucleotide and Its metabolites	Nucleotide and Its metabolites	C14H26N4O11P2	489.115	488.107	0.7924	[M+H]+	1.59882	2	0.9153	rp	987-78-0	13804	HMDB0001413	3581	C00307	143486	155912	125752	5459.47	23286.8	29169.5	60279.1	60228.2	58958.7	ko00564,ko01100	1.18567	0.000506529	0.136224	-2.87594	down
T3_positive	MW0053463	Ganolucidic acid A	Organic acid and Its derivatives	Organic acid and Its derivatives	C30H44O6	483.308	500.314	8.1732	[M+H-H2O]+	5.98433	3	0.7038	rp	98665-21-5	20055993	HMDB0035302	-	-	90490.1	64998.6	55533.9	33530.6	35565.6	14405.7	35663.9	35835.4	37000.3	-	1.09592	0.0341659	0.395701	-1.33752	down
T3_positive	MW0013303	24-Hydroxyglabrolide	Aldehyde,Ketones,Esters	Esters	C30H44O5	449.317	484.319	6.8882	[M+H-2H2O]+	19.5888	3	0.652	rp	98063-18-4	131751691	HMDB0035256	-	-	66754.5	83774	55052.3	6563.33	16108.6	10870.3	8675.88	11403.2	10559.5	-	1.25643	0.0134831	0.163159	-2.61565	down
T3_positive	MW0154557	N-Butyl-11-[(7R,8R,9S,13S,14S,17S)-3,17-dihydroxy-13-methyl-7,8,9,11,12,13,14,15,16,17-decahydro-6H-cyclopenta[A]phenanthren-7-YL]-N-methylundecanamide	Hormones and hormone related compounds	Hormones and hormone related compounds	C34H55NO3	526.432	525.418	7.9829	[M+H]+	8.96259	3	0.6043	rp	98007-99-9	104772	-	-	-	275445	250279	255518	189063	155269	178006	198384	196869	197216	-	1.2464	0.00294836	0.6686	-0.580784	down
T3_positive	MEDN0068	S-(5-Adenosy)-L-Homocysteine	Nucleotide and Its metabolites	Nucleotide and Its metabolites	C14H20N6O5S	385.129	384.122	1.5194	[M+H]+	2.19694	1a	0.9807	rp	979-92-0	439155	HMDB0000939	296	C00021	456862	459398	365315	705452	724583	643676	470802	470051	470154	ko00270,ko01100,ko01230,ko01240	1.23973	0.00311352	1.6181	0.694297	up
T3_positive	MW0108066	Lys-Met	Amino acid and Its metabolites	Small Peptide	C11H23N3O3S	277.139	277.146	0.7807	[M+]+	13.5577	3	0.6625	rp	97729-52-7	7016114	HMDB0028957	23764	-	1.42638e+06	1.42022e+06	1.43685e+06	615618	582446	745199	953865	953652	961199	-	1.28844	0.00375278	0.453668	-1.14029	down
T3_positive	MW0142582	2-thio PAF	Organic acid and Its derivatives	Phosphoric acids	C26H55NO6PS+	539.349	540.349	8.3521	[M+]+	12.0022	3	0.7146	rp	96801-55-7	14236443	-	63005	-	1774.3	2896.14	3677.34	7570.81	13849.5	11142.1	6550.63	6612.11	6637.17	-	1.21449	0.0377968	3.90072	1.96374	up
T3_positive	MW0009611	Pyridaben	Benzene and substituted derivatives	Benzene and substituted derivatives	C19H25ClN2OS	365.136	364.138	7.1198	[M+H]+	20.9725	3	0.8693	rp	96489-71-3	91754	-	72412	C18614	193580	187155	166437	147342	123257	137031	160946	161638	159613	-	1.18502	0.0131069	0.744979	-0.424729	down
T3_positive	MW0103352	2'-Deoxyuridine 5'-monophosphate	Nucleotide and Its metabolites	Nucleotide and Its metabolites	C9H13N2O8P	347.004	308.041	0.5556	[M+K]+	2.7318	3	0.7118	rp	964-26-1	65063	HMDB0001409	6225	C00365	68.85	202.2	226.79	857.39	762.76	1315.81	533.43	388.21	499.2	ko00240,ko01100,ko01232	1.20052	0.0332591	5.8974	2.56008	up
T3_positive	MW0063564	C24:1 Sphingomyelin	SP	SM	C47H93N2O6P	835.666	812.677	6.9476	[M+Na]+	2.08001	2	0.9621	rp	94359-13-4	44260126	HMDB0012107	-	C00550	171919	173561	133018	19709.3	28206.4	17903.7	33007.8	36445.7	37260.5	ko00600,ko01100	1.29618	0.00663969	0.137554	-2.86193	down
T3_positive	MW0055261	C22 Sphingomyelin	SP	SM	C45H91N2O6P	809.651	786.662	6.9476	[M+Na]+	1.10298	2	0.9341	rp	94359-12-3	44260125	HMDB0012103	-	-	149071	173354	110887	13208.7	32214.5	11917.2	20712.4	18352.1	19526.6	-	1.25116	0.0125312	0.13233	-2.91778	down
T3_positive	MW0107880	L-Homophenylalanine	Amino acid and Its metabolites	Amino acids	C10H13NO2	144.08	179.095	2.5341	[M+H-2H2O]+	1.22211	2	0.803	rp	943-73-7	2724505	-	43203	C17235	1919.88	1982.71	590.64	8749.83	8132.39	8792.98	4475.52	4463.96	4445.56	ko00400,ko01100,ko01110,ko01210	1.20748	0.00102474	5.7142	2.51455	up
T3_positive	MW0151707	Iminoacetic acid	Organic acid and Its derivatives	Organic acid and Its derivatives	C2H3NO2	111.984	73.0164	8.9199	[M+K]+	10.3	3	0.7881	rp	939742	3080609	-	-	-	588567	550494	577386	504760	501441	493907	523143	521902	519628	-	1.25296	0.0175992	0.873961	-0.194359	down
T3_positive	MW0121554	2H-Thieno(2,3-e)-1,2-thiazine-3-carboxamide, 4-hydroxy-N-(5-hydroxy-2-pyridinyl)-2-methyl-, 1,1-dioxide	Benzene and substituted derivatives	Benzene and substituted derivatives	C13H11N3O5S2	371.04	353.014	2.7449	[M+NH4]+	20.607	3	0.5165	rp	93739-45-8	54692969	HMDB0014098	-	-	794.65	1375.96	2259.9	4930.59	6155.27	4565.03	3050.72	3040.4	3050.55	-	1.18676	0.00453255	3.53253	1.8207	up
T3_positive	MW0112000	2'',6''-Digalloyliriflophenone 3-C-glucoside	Aldehyde,Ketones,Esters	Esters	C33H28O18	712.134	712.128	2.7428	[M+]+	15.0358	3	0.5894	rp	92631-87-3	131750890	HMDB0029629	-	-	824.62	684.59	445.04	3850.96	3222.99	2984.31	1848.36	1849.38	1833.55	-	1.27683	0.00359646	5.14686	2.36369	up
T3_positive	MW0107001	Gln-Phe	Amino acid and Its metabolites	Small Peptide	C14H19N3O4	294.155	293.138	1.5194	[M+H]+	23.951	3	0.5028	rp	92327-75-8	57288566	HMDB0028804	-	-	5935.7	6576.73	5317.13	11107	9195.97	7958.3	5641.2	5613.88	5821.35	-	1.17288	0.0479737	1.58508	0.664558	up
T3_positive	MW0006232	Benzidine	Benzene and substituted derivatives	Benzene and substituted derivatives	C12H12N2	185.115	184.1	7.6714	[M+H]+	19.1639	3	0.7713	rp	92-87-5	7111	HMDB0041835	-	C16444	3.11172e+06	3.2479e+06	3.23371e+06	1.77662e+06	1.90708e+06	1.85209e+06	2.1899e+06	2.2151e+06	2.23077e+06	-	1.3075	2.22776e-05	0.577045	-0.793244	down
T3_positive	MW0054942	methylcarbamyl PAF	GP	PC	C26H55N2O7P	577.335	538.375	7.7701	[M+K]+	4.51263	3	0.7526	rp	91575-58-5	124663	-	43418	C00157	82977.6	90205.6	66555.6	52050.9	51892.2	44642.6	38541.6	38250.4	38521	ko00564,ko00590,ko00592,ko01100,ko01110	1.20211	0.0374457	0.619781	-0.690169	down
T3_positive	MW0126516	Sarafloxacin hydrochloride	Benzene and substituted derivatives	Benzene and substituted derivatives	C20H18ClF2N3O3	368.12	421.101	2.4364	[M+H-H2O]+	0.353073	3	0.5897	rp	91296-87-6	56207	-	-	-	1878.77	2160.14	1420.88	4900.96	4366.98	4629.47	2923.51	2908.74	2880.4	-	1.26756	0.000737816	2.54541	1.3479	up
T3_positive	MW0157008	Ser-Ile	Amino acid and Its metabolites	Small Peptide	C9H18N2O4	219.134	218.127	1.7688	[M+H]+	0.65	3	0.7228	rp	91086-51-0	71429009	HMDB0029042	-	-	3338.84	3798.35	1524.39	16370.8	13924	14411.5	8181.17	8213.86	8202.88	-	1.24325	0.000306826	5.16145	2.36778	up
T3_positive	MW0169625	Palmitoleoyl 3-carbacyclic Phosphatidic Acid	FA	Others	C20H37O5P	371.227	388.238	7.1209	[M+H-H2O]+	17.5604	3	0.6096	rp	910228-13-6	9909601	-	44868	-	13361.3	10762.5	9487.95	5453.18	2464.45	3616.46	7800.04	8122.3	7678.27	-	1.19307	0.00816823	0.343157	-1.54306	down
T3_positive	MW0000921	[2-(Dimethoxymethyl)-1-heptenyl]benzene	Benzene and substituted derivatives	Benzene and substituted derivatives	C16H24O2	249.185	248.178	7.0853	[M+H]+	1.31751	3	0.7886	rp	91-87-2	6378927	HMDB0036221	-	-	46650.5	46735.6	39379.8	29946.5	31062.8	30019.2	36449.5	36692.7	36443.2	-	1.25399	0.0271915	0.685632	-0.544494	down
T3_positive	MEDP1315	Quinoline	Heterocyclic compounds	Heterocyclic compounds	C9H7N	130.064	129.058	2.5341	[M+H]+	2.93473	2	0.8986	rp	91-22-5	7047	HMDB0033731	-	C06413	1287.07	1259.98	1731.66	3505.4	3674.16	4092.81	3832.57	3705.53	3619.04	-	1.27886	0.000602393	2.63453	1.39754	up
T3_positive	MW0147401	Chlorimuron-ethyl	Heterocyclic compounds	Heterocyclic compounds	C15H15ClN4O6S	415.037	414.04	7.5676	[M+H]+	23.94	3	0.6381	rp	90982-32-4	56160	-	-	-	875.56	697.43	1210.26	342.84	562.19	263.79	2795.42	2990.78	3055.57	-	1.12242	0.0486817	0.419948	-1.25172	down
T3_positive	MW0053769	Goshonoside F2	Benzene and substituted derivatives	Benzene and substituted derivatives	C26H44O8	449.288	484.304	7.1888	[M+H-2H2O]+	2.48425	3	0.7314	rp	90851-25-5	13855763	HMDB0038540	-	-	15206.7	16971.2	18018.8	4905.09	9029.94	7444.66	10267.3	9923.47	10089.9	-	1.21123	0.0041768	0.425919	-1.23135	down
T3_positive	MW0110590	1,2-bis(Heptanoylthio)glycerophosphocholine	Organic acid and Its derivatives	Phosphoric acids	C22H44NO6PS2	536.239	513.235	2.7538	[M+Na]+	24.7062	3	0.5911	rp	89019-63-6	57369907	-	63009	-	68.74	232.66	112.66	2420.15	1441.29	2015.83	920.46	871.5	880.88	-	1.26467	0.0209001	14.1942	3.82723	up
T3_positive	MW0006476	JP83	Benzene and substituted derivatives	Benzene and substituted derivatives	C26H28N2O3	417.211	416.21	1.3637	[M+H]+	21.111	3	0.7732	rp	887264-44-0	35027739	-	-	-	304.06	210.59	505.83	5454.64	3448.29	3738.35	2128.56	2301.76	2330.4	-	1.28034	0.0233557	12.3876	3.63082	up
T3_positive	FDATP01930	Cholini bitartras	Others	Medicine	C9H19NO7	276.102	253.116	1.3977	[M+Na]+	10.2509	3	0.637	rp	87-67-2	10198924	HMDB0040269	-	-	2173.99	2337.66	2077.95	8334.17	7982.7	7779.48	4104.33	4102.44	4058.3	-	1.30969	9.69531e-05	3.65672	1.87055	up
T3_positive	MW0122107	6-Chloropurine	Heterocyclic compounds	Heterocyclic compounds	C5H3ClN4	137.002	154.005	1.2099	[M+H-H2O]+	0.735008	3	0.6531	rp	87-42-3 | 111055-92-6 | 133762-83-1	5359277	HMDB0012245	-	-	55040.3	48405.6	49249.5	57391.8	62730.3	65801.9	60726.3	61294	61601	-	1.13566	0.027475	1.21761	0.284056	up
T3_positive	MW0107141	Glycyl-L-leucine	Amino acid and Its metabolites	Amino acid derivatives	C8H16N2O3	189.123	188.116	1.929	[M+H]+	0.725	3	0.8935	rp	869-19-2	92843	HMDB0000759	5727	C02155	873.98	543.23	941.27	3735.68	3129.06	3447.02	1870.24	1882.33	1851.39	-	1.27668	0.000451759	4.37221	2.12836	up
T3_positive	MW0147221	Carumonam sodium	Others	Medicine	C12H12N6Na2O10S2	510.988	509.985	0.643	[M+H]+	24.242	3	0.5079	rp	86832-68-0	9568618	-	-	-	30190.1	24917	22690.2	74470.4	64520.9	69751.6	40576.2	40249.4	40239.1	-	1.29005	0.000387452	2.68317	1.42394	up
T3_positive	MW0106005	Benazepril	Amino acid and Its metabolites	Amino acid derivatives	C24H28N2O5	425.201	424.2	3.7779	[M+H]+	19.5237	2	0.8166	rp	86541-75-5	5362124	HMDB0014682	-	C06843	3926.75	5072.53	2612.91	8723.99	8922.96	7478.8	5540.06	5619.21	5500.3	-	1.17312	0.00928154	2.16374	1.11353	up
T3_positive	MW0106855	Gln-Ile	Amino acid and Its metabolites	Small Peptide	C11H21N3O4	260.16	259.153	1.8502	[M+H]+	1.98445	3	0.7872	rp	86416-45-7	57315376	HMDB0028800	-	-	721.75	1213.04	422.25	4233.47	3356.12	3692.87	1755.4	1718.98	1758.25	-	1.228	0.00103193	4.78671	2.25903	up
T3_positive	FDATN00910	Ciloxan	Others	Medicine	C17H21ClFN3O4	332.134	385.12	2.3228	[M+H]+	16.2159	3	0.6851	rp	86393-32-0 | 128074-72-6	62998	-	-	-	10835.9	12206.7	11362.2	5283.81	3833.58	3895.01	6251.82	6098.67	6258.55	-	1.27909	0.000379362	0.378215	-1.40272	down
T3_positive	MW0012936	1-Oleoyl-2-acetyl-sn-glycerol	GL	DG	C23H42O5	399.308	398.303	8.0176	[M+H]+	3.82416	3	0.8874	rp	86390-77-4 | 92282-11-6	6437055	-	424	C00641	540423	512319	531682	466846	489754	462439	470253	466979	468648	ko00561,ko00562,ko00564,ko01100,ko01110,ko04070	1.20779	0.00968028	0.895618	-0.159044	down
T3_positive	MW0148967	Cyano(6-methoxy-naphthalen-2-yl)methyl trans-[(3-phenyloxiran-2-yl)methyl] carbonate	Benzene and substituted derivatives	Benzene and substituted derivatives	C23H19NO5	412.116	389.126	5.0775	[M+Na]+	0.352844	3	0.7365	rp	863223-43-2	25093347	-	64657	-	6901.14	7383.53	6441.41	5991.01	6085.03	5531.56	5368.22	5357.16	5293.84	-	1.12366	0.0407387	0.849538	-0.235249	down
T3_positive	MW0001661	1-Naphthoic acid	Benzene and substituted derivatives	Benzene and substituted derivatives	C11H8O2	173.065	172.052	0.5666	[M+H]+	14.6729	3	0.6984	rp	86-55-5 | 1320-04-3	6847	-	2759	-	1675.07	1756.22	910.69	4493.71	3273.63	4086.69	2581.84	2572.84	2492.25	-	1.19976	0.00628407	2.7301	1.44895	up
T3_positive	MW0155541	Vitamin K1 2,3-epoxide	CoEnzyme and vitamins	CoEnzyme and vitamins	C31H46O3	467.35	466.345	8.1385	[M+H]+	5.03286	3	0.8476	rp	85955-78-8	5280845	HMDB0002972	3030	C05849	460.19	742.12	728.87	4971.38	6186.88	5140.15	2681.9	2838.19	2828.21	ko00130,ko01100,ko01110,ko01240	1.29528	0.0043166	8.43961	3.07718	up
T3_positive	MW0122344	7alpha-1(10->19)-Abeo-7-acetoxyobacun-9(11)-ene	Heterocyclic compounds	Heterocyclic compounds	C28H32O8	519.197	496.21	6.5587	[M+Na]+	2.96723	3	0.6664	rp	85643-97-6	131751902	HMDB0036033	-	-	75541.5	67338.3	61820.5	53569.3	43961	46837	29198.5	29185.3	29489.6	-	1.18452	0.0181006	0.705261	-0.50377	down
T3_positive	MW0109354	Pro-Asp	Amino acid and Its metabolites	Small Peptide	C9H14N2O5	248.123	230.09	1.3514	[M+NH4]+	2.425	3	0.8693	rp	85227-98-1	7079450	-	-	-	21740.9	15310.1	18690.2	9793.42	9001.15	10747.1	13763.9	13500.5	13811.1	-	1.23224	0.034829	0.529978	-0.915994	down
T3_positive	MEDP1904	LPE(18:2/0:0)	GP	PE	C23H44NO7P	478.293	477.286	6.7774	[M+H]+	0.13497	2	0.9738	rp	85046-18-0	52925130	HMDB0011507	-	C00350	2.96176e+06	2.45078e+06	3.60792e+06	8.84349e+06	9.04413e+06	8.72329e+06	6.30894e+06	6.27106e+06	6.30208e+06	ko00563,ko00564,ko01100,ko01110,ko04136,ko04138	1.28524	0.00180379	2.95006	1.56075	up
T3_positive	MW0103505	Coenzyme A	Nucleotide and Its metabolites	Nucleotide and Its metabolites	C21H36N7O16P3S	768.115	767.115	3.2543	[M+H]+	12.3947	3	0.7039	rp	85-61-0	6816	HMDB0001423	-	-	5415.39	5444.97	4543.23	12075.7	10193.1	10417.3	8370.8	8217.18	8273.83	-	1.28446	0.00349288	2.12198	1.08541	up
T3_positive	MW0137483	Bedaquiline	Others	Medicine	C32H31BrN2O2	555.172	556.155	3.0784	[M+H]+	16.8332	3	0.5524	rp	843663-66-1 | 654653-93-7	5388906	-	-	-	521.15	1366.72	630.48	13232.5	11715.8	10968.6	5844.33	5846.72	5780.02	-	1.28195	0.00118741	14.2621	3.83411	up
T3_positive	MEDL01942	Dibutyl phthalate	Benzene and substituted derivatives	Benzene and substituted derivatives	C16H22O4	301.142	278.152	7.247	[M+Na]+	2.11569	2	0.8118	rp	84-74-2	3026	HMDB0033244	-	C14214	3.14725e+06	2.81005e+06	3.09275e+06	1.24328e+06	1.79315e+06	1.77227e+06	2.13272e+06	2.12682e+06	2.13972e+06	-	1.2252	0.00522751	0.531346	-0.912278	down
T3_positive	MW0055080	Mometasone furoate	Others	Medicine	C27H30Cl2O6	538.164	520.142	7.0457	[M+NH4]+	22.8811	3	0.5684	rp	83919-23-7	441336	-	-	C07817	5587.05	6886.63	5014.56	3016.83	3259.56	2978.26	19525.2	20275.1	21611.5	-	1.25429	0.0355848	0.529193	-0.918135	down
T3_positive	MW0004446	4,4'-Methylenebis(2-methylaniline)	Benzene and substituted derivatives	Benzene and substituted derivatives	C15H18N2	244.191	226.147	5.3398	[M+NH4]+	23.1228	3	0.6506	rp	838-88-0	13283	-	-	C19260	22282.8	26098	23690	18570.1	21444	17931.6	24647.7	24675.4	24633.8	-	1.1028	0.0386603	0.80401	-0.314714	down
T3_positive	MW0150710	HC-Toxin	Heterocyclic compounds	Heterocyclic compounds	C21H32N4O6	459.22	436.232	2.8482	[M+Na]+	1.47318	2	0.9356	rp	83209-65-8	107864	-	64768	-	429.82	295.71	297.82	7022.44	8349.16	8182.59	3631.92	3667.73	3585.51	-	1.30705	0.00280928	23.0167	4.52461	up
T3_positive	MEDP0250	Riboflavin	CoEnzyme and vitamins	CoEnzyme and vitamins	C17H20N4O6	377.145	376.138	3.1486	[M+H]+	2.02834	1a	0.947	rp	83-88-5	493570	HMDB0000244	-	C00255	9870.52	16061.3	12589.6	28621.9	31902.9	32154.4	17469.1	17556.6	17451.4	ko00740,ko01100,ko01110,ko01240,ko02010	1.24752	0.00211749	2.40591	1.26658	up
T3_positive	MW0049216	Deoxycholic acid	Bile acids	Bile acids	C24H40O4	415.296	392.293	7.8794	[M+Na]+	6.60716	3	0.685	rp	83-44-3	222528	HMDB0000626	265	C04483	635773	594118	440102	191844	221952	162886	27474.7	28671.5	23431.1	-	1.26739	0.0192019	0.34532	-1.534	down
T3_positive	MW0139229	Ozagrel	Heterocyclic compounds	Heterocyclic compounds	C13H12N2O2	211.086	228.09	6.2581	[M+H-H2O]+	2.21641	3	0.7282	rp	82571-53-7	5282440	-	63059	-	22629.5	27914.3	19900.8	205973	197991	193029	107340	106966	104714	-	1.3064	1.36366e-05	8.47464	3.08315	up
T3_positive	MW0016349	Canesceol	Alcohol and amines	Alcohols	C29H44O11	551.282	568.288	3.7808	[M+H-H2O]+	5.41027	3	0.7025	rp	82228-15-7	3729509	HMDB0034084	-	-	2464.52	3072.6	3035.57	17554.9	10847.2	10892.3	6478.89	6464.89	6432.9	-	1.279	0.0432736	4.58368	2.19651	up
T3_positive	MW0168667	8,11-eicosadiynoic acid	FA	Oxidized lipids	C20H32O2	327.227	304.24	5.2194	[M+Na]+	4.45357	3	0.8569	rp	82073-91-4	1899	-	24087	-	49558.8	3588.26	972.75	92447.9	103757	136738	84793.6	81169.8	84852.7	-	1.03449	0.0115037	6.15196	2.62105	up
T3_positive	MW0122763	Alfuzosin	Heterocyclic compounds	Heterocyclic compounds	C19H27N5O4	390.224	389.206	2.7804	[M+H]+	20.6619	3	0.6534	rp	81403-80-7	2092	HMDB0014490	-	-	54.97	123.74	101.31	5450.95	2416.25	4171.55	806.14	849.51	847.44	-	1.29217	0.0467846	42.9925	5.42601	up
T3_positive	MW0154937	Patellamide C	Alcohol and amines	Amines	C37H46N8O6S2	762.298	762.298	3.0958	[M+]+	1.32709	3	0.7608	rp	81120-74-3	9767970	-	-	-	660.42	967.24	359.89	3312.93	2612.85	2413.19	1364.01	1303.75	1342.62	-	1.21716	0.00486139	4.1956	2.06888	up
T3_positive	MW0154935	Patellamide A	Alcohol and amines	Amines	C35H50N8O6S2	742.332	742.33	3.5176	[M+]+	3.27953	3	0.7552	rp	81120-73-2	157454	-	-	-	41.52	125.25	74.04	4130.59	2565.41	2604.79	798.18	855.05	846	-	1.28938	0.0276721	38.6229	5.27139	up
T3_positive	MW0109041	Pantothenic acid	CoEnzyme and vitamins	CoEnzyme and vitamins	C9H17NO5	242.1	219.111	2.3755	[M+Na]+	0.175	2	0.9568	rp	79-83-4	6613	HMDB0000210	-	C00864	4784.08	4985.35	4354.72	12074.6	10378.1	10657.4	6595.27	6633.01	6594.49	ko00410,ko00770,ko01100,ko01110,ko01240	1.29936	0.0032802	2.34422	1.22911	up
T3_positive	MW0012935	(2r)-3-(Hexadecyloxy)-2-methoxypropyl 2-(trimethylammonio)ethyl phosphate	GP	PC	C25H54NO6P	518.372	495.369	7.6714	[M+Na]+	24.0121	3	0.5919	rp	78858-44-3	127599	-	43417	C00157	19066	16963.1	14839.1	8557.91	4285.7	12028.2	10183.5	10147.6	9813.35	ko00564,ko00590,ko00592,ko01100,ko01110	1.02677	0.0406197	0.488946	-1.03225	down
T3_positive	MW0103367	3-Deaza-2'-deoxyadenosine	Nucleotide and Its metabolites	Nucleotide and Its metabolites	C11H14N4O3	273.096	250.107	7.431	[M+Na]+	0.629712	3	0.8038	rp	78582-17-9	122636	-	96553	-	5004.41	8144.74	6750.85	2925.04	4289.29	2272.22	3964.82	3975.79	3960.05	-	1.12071	0.0406909	0.476711	-1.06881	down
T3_positive	MW0114867	Pyruvaldehyde	Aldehyde,Ketones,Esters	Aldehydes	C3H4O2	141.014	72.0211	1.5317	[M+Na+HCOOH]+	3.3	3	0.7903	rp	78-98-8	880	HMDB0001167	6049	C00546	1697.57	1898.42	1298.77	3379.05	3437.14	3587.83	2736.68	2735.95	2759.89	ko00260,ko00620,ko00640,ko01100	1.25754	0.00469984	2.12554	1.08783	up
T3_positive	MW0139894	Triparanol	Heterocyclic compounds	Heterocyclic compounds	C27H32ClNO2	438.217	437.212	2.5413	[M+H]+	9.08556	3	0.7364	rp	78-41-1	6536	-	6203	-	861.5	1645.4	1395.77	23273.1	16040.9	17614.5	8918.43	8591.84	8675.92	-	1.29505	0.0143044	14.587	3.86662	up
T3_positive	MW0007292	Haloprogin	Benzene and substituted derivatives	Phenolics	C9H4Cl3IO	360.84	359.837	8.9371	[M+H]+	8.68022	3	0.6004	rp	777-11-7	3561	HMDB0014931	-	-	80720.4	78590.6	74745.8	62645.3	53303.9	57147.2	61812.9	61429.1	61654.6	-	1.23886	0.0054145	0.739549	-0.435282	down
T3_positive	MW0142223	2-Amino-4-oxopentanoate	Organic acid and Its derivatives	Organic acid and Its derivatives	C5H9NO3	263.127	131.058	7.7751	[2M+H]+	8.8	3	0.7545	rp	772325-69-6	439983	-	-	C03341	9669.36	9623.25	8023.28	6741.76	4892.3	5725.36	4225.45	4262.55	4239.14	ko00470,ko01100	1.17732	0.0120453	0.635506	-0.654022	down
T3_positive	MW0106413	Dicyclomine	Others	Others	C19H35NO2	327.298	309.267	6.9419	[M+NH4]+	8.03181	3	0.5586	rp	77-19-0	3042	HMDB0014942	-	C06951	22298.5	21403.5	17722.8	10631.2	14604.2	13650.7	13965.2	14117.8	13997.3	-	1.16744	0.015867	0.633068	-0.659568	down
T3_positive	MEDP1348	LPC(16:1/0:0)	GP	LPC	C24H48NO7P	494.324	493.317	6.6744	[M+H]+	0.283215	2	0.9569	rp	76790-27-7	24779461	HMDB0010383	-	C00157	116643	65407.1	161126	458574	352781	480899	249449	246531	249565	ko00564,ko00590,ko00592,ko01100,ko01110	1.217	0.0040829	3.76557	1.91287	up
T3_positive	MW0169283	2-Amino-1-phenylethanol	Alcohol and amines	Alcohols	C8H11NO	120.081	137.084	2.1047	[M+H-H2O]+	0.711462	2	0.9315	rp	7568-93-6	1000	HMDB0001065	59	C02735	90630.5	92649.3	88300.3	257875	233096	228837	146471	145816	146289	-	1.3081	0.00315745	2.65045	1.40624	up
T3_positive	MW0159781	Dibasic sodium phosphate	Heterocyclic compounds	Heterocyclic compounds	Na2HPO4	142.953	141.941	8.9199	[M+H]+	13.2287	3	0.7102	rp	7558-79-4	24203	-	-	C13558	762023	690333	728757	660960	659572	632130	663037	661304	659138	-	1.13459	0.0491301	0.895259	-0.159623	down
T3_positive	MW0125223	Moxonidine	Heterocyclic compounds	Heterocyclic compounds	C9H12ClN5O	280.027	241.073	2.0947	[M+K]+	21.2786	3	0.6497	rp	75438-57-2	4810	HMDB0041938	-	C07451	665.12	573.69	558.48	1603.48	1552.65	1600.28	958.56	956.24	953.98	-	1.30395	0.000141774	2.64643	1.40405	up
T3_positive	MW0103485	beta-Nicotinamide ribose monophosphate	Nucleotide and Its metabolites	Nucleotide and Its metabolites	C11H16N2O8P+	335.065	335.064	1.7281	[M+]+	1.425	3	0.6761	rp	75414-16-3	14181	HMDB0000229	-	C00455	2338.57	2196.57	4618.88	6885.21	11434.9	8117.74	6990.7	7089.98	6784.17	ko00760,ko01100	1.16564	0.031333	2.88811	1.53012	up
T3_positive	MW0124713	Lovastatin	Heterocyclic compounds	Heterocyclic compounds	C24H36O5	405.261	404.256	7.1727	[M+H]+	6.89978	2	0.8311	rp	75330-75-5	53232	HMDB0014372	-	C07074	9119.8	11089.6	9050.91	3821.65	4702.26	4580.34	5950.51	5963.79	6100.76	-	1.27927	0.00746965	0.44785	-1.15891	down
T3_positive	MW0005440	5-(5-Chloro-2,4-Dihydroxyphenyl)-N-Ethyl-4-(4-Methoxyphenyl)isoxazole-3-Carboxamide	Benzene and substituted derivatives	Phenolics	C19H17ClN2O5	389.082	388.083	2.6041	[M+H]+	18.3775	3	0.7607	rp	747413-08-7	135446210	-	45465	-	2519.21	2334.59	2079.67	751.5	1298.17	1716.13	1712.91	1739.82	1762.61	-	1.05096	0.045885	0.543134	-0.880621	down
T3_positive	MW0012952	1-O-Octadecyl-SN-glycero-3-phosphocholine	GP	LPC	C26H56NO6P	532.384	509.385	7.1802	[M+Na]+	17.0708	3	0.8255	rp	74430-89-0	2733532	HMDB0011149	-	C00157	61869.9	57522.5	48353.6	35415.4	32534.4	32088.7	35603.8	33127.7	33748.2	ko00564,ko00590,ko00592,ko01100,ko01110	1.2529	0.023743	0.596368	-0.745725	down
T3_positive	MEDL01969	Granatin A	Tannins	Tannin	C34H24O22	767.062	784.076	2.8847	[M+H-H2O]+	22.6111	3	0.6749	rp	73683-70-2	131752596	HMDB0039271	-	-	179.88	573.13	429.73	2666.17	3214.01	2177.05	859.87	817.94	885.99	-	1.23231	0.00918781	6.81234	2.76815	up
T3_positive	MW0124275	Guanine	Nucleotide and Its metabolites	Nucleotide and Its metabolites	C5H5N5O	152.056	151.049	1.7281	[M+H]+	0.56606	2	0.9334	rp	73-40-5 | 66224-61-1 | 66224-63-3 | 66224-64-4 | 71660-31-6 | 71660-36-1	135398634	HMDB0000132	-	C00242	14145.1	15923	13904.1	58480.6	55583.8	54002.3	31383	31256.5	31258.3	ko00230,ko01100,ko01232	1.30874	0.000124792	3.82211	1.93437	up
T3_positive	MW0107902	L-Leucyl-L-alanine	Amino acid and Its metabolites	Small Peptide	C9H18N2O3	203.139	202.132	1.4446	[M+H]+	2.05758	2	0.9264	rp	7298-84-2	81721	HMDB0028922	44685	-	1694.88	2075.05	1008.59	8464.57	7903.53	7908.44	4055.38	4058.96	4073.53	-	1.27028	0.00022741	5.08035	2.34493	up
T3_positive	MW0107960	L-Threonine	Amino acid and Its metabolites	Amino acids	C4H9NO3	120.065	119.058	0.7807	[M+H]+	1.95083	2	0.9883	rp	72-19-5	6288	HMDB0000167	32	C00188	48959.2	50835.6	47715	35436.3	26440.3	36387.8	41084.1	41470.7	41463.2	ko00260,ko00261,ko00290,ko00470,ko00860,ko00970,ko01100,ko01110,ko01230,ko02010	1.16929	0.0277422	0.666155	-0.586069	down
T3_positive	MW0014839	5(S)-Hydroperoxyeicosatetraenoic acid	FA	Oxidized lipids	C20H32O4	319.225	336.23	6.9991	[M+H-H2O]+	5.12067	2	0.946	rp	71774-08-8	5280778	HMDB0001193	6070	C05356	20713.2	17715.5	17473.1	12014.4	11052.8	7555.95	13284.2	13816	13845.7	ko00590,ko01100	1.17731	0.00925966	0.547804	-0.868269	down
T3_positive	MW0103873	(S)-2-Acetolactate	Organic acid and Its derivatives	Organic acid and Its derivatives	C5H8O4	179.048	132.042	1.3296	[M+HCOO+2H]+	17.025	3	0.6091	rp	71698-08-3	440878	HMDB0006855	-	C06010	142962	147067	130161	199631	189251	230883	175190	177624	176916	ko00290,ko00650,ko00660,ko00770,ko01100,ko01110,ko01210,ko01230	1.23555	0.0214341	1.47496	0.560679	up
T3_positive	MW0143462	3,4-Dihydroxybenzenesulfonic acid	Benzene and substituted derivatives	Benzene and substituted derivatives	C6H6O5S	191.005	189.994	1.859	[M+H]+	6.78291	3	0.776	rp	7134-09-0	189003	-	-	C06674	8912.83	8614.12	7450.51	6259.97	4361.82	5857.96	2317.56	2318.74	2188.66	-	1.12887	0.0200134	0.659785	-0.599932	down
T3_positive	MW0139586	Rifamycin	Heterocyclic compounds	Heterocyclic compounds	C37H47NO12	680.289	697.31	2.4814	[M+H-H2O]+	23.2656	3	0.524	rp	6998-60-3 | 15105-92-7	6324616	-	-	-	378.03	221.38	532.73	8517.59	7089.33	7662.39	3498.09	3493.43	3532.37	-	1.29401	0.00219118	20.5534	4.3613	up
T3_positive	MW0142831	3beta-Cyclopentyl-5alpha-androstan-17beta-ol	Alcohol and amines	Alcohols	C24H40O	345.309	344.308	6.9476	[M+H]+	19.2382	3	0.8209	rp	6944-47-4	246162	-	-	-	64874.6	64749.1	54734.6	39508.1	39966.5	37047.7	43480.9	43628.6	43236	-	1.26805	0.0160888	0.632042	-0.661907	down
T3_positive	MW0170017	Xanthine	Nucleotide and Its metabolites	Nucleotide and Its metabolites	C5H4N4O2	194.068	152.033	1.5194	[M+CH3CN+H]+	2.675	2	0.96	rp	69-89-6	1188	HMDB0000292	82	C00385	4094.72	4686.36	4086.49	7018.17	8708.96	6994.15	4987.49	4938.73	4947.86	ko00230,ko01100,ko01110,ko01232	1.25336	0.0194083	1.76578	0.820304	up
T3_positive	MEDN1011	Mannitol	Carbohydrates and Its metabolites	Sugar alcohols	C6H14O6	183.086	182.079	0.7977	[M+H]+	3.92538	2	0.9268	rp	69-65-8	6251	HMDB0000765	142	C00392	87678.4	83937.2	74538.5	59058.3	52854.9	53593.4	59780.9	59463.3	59479.2	ko00051,ko01100,ko02010	1.25497	0.00914386	0.67237	-0.572673	down
T3_positive	MW0107794	Leu-Gly	Amino acid and Its metabolites	Small Peptide	C8H16N2O3	189.123	188.116	1.1412	[M+H]+	3.01472	3	0.7817	rp	686-50-0	97364	HMDB0028929	24012	-	372.32	628.78	227.27	5653.22	3526.47	5513.41	1718.76	1653.16	1639.57	-	1.27084	0.0201504	11.9615	3.58032	up
T3_positive	MW0063760	Teprenone	Terpenoids	Ditepenoids	C23H38O	295.277	330.292	7.0853	[M+H-2H2O]+	5.83521	3	0.6903	rp	6809-52-5 | 3796-63-2	5282199	HMDB0031846	-	-	58036.4	56553.4	45871.9	32516.7	34339.7	33810.1	37250.2	37236.8	36852.3	-	1.24638	0.0328641	0.627355	-0.672646	down
T3_positive	MW0109553	s-(p-Nitrobenzyl)glutathione	CoEnzyme and vitamins	CoEnzyme and vitamins	C17H22N4O8S	443.125	442.116	1.0892	[M+H]+	0.028614	3	0.8019	rp	6803-19-6	97538	-	4098	-	554.44	177.29	5085.63	21632.6	30163.3	28806.2	14498.6	14997.6	14948.9	-	1.14246	0.00288611	13.8554	3.79238	up
T3_positive	MEDP1333	LPC(0:0/20:4)	GP	LPC	C28H50NO7P	544.338	543.332	7.2488	[M+]+	14.4168	3	0.7373	rp	67341-29-1	52924038	HMDB0061699	-	C00157	554839	725412	949161	4.24781e+06	2374319	3.67455e+06	2.35599e+06	2.35394e+06	2.35485e+06	ko00564,ko00590,ko00592,ko01100,ko01110	1.25674	0.0353673	4.61856	2.20744	up
T3_positive	MW0109077	Perhexiline maleate	Others	Medicine	C23H39NO4	300.262	393.288	7.3964	[M+Na]+	12.5153	3	0.5278	rp	6724-53-4 | 103516-75-2 | 103516-76-3	5284439	-	-	-	195.64	218.9	168.54	72.29	103.08	25.77	864.18	841.91	849.29	-	1.07891	0.0129773	0.344961	-1.53549	down
T3_positive	MEDP0322	L-Homoserine	Amino acid and Its metabolites	Amino acids	C4H9NO3	102.054	119.058	0.7807	[M+H-H2O]+	1.6	2	0.9037	rp	672-15-1	12647	HMDB0000719	5687	C00263	61534.8	54845.2	52908.6	32193	30459.4	35356.9	43032.1	43116.6	43250.9	ko00260,ko00270,ko00300,ko00920,ko01100,ko01110,ko01230	1.27742	0.00363654	0.578948	-0.788494	down
T3_positive	MW0109620	Ser-Leu	Amino acid and Its metabolites	Small Peptide	C9H18N2O4	219.134	218.127	1.9797	[M+H]+	0.9	3	0.627	rp	6665-16-3	7015695	HMDB0029043	65223	-	3070.69	3320.02	2716.93	1120.78	927.44	619.58	1736.74	1709.69	1717.81	-	1.25915	0.0008225	0.292919	-1.77143	down
T3_positive	MW0169988	Uracil	Nucleotide and Its metabolites	Nucleotide and Its metabolites	C4H4N2O2	113.034	112.027	1.415	[M+H]+	1.56498	2	0.9572	rp	66-22-8	1174	HMDB0000300	258	C00106	47885.4	47621.7	52446.3	21504.5	21152.1	21297.4	30959.4	30962.9	31132.2	ko00240,ko00410,ko00770,ko01100,ko01232	1.30824	0.00301031	0.432258	-1.21004	down
T3_positive	MEDL00344	Glycyl-L-tyrosine	Amino acid and Its metabolites	Small Peptide	C11H14N2O4	364.065	238.095	1.3468	[M+]+	5.66538	3	0.7125	rp	658-79-7	92829	HMDB0028853	23813	-	319186	308922	260838	154382	175302	161691	237893	236648	236673	-	1.2752	0.0112062	0.552762	-0.855271	down
T3_positive	MW0146807	B-Norcholesterol	Hormones and hormone related compounds	Hormones and hormone related compounds	C26H44O	355.338	372.339	7.8445	[M+H-H2O]+	6.28372	3	0.701	rp	6544-70-3	242346	-	-	-	48307.9	44778.7	32753.8	21144.4	26230	15841.8	5318.47	5096.81	3212.42	-	1.15674	0.0269395	0.502352	-0.993231	down
T3_positive	MEDN0243	Pyridoxine	Heterocyclic compounds	Heterocyclic compounds	C8H11NO3	169.076	169.074	2.9395	[M+]+	5.3888	3	0.5359	rp	65-23-6	1054	HMDB0000239	-	C00314	621.06	813.85	378.28	3496.92	3282.22	3032.46	1619.3	1569.4	1615.12	ko00750,ko01100,ko01240	1.2689	0.000135551	5.41124	2.43596	up
T3_positive	MEDP1616	Pro-ala	Amino acid and Its metabolites	Small Peptide	C8H14N2O3	231.071	186.1	1.5368	[M-H+2Na]+	1.1	2	0.9318	rp	6422-36-2	6347578	-	-	-	2672.3	2591.14	2228.42	3301.27	3304.74	3038.19	2170.51	2171.28	2179.41	-	1.17654	0.016284	1.28729	0.364338	up
T3_positive	MW0150558	Glycerophosphoglycerol	Organic acid and Its derivatives	Phosphoric acids	C6H15O8P	247.049	246.05	1.5368	[M+H]+	22.7541	3	0.6345	rp	6418-92-4	439964	-	-	C03274	18576.6	18991.5	16018.9	24202	23817.4	24088.8	15290.3	15270.1	15372.4	-	1.23549	0.0206158	1.34563	0.42828	up
T3_positive	MW0105409	Acetic acid	Organic acid and Its derivatives	Organic acid and Its derivatives	C2H4O2	61.028	60.0211	0.8146	[M+H]+	1.31885	3	0.6774	rp	64-19-7	176	HMDB0000042	3206	C00033	66733.8	62097.6	69441.3	50921.7	51211.9	48499.5	60943.4	60918.1	60298.1	ko00010,ko00430,ko00440,ko00620,ko00630,ko00660,ko00680,ko00920,ko01100,ko01110,ko01200	1.2673	0.00953073	0.759727	-0.396446	down
T3_positive	MW0014038	3-Hexaprenyl-4,5-dihydroxybenzoic acid	Benzene and substituted derivatives	Benzene and substituted derivatives	C37H54O4	545.401	562.402	8.3815	[M+H-H2O]+	0.673834	3	0.614	rp	63975-40-6	5280760	HMDB0001063	5976	C05200	45129.1	43730.4	42878.1	33211.5	29546.3	29190.2	34870.2	34873.2	35010.8	-	1.27403	0.0028117	0.697964	-0.518776	down
T3_positive	MW0109196	L-Phenylalanine	Amino acid and Its metabolites	Amino acids	C9H11NO2	166.086	165.079	2.1047	[M+H]+	0.578628	2	0.983	rp	63-91-2	6140	HMDB0000159	28	C00079	67448.3	73157.7	65187.4	196859	182688	179360	113650	113308	113076	ko00360,ko00400,ko00460,ko00470,ko00970,ko00999,ko01100,ko01110,ko01210,ko01230,ko02010	1.30714	0.000457121	2.71586	1.44141	up
T3_positive	MW0108213	Methionine	Amino acid and Its metabolites	Amino acids	C5H11NO2S	150.058	149.051	0.8662	[M+H]+	1.0902	2	0.9445	rp	63-68-3	6137	HMDB0000696	5664	C00073	30837.4	34643.5	17689.4	51990.9	49555.1	50888	21269.6	14607	19591.9	ko00270,ko00470,ko00970,ko00999,ko01100,ko01110,ko01210,ko01230,ko01240	1.10341	0.0438069	1.83279	0.874045	up
T3_positive	MW0053898	Palmitaldehyde	Aldehyde,Ketones,Esters	Aldehydes	C16H32O	263.238	240.245	8.0436	[M+Na]+	7.45	3	0.7642	rp	629-80-1	984	HMDB0001551	6317	C00517	501.1	437.95	532.86	2926.27	4750.25	2716.03	1488.05	1559.06	1653.25	ko00071	1.28688	0.0438518	7.06059	2.81979	up
T3_positive	MEDP0513	Palmitic amide	FA	Others	C16H33NO	256.264	255.256	7.9728	[M+H]+	1.61046	1a	0.9746	rp	629-54-9	69421	HMDB0012273	-	-	87938.1	95009.1	86649.1	55245.8	58806.8	27193.2	56776.5	57354	56753.9	-	1.07254	0.0430194	0.523917	-0.932591	down
T3_positive	MW0009664	Resorcinol sulfoxide	Benzene and substituted derivatives	Benzene and substituted derivatives	C12H10O5S	249.028	266.025	1.5142	[M+H-H2O]+	12.1457	3	0.6593	rp	62845-75-4	5044578	-	4087	-	2355.77	2809.03	2120.72	7619.51	8031.46	8025.98	4565.85	4512.33	4555.93	-	1.29895	6.46904e-05	3.24986	1.70038	up
T3_positive	MW0014553	4-Oxoretinol	Alcohol and amines	Alcohols	C20H28O2	323.196	300.209	7.6541	[M+Na]+	7.92684	3	0.7021	rp	62702-55-0	5289090	HMDB0012329	-	C16683	650.36	1712.67	3030.46	11454.8	21103.4	12459.1	8145.66	8109.42	8040.5	-	1.20335	0.0439718	8.3466	3.06119	up
T3_positive	MW0052448	Docosahexaenoic acid	FA	FFA	C22H32O2	329.243	328.24	7.9139	[M+H]+	11.172	2	0.9099	rp	6217-54-5	445580	HMDB0002183	3457	C06429	151399	157196	148637	79689.4	83494.9	84740	103139	102105	103180	ko01040	1.30805	8.76535e-05	0.54223	-0.883024	down
T3_positive	MEDP0125	Choline	Tryptamines,Cholines,Pigments	Cholines	C5H14NO+	104.106	104.108	0.7637	[M+]+	1.92064	1a	0.9299	rp	62-49-7	305	HMDB0000097	56	C00114	338065	314058	324335	455926	484165	441865	373730	369193	373349	ko00260,ko00564,ko01100,ko02010	1.28585	0.00205709	1.41528	0.501083	up
T3_positive	MW0104009	(S)-3-Hydroxybutyric acid	Organic acid and Its derivatives	Organic acid and Its derivatives	C4H8O3	149.023	104.047	7.2443	[M-H+2Na]+	10.9	3	0.7455	rp	6168-83-8	94318	HMDB0000442	-	C03197	639327	625954	581833	303108	402457	383147	467219	469474	469435	-	1.24304	0.00450257	0.589412	-0.762651	down
T3_positive	MW0126465	Rolipram	Heterocyclic compounds	Heterocyclic compounds	C16H21NO3	276.155	275.152	2.0425	[M+H]+	7.43601	3	0.7451	rp	61413-54-5	5092	-	45307	-	29007.2	31925.2	26340.7	5226.92	3633.78	346.74	15095.6	15049.8	14957.5	-	1.11567	0.000293274	0.105501	-3.24467	down
T3_positive	MW0117239	1-Methylxanthine	Nucleotide and Its metabolites	Nucleotide and Its metabolites	C6H6N4O2	230.07	166.049	1.415	[M+CH3CN+Na]+	12.3	3	0.7008	rp	6136-37-4	80220	HMDB0010738	-	C16358	2755.75	2547.18	3061.07	4314.84	4460.15	4681.26	3546.27	3558.68	3569.62	ko01100,ko01110	1.27479	0.00120111	1.60883	0.686011	up
T3_positive	MW0121872	6-[2-[5-chloro-2-[(2,4-difluorophenyl)methoxy]phenyl]-1-cyclopentenyl]pyridine-2-carboxylic Acid	Organic acid and Its derivatives	Organic acid and Its derivatives	C24H18ClF2NO3	441.1	441.094	0.8454	[M+]+	10.83	3	0.7173	rp	612831-24-0	10238338	-	45261	-	49884.4	51922.9	36144.2	17243.8	14760.8	15350.2	24282.1	23301.3	23668.6	-	1.27701	0.0237617	0.343272	-1.54258	down
T3_positive	MW0054544	1-Arachidonoyl-sn-glycero-3-phosphocholine	GP	LPC	C28H50NO7P	544.337	543.332	8.7294	[M+H]+	4.20693	2	0.9168	rp	60701-99-7	24779476	HMDB0010395	-	C00157	168342	173934	370942	1.29083e+06	1.77465e+06	987004	566961	572461	572265	ko00564,ko00590,ko00592,ko01100,ko01110	1.23808	0.0317407	5.68197	2.50639	up
T3_positive	MW0145175	(12E)-16-ethyl-6,8,9-trihydroxy-12-(methoxymethyl)-25,27-dimethyl-2-propyl-1-oxa-4-azacyclooctacosa-12,14-diene-3,20,28-trione	Heterocyclic compounds	Heterocyclic compounds	C35H61NO8	606.428	623.44	7.644	[M+H-H2O]+	17.0171	3	0.6734	rp	60616-99-1	6438547	-	-	-	12389.4	10839.1	12406.1	7866.58	7909.46	7106.2	8030.63	8045.47	7795.49	-	1.27158	0.00560176	0.642136	-0.639049	down
T3_positive	MW0154301	Narbomycin	Heterocyclic compounds	Heterocyclic compounds	C28H47NO7	510.347	509.335	6.9591	[M+H]+	5.37846	3	0.5244	rp	6036-25-5	5282036	-	-	C11998	3425.22	1180.28	6594.7	18185.4	16178.4	13665.2	7445.31	7357.08	7781.43	ko01100,ko01110	1.12131	0.00428504	4.28823	2.10038	up
T3_positive	MW0109774	Suberylglycine	Amino acid and Its metabolites	Amino acid derivatives	C10H17NO5	254.092	231.111	2.5167	[M+Na]+	22.0645	3	0.7999	rp	60317-54-6	6453952	HMDB0000953	5899	-	11412	10366.8	9273.88	6059.98	6771.88	6571.08	7927.24	7916.71	7916.07	-	1.26029	0.0161695	0.62484	-0.678442	down
T3_positive	MW0114733	L-Gulose	Carbohydrates and Its metabolites	Sugars	C6H12O6	203.059	180.063	2.1085	[M+Na]+	14.9991	3	0.6072	rp	6027-89-0	10130220	HMDB0012326	-	C15923	33677.4	31923.9	31966.7	28493.9	29803.7	25928.1	22399.4	22221.5	22578	ko00053	1.12742	0.040647	0.863252	-0.212146	down
T3_positive	ZINC895703	D-Homocysteine	Amino acid and Its metabolites	Amino acids	C4H9NO2S	153.076	135.035	0.8832	[M+NH4]+	17.7124	3	0.7345	rp	6027-14-1 | 454-28-4	134603	HMDB0000742	-	-	41436.7	40927.5	35194.9	31571.6	27327.9	28588.3	32153.3	32269.8	32696.3	-	1.19036	0.0190066	0.744203	-0.426232	down
T3_positive	MW0103715	Zeatin riboside	Nucleotide and Its metabolites	Nucleotide and Its metabolites	C15H21N5O5	436.122	351.154	2.1912	[M+K+HCOOH]+	1.60505	2	0.9159	rp	6025-53-2 | 28542-78-1	6440982	HMDB0030388	-	-	642.28	1984.4	787.97	3539.73	3044.07	3664.21	1224.2	1117.78	1225.66	-	1.13835	0.0197165	3.00119	1.58553	up
T3_positive	MW0062277	prostaglandin J2	Hormones and hormone related compounds	Hormones and hormone related compounds	C20H30O4	357.196	334.214	7.7925	[M+Na]+	17.9045	3	0.6148	rp	60203-57-8	5280884	HMDB0002710	3464	C05957	8332.07	9879.6	9302.65	6101.27	5548.74	5014.97	6099.88	5868.38	5961.64	ko00590,ko01100	1.25641	0.00409999	0.605684	-0.723363	down
T3_positive	MEDN0383	FFA(18:2)	FA	FFA	C18H32O2	263.237	280.24	7.7232	[M+H-H2O]+	1.80599	1b	0.7751	rp	60-33-3	5280450	HMDB0000673	191	C01595	4069.69	4037.91	1640.49	7156.21	8139.7	8322.12	9584.53	9582.72	9512.14	ko01040,ko01100	1.10774	0.0163463	2.42284	1.2767	up
T3_positive	MEDN0006	L-Tyrosine	Amino acid and Its metabolites	Amino acids	C9H11NO3	182.081	181.074	1.3468	[M+H]+	0.784135	1a	0.9719	rp	60-18-4	6057	HMDB0000158	34	C00082	17795.2	16568	16762.2	51744.8	47475.2	48017.8	29633	29396.8	29684.8	ko00130,ko00261,ko00350,ko00360,ko00400,ko00460,ko00680,ko00730,ko00970,ko00999,ko01100,ko01110,ko01210,ko01230,ko01240	1.30958	0.00086704	2.87994	1.52604	up
T3_positive	MEDL02339	Diethyl hydrogen phosphate	Aldehyde,Ketones,Esters	Esters	C4H11O4P	119.018	154.04	0.5729	[M+H-2H2O]+	18.4441	3	0.5351	rp	598-02-7	654	HMDB0012209	-	C06608	7993.42	6652.57	5722.91	15971.4	10691.4	14997.6	8933.9	8946.79	9116.04	-	1.20231	0.0342509	2.04529	1.0323	up
T3_positive	MW0003799	3-Amino-2-naphthoic acid	Benzene and substituted derivatives	Benzene and substituted derivatives	C11H9NO2	188.071	187.063	2.5341	[M+H]+	0.512919	3	0.6104	rp	5959-52-4	22244	-	34509	-	70778.5	79082.3	68318.6	306333	277545	304103	154185	155253	154011	-	1.30862	0.00059417	4.06996	2.02502	up
T3_positive	MADN0618	alpha-Hydroxyisobutyric acid	Organic acid and Its derivatives	Organic acid and Its derivatives	C4H8O3	105.047	104.047	1.4968	[M+H]+	16.9642	3	0.7341	rp	594-61-6	11671	HMDB0000729	3750	-	6847.74	7886.33	6672.45	5549.87	5499.45	5454.84	5842.07	5868.49	5867.86	-	1.21598	0.049081	0.770988	-0.375221	down
T3_positive	MEDP0053	L-Dopa	Amino acid and Its metabolites	Amino acids	C9H11NO4	198.073	197.069	1.5081	[M+H]+	6.26644	1b	0.777	rp	59-92-7	6047	HMDB0000181	42	C00355	6005.32	5417.63	4029.83	377.89	342.86	392.49	2355.74	2347.72	2339.75	ko00350,ko01100,ko01110	1.30577	0.0146375	0.0720414	-3.79503	down
T3_positive	FDATN01492	DL-Methionine	Amino acid and Its metabolites	Amino acids	C5H11NO2S	150.058	149.051	1.2783	[M+H]+	1.62551	2	0.9581	rp	59-51-8 | 26062-47-5 | 7005-18-7 | 33807-07-7	876	HMDB0033951	-	C01733	18291	18470.5	18415.3	39322	37653.8	36733.9	29409	30000	29546.5	-	1.3102	0.00143621	2.06083	1.04322	up
T3_positive	MW0107770	Leu-Val-Leu	Amino acid and Its metabolites	Small Peptide	C17H33N3O4	344.254	343.247	3.2896	[M+H]+	5.53636	3	0.748	rp	58337-01-2	11515702	-	19415	-	862.46	727.86	884.03	4157.7	3601.9	3382.04	1887.62	1839.69	1926.51	-	1.30379	0.00475469	4.50286	2.17084	up
T3_positive	MW0169991	Uridine	Nucleotide and Its metabolites	Nucleotide and Its metabolites	C9H12N2O6	245.077	244.07	1.415	[M+H]+	2.46795	2	0.9877	rp	58-96-8	6029	HMDB0000296	90	C00299	17507.8	15350	17898	8065.21	8327.83	8277.36	11557.4	11487.3	11530.6	ko00240,ko01100,ko01232,ko02010	1.30028	0.00771052	0.486061	-1.04079	down
T3_positive	MW0103627	NADH	Nucleotide and Its metabolites	Nucleotide and Its metabolites	C21H29N7O14P2	710.095	665.125	1.9028	[M-H+2Na]+	1.50684	2	0.9332	rp	58-68-4	439153	HMDB0001487	3687	C00004	9761.64	9175.96	9392.34	6325.77	4041.29	5435.76	7332.38	7374.71	7333.27	ko00190,ko01100	1.19592	0.0191513	0.557813	-0.842146	down
T3_positive	MW0168692	Adenosine	Nucleotide and Its metabolites	Nucleotide and Its metabolites	C10H13N5O4	268.104	267.097	2.0252	[M+H]+	0.556976	2	0.9845	rp	58-61-7	60961	HMDB0000050	86	C00212	382130	436636	433968	1.49292e+06	1.47413e+06	1.4065e+06	815535	812486	812526	ko00230,ko01100,ko01232,ko02010	1.30833	1.69303e-05	3.49121	1.80373	up
T3_positive	MW0147056	(13R,17R)-17-[(1R,2S)-1,2-dihydroxyheptyl]-1,5,10-triazabicyclo[11.4.0]heptadec-15-en-11-one	Heterocyclic compounds	Heterocyclic compounds	C21H39N3O3	382.31	381.299	8.4553	[M+H]+	9.16407	3	0.7916	rp	57682-64-1	100419	-	-	-	3033.73	2633.19	2694.83	2064.01	1254.38	1335.63	1867.49	1959.52	1839.74	-	1.15453	0.0246633	0.556584	-0.845327	down
T3_positive	MW0127046	Dihydro-5-propyl-2(3H)-furanone	Aldehyde,Ketones,Esters	Ketones	C7H12O2	146.125	128.084	6.2754	[M+NH4]+	16.431	3	0.699	rp	57129-71-2	7742	HMDB0031681	-	-	13475.5	16275.4	12896.8	10187.9	11447.5	9406.16	8194.38	7768.01	7512.53	-	1.13845	0.0447804	0.727861	-0.458266	down
T3_positive	MEDP0428	Cholesterol	Hormones and hormone related compounds	Hormones and hormone related compounds	C27H46O	369.351	386.355	7.8445	[M+H-H2O]+	3.92129	3	0.7641	rp	57-88-5	5997	HMDB0000067	-	C00187	6853.43	5436.95	6527.09	2537.85	1629.27	3104.83	3629.08	3701.21	3706.2	ko00100,ko01100	1.20886	0.0031635	0.386447	-1.37166	down
T3_positive	MW0052607	Ergosterol	Hormones and hormone related compounds	Hormones and hormone related compounds	C28H44O	379.336	396.339	6.5527	[M+H-H2O]+	1.3764	3	0.8721	rp	57-87-4	444679	HMDB0000878	-	C01694	275.85	29513.9	145.32	52191.1	53551.4	83691.6	100847	113042	112409	ko00100,ko01100,ko01110	1.011	0.0200576	6.32816	2.66179	up
T3_positive	MW0194043	Leurocristine	Alkaloids	Alkaloids	C46H56N4O10	824.38	824.4	3.0609	[M+]+	19.6793	3	0.5999	rp	57-22-7 | 132142-73-5	5388993	HMDB0014681	-	-	163.04	129.89	137.29	10780.8	6004.17	7006.33	3137.65	3147.14	3123.07	-	1.30697	0.0331469	55.3004	5.78922	up
T3_positive	MW0113748	6-Kestose	Heterocyclic compounds	Heterocyclic compounds	C18H32O16	527.158	504.169	1.0965	[M+Na]+	0.113818	2	0.925	rp	562-68-5	9914062	HMDB0033673	-	-	45882.5	18376.3	81433.6	358556	410355	411341	211773	222403	217551	-	1.22408	0.000168377	8.10099	3.0181	up
T3_positive	MW0113836	Acarbose	Carbohydrates and Its metabolites	Sugars	C25H43NO18	646.269	645.248	2.3931	[M+H]+	5.00132	3	0.6818	rp	56180-94-0	41774	HMDB0014429	-	C06802	173.32	188.82	226.92	6781.67	3780.17	4110.75	1085.99	1164.76	986.36	ko01100,ko01110	1.30277	0.0385784	24.9085	4.63857	up
T3_positive	MW0151759	Ionomycin	Organic acid and Its derivatives	Organic acid and Its derivatives	C41H72O9	691.528	708.518	7.9728	[M+H-H2O]+	22.4774	3	0.785	rp	56092-81-0	6912226	-	96378	-	3085.22	3693.71	2829.87	810.05	1132.37	394.34	1817.35	1773.65	1752.75	-	1.20852	0.00215206	0.24319	-2.03985	down
T3_positive	MW0107683	L-cystathionine	Amino acid and Its metabolites	Amino acid derivatives	C7H14N2O4S	205.065	222.067	1.9187	[M+H-H2O]+	1.64335	3	0.7283	rp	56-88-2	439258	HMDB0000099	39	C02291	14872.3	26170.2	12503.5	159654	146982	145118	84586.6	83854.2	84482.4	ko00260,ko00270,ko01100,ko01110,ko01230,ko01240	1.28517	2.98831e-05	8.43674	3.07669	up
T3_positive	MW0106988	Glutamine	Amino acid and Its metabolites	Amino acids	C5H10N2O3	147.075	146.069	0.7686	[M+H]+	2.26239	2	0.9773	rp	56-85-9	5961	HMDB0000641	5614	C00064	123571	138533	113168	75598.9	76234.9	84525.8	103663	102059	103512	ko00220,ko00230,ko00240,ko00250,ko00470,ko00630,ko00750,ko00910,ko00970,ko01100,ko01230,ko01232,ko01240,ko02010	1.25681	0.0146539	0.629836	-0.666952	down
T3_positive	MW0168854	Bis(3-aminopropyl)amine	Alcohol and amines	Amines	C6H17N3	154.133	131.142	0.729	[M+Na]+	4.11546	3	0.7288	rp	56-18-8	5942	HMDB0011634	-	C03375	5582.88	6332.85	5240.65	34317.8	31573	30063.8	20037.4	20202.1	20093.6	ko00330,ko01100	1.30815	0.00128355	5.59294	2.48361	up
T3_positive	MW0125165	Methylthiouracil	Heterocyclic compounds	Heterocyclic compounds	C5H6N2OS	143.02	142.02	0.5729	[M+H]+	19.1566	3	0.6105	rp	56-04-2 | 1123-10-0 | 91795-77-6	667493	-	44256	C19265	139547	116698	101510	286049	204419	252689	170150	170033	170149	-	1.23354	0.0184702	2.07727	1.05469	up
T3_positive	MEDP1685	Phytosphingosine	SP	SPH	C18H39NO3	356.257	317.293	5.3914	[M+K]+	1.91798	2	0.9467	rp	554-62-1	122121	HMDB0004610	7066	C12144	15403.1	10228.6	14501.6	26879.1	27376.3	19358.9	17781.6	17336.7	17216.5	ko00600,ko01100	1.14441	0.0295438	1.83424	0.875181	up
T3_positive	MW0102809	Tiamulin	Terpenoids	Ditepenoids	C28H47NO4S	494.321	493.323	7.1721	[M+H]+	10.8306	2	0.8279	rp	55297-95-5	656958	-	-	-	11587.9	11120.9	14198.2	16361	19216.7	16390.6	13030.5	13154.9	13390.1	-	1.15395	0.0203371	1.40809	0.493735	up
T3_positive	MW0137862	Daidzin	Flavonoids	Isoflavones	C21H20O9	439.101	416.111	3.3772	[M+Na]+	1.54069	2	0.8547	rp	552-66-9	107971	HMDB0033991	-	C10216	105827	111818	92638	139661	138106	124916	112330	111501	112086	ko01100	1.17073	0.0148331	1.29779	0.376058	up
T3_positive	MW0107837	Leupeptin	Amino acid and Its metabolites	Small Peptide	C20H38N6O4	427.304	426.296	7.8445	[M+H]+	4.13169	2	0.96	rp	55123-66-5 | 103476-89-7 | 24365-47-7	72429	-	44689	-	197090	211040	149768	101115	119967	106289	136034	136019	135329	-	1.20124	0.0438083	0.586795	-0.769072	down
T3_positive	MW0123715	Dimetridazole	Heterocyclic compounds	Heterocyclic compounds	C5H7N3O2	159.091	141.054	2.5341	[M+NH4]+	11.0507	3	0.7193	rp	551-92-8	3090	-	-	-	1351.74	1504.88	1184.97	6751.72	6240.27	6322.77	3284.46	3269.58	3252.02	-	1.3066	6.09839e-05	4.779	2.25671	up
T3_positive	MW0005966	Acitretin	Organic acid and Its derivatives	Organic acid and Its derivatives	C21H26O3	344.226	326.188	7.382	[M+NH4]+	8.94917	3	0.778	rp	55079-83-9	5284513	HMDB0014602	-	-	4132.77	4658.66	3038.5	1517.71	1301.07	1712.84	7017.65	7035.58	6823.26	-	1.24981	0.0302674	0.383064	-1.38434	down
T3_positive	MW0016248	Busulfan	Organic acid and Its derivatives	Sulfonic acids	C6H14O6S2	264.054	246.023	2.0947	[M+NH4]+	6.59852	3	0.7466	rp	55-98-1	2478	HMDB0015143	-	C06862	3562.68	3714.58	3272	7768.9	7772	7330.43	5354.84	5389.99	5290.56	-	1.30418	3.42825e-05	2.16805	1.1164	up
T3_positive	FDATP00236	Gentian violet	Others	Medicine	C25H30ClN3	372.242	407.213	5.3514	[M+]+	2.57109	3	0.657	rp	548-62-9	11057	-	-	-	5089.42	3284.04	5194.93	8406.53	6352.12	6490.07	6606.56	6608.49	6446.48	-	1.04837	0.0480705	1.56605	0.647126	up
T3_positive	MW0014719	5beta-Cholanic acid	Bile acids	Bile acids	C24H40O2	361.303	360.303	6.7604	[M+H]+	16.089	3	0.6933	rp	546-18-9	92803	-	-	C19642	532392	525118	401781	62724.1	164280	84133.4	159575	159681	157466	-	1.23419	0.00263074	0.213211	-2.22964	down
T3_positive	MW0052489	Doxercalciferol	Alcohol and amines	Alcohols	C28H44O2	413.334	412.334	8.0002	[M+H]+	11.3404	3	0.8242	rp	54573-75-0	5281107	-	-	C08211	32110.2	28823.5	31580	15280	3583.32	7643.74	13714.8	14962.5	14424.8	-	1.1235	0.0169594	0.286521	-1.80329	down
T3_positive	MW0106811	Gln-Gln	Amino acid and Its metabolites	Small Peptide	C10H18N4O5	292.166	274.128	1.4039	[M+NH4]+	8.83914	3	0.7439	rp	54419-93-1	7010588	HMDB0028795	23971	-	822.24	465.84	570.92	6962.76	7467.36	7440.74	4270.27	4440.48	4423.25	-	1.30025	1.8652e-05	11.7649	3.55641	up
T3_positive	MEDL02767	Palmitoylethanolamide	FA	Others	C18H37NO2	300.29	299.282	7.7455	[M+H]+	1.71535	3	0.7858	rp	544-31-0	4671	HMDB0002100	-	C16512	3047.58	2202.54	2741.9	4135.27	5597.94	6058.91	3313.23	3270.84	3268.6	-	1.19745	0.0315039	1.97599	0.982573	up
T3_positive	MEDP1230	Glycidyl oleate	GL	MG	C21H38O3	339.29	338.282	7.0681	[M+H]+	0.516076	3	0.7905	rp	5431-33-4	5354568	-	-	C19426	161963	146779	194310	981968	666442	925898	496349	495690	490623	-	1.29294	0.0175977	5.11737	2.3554	up
T3_positive	MW0169387	L-Carnitine	Amino acid and Its metabolites	Amino acids	C7H15NO3	162.112	161.105	0.7464	[M+H]+	2.10371	2	0.9723	rp	541-15-1	10917	HMDB0000062	52	C00318	17765.7	18880.6	18156.2	39456.9	35666	41383.6	35126.3	34549.6	34624.9	-	1.3029	0.00520189	2.12594	1.0881	up
T3_positive	MEDP1759	Etonogestrel	CoEnzyme and vitamins	CoEnzyme and vitamins	C22H28O2	325.212	324.209	8.0522	[M+H]+	11.3946	1a	0.8037	rp	54048-10-1	6917715	HMDB0014439	-	-	73123.6	67894.3	90289.7	118806	147776	114302	131762	131610	133935	-	1.18549	0.021971	1.64666	0.719541	up
T3_positive	MEDL02295	Hordenine	Benzene and substituted derivatives	Phenolics	C10H15NO	166.12	165.115	0.7807	[M+H]+	6.52577	3	0.7018	rp	539-15-1	68313	HMDB0004366	7055	C06199	103798	106871	97163.9	31410.1	27719.7	32828.6	56452.8	56254	56111.3	ko00350,ko01100	1.30533	0.000181041	0.298728	-1.74309	down
T3_positive	MW0013397	2-Arachidonoylglycerol	GL	MG	C23H38O4	361.272	378.277	7.4656	[M+H-H2O]+	4.10966	2	0.9067	rp	53847-30-6	5282280	HMDB0004666	-	C13856	5049.99	5070.36	7409.91	2507.39	3763.18	1656.59	3862.12	3834.56	3804.49	-	1.10592	0.0349995	0.452199	-1.14497	down
T3_positive	MW0109274	Pipecolic acid	Organic acid and Its derivatives	Organic acid and Its derivatives	C6H11NO2	130.086	129.079	1.2671	[M+H]+	2.27461	2	0.9487	rp	535-75-1	849	HMDB0000070	50	C00408	6798.21	7099.28	5935.36	18478.5	15487.3	14209.1	11586.5	11494.8	11348.1	ko00310,ko01100,ko01110	1.28371	0.0126312	2.42904	1.28039	up
T3_positive	MW0107873	L-Histidine trimethylbetaine	Heterocyclic compounds	Indole and Its derivatives	C9H15N3O2	198.123	197.116	0.729	[M+H]+	2.33363	3	0.6735	rp	534-30-5	3083620	HMDB0029422	-	C05575	36150.6	38604	32230	169566	149623	165759	102674	102686	102995	ko00340,ko01100	1.30772	0.00111355	4.53288	2.18043	up
T3_positive	MW0001273	1,2,4-Benzenetriol	Benzene and substituted derivatives	Phenolics	C6H6O3	253.076	126.032	2.3493	[2M+H]+	12.3	3	0.7219	rp	533-73-3	10787	HMDB0124831	506	C02814	1298.58	422.36	194.91	3601.34	3885.97	3801.55	2451.72	2479.14	2371.99	ko01100	1.15796	0.00825306	5.89235	2.55884	up
T3_positive	MW0138112	Esculin	Heterocyclic compounds	Heterocyclic compounds	C15H16O9	379.045	340.079	1.5142	[M+K]+	6.2797	3	0.6918	rp	531-75-9	5281417	HMDB0030820	-	C09264	1968.69	2566.59	2197.15	12492.3	14542.9	14940.4	7174.15	7217.24	7222.71	-	1.30481	0.00284139	6.23484	2.64035	up
T3_positive	MEDL00396	Chloramphenicol palmitate	Organic acid and Its derivatives	Organic acid and Its derivatives	C27H42Cl2N2O6	543.23	560.242	7.4468	[M+H-H2O]+	19.4694	3	0.6482	rp	530-43-8 | 125637-16-3	443382	-	-	-	7828.85	6790.87	4120.15	1022.5	2214.54	1348.89	2388.74	2321.1	2403.51	-	1.21311	0.040173	0.244715	-2.03082	down
T3_positive	MW0012920	1-Octadecyl Lysophosphatidic Acid	GP	PA	C21H45O6P	425.294	424.295	7.4475	[M+H]+	13.637	3	0.7591	rp	52977-29-4	12051354	HMDB0011144	45219	-	6936.97	6988.25	8572.15	5743.77	5496.01	5104.57	5787.14	5704.22	5769.79	-	1.17807	0.049737	0.7265	-0.460964	down
T3_positive	MW0049242	Deterrol stearate	Aldehyde,Ketones,Esters	Esters	C33H50O2	496.421	478.381	8.4509	[M+NH4]+	9.63769	3	0.6322	rp	52898-98-3	57473060	HMDB0034578	-	-	92796.5	88487.4	90774.2	75056.4	72458.2	78983.5	71618.6	71666.1	71644	-	1.25097	0.00430792	0.832536	-0.264416	down
T3_positive	MW0108071	Lysylproline	Amino acid and Its metabolites	Small Peptide	C11H21N3O3	226.155	243.158	1.3467	[M+H-H2O]+	0.555977	3	0.7753	rp	52766-27-5	171204	HMDB0028959	-	-	639	481.6	1571.7	9855.82	12803	13743.4	6587.33	6574.96	6691.84	-	1.26594	0.006914	13.5209	3.75712	up
T3_positive	MW0061075	Permethrin	FA	Others	C21H20Cl2O3	355.07	390.079	7.1808	[M+H-2H2O]+	13.1074	3	0.7454	rp	52645-53-1	40326	HMDB0015604	-	C14388	9662.62	8834.72	10128.5	3620.42	5232.24	4206.47	11140.5	12924.9	12511.6	-	1.26353	0.00123348	0.4562	-1.13226	down
T3_positive	MW0009282	Osalmid	Others	Medicine	C13H11NO3	252.072	229.074	2.3405	[M+Na]+	24.1048	3	0.7122	rp	526-18-1	4602	HMDB0003156	-	-	10245.2	10781.9	8041.31	36367.2	37277.2	35649.7	21686.8	21641.7	21847.6	-	1.29972	7.16013e-05	3.75989	1.91069	up
T3_positive	MW0169356	Kinetin	Hormones and hormone related compounds	Hormones and hormone related compounds	C10H9N5O	233.113	215.081	1.4112	[M+NH4]+	6.21313	3	0.6749	rp	525-79-1	3830	HMDB0012245	-	C08272	2206.36	2527.38	1756.94	8332.1	6686.53	8013.53	4159.13	4202.18	4204.71	-	1.28817	0.00301906	3.5485	1.82721	up
T3_positive	MW0054714	Medroxyprogesterone	Hormones and hormone related compounds	Hormones and hormone related compounds	C22H32O3	345.238	344.235	7.3432	[M+H]+	9.61818	2	0.8992	rp	520-85-4	10631	HMDB0001939	1094	C07119	9648.35	10898.9	11047.6	4041.55	6492.62	4777.9	11185.8	10897.6	11145.4	-	1.22513	0.00575878	0.484638	-1.04502	down
T3_positive	MW0009819	Sulochrin	Benzene and substituted derivatives	Benzene and substituted derivatives	C17H16O7	355.07	332.09	7.6541	[M+Na]+	21.6336	3	0.589	rp	519-57-3	160505	-	-	C00495	11293.3	10546.6	13904.7	5897.86	8072.89	2731.37	16926	19036	18631.9	-	1.03646	0.0336395	0.467262	-1.0977	down
T3_positive	MEDP1899	Benzoylecgonine	Benzene and substituted derivatives	Benzene and substituted derivatives	C16H19NO4	290.147	289.131	2.6248	[M+H]+	22.0078	3	0.7909	rp	519-09-5	448223	HMDB0041836	-	-	3828.87	3893.58	3368.36	9593.12	7325.82	7264.38	4780.84	4721.5	4724.29	-	1.26981	0.025146	2.18048	1.12465	up
T3_positive	MW0115288	Acetonitrile, ((2S,3R,4S,6R)-6-(beta-D-glucopyranosyloxy)-2-hydroxy-3,4-dimethoxycyclohexylidene)-, (2Z)-	Carbohydrates and Its metabolites	Carbohydrates and Its metabolites	C16H25NO9	393.187	375.153	2.0407	[M+NH4]+	0.850235	3	0.7637	rp	51771-52-9	6437384	HMDB0030394	-	-	1929.81	1914.75	1036.53	3563.06	2812.1	2932.26	2397.31	2391.65	2451.76	-	1.10469	0.0190274	1.90683	0.931178	up
T3_positive	MW0138965	Milbemycin A3	Heterocyclic compounds	Heterocyclic compounds	C31H44O7	529.309	528.309	6.9304	[M+H]+	20.6049	3	0.7002	rp	51596-10-2 | 51570-36-6	9828343	-	-	C18557	19202	15677.4	25654.6	54724.3	59306.6	57620.1	49473.2	49933.1	49903.9	-	1.26558	0.00190882	2.83562	1.50366	up
T3_positive	MW0017222	Citroxanthin	Heterocyclic compounds	Heterocyclic compounds	C40H56O	570.457	552.433	7.9728	[M+NH4]+	17.2247	3	0.6749	rp	515-06-0	5281246	HMDB0036869	-	C08605	255851	241352	244848	173938	151627	168059	188206	187870	188208	-	1.2797	0.00101461	0.665215	-0.588107	down
T3_positive	MW0052424	Diosgenin	Heterocyclic compounds	Heterocyclic compounds	C27H42O3	459.281	414.313	7.9606	[M-H+2Na]+	7.83828	3	0.7813	rp	512-04-9	99474	-	43646	C08898	14966.1	16767.4	19509.7	3163.57	5661.03	6782.86	12376.1	11872.2	12201.5	-	1.22218	0.00257804	0.304577	-1.71512	down
T3_positive	MW0110348	L-Lysine, L-valyl-L-histidyl-	Amino acid and Its metabolites	Small Peptide	C17H30N6O4	383.24	382.233	8.1558	[M+H]+	4.90178	2	0.9383	rp	510727-21-6	10114375	-	23511	-	8397.47	8741.4	7796.9	4177.81	3993.04	4810.4	4692.09	4809.63	4800.11	-	1.28571	0.0004516	0.520587	-0.941787	down
T3_positive	MEDP1170	9-Octadecenal	Aldehyde,Ketones,Esters	Aldehydes	C18H34O	267.268	266.261	7.137	[M+H]+	0.58829	2	0.8156	rp	5090-41-5	5283381	HMDB0030965	-	-	44320	41799.9	48567.9	19804.2	32182.9	25347.8	30171	29883.1	30163.8	-	1.17142	0.0169961	0.574179	-0.800428	down
T3_positive	MW0125192	Mitraphylline	Heterocyclic compounds	Heterocyclic compounds	C21H24N2O4	369.182	368.174	3.9388	[M+H]+	5.46698	2	0.9354	rp	509-80-8	94160	-	-	C09227	590.09	475.85	566.99	1987.88	1835.49	1800.76	1174.14	1179.6	1174.25	-	1.30339	0.000153116	3.4442	1.78417	up
T3_positive	MW0140518	(E) 9-octadecen-1-ol	Others	Others	C18H36O	286.31	268.277	6.1577	[M+NH4]+	2.93566	3	0.7081	rp	506-42-3	5367665	-	263621	-	26083	26051.9	24397.7	23107.3	19824.8	18909.8	22968	23304.1	22992.8	-	1.1256	0.0449261	0.808045	-0.307492	down
T3_positive	MW0055293	Nervonic acid	FA	FFA	C24H46O2	331.34	366.35	6.6606	[M+H-2H2O]+	10.9154	3	0.7702	rp	506-37-6	5281120	HMDB0002368	262	C08323	12926.7	15166.2	11168.5	7550.05	6381.4	5016.88	20754.8	20753.1	20538.1	ko01040	1.21718	0.0118951	0.48262	-1.05104	down
T3_positive	MEDP1589	Theonylleucine	Amino acid and Its metabolites	Small Peptide	C10H20N2O4	233.149	232.142	1.9376	[M+H]+	0.453268	2	0.8651	rp	50299-12-2	7021827	HMDB0029065	-	-	1504.58	866.95	969.92	14139.1	13087.3	11614.5	6342.42	6338.76	6323.42	-	1.2988	0.00224856	11.624	3.53903	up
T3_positive	MW0106487	Djenkolic acid	Organic acid and Its derivatives	Organic acid and Its derivatives	C7H14N2O4S2	272.066	254.04	1.1037	[M+NH4]+	19.9179	3	0.6503	rp	498-59-9	68134	-	-	C08275	899.88	1439.07	7548.35	19693.5	27599.9	28268.4	19081	19268.9	19622.5	-	1.15684	0.00400203	7.64231	2.93401	up
T3_positive	MEDP0437	Ergothioneine	Organic acid and Its derivatives	Organic acid and Its derivatives	C9H15N3O2S	230.096	229.089	0.8489	[M+H]+	0.66001	2	0.9551	rp	497-30-3	5351619	HMDB0003045	53	C05570	42488.9	30808.4	31001.3	162200	131679	124152	72835.7	69494.2	65736.8	ko00340,ko01100	1.28907	0.00715824	4.00802	2.00289	up
T3_positive	MW0163338	L-2-amino-4-(aminooxy)butyrate	Others	Others	C4H10N2O3	176.103	134.069	0.7807	[M+CH3CN+H]+	0.4	2	0.9667	rp	496-93-5	25246035	-	-	-	7373.53	7502.43	1249.62	13769.8	20268.2	23229.4	16637.2	16643.1	16478.5	-	1.01764	0.0197467	3.55134	1.82836	up
T3_positive	MW0002155	2,3-Dihydrobenzofuran	Benzene and substituted derivatives	Benzene and substituted derivatives	C8H8O	103.053	120.058	2.1047	[M+H-H2O]+	2.08229	2	0.8223	rp	496-16-2	10329	HMDB0013815	-	-	6175.65	6674.6	6449.99	18373.2	16814.8	16593.5	10631.1	10635.5	10617.5	-	1.3083	0.00157113	2.68295	1.42382	up
T3_positive	MW0126762	Thiamine phosphoric acid ester	Organic acid and Its derivatives	Organic acid and Its derivatives	C12H17N4O4PS	362.099	344.071	1.0892	[M+NH4]+	14.2305	3	0.7215	rp	495-23-8	3382778	HMDB0002666	-	-	13299.8	9610.34	14281.1	41231.9	48197	48553.7	25971.8	27408.4	27376.5	-	1.28591	0.000800625	3.71008	1.89145	up
T3_positive	MW0063575	Smilagenin acetate	Terpenoids	Triterpene	C29H46O4	459.356	458.34	8.3989	[M+H]+	12.4494	3	0.8823	rp	4947-75-5 | 35319-91-6	225766	-	43697	-	12098.3	10407	10854.3	9055.71	9820.61	8252	8912.36	9116.18	9101.64	-	1.10326	0.0383061	0.813207	-0.298305	down
T3_positive	MW0124076	Eugenitol	Heterocyclic compounds	Heterocyclic compounds	C11H10O4	245.017	206.058	0.5599	[M+K]+	11.3638	3	0.6245	rp	491-48-5	5036604	HMDB0029466	-	-	163.91	579.29	13.3	1268.01	2640.69	2626.91	1265.23	1206.24	1339.88	-	1.03867	0.0386039	8.63927	3.11091	up
T3_positive	MW0114734	L-Iditol	Alcohol and amines	Alcohols	C6H14O6	165.075	182.079	0.7977	[M+H-H2O]+	1.1	2	0.9201	rp	488-45-9	5460044	HMDB0011632	-	C01507	70022.2	64464.1	58565.8	49626.7	36892.2	44205.2	44238.1	44053	43932.3	-	1.16528	0.0141204	0.677144	-0.562465	down
T3_positive	MW0124466	Isoeugenitol	Heterocyclic compounds	Heterocyclic compounds	C11H10O4	207.06	206.058	1.9155	[M+H]+	15.0616	3	0.6928	rp	479-06-1	5318562	HMDB0029472	-	-	563.33	79.69	247.19	6839.97	6571.1	5883.14	3306.71	3332.94	3327	-	1.24279	0.00034976	21.6738	4.43788	up
T3_positive	MEDN0844	Stachyose	Carbohydrates and Its metabolites	Sugars	C24H42O21	689.211	666.222	1.2072	[M+Na]+	0.174949	2	0.9606	rp	470-55-3	439531	HMDB0003553	6951	C01613	40686.7	21998.6	63685.8	171748	234443	195592	107842	108578	109120	ko00052,ko01100	1.22116	0.00329851	4.76202	2.25157	up
T3_positive	MEDP1836	Nootkatone	Aldehyde,Ketones,Esters	Ketones	C15H22O	219.174	218.167	6.6801	[M+H]+	2.39664	1a	0.9112	rp	4674-50-4 | 28834-25-5	1268142	-	-	C17914	20827.3	19362.6	21980.7	18381.3	17062.1	16215.7	18131.2	17822.7	17841.7	-	1.14472	0.0249926	0.830926	-0.267209	down
T3_positive	MW0169587	Oleandrin	Others	Others	C32H48O9	576.332	576.33	7.765	[M+]+	5.44999	3	0.5971	rp	465-16-7	11541511	-	44218	C19987	200311	212129	155019	128323	122070	108249	96524.6	95706	96547.6	-	1.18268	0.0453447	0.632012	-0.661976	down
T3_positive	MEDN0230	Lactulose	Carbohydrates and Its metabolites	Sugars	C12H22O11	307.096	342.116	2.704	[M+H-2H2O]+	12.6882	3	0.5855	rp	4618-18-2	11333	HMDB0000740	-	-	515.7	479.36	246.57	3606.22	3355.59	2922.76	1562.85	1230.94	1421.76	-	1.27893	0.00156573	7.96096	2.99294	up
T3_positive	MEDN0428	N6-Succinyl Adenosine	Nucleotide and Its metabolites	Nucleotide and Its metabolites	C14H17N5O8	428.079	383.108	2.3518	[M-H+2Na]+	0.0233602	2	0.9584	rp	4542-23-8	20849086	HMDB0000912	-	-	3049.48	3109.13	2840.66	7513.79	8500.69	8000.77	5548.42	5568.6	5583.48	-	1.30593	0.00174703	2.66858	1.41607	up
T3_positive	MW0015867	Arachidonoyl-N,N-dimethyl amide	FA	Others	C22H37NO	332.294	331.288	8.5723	[M+H]+	1.40845	2	0.9229	rp	45280-17-9	5283408	-	36695	-	1456.29	2120.7	1954.04	934.55	509.1	777.76	1011.27	930.87	1011.35	-	1.18953	0.0142657	0.401627	-1.31607	down
T3_positive	MW0138239	Genistein	Flavonoids	Isoflavones	C15H10O5	271.06	270.053	5.2718	[M+H]+	1.78101	2	0.9521	rp	446-72-0	5280961	HMDB0003217	3398	C06563	784.51	632.02	354.83	4543.35	5080.2	3660.7	2344.32	2346.15	2322.32	ko01100,ko01110	1.27271	0.00720348	7.49946	2.90679	up
T3_positive	MW0111217	N-Methyldioctylamine	Alcohol and amines	Amines	C17H37N	256.3	255.293	6.4314	[M+H]+	0.48806	3	0.8943	rp	4455-26-9	78202	-	103466	-	4196.68	5418.02	4528.66	2136.03	3082.24	2212.88	1766.75	1789.97	1723.59	-	1.21002	0.00994695	0.525416	-0.928468	down
T3_positive	MW0106972	Glu-Met	Amino acid and Its metabolites	Small Peptide	C10H18N2O5S	279.111	278.094	1.5663	[M+H]+	23.887	3	0.6772	rp	4423-22-7	6426949	HMDB0028825	23687	-	30539.7	28575.4	31672	24770.5	23150	21210.5	6552.65	7207.43	4629.02	-	1.2201	0.00650556	0.761462	-0.393156	down
T3_positive	MW0113020	4-Aminobutyraldehyde	Aldehyde,Ketones,Esters	Aldehydes	C4H9NO	134.08	87.0684	0.7637	[M+HCOO+2H]+	1.9	3	0.8945	rp	4390-05-0	118	HMDB0001080	3225	C02903	3481.81	2973.51	4265.63	7927.21	8144.64	6075.3	7772.89	7453.5	8028.18	-	1.22329	0.0130745	2.06578	1.04669	up
T3_positive	MW0010102	2-Cyclohexyl-2-hydroxy-2-phenylacetic acid	Benzene and substituted derivatives	Benzene and substituted derivatives	C14H18O3	257.113	234.126	1.9727	[M+Na]+	5.54282	3	0.7473	rp	4335-77-7 | 50896-04-3	97700	-	1688	-	651.08	1052.43	874.46	8147.27	7438.08	7660.77	4931.02	5117.48	5082.93	-	1.30159	6.81595e-05	9.01722	3.17268	up
T3_positive	MW0107567	Ile-Ile	Amino acid and Its metabolites	Small Peptide	C12H24N2O3	245.186	244.179	2.8332	[M+H]+	0.975	3	0.7462	rp	42537-99-5	7010568	HMDB0028910	23681	-	338.3	393.88	90.05	12569.7	9376.98	12898.5	5660.33	5728.54	5730.65	-	1.27487	0.00929153	42.3788	5.40527	up
T3_positive	MW0141052	1,1'-Dihydroxy-1,1',2,2'-tetrahydrolycopene	Others	Hydrocarbon derivatives	C40H60O2	572.464	572.459	7.9829	[M+]+	10.9196	3	0.7053	rp	4212-57-1	14502754	-	-	C19894	15562.6	14618	14048.5	9779.16	8259.3	8257.97	10365.6	10110.2	10070.7	-	1.27347	0.000961905	0.59455	-0.75013	down
T3_positive	MW0107019	Glutamylproline	Amino acid and Its metabolites	Small Peptide	C10H16N2O5	291.12	244.106	1.6236	[M+HCOO+2H]+	4.325	3	0.7084	rp	41745-47-5	11218768	HMDB0028827	-	-	382.13	161.53	137.39	7295.2	4817.78	6302.24	2608.63	2681.02	2650.74	-	1.28715	0.0137017	27.0395	4.75699	up
T3_positive	MW0141412	15(R)-17-Phenyl trinor prostaglandin F2alpha	Hormones and hormone related compounds	Hormones and hormone related compounds	C23H32O5	371.228	388.225	8.3642	[M+H-H2O]+	19.8181	3	0.5547	rp	41639-71-8	5311235	-	45710	-	15314.9	13918.7	17466.8	11198	10915.7	10232.8	14286.8	14983.7	14938.2	-	1.22214	0.0356129	0.692639	-0.529824	down
T3_positive	MW0106117	Unii-BG3F62ond5	Organic acid and Its derivatives	Organic acid and Its derivatives	C6H12N2O4Pt	412.024	371.045	1.4993	[M+K]+	0.28213	3	0.7303	rp	41575-94-4	10339178	HMDB0015093	-	-	1735.63	1279.35	1406.1	2872.44	3179.6	4036.18	3305.58	3321.52	3308.16	-	1.2468	0.0209989	2.28185	1.1902	up
T3_positive	MW0106559	D-Pyroglutamic acid	Amino acid and Its metabolites	Amino acids	C5H7NO3	130.049	129.043	0.7807	[M+H]+	0.78598	2	0.9636	rp	4042-36-8	439685	HMDB0000805	63632	C02237	632791	710007	573271	423964	373466	436283	473416	469287	471759	ko00470,ko01100	1.23409	0.0153522	0.643877	-0.635142	down
T3_positive	MW0159293	Val-Phe	Amino acid and Its metabolites	Small Peptide	C14H20N2O3	265.154	264.147	2.6743	[M+H]+	0.325416	3	0.8791	rp	3918-92-1	6993120	HMDB0029134	65002	-	880.83	485.64	643.2	7375.37	7264.51	7286.3	3022	2853.55	2972.64	-	1.29906	0.000103478	10.9103	3.44762	up
T3_positive	MW0017183	Guggulsterone	CoEnzyme and vitamins	CoEnzyme and vitamins	C21H28O2	313.212	312.209	8.2797	[M+H]+	13.1944	2	0.8107	rp	39025-23-5 | 95975-55-6	6450278	-	-	-	268.34	246.88	864.34	9359.98	16762.8	11719.5	6359.76	6360.29	6247.54	-	1.27095	0.0298828	27.4308	4.77772	up
T3_positive	MW0012677	17alpha-Hydroxypregnenolone	Aldehyde,Ketones,Esters	Ketones	C21H32O3	447.117	332.235	7.5676	[M-2H+3K]+	15.9916	3	0.5427	rp	387-79-1	91451	HMDB0000363	5352	C05138	5656.13	6901.8	7236.59	18023.8	16422.7	19942.1	24022.8	25093.8	25331.5	ko01100	1.29094	0.00246107	2.74766	1.4582	up
T3_positive	MW0013009	2-azaniumylethyl (2R)-2-[(9Z)-octadec-9-enoyloxy]-3-(stearoyloxy)propyl phosphate	GP	PE	C41H80NO8P	746.563	745.562	7.9139	[M+H]+	14.383	3	0.7221	rp	383907-18-4	46891779	HMDB0008993	-	C00350	53840.1	52830	50729.1	33938.6	36530	35131.8	40022.1	39920.6	39887.8	ko00563,ko00564,ko01100,ko01110,ko04136,ko04138	1.30076	0.000164429	0.670908	-0.575813	down
T3_positive	MW0154982	Penitrem C	Heterocyclic compounds	Heterocyclic compounds	C37H44ClNO4	602.296	601.296	7.9038	[M+H]+	9.21746	3	0.5859	rp	37318-84-6	119470	-	-	-	3446.9	3039.04	7000.11	18220.6	29173.9	31483.8	13324.3	13994	13463.1	-	1.2401	0.0252152	5.84889	2.54816	up
T3_positive	MW0103528	Dephospho-CoA	CoEnzyme and vitamins	CoEnzyme and vitamins	C21H35N7O13P2S	688.157	687.149	2.7406	[M+H]+	0.465011	2	0.9905	rp	3633-59-8	439335	HMDB0001373	-	-	50570.4	49167.5	61990.3	148065	122378	132714	79753.3	79554.5	79646.4	-	1.28771	0.0022098	2.49281	1.31777	up
T3_positive	MW0109584	Saxagliptin	Heterocyclic compounds	Heterocyclic compounds	C18H25N3O2	316.197	315.195	1.9727	[M+H]+	15.1303	3	0.6806	rp	361442-04-8	11243969	HMDB0015634	-	-	868.89	222.05	140.92	4855.7	3826.57	4269.09	1808.18	1697.69	1648.35	-	1.21258	0.000666829	10.5137	3.39419	up
T3_positive	MW0123412	Colupdox a	Amino acid and Its metabolites	Small Peptide	C25H36O6	415.255	432.251	7.9657	[M+H-H2O]+	17.0276	3	0.7094	rp	35923-67-2	90471746	HMDB0039597	-	-	26345.7	28476.5	30825.4	17663.3	20809.8	19680.3	21419.3	21643	21529	-	1.24367	0.00608505	0.678985	-0.558549	down
T3_positive	MW0119397	3-Amino-5-(3-thiophenyl)-2-thiophenecarboxamide	Alcohol and amines	Amines	C9H8N2OS2	247.004	224.008	0.6256	[M+Na]+	19.4117	3	0.6504	rp	354812-17-2	2807869	-	45240	-	22127	19547.8	16955.1	55734.6	41674.8	53412.7	34246.1	33738.6	32771.2	-	1.27411	0.0123256	2.57244	1.36314	up
T3_positive	MEDP1339	LPC(18:1/0:0)	GP	LPC	C26H52NO7P	522.356	521.356	7.2231	[M+H]+	3.66692	1a	0.9327	rp	3542-29-8	53480465	HMDB0010385	-	C00157	1.24867e+06	737597	1.01778e+06	9.45271e+06	4.83556e+06	7.98629e+06	3.87392e+06	3.8567e+06	3.85617e+06	ko00564,ko00590,ko00592,ko01100,ko01110	1.27354	0.0407353	7.41487	2.89042	up
T3_positive	MW0154102	Braco-19	Alcohol and amines	Amines	C35H43N7O2	594.349	593.348	3.3071	[M+H]+	5.29844	3	0.636	rp	351351-75-2	9808666	-	-	C20202	757.98	1684.22	610.93	5758.08	6089.05	4149.03	3053.84	3061.79	2993.91	-	1.2259	0.00707786	5.23927	2.38936	up
T3_positive	MW0106076	3-(Methylthio)-2-butanone O-((methylamino)carbonyl)oxime	Aldehyde,Ketones,Esters	Esters	C7H14N2O2S	191.091	190.078	4.2715	[M+H]+	13.8792	3	0.7575	rp	34681-10-2	5360962	-	-	C18645	9427.15	9696.1	9264.97	8651.43	8716.33	8426.34	6041.24	6018.7	6163.65	-	1.23968	0.00676387	0.90862	-0.138251	down
T3_positive	MW0120569	Urocanic acid	Organic acid and Its derivatives	Organic acid and Its derivatives	C6H6N2O2	156.084	138.043	1.8441	[M+NH4]+	18.6202	3	0.6612	rp	3465-72-3	736715	HMDB0000301	298	C00785	5802.98	5409.12	4392.28	7810.23	6988.02	7004.3	5595.33	5544.27	5527.78	ko00340,ko01100	1.15689	0.0198999	1.39721	0.482546	up
T3_positive	MW0015544	acetyl Podocarpic acid anhydride	Aldehyde,Ketones,Esters	Ketones	C38H46O7	637.315	614.324	3.4648	[M+Na]+	0.109181	3	0.7359	rp	344327-48-6	9830426	-	45069	-	5729.58	9321.49	6222.1	32525.5	20480.4	23974.7	13648.6	13553.1	13612.5	-	1.25349	0.0264472	3.61867	1.85546	up
T3_positive	MW0169873	Spirilloxanthin	Terpenoids	Tetraterpenes	C42H60O2	614.484	596.459	7.9657	[M+NH4]+	15.4282	3	0.6978	rp	34255-08-8	5366506	-	-	C15881	204202	189525	191917	137439	126635	136108	151409	151370	150610	ko01100,ko01110	1.28959	0.000602717	0.683321	-0.549365	down
T3_positive	MW0107023	Glu-Tyr	Amino acid and Its metabolites	Small Peptide	C14H18N2O6	349.073	310.116	3.3772	[M+K]+	18.1807	3	0.5385	rp	3422-39-7	515717	HMDB0028831	23927	-	11582.4	12742.8	10043.9	15469.1	15425	14471.1	12825.6	12725.9	12703	-	1.16613	0.0286439	1.31994	0.400472	up
T3_positive	MW0016971	Celastrol	Benzene and substituted derivatives	Benzene and substituted derivatives	C29H38O4	473.264	450.277	6.5587	[M+Na]+	3.84422	3	0.7736	rp	34157-83-0	122724	HMDB0002385	-	-	68834.4	73525.9	66831.9	61904.4	56573	59003	56046.4	55285	56089.4	-	1.18619	0.015409	0.848408	-0.237171	down
T3_positive	MEDP1095	Glycine dehydrocholic acid	Bile acids	Bile acids	C26H37NO6	460.27	459.262	6.5551	[M+H]+	0.864232	3	0.5278	rp	3415-45-0	13955640	-	-	-	1.14049e+06	1.05151e+06	979262	909963	793287	814889	643498	644554	648670	-	1.15799	0.0232801	0.794051	-0.332696	down
T3_positive	MW0157089	L-alpha-Glycerophosphorylethanolamine	GP	PE	C5H14NO6P	279.076	215.056	5.8772	[M+CH3CN+Na]+	11.825	3	0.6322	rp	33049-08-0	444183	HMDB0000114	-	C01233	327.5	170.25	399.35	3660.17	2711.95	2746.68	712.52	963.34	703.39	ko00564,ko00565,ko01100	1.27854	0.00992659	10.1648	3.3455	up
T3_positive	MW0125873	Nomifensine maleate	Benzene and substituted derivatives	Benzene and substituted derivatives	C20H22N2O4	239.149	354.158	7.9884	[M+H]+	12.0326	3	0.7118	rp	32795-47-4 | 24524-90-1	5358907	-	44345	-	38203.3	41396	44865.2	28499.1	20958.3	26101.1	32567.5	32477.8	32478.7	-	1.21243	0.00550143	0.607069	-0.720067	down
T3_positive	pme2617	L-methionine sulfoxide	Amino acid and Its metabolites	Amino acid derivatives	C5H11NO3S	165.05	165.046	0.5729	[M+]+	10.8877	3	0.7995	rp	3226-65-1	158980	HMDB0002005	6428	C02989	5422.95	4035.32	3981.63	8245.59	8069.05	8721.16	6502.19	6574.54	6576.87	ko00270,ko01100	1.24741	0.00714173	1.8628	0.89747	up
T3_positive	MW0004115	4-Methoxytyramine	Benzene and substituted derivatives	Phenolics	C9H13NO2	206.067	167.095	1.9155	[M+K]+	23.7192	3	0.626	rp	3213-30-7	1748	HMDB0012162	-	-	641.77	585.7	213.31	13184.2	11989.5	11474.1	6023.25	6102.16	6011.46	-	1.28343	0.00100942	25.436	4.6688	up
T3_positive	MW0107952	L-selenomethionine	Amino acid and Its metabolites	Amino acids	C5H11NO2Se	198.007	196.995	1.5019	[M+H]+	9.975	3	0.7231	rp	3211-76-5	105024	HMDB0003966	-	C05335	1137.69	1395.57	1478.29	2334.89	2623.38	2908.39	2031.79	2024.1	2089.06	ko00450,ko01100	1.25619	0.00504552	1.961	0.971591	up
T3_positive	MW0103633	Nicotinate mononucleotide	Nucleotide and Its metabolites	Nucleotide and Its metabolites	C11H15NO9P+	336.049	336.048	0.8591	[M+H]+	1.02018	2	0.9541	rp	321-02-8	121992	HMDB0001132	-	C01185	79192.8	65361.3	55311.6	39738.3	28533.7	23299.7	46773	45211	44903.7	ko00760,ko01100,ko01240	1.1863	0.0163655	0.458166	-1.12606	down
T3_positive	MW0169424	Ornithine	Amino acid and Its metabolites	Amino acids	C5H12N2O2	155.081	132.09	1.8441	[M+Na]+	4.95372	3	0.7301	rp	3184-13-2	6262	HMDB0000214	27	C00077	103409	102186	85019.8	136662	127324	130388	99768.2	99513.5	99667.7	ko00220,ko00330,ko00470,ko00480,ko01100,ko01110,ko01210,ko01230,ko02010	1.20542	0.0154113	1.35703	0.440449	up
T3_positive	MW0151977	2-Methyl-1-pentyl-3-(4-methoxynaphthoyl)indole	Aldehyde,Ketones,Esters	Ketones	C26H27NO2	403.232	385.204	7.4338	[M+NH4]+	14.7753	3	0.6111	rp	316189-74-9	45272116	-	-	-	25879.1	27961.2	27892.9	21576.9	21862.7	22736.9	24519	24167.2	24215.3	-	1.26207	0.00676713	0.809664	-0.304605	down
T3_positive	MW0063776	Testosterone enanthate	Hormones and hormone related compounds	Hormones and hormone related compounds	C26H40O3	401.313	400.298	8.0176	[M+H]+	22.3129	3	0.7283	rp	315-37-7	9416	HMDB0005814	-	C08157	28980.3	25110.1	25324.7	20658.8	21607.2	21750.9	21149	20833.9	21121.8	-	1.19255	0.0466463	0.806105	-0.31096	down
T3_positive	MW0116773	1-[1-(4-fluorophenyl)-2,5-dimethyl-1H-pyrrol-3-yl]-2-(pyrrolidin-1-yl)ethan-1-one	Aldehyde,Ketones,Esters	Ketones	C18H21FN2O	265.154	300.164	1.7716	[M+H-2H2O]+	6.87478	3	0.7464	rp	314245-33-5	675434	-	64772	-	492.32	1178.66	169.47	3692.88	2409.17	2720.8	1749.54	1728.69	1774.69	-	1.11265	0.0103206	4.79385	2.26119	up
T3_positive	MW0113885	Aloesin	Heterocyclic compounds	Heterocyclic compounds	C19H22O9	359.104	394.126	2.6921	[M+H-2H2O]+	24.5076	3	0.5792	rp	30861-27-9	160190	-	-	C08994 | C15539	19857.3	23399.9	22634.8	51716.2	64486.9	56360.4	34009.9	34151.8	34255	-	1.29236	0.00706806	2.61888	1.38895	up
T3_positive	MW0007841	Monoisobutyl phthalate	Aldehyde,Ketones,Esters	Esters	C12H14O4	205.086	222.089	7.247	[M+H-H2O]+	0.122625	2	0.8819	rp	30833-53-5	92272	HMDB0002056	-	-	715377	680533	648618	338826	476794	414139	520487	526986	523345	-	1.22199	0.00975516	0.601488	-0.733392	down
T3_positive	MW0146359	(S)-2-((S)-2-Amino-3-carboxypropanamido)-4-methylpentanoic acid	Amino acid and Its metabolites	Amino acid derivatives	C10H18N2O5	310.139	246.122	1.4497	[M+CH3CN+Na]+	3.575	3	0.7784	rp	3062-14-4	6992367	HMDB0028757	-	-	248.42	299.97	205.53	1194.5	1836.89	1478.69	807.36	891.39	912.4	-	1.28884	0.0195232	5.98217	2.58067	up
T3_positive	mws4176	Alanylphenylalanine	Amino acid and Its metabolites	Small Peptide	C12H16N2O3	237.123	236.116	2.3209	[M+H]+	1.89002	2	0.9337	rp	3061-90-3	96814	HMDB0028694	23975	-	799.8	1089.08	780.87	6632.37	4981.49	5748.62	3533.67	3379.6	3472.1	-	1.29945	0.00732159	6.50341	2.7012	up
T3_positive	MW0105485	Ala-Tyr	Amino acid and Its metabolites	Small Peptide	C12H16N2O4	253.118	252.111	1.4446	[M+H]+	4.97425	2	0.8709	rp	3061-88-9	92946	HMDB0028699	-	-	701.4	733.75	1101.67	5373.5	5959.33	4370.87	2104.71	2027.58	2128.96	-	1.2895	0.00740599	6.19031	2.63001	up
T3_positive	MW0063243	Pyrohyperforin	Terpenoids	Terpenoids	C35H50O4	517.371	534.371	7.6714	[M+H-H2O]+	9.97474	3	0.6517	rp	303115-46-0	73808497	HMDB0035899	-	-	70098.3	61573.1	60100	46724.7	51656.9	50277.3	47719.2	47298.8	47643.6	-	1.20027	0.027767	0.775188	-0.367382	down
T3_positive	MW0053990	Pregn-4-ene-3,20-dione, 17-(acetyloxy)-	Aldehyde,Ketones,Esters	Esters	C23H32O4	395.215	372.23	8.295	[M+Na]+	17.0557	3	0.7156	rp	302-23-8 | 17308-02-0	10156152	-	1093	-	64.97	128.81	273.05	1213.03	1595.12	1349.75	595.32	654.47	624.88	-	1.23406	0.00203424	8.90667	3.15489	up
T3_positive	MW0139607	Rottlerin	Heterocyclic compounds	Heterocyclic compounds	C30H28O8	539.164	516.178	7.4468	[M+Na]+	5.51944	3	0.6081	rp	30169	5281847	-	-	-	960.39	1100.95	907.1	560.57	593.3	434.17	6839.78	8637.71	9088.96	-	1.2383	0.00403158	0.534975	-0.902458	down
T3_positive	MW0103660	S-adenosylmethionine	Nucleotide and Its metabolites	Nucleotide and Its metabolites	C15H22N6O5S	399.145	398.137	0.7637	[M+H]+	2.14842	2	0.9601	rp	29908-03-0 | 17176-17-9 | 485-80-3 | 78548-84-2 | 91279-78-6	34755	HMDB0001185	3289	C00019	308211	207944	289532	822901	776737	927925	718273	725268	720085	ko00261,ko00270,ko00330,ko00999,ko01100,ko01110,ko01230,ko01240,ko04122	1.27932	0.000831083	3.13715	1.64946	up
T3_positive	MW0105468	Ala-ile	Amino acid and Its metabolites	Small Peptide	C9H18N2O3	203.139	202.132	1.9376	[M+H]+	0.85	3	0.7275	rp	29727-65-9	7408079	-	23844	-	1502.42	2187.01	951.14	9553	7645.58	8063.32	5800.41	5975.86	6316.83	-	1.26192	0.00129944	5.44371	2.44459	up
T3_positive	MEDL02667	Perlolyrine	Alkaloids	Alkaloids	C16H12N2O2	265.097	264.09	4.1317	[M+H]+	0.229523	2	0.8144	rp	29700-20-7	160179	HMDB0030327	-	C09231	6191.68	8531.15	5977.64	61078.5	61341.9	57522	29793.4	29845.3	29766.3	-	1.3047	1.35928e-05	8.69268	3.1198	up
T3_positive	FDATP00260	Adenine hydrochloride	Others	Medicine	C5H6ClN5	136.061	171.031	1.3468	[M+H]+	0.834066	2	0.9493	rp	2922-28-3 | 22177-51-1	76219	-	-	-	51367.7	54608.8	58599	100900	94724	106044	96847.2	94761.3	96720.8	-	1.29543	0.000713344	1.833	0.874211	up
T3_positive	MW0155693	Prednimustine	Hormones and hormone related compounds	Hormones and hormone related compounds	C35H45Cl2NO6	646.267	645.262	7.7476	[M+H]+	0.371274	3	0.6445	rp	29069-24-7	34457	-	-	C19512	16464	9348.5	26277.6	104635	104276	118496	29735.1	29447.2	29308.9	-	1.25211	0.000175027	6.28539	2.652	up
T3_positive	MW0015632	Alliosterol 1-(4''-galactosylrhamnoside) 16-galactoside	Hormones and hormone related compounds	Hormones and hormone related compounds	C45H76O18	887.483	904.503	3.4796	[M+H-H2O]+	17.9124	3	0.5422	rp	289690-79-5	74821812	HMDB0038346	-	-	326.26	355.66	210.6	15289.6	8348.38	10115.6	4294.69	4311.85	4248.23	-	1.3014	0.0342499	37.8182	5.24101	up
T3_positive	MW0114318	Atrinositol	Organic acid and Its derivatives	Organic acid and Its derivatives	C6H15O15P3	420.971	419.962	8.7812	[M+H]+	2.22304	3	0.7679	rp	28841-62-5	65762	-	45088	-	114359	104423	112071	73295.4	73176.3	91244.7	97700.9	96822.8	95569.2	-	1.18715	0.0198558	0.718496	-0.476947	down
T3_positive	MW0005990	Aloin	Benzene and substituted derivatives	Benzene and substituted derivatives	C21H22O9	401.114	418.126	3.2368	[M+H-H2O]+	21.5158	3	0.6909	rp	28371-16-6 | 8015-61-0 | 5133-19-7	14989	HMDB0035219	-	C17778	19402.5	19875.7	15470.8	52837.7	52865.4	60221.9	32465.8	32302.3	32462.3	-	1.29522	0.000722145	3.03065	1.59963	up
T3_positive	MW0063578	2-(((R)-2,3-Dihydroxypropyl)phosphoryloxy)-N,N,N-trimethylethanaminium	GP	PC	C8H21NO6P+	296.066	258.111	0.7582	[M+K]+	0.414265	2	0.9521	rp	28319-77-9	439285	HMDB0000086	-	C00670	635243	704038	468174	1.34312e+06	1.53535e+06	1.22332e+06	741383	744519	739311	ko00564,ko00565	1.2426	0.00328181	2.26937	1.18229	up
T3_positive	MW0126505	Salsolinol	Heterocyclic compounds	Heterocyclic compounds	C10H13NO2	202.086	179.095	2.9724	[M+Na]+	4.41934	3	0.6828	rp	27740-96-1	91588	HMDB0042012	-	C09642	7340.44	6560.93	7327.24	12748.7	10233.7	12071.2	8913.76	8918.67	8804.93	-	1.25795	0.0171689	1.65125	0.723555	up
T3_positive	MW0124205	Gambogic acid	Organic acid and Its derivatives	Organic acid and Its derivatives	C38H44O8	629.315	628.304	7.3733	[M+H]+	9.11827	3	0.7624	rp	2752-65-0	9852185	HMDB0034095	-	-	11058.5	10844	11833.4	35613.3	23844.2	34788.4	28202	29084.7	28075	-	1.27171	0.0328998	2.79365	1.48215	up
T3_positive	MW0102976	(3S,4aR,6aR,6bS,8aR,12aR,14R,14aR,14bS)-14-methoxy-4,4,6a,6b,8a,11,11,14b-octamethyl-1,2,3,4a,5,6,7,8,9,10,12,12a,14,14a-tetradecahydropicen-3-ol	Alcohol and amines	Alcohols	C31H52O2	439.382	456.397	8.0002	[M+H-H2O]+	13.095	3	0.6305	rp	268541-26-0	91895434	HMDB0035495	-	-	39233.4	33120.2	36296.9	21168.8	18166.2	19886.4	23114.8	23331.2	23106.9	-	1.2806	0.0039653	0.545063	-0.875506	down
T3_positive	MW0056887	1-Palmitoyl-2-oleoyl-sn-glycero-3-phosphocholine	GP	PC	C42H82NO8P	760.579	759.578	8.2776	[M+H]+	9.11585	2	0.9181	rp	26853-31-6	5497103	HMDB0007972	-	C00157	19259	20638.5	19024.1	15157.1	13491.2	10978.9	13175	13360.1	12924.2	ko00564,ko00590,ko00592,ko01100,ko01110	1.18205	0.0213608	0.672541	-0.572306	down
T3_positive	MW0000287	Omacetaxine mepesuccinate	Alkaloids	Alkaloids	C29H39NO9	546.26	545.263	2.4372	[M+H]+	9.3179	2	0.811	rp	26833-87-4	285033	-	-	-	416.54	502.95	272.69	4160	3780.16	3534.16	1469.55	1318.52	1443.26	-	1.29501	0.00101325	9.62465	3.26673	up
T3_positive	MW0055024	MG(18:2/0:0/0:0)	GL	MG	C21H38O4	355.282	354.277	8.0217	[M+H]+	6.84189	3	0.8833	rp	26545-74-4	5283469	HMDB0242115	-	C01885	198700	188314	199740	144404	150269	149233	168821	167467	168836	ko00561,ko01100	1.29595	0.00150908	0.756545	-0.402502	down
T3_positive	MW0125383	N-(3-pyridyl)-Indomethacin amide	Alcohol and amines	Amines	C24H20ClN3O3	434.123	433.119	2.196	[M+H]+	9.10812	3	0.7343	rp	261766-29-4	4434869	-	63050	-	24002	27726.5	22527.2	45159	44124.9	40158.2	30558.8	30562.8	30613.1	-	1.27108	0.00106561	1.7432	0.801735	up
T3_positive	MW0114590	Hexaethylene glycol	Alcohol and amines	Alcohols	C12H26O7	300.202	282.168	2.7804	[M+NH4]+	2.76028	3	0.7402	rp	2615-15-8	17472	HMDB0061822	-	-	1815.32	1743.69	1338.9	550.62	1102.55	401.89	1340.29	1341.45	1318.88	-	1.10103	0.0264983	0.419579	-1.25299	down
T3_positive	MW0108877	N-oleoylglycine	Amino acid and Its metabolites	Amino acid derivatives	C20H37NO3	340.293	339.277	7.0681	[M+H]+	18.2698	2	0.8214	rp	2601-90-3	6436908	HMDB0013631	-	-	38050.2	35517	44461.5	236650	158556	219930	117964	117998	116643	-	1.29493	0.0188752	5.21175	2.38177	up
T3_positive	MW0112273	2-Phosphoglyceric acid	Organic acid and Its derivatives	Organic acid and Its derivatives	C3H7O7P	230.958	185.993	0.9515	[M-H+2Na]+	14.35	3	0.8517	rp	2553-59-5	59	HMDB0000362	-	-	23344.6	24716.4	21315.6	12912	11722.4	13571.3	12654.7	12637.8	12518.7	-	1.28432	0.00235602	0.550701	-0.860658	down
T3_positive	MEDP1307	(2S,3S)-2-amino-3-phenylbutanoic acid	Amino acid and Its metabolites	Amino acid derivatives	C10H13NO2	180.102	179.095	2.5866	[M+H]+	1.35818	2	0.8977	rp	25488-25-9	854352	-	-	C20895	8397.96	7893.22	6963.46	14619.3	12248.2	12447.8	9754.57	9722.25	9639.83	-	1.25783	0.00763924	1.69065	0.757575	up
T3_positive	MW0111694	1,2-Ethanediol	Alcohol and amines	Alcohols	C2H6O2	101.008	62.0368	0.5729	[M+K]+	19.158	3	0.5415	rp	25322-68-3	174	HMDB0037790	-	C15588	40571.8	32379	28171.3	78272.9	57119.1	70646.8	47528	47857.4	47675.8	-	1.22277	0.0138084	2.03753	1.02682	up
T3_positive	MEDP1310	4-Hydroxy-l-tryptophan	Amino acid and Its metabolites	Amino acid derivatives	C11H12N2O3	221.092	220.085	2.5341	[M+H]+	0.689704	3	0.799	rp	25242-90-4	85479	-	-	C21777	940.4	1033.4	1007.1	2153.37	3302.45	2787.75	1976.98	1931.82	1959.03	-	1.26956	0.033294	2.76546	1.46752	up
T3_positive	MW0048956	Clobetasol propionate	Aldehyde,Ketones,Esters	Esters	C25H32ClFO5	467.196	466.192	4.3413	[M+H]+	9.4346	3	0.6828	rp	25122-46-7	32798	-	1867	D01272	226.97	152.21	107.65	3291.44	2675.54	2478.05	1206.88	1206.6	1140.82	-	1.29576	0.00747249	17.347	4.11661	up
T3_positive	MW0168514	2-Hydroxymyristic acid	Organic acid and Its derivatives	Organic acid and Its derivatives	C14H28O3	283.175	244.204	7.6714	[M+K]+	21.4823	3	0.6112	rp	2507-55-3	1563	HMDB0002261	6579	-	48295.8	45755.9	45905.5	30409.4	39103.7	36554.7	32941.4	34033.6	33244.6	-	1.15513	0.0382191	0.757858	-0.4	down
T3_positive	MW0015788	Androsterone sulfate	Hormones and hormone related compounds	Hormones and hormone related compounds	C19H30O5S	371.163	370.181	7.1543	[M+H]+	24.4335	3	0.6218	rp	2479-86-9	159663	HMDB0002759	3559	-	4538.36	6332.87	4147.81	227.77	772.08	607.49	800.92	722.16	836.36	-	1.24534	0.0174998	0.10702	-3.22405	down
T3_positive	MW0159300	Val-trp	Amino acid and Its metabolites	Small Peptide	C16H21N3O3	304.165	303.158	2.8332	[M+H]+	17.2405	3	0.6955	rp	24587-37-9	168182	HMDB0029138	-	-	548.61	418.17	338.29	5559.25	4944.99	4738.21	1810.2	1920.47	1965.44	-	1.30294	0.00172326	11.6794	3.5459	up
T3_positive	MW0126947	Vidarabine	Nucleotide and Its metabolites	Nucleotide and Its metabolites	C10H13N5O4	290.086	267.097	2.0252	[M+Na]+	1.09784	2	0.9321	rp	24356-66-9	21704	HMDB0014340	-	C07195	29197.1	31391.8	31202.1	78392	82669	80737.3	53267.2	52868.2	53160.7	-	1.30965	3.24714e-05	2.63423	1.39738	up
T3_positive	MW0146585	2,3-Benzofluorene	Benzene and substituted derivatives	Benzene and substituted derivatives	C17H12	234.133	216.094	4.2189	[M+NH4]+	14.3796	3	0.7975	rp	243-17-4 | 30777-19-6	9201	-	-	-	3528.83	3460.72	2541.11	1769.82	1781.05	1458.24	2168.21	2169.55	2182.63	-	1.22224	0.0316296	0.525579	-0.928022	down
T3_positive	MW0114361	D-Ribulose 1,5-bisphosphate	Organic acid and Its derivatives	Organic acid and Its derivatives	C5H12O11P2	328.01	309.986	0.5537	[M+NH4]+	17.422	3	0.7162	rp	24218-00-6 | 2002-28-0	123658	-	377	C01182	439.71	460.54	268.78	1696.73	1616.81	2339.28	1119.47	1183.19	1189.41	ko00030,ko00630,ko01100,ko01110,ko01200	1.27018	0.0172966	4.83548	2.27366	up
T3_positive	MW0127135	Sulforaphene	Others	Others	C6H9NOS2	213.98	175.013	1.5019	[M+K]+	9.43911	3	0.5337	rp	2404-46-8	6433206	HMDB0031573	-	-	2414.63	2639.22	2743.93	5151.17	5256.28	5468.51	4257.94	4255.63	4289.62	-	1.30323	3.74176e-05	2.03596	1.02571	up
T3_positive	MEDP1080	Gly-Trp	Amino acid and Its metabolites	Small Peptide	C13H15N3O3	244.118	261.111	2.235	[M+H-H2O]+	22.8209	1b	0.6961	rp	2390-74-1	92181	HMDB0028852	`	-	8515.16	8282.59	5976.6	3520.35	3599.36	3226.6	8457.97	8456.27	8395.09	-	1.25568	0.0340328	0.454297	-1.13829	down
T3_positive	MW0105712	L-Argininosuccinic acid	Amino acid and Its metabolites	Amino acid derivatives	C10H18N4O6	291.137	290.123	1.3296	[M+H]+	2.40291	2	0.9478	rp	2387-71-5	16950	HMDB0000052	5115	C03406	27863	21865.8	34183.2	99899.8	88536.6	123293	41280.5	32255.9	43258.4	ko00220,ko00250,ko01100,ko01110,ko01230	1.27559	0.0108378	3.71495	1.89334	up
T3_positive	MW0140534	4-Hydroxyphenylacetaldoxime	Benzene and substituted derivatives	Phenolics	C8H9NO2	341.093	151.063	2.7449	[2M+K]+	8.6	3	0.6975	rp	23745-82-6	5460411	-	-	C04350	3179.24	3134.2	3871.66	7103.56	6143.81	7296.45	4606.59	4612.66	4638.18	ko00460,ko01100,ko01110,ko01210	1.27553	0.00224799	2.01705	1.01224	up
T3_positive	MEDL01829	Isothankunic acid	Terpenoids	Triterpene	C30H48O6	469.329	504.345	8.1429	[M+H-2H2O]+	8.19691	3	0.6403	rp	22882-19-5	12302703	HMDB0040772	-	-	26138.3	23228.9	24520	12317.8	15729.2	10878.6	14191.1	14593.7	14591.3	-	1.24187	0.00471862	0.526826	-0.924602	down
T3_positive	MW0124096	Famprofazone	Aldehyde,Ketones,Esters	Ketones	C24H31N3O	416.215	377.247	6.5551	[M+K]+	8.4506	3	0.6589	rp	22881-35-2	3326	HMDB0041891	-	-	1.73325e+06	1.67105e+06	1.39466e+06	1.38037e+06	1.02975e+06	1.10281e+06	702585	696831	702693	-	1.06933	0.0452808	0.732017	-0.45005	down
T3_positive	MW0109096	Phe-Asp	Amino acid and Its metabolites	Small Peptide	C13H16N2O5	281.114	280.106	2.6303	[M+H]+	0.95	3	0.8405	rp	22828-05-3	6992643	HMDB0028991	23739	-	610.7	735.45	352.52	3732.76	3943.25	3708.44	1879.45	1859.37	1857.29	-	1.27913	5.68157e-05	6.70198	2.74459	up
T3_positive	MEDP1448	MG(18:0/0:0/0:0)	GL	MG	C21H42O4	381.298	358.308	7.1382	[M+Na]+	0.725	2	0.9858	rp	22610-61-3	15560610	HMDB0011131	-	C01885	427587	424689	577138	161462	360328	249303	304416	302016	303693	ko00561,ko01100	1.04568	0.0464055	0.539447	-0.890447	down
T3_positive	MW0006831	Diflunisal	Benzene and substituted derivatives	Benzene and substituted derivatives	C13H8F2O3	251.047	250.044	7.6454	[M+H]+	12.8981	3	0.7654	rp	22494-42-4	3059	HMDB0014999	-	C01691	10307.4	10937.6	11343.4	8382.17	8895.88	9262.87	8812.82	9007.77	8731.42	-	1.22204	0.00748109	0.814429	-0.296139	down
T3_positive	MW0010041	Vardenafil	Benzene and substituted derivatives	Benzene and substituted derivatives	C23H32N6O4S	489.229	488.221	4.312	[M+H]+	6.47579	3	0.8694	rp	224785-90-4 | 224789-15-5	135400189	HMDB0015000	-	-	385	1902.57	1930.6	14152.1	9715.19	10262.9	5377.72	5418.68	5558.53	-	1.18542	0.0113899	8.09123	3.01636	up
T3_positive	MW0104236	1-Aminocyclobutanecarboxylic acid	Amino acid and Its metabolites	Amino acid derivatives	C5H9NO2	116.07	115.063	1.227	[M+H]+	1.2596	3	0.744	rp	22264-50-2 | 22264-16-0 | 117259-24-2	89643	-	44305	-	554.54	1092.88	4044.82	25192.5	24958.2	22334	12430.4	12435.2	12560.9	-	1.21602	0.000116217	12.734	3.67061	up
T3_positive	MEDP1817	2-Acetylpyrazine	Heterocyclic compounds	Heterocyclic compounds	C6H6N2O	123.055	122.048	0.8316	[M+H]+	1.96647	1b	0.6724	rp	22047-25-2	30914	HMDB0031861	-	-	18764.7	16774.2	14964	20275	26113.6	23844.7	21060.7	20868.6	21062.8	-	1.1214	0.0393049	1.39068	0.475786	up
T3_positive	MW0139689	Selamectin	Others	Medicine	C43H63NO11	770.437	769.44	8.1558	[M+H]+	14.913	3	0.6903	rp	220119-17-5 | 165108-07-6	9578507	-	-	-	51156.2	59284.8	59643	33709.5	26241.6	30726.3	33310.9	32958.6	33305.6	-	1.26109	0.00208433	0.533133	-0.907432	down
T3_positive	MW0115063	Bardoxolone methyl	Organic acid and Its derivatives	Organic acid and Its derivatives	C32H43NO4	506.324	505.319	6.6163	[M+H]+	7.12693	3	0.8663	rp	218600-53-4	400769	-	-	-	26388	20349.7	47288.3	216255	144042	211908	105687	105705	105204	-	1.25663	0.0132165	6.08561	2.6054	up
T3_positive	MW0011413	(5x,6x)-5,6-Epoxyergosta-7,22-dien-3-ol	Alcohol and amines	Alcohols	C28H44O2	395.315	412.334	7.8966	[M+H-H2O]+	22.6993	3	0.6478	rp	216302-95-3	6163727	HMDB0033421	-	-	5007.83	5120.59	5277.18	296.93	1505.58	1681.85	1988.28	1822.81	1082.82	-	1.10412	0.00996946	0.226175	-2.14449	down
T3_positive	MW0109575	L-Deoxyalliin	Amino acid and Its metabolites	Amino acid derivatives	C6H11NO2S	144.056	161.051	0.5729	[M+H-H2O]+	20.3886	3	0.587	rp	21593-77-1	98280	HMDB0034323	-	C16759	4299.25	3983.03	3474.15	7964.05	5491.03	7098.76	5363.35	5395.45	5500.98	-	1.19609	0.044631	1.74831	0.805958	up
T3_positive	MW0114546	Glucosamine 1-phosphate	Organic acid and Its derivatives	Organic acid and Its derivatives	C6H14NO8P	298.015	259.046	2.5932	[M+K]+	17.0426	3	0.5348	rp	2152-75-2	188960	-	3389	C06156	9305.28	8428.72	7921.48	7324.15	6672.34	6899.59	7459.5	7416.12	7456.61	ko00520,ko01100,ko01250	1.15625	0.0413508	0.814488	-0.296035	down
T3_positive	MW0168820	Berberine	Alkaloids	Alkaloids	C20H18NO4+	336.13	336.124	5.0775	[M+H]+	14.5125	3	0.7436	rp	2086-83-1	2353	HMDB0003409	3471	C00757	13671.6	13065.6	12679.7	11361.9	12153.8	11326.2	10539.6	10542.2	10483.9	ko01110	1.17006	0.0183398	0.883931	-0.177994	down
T3_positive	MW0141009	1-(1Z-Octadecenyl)-2-(4Z,7Z,10Z,13Z,16Z,19Z-docosahexaenoyl)-sn-glycero-3-phosphoethanolamine	Others	Others	C45H78NO7P	776.573	775.552	7.5849	[M+H]+	15.9151	3	0.7583	rp	206059-98-5	42607458	HMDB0011394	-	-	18506.1	16351.2	16576.4	10737.3	12031.4	12329.7	13344	13254.1	13247.6	-	1.25674	0.00410293	0.6824	-0.551309	down
T3_positive	MEDP1180	LPC(14:0/0:0)	GP	LPC	C22H46NO7P	468.308	467.301	6.5239	[M+H]+	1.31301	2	0.9621	rp	20559-16-4	460604	HMDB0010379	-	C00157	94692.9	59026.3	143194	449714	470164	530844	252399	250347	252379	ko00564,ko00590,ko00592,ko01100,ko01110	1.25109	0.000367382	4.886	2.28866	up
T3_positive	MW0153226	Lysyl-Isoleucine	Amino acid and Its metabolites	Small Peptide	C12H25N3O3	242.186	259.19	2.0929	[M+H-H2O]+	1.1958	3	0.7642	rp	20556-13-2	7010499	HMDB0028954	-	-	1223.91	1092.34	907.46	4575.14	4487.64	4573.59	2451.48	2406.78	2480.6	-	1.30272	0.000248091	4.23002	2.08067	up
T3_positive	MW0153284	Lys-Val	Amino acid and Its metabolites	Small Peptide	C11H23N3O3	268.165	245.174	2.6391	[M+Na]+	5.4	3	0.6494	rp	20556-11-0	6992341	HMDB0028964	23853	-	464.17	77.12	425.1	5403.16	4839.32	4869.54	1813.16	1617.69	1762.12	-	1.22311	7.80161e-05	15.6376	3.96695	up
T3_positive	MW0193980	Sorbitol-6-phosphate	Carbohydrates and Its metabolites	Phosphate sugars	C6H15O9P	285.038	262.045	0.5556	[M+Na]+	12.5806	3	0.7003	rp	20479-58-7	152306	HMDB0005831	-	C01096	7385.03	4565.37	2861.75	9081.53	12097.8	14208.7	4882.25	4383.49	4584.72	ko00051,ko01100	1.09747	0.0266618	2.38912	1.25648	up
T3_positive	MW0120733	Anabasamine	Heterocyclic compounds	Heterocyclic compounds	C16H19N3	254.161	253.158	1.4124	[M+H]+	11.1601	3	0.8085	rp	20410-87-1 | 400738-05-8	161313	-	44025	-	10251.2	4144.9	4020.73	18551.5	16540.3	17466.3	13482.8	12901.2	13926.5	-	1.15605	0.0241554	2.8538	1.51288	up
T3_positive	MW0014351	14-Demethyllanosterol	Alcohol and amines	Alcohols	C29H48O	481.366	412.37	8.0716	[M+Na+HCOOH]+	1.01794	2	0.9612	rp	2026401	165609	-	-	-	395.74	240.33	773.36	7367.92	9240.14	7748.13	4715.67	4647.25	4737.06	-	1.27732	0.00336739	17.2809	4.1111	up
T3_positive	MW0109211	Phenylalanylphenylalanine	Amino acid and Its metabolites	Small Peptide	C18H20N2O3	313.154	312.147	3.3246	[M+H]+	2.79461	2	0.9349	rp	201023-39-4	65104	HMDB0013302	-	-	104.65	78.6	166.48	4204.02	4846.55	4039.66	2001.97	2001.08	1985.4	-	1.30202	0.00306517	37.4295	5.22611	up
T3_positive	MEDP0362	Neopterin	Heterocyclic compounds	Pteridines and derivatives	C9H11N5O4	236.077	253.081	1.5317	[M+H-H2O]+	1.86934	3	0.7721	rp	2009-64-5	135398721	HMDB0000845	-	C05926	6148.27	6906.08	3199.29	8439.3	11287.2	9507.18	6838.78	6850.15	6826.18	ko00790	1.0209	0.0412475	1.79859	0.846867	up
T3_positive	MW0001165	1-(4-Fluorobenzyl)piperazine dihydrochloride	Others	Others	C11H17Cl2FN2	195.122	266.075	7.9884	[M+H]+	16.6523	3	0.678	rp	199672-06-5	12679862	-	96603	-	70218.7	63943.1	69158.9	36490.5	20577.3	37273.7	46013.3	46217.6	45976.7	-	1.17362	0.0136513	0.464004	-1.10779	down
T3_positive	MW0109339	Pro-Tyr	Amino acid and Its metabolites	Small Peptide	C14H18N2O4	557.259	278.127	2.8332	[2M+H]+	3.44543	3	0.6878	rp	19786-36-8	152264	HMDB0029029	23717	-	17662	12527.2	16518.6	10084.4	6025.45	4255.53	10116.1	10145.4	10310.3	-	1.11627	0.0198296	0.436018	-1.19754	down
T3_positive	MW0147281	Ceanothine B	Amino acid and Its metabolites	Small Peptide	C29H36N4O4	527.261	504.274	4.1317	[M+Na]+	0.584148	3	0.651	rp	19471-43-3	5281585	HMDB0029339	-	C10001	62.34	98.7	46.97	13808.8	7144.7	8843.69	3855.7	3734.06	3797.26	-	1.30383	0.0387119	143.249	7.16238	up
T3_positive	MW0161746	Stigmasta-5,7,22-trien-3-ol, (3beta)-	Alcohol and amines	Alcohols	C29H46O	452.395	410.355	8.4596	[M+CH3CN+H]+	13.1082	3	0.5428	rp	19432-13-4	20843308	-	-	-	102831	117066	113091	81010.2	79094.6	89643.9	74793.1	75653	74518.4	-	1.2254	0.00781261	0.750022	-0.414995	down
T3_positive	MEDP0588	Ritalinic acid	Organic acid and Its derivatives	Organic acid and Its derivatives	C13H17NO2	242.11	219.126	4.3114	[M+Na]+	12.137	1b	0.709	rp	19395-41-6	86863	HMDB0042008	-	-	297.77	395.04	301.96	4554.39	3389.19	3553.55	1810.4	1814.49	1777.57	-	1.30528	0.0102098	11.5576	3.53077	up
T3_positive	MW0119658	3-Isomangostin	Heterocyclic compounds	Heterocyclic compounds	C24H26O6	411.181	410.173	7.7679	[M+H]+	7.59506	3	0.7568	rp	19275-46-8	13873655	HMDB0041521	-	-	6362.17	6916.17	4541.51	2990.51	1359.68	3447.32	2678.86	2631.68	2658.88	-	1.06219	0.0257291	0.437574	-1.1924	down
T3_positive	MW0015288	8,9-DiHETrE	FA	Oxidized lipids	C20H34O4	356.287	338.246	7.206	[M+NH4]+	15.8109	3	0.6628	rp	192461-96-4	5283144	HMDB0002311	-	C14773	22605.6	29673.2	23414.1	5842.74	9651.37	8243.53	7520.17	7508.51	7662.86	ko00590,ko01100	1.26164	0.00658629	0.313605	-1.67298	down
T3_positive	MW0168997	Cysteinylglycine	Amino acid and Its metabolites	Small Peptide	C5H10N2O3S	179.048	178.041	0.8662	[M+H]+	1.50872	3	0.7975	rp	19246-18-5	439498	HMDB0000078	5134	C01419	105477	101735	89295.3	142686	157441	137069	114085	112460	112680	ko00480,ko01100	1.24213	0.00443856	1.47449	0.560214	up
T3_positive	MW0139705	Shoyuflavone B	Flavonoids	Flavonoid	C19H14O10	403.068	402.059	2.6921	[M+H]+	0.312852	3	0.6417	rp	190712-88-0	10001145	HMDB0034589	-	-	1118.01	1301.77	1034.22	2594.97	3073.94	2760.99	1939.99	1947.36	1938.5	-	1.28858	0.00157463	2.44062	1.28725	up
T3_positive	MW0005348	5-(10,13-Nonadecadienyl)-1,3-benzenediol	Benzene and substituted derivatives	Phenolics	C25H40O2	373.304	372.303	6.8963	[M+H]+	15.5939	3	0.8683	rp	189562-02-5	131752737	HMDB0039867	-	-	97206.2	105163	68561.4	26352.3	19945.5	35884.3	47697.9	48727.3	47601.9	-	1.23395	0.018058	0.303333	-1.72103	down
T3_positive	MW0140161	4-Hydroxy-4-(3-hydroxy-1-butenyl)-3,5,5-trimethyl-2-cyclohexen-1-one	Alcohol and amines	Alcohols	C13H20O3	207.133	224.141	5.0775	[M+H-H2O]+	12.0851	3	0.6348	rp	189351-15-3 | 24427-77-8	5280654	-	-	C04166	4180.43	4070.86	3704.52	3343.86	3085.96	2943.25	3091.56	3130.4	3158.32	-	1.205	0.0107185	0.783976	-0.351118	down
T3_positive	MW0134121	5,7-Dihydroxy-2-phenyl-6-[3,4,5-trihydroxy-6-(hydroxymethyl)oxan-2-yl]-8-(3,4,5-trihydroxyoxan-2-yl)chromen-4-one	Aldehyde,Ketones,Esters	Ketones	C26H28O13	571.139	548.153	3.0784	[M+Na]+	2.83102	3	0.8086	rp	185145-34-0	44715843	HMDB0140256	-	-	240.64	241.14	158	3774.96	3275.05	2884.79	1472.97	1520.36	1496.81	-	1.30331	0.00636111	15.5285	3.95684	up
T3_positive	MW0140330	(2S,4S)-4-hydroxy-2,3,4,5-tetrahydrodipicolinic acid	Organic acid and Its derivatives	Organic acid and Its derivatives	C7H9NO5	226.011	187.048	0.5709	[M+K]+	0.106877	3	0.6241	rp	185103-33-7	53323638	-	-	C20258	2930.9	1938.74	1378.8	8119.63	5280.14	7035.16	4164.35	4167.57	4099.41	ko00261,ko00300,ko01100,ko01110,ko01230	1.21402	0.0140932	3.27041	1.70947	up
T3_positive	MW0147862	Cucurbitacin E	Aldehyde,Ketones,Esters	Esters	C32H44O8	579.291	556.304	7.247	[M+Na]+	1.30733	3	0.7134	rp	18444-66-1	5281319	-	-	C08797	16665	12618.4	13981	2536.27	8076.27	4127.96	9248.48	9418.06	9189.42	ko01110	1.13768	0.0118273	0.340707	-1.5534	down
T3_positive	MW0055064	(2S)-3-[(Z)-octadec-1-enoxy]propane-1,2-diol	GL	MG	C21H42O3	343.311	342.313	7.137	[M+H]+	18.3761	3	0.6213	rp	18330-10-4	11824075	HMDB0011153	-	C01885	15815.6	14368.2	19484.6	7017.65	11261.6	8457.32	10133.9	10157.2	10182.6	ko00561,ko01100	1.16709	0.0190995	0.538301	-0.893515	down
T3_positive	MW0138043	Emblicanin B	Heterocyclic compounds	Heterocyclic compounds	C34H20O22	781.058	780.045	3.2033	[M+H]+	11.9782	3	0.7493	rp	180465-45-6	119058017	HMDB0030436	-	-	11214.3	7965.02	8801.3	2847.06	1984.2	1856.19	7015.27	6924.98	7007.84	-	1.27718	0.0121025	0.239003	-2.0649	down
T3_positive	MW0055440	Octadecyl fumarate	FA	Others	C22H40O4	369.298	368.293	8.4682	[M+H]+	5.50359	3	0.5885	rp	1741-93-1	6436905	HMDB0038073	-	-	52274.8	43532.6	51186.4	36959.4	38935.8	35412.3	35503.9	35197.8	35476.2	-	1.19149	0.0367862	0.757226	-0.401203	down
T3_positive	MW0054524	LPC(16:0/0:0)	GP	LPC	C24H50NO7P	496.34	495.332	6.9762	[M+H]+	3.53676	2	0.9561	rp	17364-16-8	460602	HMDB0010382	-	C00157	139230	106625	231326	829941	1.2019e+06	901676	570810	573907	570746	ko00564,ko00590,ko00592,ko01100,ko01110	1.26465	0.0122577	6.14759	2.62002	up
T3_positive	MW0013318	25-Acetylvulgaroside	Heterocyclic compounds	Heterocyclic compounds	C27H42O7	479.296	478.293	6.7604	[M+H]+	8.02022	3	0.6979	rp	172616-88-5	85163499	HMDB0041365	-	-	772853	633810	912417	2.28751e+06	2.34742e+06	2.19372e+06	1.6373e+06	1.63766e+06	1.62542e+06	-	1.28725	0.000391691	2.94455	1.55805	up
T3_positive	MW0007574	Mefenorex	Benzene and substituted derivatives	Benzene and substituted derivatives	C12H18ClN	229.141	211.113	4.5513	[M+NH4]+	14.4625	3	0.7011	rp	17243-57-1 | 111051-41-3 | 111051-42-4	21777	-	-	-	2833.21	3226.63	2282	1816.93	1676.14	858.04	1410.99	1366.78	1320.5	-	1.05344	0.0308237	0.521601	-0.938982	down
T3_positive	MEDN1024	Piperidine acid	Organic acid and Its derivatives	Organic acid and Its derivatives	C6H11NO2	130.086	129.079	0.6217	[M+H]+	2.04328	2	0.9349	rp	1723-00-8	439227	HMDB0005960	-	-	92129.7	95327	82303.7	50564.9	34149.3	19096.8	59077.4	58350.4	56701.9	-	1.14665	0.0146242	0.384827	-1.37772	down
T3_positive	MW0016119	beta-Glycerophosphoric acid	GP	GP	C3H9O6P	173.02	172.014	0.8662	[M+H]+	2.91122	2	0.9284	rp	17181-54-3	2526	HMDB0002520	6708	C02979	15929.1	18985.1	13646.2	11081.4	7110.45	7264.42	11413.7	11396.1	11339.5	-	1.15898	0.0199367	0.524219	-0.93176	down
T3_positive	MW0126580	5-{9,32-Dihydroxy-6,10,13,20,32-pentamethyl-27-methylidene-33,34,35-trioxa-22-azahexacyclo[27.3.1.1^{1,4}.1^{4,7}.0^{12,17}.0^{17,23}]pentatriaconta-10,13,22-trien-14-yl}-3-methyloxolan-2-one	Aldehyde,Ketones,Esters	Esters	C42H63NO7	693.476	693.461	7.6193	[M+]+	21.8486	3	0.5554	rp	170713-72-1	10532690	HMDB0030492	-	-	21906.2	18639.6	19770.7	13111.5	13630.3	13894.3	14260.2	14032.8	14048.8	-	1.27154	0.0163817	0.673714	-0.569792	down
T3_positive	MW0111147	N-(5Z,8Z,11Z-eicosatrienoyl)-ethanolamine	Alcohol and amines	Amines	C22H39NO2	350.303	349.298	8.6072	[M+H]+	1.0258	3	0.8686	rp	169232-04-6	16061185	-	-	-	3554.75	3553.01	5633.82	10009.1	11551.1	7774.69	5777.31	5776.44	5751.29	-	1.19259	0.0185647	2.3023	1.20308	up
T3_positive	MW0144835	Alangicine	Benzene and substituted derivatives	Benzene and substituted derivatives	C28H36N2O5	481.264	480.262	4.8846	[M+H]+	12.4859	3	0.856	rp	16531-04-7	442158	-	-	C09327	3846.35	8747.54	7725.69	24887.6	16752.8	15198.9	11848.8	11902.1	11903.2	-	1.14697	0.0374342	2.79726	1.48402	up
T3_positive	MW0063644	Squamosinin A	FA	Others	C36H62O8	605.429	622.444	6.7604	[M+H-H2O]+	21.0229	3	0.6539	rp	163597-71-5	102153520	HMDB0041429	-	-	11891.9	11651.7	19653.8	34063.9	28678.8	24896	39570.1	39420.3	39466.6	-	1.15961	0.0166613	2.0288	1.02062	up
T3_positive	MW0144849	L-Alanyl-L-tryptophan	Amino acid and Its metabolites	Small Peptide	C14H17N3O3	276.134	275.127	2.6041	[M+H]+	3.01362	3	0.8612	rp	16305-75-2	85362	HMDB0013209	-	-	101.06	137.34	260.34	4222.76	3405.62	3186.58	1309.74	1368.23	1417.36	-	1.29042	0.00723036	21.6846	4.4386	up
T3_positive	MW0107599	N-Isovaleroylglycine	Amino acid and Its metabolites	Amino acid derivatives	C7H13NO3	142.086	159.089	1.7629	[M+H-H2O]+	0.886599	3	0.7285	rp	16284-60-9	546304	HMDB0000678	5647	-	1221.03	1546.76	597.93	3453.79	2734.93	3018.33	1752.13	1757.86	1805.3	-	1.15268	0.00624346	2.73554	1.45182	up
T3_positive	MW0144895	Allopurinol riboside	Nucleotide and Its metabolites	Nucleotide and Its metabolites	C10H12N4O5	307.044	268.081	1.6931	[M+K]+	0.675	3	0.883	rp	16220-07-8	135407110	HMDB0000481	-	-	140.93	43.89	85.49	3680.45	2197.09	2068.28	1425.48	1371.64	1437.1	-	1.28132	0.0381785	29.3952	4.87751	up
T3_positive	MW0053997	Hydroxyvalerenic Acid	Organic acid and Its derivatives	Organic acid and Its derivatives	C15H22O3	268.188	250.157	5.9641	[M+NH4]+	7.8975	3	0.759	rp	1619-16-5	6537505	HMDB0036563	-	-	10988.3	9865.6	8309.06	6068.14	7261.46	7457.93	10984.4	11014.2	10545.4	-	1.11739	0.0486975	0.712806	-0.488419	down
T3_positive	MW0109212	Phenylalanylserine	Amino acid and Its metabolites	Small Peptide	C12H16N2O4	522.256	252.111	3.0806	[2M+NH4]+	0.421249	3	0.7399	rp	16053-39-7	193508	HMDB0029004	-	-	525.82	279.58	561.37	12037.1	9214.88	9814.89	3926.87	3911.95	3889.44	-	1.29807	0.00696025	22.7301	4.50653	up
T3_positive	MW0157225	Stizolobic acid	Organic acid and Its derivatives	Organic acid and Its derivatives	C9H9NO6	274.053	227.043	8.9409	[M+HCOO+2H]+	6.85	3	0.7542	rp	15911-87-2	161158	-	-	C06047	15258.6	12086.9	11142.7	8101.2	9993.54	6978.78	9647.69	10395	9178.24	ko00350	1.10242	0.0485957	0.651461	-0.61825	down
T3_positive	MW0049159	D-Citramalic acid	Organic acid and Its derivatives	Organic acid and Its derivatives	C5H8O5	187.004	148.037	1.5716	[M+K]+	11.5717	3	0.7476	rp	1583974	439766	-	-	C02612	5475.04	5086.98	4954.34	4222.61	3517.32	3820.46	3044.52	3069.79	2993.94	ko00290,ko00660,ko01100,ko01210,ko01230	1.21111	0.00817477	0.745045	-0.4246	down
T3_positive	MW0007155	Flavidulol D	Benzene and substituted derivatives	Phenolics	C35H56O3	542.453	524.423	8.3859	[M+NH4]+	1.21876	3	0.6101	rp	156980-40-4	131752918	HMDB0040736	-	-	4174.56	4670.26	4569.11	3431.87	3113.03	3223.34	3708.13	3790.25	3796.9	-	1.26143	0.00453366	0.728216	-0.457561	down
T3_positive	MW0103287	Arsenite	Others	Others	AsH3O3	143.955	125.93	8.9199	[M+NH4]+	23.1362	3	0.6039	rp	15502-74-6	545	HMDB0011620	-	-	33023.6	31890.7	34252.5	30930.5	28769.4	29011.4	29889.7	29787.3	29452.3	-	1.14601	0.0225719	0.894567	-0.160738	down
T3_positive	MEDP0075	N-Acetyl-L-arginine	Amino acid and Its metabolites	Amino acid derivatives	C8H16N4O3	217.129	216.122	0.8316	[M+H]+	2.71386	2	0.8943	rp	155-84-0	67427	HMDB0004620	-	-	1483.64	4509.81	3506.67	13604.5	20667.8	16314.6	13622.9	13392.2	13358.5	-	1.21415	0.011596	5.32488	2.41275	up
T3_positive	MW0139620	Rutin	Flavonoids	Flavonoid	C27H30O16	649.105	610.153	1.9028	[M+K]+	17.4719	3	0.6729	rp	153-18-4	5280805	HMDB0003249	3677	C05625	13955	12287.6	10817.4	8759.27	5850.42	8140.12	10365.8	10251.5	10449.4	ko01100,ko01110	1.13062	0.0196889	0.613864	-0.704009	down
T3_positive	MW0049035	Cortexolone	Hormones and hormone related compounds	Hormones and hormone related compounds	C21H30O4	385.179	346.214	7.8916	[M+K]+	3.46094	3	0.5189	rp	152-58-9	440707	HMDB0000015	5088	C05488	15108.3	23266.9	13422.4	2923.95	6183.85	4961.96	8033.66	7696.02	7998.95	ko01100	1.21177	0.0434942	0.271629	-1.88029	down
T3_positive	MW0117872	2,4,12-Octadecatrienoic acid piperidide	Organic acid and Its derivatives	Organic acid and Its derivatives	C23H39NO	346.314	345.303	6.9476	[M+H]+	12.5375	3	0.8145	rp	151391-71-8	131751247	HMDB0032034	-	-	21462.1	21319	17123.7	11170.9	13224.3	12868.5	15409	15422.3	14891.1	-	1.22618	0.0202289	0.622049	-0.684899	down
T3_positive	MW0052580	Epomusenin A	FA	Others	C37H66O3	559.517	558.501	7.137	[M+H]+	15.682	3	0.673	rp	151310-53-1	10507050	HMDB0029977	-	-	10212.6	9671.5	10495.5	2625.23	4007.6	3396.41	13067.3	13206	12200.9	-	1.28235	0.000427405	0.330131	-1.59889	down
T3_positive	MW0009665	Retigabine	Benzene and substituted derivatives	Benzene and substituted derivatives	C16H18FN3O2	304.15	303.138	1.6891	[M+H]+	11.3671	3	0.7209	rp	150812-12-7	121892	-	-	-	125.43	189.53	976.35	24007.8	18894.3	18068.6	9093.14	9086.65	9107.16	-	1.25795	0.00757996	47.2162	5.56121	up
T3_positive	MW0193990	O-Succinyl-L-Homoserine	Amino acid and Its metabolites	Amino acid derivatives	C8H13NO6	184.063	219.074	1.3927	[M+H-2H2O]+	5.525	3	0.7812	rp	1492-23-5	439406	HMDB0255868	-	C01118	3637.53	3826.13	4049.34	7713.85	9094.07	6392.15	4445.16	4420.29	4459.16	ko00270,ko00920,ko01100,ko01110,ko01230	1.25173	0.035248	2.01512	1.01087	up
T3_positive	MW0054416	L-rhamnulose	Carbohydrates and Its metabolites	Sugars	C6H12O5	129.054	164.069	0.7977	[M+H-2H2O]+	1.175	2	0.9145	rp	14807-05-7	14461866	HMDB0010207	-	C00861	35711.3	31901.1	28377.5	21852.6	18433.1	18562.6	21468.3	21394.3	21127.7	ko00051,ko01100	1.23529	0.0136388	0.613068	-0.705882	down
T3_positive	MEDP1060	Hydroxyquinoline	Heterocyclic compounds	Heterocyclic compounds	C9H7NO	146.059	145.053	2.5341	[M+H]+	1.09181	2	0.8923	rp	148-24-3	1923	-	44006	C19434	3251.74	4001.22	3313.78	15429.3	15157.1	15259.8	7850.01	7847.95	7916.32	-	1.30682	0.000120156	4.33873	2.11727	up
T3_positive	MW0169367	L-Proline	Amino acid and Its metabolites	Amino acids	C5H9NO2	116.07	115.063	0.8146	[M+H]+	2.41257	2	0.9879	rp	147-85-3	145742	HMDB0000162	29	C00148	100010	95342.5	89172.4	180677	150710	148613	123815	125059	123769	ko00330,ko00332,ko00470,ko00970,ko01100,ko01110,ko01230,ko02010	1.26676	0.0175241	1.68702	0.75448	up
T3_positive	MW0007822	Mitoglitazone	Benzene and substituted derivatives	Phenolics	C19H18N2O4S	353.093	370.099	1.1928	[M+H-H2O]+	3.77107	3	0.6111	rp	146062-49-9	10429242	-	63083	-	7388.9	3561.2	11235.5	28296.9	43462.3	38742	19985.8	19987.6	20091.2	-	1.20688	0.010507	4.98077	2.31637	up
T3_positive	MW0103589	Guanosine-5'-diphosphate	Nucleotide and Its metabolites	Nucleotide and Its metabolites	C10H15N5O11P2	444.031	443.024	0.9173	[M+H]+	2.04641	2	0.9407	rp	146-91-8 | 157420-46-7 | 105184-12-1 | 105184-46-1	135398619	HMDB0001201	-	C00035	24311.1	19754.5	19063.8	807.2	2081.78	3932.3	13590.8	13252.2	13430.1	ko00230,ko01100,ko01232,ko04144	1.22452	0.00182465	0.108052	-3.2102	down
T3_positive	MW0170020	Xanthosine	Nucleotide and Its metabolites	Nucleotide and Its metabolites	C10H12N4O6	285.084	284.076	1.5194	[M+H]+	1.8	3	0.714	rp	146-80-5	64959	HMDB0000299	3408	C01762	3901.26	4454.73	3496.88	5008.43	6554.79	5767.41	4342.18	4458.3	4449.2	ko00230,ko01100,ko01110,ko01232,ko02010	1.14528	0.0339195	1.46215	0.548088	up
T3_positive	MW0013431	2-Decaprenyl-3-methyl-6-methoxy-1,4-benzoquinone	Benzene and substituted derivatives	Benzene and substituted derivatives	C58H88O4	849.679	848.668	6.6569	[M+H]+	8.26904	3	0.847	rp	14599-49-6	135625501	HMDB0006484	-	-	12528	17968.5	17289.4	7665.31	9835.56	9527.2	8725.53	8284.02	8512.17	-	1.17895	0.041636	0.565608	-0.822125	down
T3_positive	MW0106932	Glu-Val	Amino acid and Its metabolites	Small Peptide	C10H18N2O5	269.107	246.122	2.0215	[M+Na]+	9.175	3	0.6542	rp	1453453	6992567	HMDB0028832	23993	-	49781.8	53693	53844.3	183359	182643	172752	101322	100731	101276	-	1.3102	0.000158892	3.42459	1.77593	up
T3_positive	MW0106177	(S)-2-(2-Chlorophenyl)-2-(6,7-dihydrothieno[3,2-c]pyridin-5(4H)-yl)acetic acid	Benzene and substituted derivatives	Benzene and substituted derivatives	C15H14ClNO2S	330.028	307.043	4.429	[M+Na]+	9.32544	3	0.7656	rp	144457-28-3	9861403	-	85088	-	14009.3	13273.7	12859.3	11292.1	11709.9	12235.6	12446.5	12521.4	12624.8	-	1.16248	0.0210414	0.877817	-0.188008	down
T3_positive	MW0062257	PGF2alpha methyl ether	Hormones and hormone related compounds	Hormones and hormone related compounds	C21H38O4	355.284	354.277	7.1953	[M+H]+	4.38037	3	0.6906	rp	143656-18-2	5283074	-	-	-	96251.4	119318	96342.4	34020.3	48841.6	42707	47214.8	47174.3	47166.6	-	1.26593	0.00500119	0.402578	-1.31266	down
T3_positive	MW0017158	cis-5,6-Dihydro-5,6-dihydroxy-carotene	Others	Hydrocarbon derivatives	C40H58O2	571.462	570.444	7.9829	[M+H]+	20.132	3	0.7835	rp	143167-26-4	53477757	HMDB0002746	-	-	84560.6	79398.5	79028	52038.3	46074.4	50221.7	60847.9	60606.6	60519.8	-	1.29194	0.000230942	0.610462	-0.712026	down
T3_positive	MEDP1584	2-Amino-2-deoxymannose	Nucleotide and Its metabolites	Nucleotide and Its metabolites	C6H13NO5	162.076	179.079	0.8456	[M+H-H2O]+	0.86896	2	0.8786	rp	14307-02-9 | 2636-92-2	123961	-	-	-	125888	113284	110968	347829	472326	280595	205770	205230	205751	-	1.26196	0.0460158	3.14374	1.65248	up
T3_positive	MW0126097	Phenol red	Heterocyclic compounds	Heterocyclic compounds	C19H14O5S	355.07	354.056	8.4856	[M+H]+	15.4097	3	0.7227	rp	143-74-8	4766	-	-	-	33231.5	44342.6	41661.2	21887	24532.6	20408.3	23987.5	30943.4	29388.7	-	1.237	0.0242346	0.560471	-0.835289	down
T3_positive	MW0115330	Sweroside	Aldehyde,Ketones,Esters	Esters	C16H22O9	381.117	358.126	3.6932	[M+Na]+	2.4902	3	0.8834	rp	14215-86-2	161036	-	-	C17071	6346.55	4414.16	5281.5	7561.05	9079.53	8000	6464.48	6471.76	6471.48	-	1.15256	0.0176983	1.53598	0.619163	up
T3_positive	FDATN01438	Monosodium glutamate	Others	Medicine	C5H8NNaO4	148.06	169.035	0.7977	[M+H]+	1.05581	2	0.9605	rp	142-47-2 | 16177-21-2 | 6106-04-3	23672308	-	-	-	874277	967389	801603	491764	424923	475431	594388	597175	598664	-	1.28048	0.00601604	0.526665	-0.925041	down
T3_positive	MW0114363	Dronedarone	Aldehyde,Ketones,Esters	Ketones	C31H44N2O5S	557.293	556.297	7.464	[M+H]+	19.8747	3	0.6925	rp	141626-36-0	208898	HMDB0251621	-	D02537	130958	139123	114273	82987.8	53118	52128.4	16638.7	16831.5	16606.6	-	1.19757	0.00822548	0.489743	-1.0299	down
T3_positive	MW0118913	2-Thiouracil	Heterocyclic compounds	Heterocyclic compounds	C4H4N2OS	111.003	128.004	0.5729	[M+H-H2O]+	4.80653	3	0.6315	rp	141-90-2 | 80275-68-9 | 125220-28-2 | 156-82-1 | 124700-71-6 | 126160-72-3 | 124700-72-7	1269845	-	-	C19304	5121.07	4764.56	4175.35	12248.9	7804.76	10419.2	7385.83	7645.86	7602.96	-	1.2293	0.0459456	2.16719	1.11582	up
T3_positive	MW0114564	Glycolaldehyde	Aldehyde,Ketones,Esters	Aldehydes	C2H4O2	102.054	60.0211	1.2244	[M+CH3CN+H]+	1.825	3	0.838	rp	141-46-8	756	HMDB0003344	3205	C00266	3470.12	5728.09	4844.22	7776.06	8154.18	7858.78	7039.48	7049.76	7029.27	ko00040,ko00630,ko00750,ko00790,ko01100	1.15393	0.0351875	1.69408	0.760503	up
T3_positive	MEDN0304	Cinnamic Acid	Organic acid and Its derivatives	Organic acid and Its derivatives	C9H8O2	131.048	148.052	2.1047	[M+H-H2O]+	1.575	2	0.9048	rp	140-10-3	444539	HMDB0000930	5880	C10438	1099.21	1742.86	1121.6	4896.81	4113.51	4292.21	2912.64	2860.65	2876.51	-	1.27087	0.000646051	3.35611	1.74679	up
T3_positive	MW0123158	Brinzolamide	Alcohol and amines	Amines	C12H21N3O5S3	384.068	383.064	1.9639	[M+H]+	1.11242	3	0.6807	rp	138890-62-7	68844	HMDB0015325	-	C07760	506.95	164.19	221.01	2504.43	1973.83	2224.06	890.47	887.45	844.03	-	1.2491	0.000868353	7.51255	2.9093	up
T3_positive	MW0157161	Spheroidenone	FA	Others	C41H58O2	600.468	582.444	7.6541	[M+NH4]+	17.6469	3	0.701	rp	13836-70-9	5366412	-	-	C15903	118143	112494	110056	95280.3	91771.9	84753.6	89126.9	88362.4	89142.4	ko01100,ko01110	1.23629	0.00508594	0.797804	-0.325894	down
T3_positive	MW0009707	Salicin	Benzene and substituted derivatives	Benzene and substituted derivatives	C13H18O7	309.095	286.105	1.3296	[M+Na]+	2.28418	3	0.7195	rp	138-52-3	439503	HMDB0003546	6948	C01451	370580	368480	327385	510227	562012	566964	448951	456864	452248	ko00010	1.27364	0.00147757	1.53707	0.620185	up
T3_positive	MW0140184	(1-((1-Methylpiperidin-2-yl)methyl)-1H-indol-3-yl)(naphthalen-1-yl)methanone	Aldehyde,Ketones,Esters	Ketones	C26H26N2O	383.214	382.204	8.7106	[M+H]+	2.67949	3	0.8039	rp	137642-54-7	9929889	-	85062	-	36080.3	48799.1	40091.7	10125.4	5755.69	8451.09	10338.2	10276	10367.6	-	1.27736	0.00711608	0.194702	-2.36066	down
T3_positive	MW0120777	4-Methyl-5-thiazoleethanol	Alcohol and amines	Alcohols	C6H9NOS	144.047	143.041	2.6722	[M+H]+	1.59315	2	0.8012	rp	137-00-8	1136	HMDB0032985	-	C04294	1851.09	2209.44	1570.68	4364.02	3484.34	3396.87	2283.33	2270.72	2296.08	ko00730,ko01100,ko01240	1.23374	0.0111232	1.99695	0.997796	up
T3_positive	MW0000778	(E)-3-(3,5-dichlorophenyl)-2-pyridin-3-ylprop-2-enenitrile	Benzene and substituted derivatives	Benzene and substituted derivatives	C14H8Cl2N2	275.007	274.007	1.5142	[M+H]+	15.1225	3	0.6941	rp	136831-49-7 | 138989-56-7	5353928	-	45245	-	12262	13070.9	11108.3	37329	39288.5	41916.4	25300.1	25309.3	25538.6	-	1.30576	0.000586188	3.25274	1.70166	up
T3_positive	MW0110218	L-Tyrosyl-L-serine	Amino acid and Its metabolites	Small Peptide	C12H16N2O5	269.113	268.106	1.4125	[M+H]+	0.233702	2	0.9112	rp	13588-99-3	54564570	HMDB0029114	23814	-	3260.61	4818.89	2285.21	10982.8	7581.27	8210.79	5566.12	5559.67	5503.36	-	1.17732	0.0161506	2.58327	1.3692	up
T3_positive	MW0156400	Rifamycin S	Heterocyclic compounds	Heterocyclic compounds	C37H45NO12	678.276	695.294	3.0958	[M+H-H2O]+	17.7057	3	0.5599	rp	13553-79-2	6436726	-	-	-	125.63	471.31	483.09	6742.28	4188.39	5700.88	2886.46	2896.21	2794.01	-	1.24915	0.0178578	15.3992	3.94478	up
T3_positive	MW0103599	Inosine triphosphate	Nucleotide and Its metabolites	Nucleotide and Its metabolites	C10H15N4O14P3	508.989	507.98	0.643	[M+H]+	4.32182	3	0.7221	rp	132-06-9	135398643	HMDB0000189	-	C00081	312251	258983	228314	588258	413745	441344	260948	259182	259670	ko00230,ko01100,ko01232	1.18454	0.041161	1.8052	0.852161	up
T3_positive	MW0115454	Valeraldehyde dibutyl acetal	Aldehyde,Ketones,Esters	Aldehydes	C13H28O2	239.204	216.209	7.0681	[M+Na]+	5.24913	3	0.6954	rp	13112-65-7	22011445	HMDB0032550	-	-	2473.25	2564	3326.54	1171.84	1414.42	1230.68	1710.14	1685.97	1655.86	-	1.2648	0.0240115	0.456365	-1.13174	down
T3_positive	MW0103994	L-2-Hydroxyglutaric acid	Organic acid and Its derivatives	Organic acid and Its derivatives	C5H8O5	186.995	148.037	3.0979	[M+K]+	14.0879	3	0.5964	rp	13095-48-2	439939	HMDB0000694	-	C03196	26424.6	21944.8	22930.9	17647.6	16404.5	18444.7	20314.5	23927.5	24084.3	ko00310,ko01100	1.20276	0.0290149	0.736278	-0.441677	down
T3_positive	MW0141413	15(R)-17-Phenyl trinor prostaglandin F2alpha isopropyl ester	Hormones and hormone related compounds	Hormones and hormone related compounds	C26H38O5	413.267	430.272	8.6094	[M+H-H2O]+	7.72055	3	0.6922	rp	130273-87-9	10477809	-	45718	-	29637.6	28340.7	32942.2	24038.8	24501.9	22677.9	22582.1	22868.5	22546.3	-	1.21313	0.0278269	0.783305	-0.352354	down
T3_positive	MW0003625	3,4-Dihydroxymandelaldehyde	Benzene and substituted derivatives	Benzene and substituted derivatives	C8H8O4	210.076	168.042	1.6061	[M+CH3CN+H]+	0.65	3	0.6959	rp	13023-73-9	151725	HMDB0006242	-	C05577	93407.8	98660.3	78290.2	14557.8	11687.1	12267.1	43569.8	43780.3	43783.1	ko00350,ko01100	1.30521	0.00540883	0.142448	-2.81149	down
T3_positive	MW0126787	Thifluzamide	Alcohol and amines	Amines	C13H6Br2F6N2O2S	564.796	527.84	8.9026	[M+K]+	11.7809	3	0.5851	rp	130000-40-7	86389	-	-	C18505	42691.8	43398.4	40529	28678.5	30288.5	30090.6	31926.8	32018.2	31891.3	-	1.29773	0.000756831	0.703349	-0.507686	down
T3_positive	MW0113863	2'-Adenylic acid	Nucleotide and Its metabolites	Nucleotide and Its metabolites	C10H14N5O7P	348.07	347.063	2.7449	[M+H]+	1.88104	3	0.8051	rp	130-49-4 | 81012-86-4	94136	HMDB0011617	-	C00946	24614.5	19317.4	22102.3	30000.3	34902.1	32080.8	23781.7	23724.6	23965.2	-	1.20485	0.00791739	1.46868	0.554522	up
T3_positive	MW0108678	Nagaba	Amino acid and Its metabolites	Amino acid derivatives	C24H39NO3	390.313	389.293	7.862	[M+H]+	0.26615	2	0.9284	rp	128201-89-8	16759310	HMDB0062330	-	-	722604	638878	547882	336059	432492	293468	51310.6	52221.6	45713.6	-	1.19134	0.013375	0.556217	-0.846281	down
T3_positive	MW0009779	Sulfabenzamide	Benzene and substituted derivatives	Benzene and substituted derivatives	C13H12N2O3S	277.057	276.057	0.569	[M+H]+	22.8942	3	0.6309	rp	127-71-9	5319	-	43335	C72147	9192.84	8666.16	5974.85	13371.4	12506.7	15881.8	11886.6	11883.4	11777	-	1.15961	0.0136286	1.75213	0.809107	up
T3_positive	MW0052887	2-O-(3-Hydroxy-3-methylglutaryl)fasciculol A	Organic acid and Its derivatives	Organic acid and Its derivatives	C36H60O8	620.437	620.429	7.1549	[M+]+	14.3655	3	0.692	rp	126906-00-1	196810	HMDB0036439	-	-	61750.4	56272.9	49926.6	40251.6	35742.1	30553.5	37723.6	37655.4	37442.6	-	1.20076	0.0107033	0.634399	-0.656539	down
T3_positive	MW0015477	9-OxoOTrE	FA	Oxidized lipids	C18H28O3	275.193	292.204	7.7939	[M+H-H2O]+	20.0339	3	0.8298	rp	125559-74-2	11380794	-	45173	-	46297.5	49759.1	50229.7	34579.8	34121.4	32149.6	34433.1	34199.5	34781.3	-	1.29081	0.00124619	0.689407	-0.536573	down
T3_positive	MW0143934	7alpha,12alpha-Dihydroxycholest-4-en-3-one	Aldehyde,Ketones,Esters	Ketones	C27H44O3	381.311	416.329	7.8099	[M+H-2H2O]+	9.17886	2	0.8068	rp	1254-03-1	3081958	-	-	C17339	31699.6	30135.4	36312.8	21998.5	21861.2	11295.4	22314.7	22148.3	22049.7	ko01100	1.05805	0.0368691	0.56196	-0.83146	down
T3_positive	MEDN0682	Octadecanamide	Alcohol and amines	Amines	C18H37NO	284.295	283.288	6.8292	[M+H]+	0.454548	2	0.9592	rp	124-26-5	31292	HMDB0034146	-	C13846	147010	164250	177447	31879	65663.8	45968.8	65875.6	65153.8	65901.4	-	1.24479	0.000996185	0.293656	-1.7678	down
T3_positive	MEDL02028	Spermidine	Alkaloids	Phenolamine	C7H19N3	146.165	145.158	1.2612	[M+H]+	0.312249	3	0.7782	rp	124-20-9	1102	HMDB0001257	254	C00315	37.38	107.79	66.47	4029.67	2667.85	2202.33	1064.67	1087.49	1077.54	ko00330,ko00410,ko00480,ko01100,ko02010	1.29009	0.0338635	42.0518	5.3941	up
T3_positive	MEDP0792	Pyrrolidine	Heterocyclic compounds	Heterocyclic compounds	C4H9N	72.0803	71.0735	0.8713	[M+H]+	1.31471	1b	0.8126	rp	123-75-1	31268	HMDB0031641	-	-	17840.7	19313.5	18978.7	32381.7	40627.5	42078.8	27352.4	26497.1	27776	-	1.27469	0.0209132	2.05028	1.03582	up
T3_positive	MW0130917	Tyrphostin A46	Alcohol and amines	Amines	C10H8N2O3	227.046	204.054	1.9155	[M+Na]+	7.27626	3	0.7323	rp	122520-85-8 | 118409-59-9	5328768	-	45248	-	551.36	554.15	650.98	8617.38	7563.03	8555.85	4580.18	4519.23	4515.92	-	1.31064	0.00182937	14.0828	3.81586	up
T3_positive	MW0009806	Sulfanitran	Benzene and substituted derivatives	Benzene and substituted derivatives	C14H13N3O5S	336.074	335.058	2.0598	[M+H]+	19.7342	3	0.792	rp	122-16-7	5334	-	-	C71835	976.09	1558.94	1935.35	8917.97	11305.3	8917.98	5860.71	5649.72	5677.7	-	1.27861	0.00483526	6.51875	2.7046	up
T3_positive	MEDP0212	N-Acetylserotonin	Tryptamines,Cholines,Pigments	Tryptamines	C12H14N2O2	219.112	218.106	2.9724	[M+H]+	1.38139	1a	0.9054	rp	1210-83-9	903	HMDB0001238	366	C00978	4843.19	4606.68	4698.12	7654.09	6577.25	7896.89	5637.06	5632.29	5587.02	ko00380,ko01100,ko01110	1.27151	0.0200251	1.56405	0.645291	up
T3_positive	FDATP00838	Benzethonium chloride	Others	Medicine	C27H42ClNO2	448.291	447.29	7.431	[M+H]+	16.1339	3	0.5841	rp	121-54-0 | 5929-09-9 | 1313-08-2	8478	-	43587	-	44428.1	41631	43016.8	31664.8	34050.8	30305.1	38091.9	37218.9	37235.5	-	1.27131	0.00178741	0.743908	-0.426803	down
T3_positive	MW0125182	Midostaurin	Benzene and substituted derivatives	Benzene and substituted derivatives	C35H30N4O4	571.232	570.227	4.3064	[M+H]+	1.6563	3	0.7603	rp	120685-11-2	9829523	-	45414	C71714	438.45	559.74	147.79	3813.15	2339.21	2996.22	1690.64	1708.82	1691.9	-	1.22201	0.0183045	7.98319	2.99697	up
T3_positive	MW0103120	Vitamin K	CoEnzyme and vitamins	CoEnzyme and vitamins	C31H46O2	468.389	450.35	7.6784	[M+NH4]+	10.6271	3	0.776	rp	12001-79-5 | 81818-54-4 | 10485-69-5 | 27696-10-2	5280483	HMDB0015157	-	C02059	105977	102171	99591.4	83156	88354.2	81668.5	75573.6	75031.6	75503	ko00130,ko01100,ko01110,ko01240	1.25706	0.00277497	0.822704	-0.281555	down
T3_positive	MW0107537	Indole	Heterocyclic compounds	Indole and Its derivatives	C8H7N	118.065	117.058	2.569	[M+H]+	2.76334	2	0.9285	rp	120-72-9	798	HMDB0000738	286	C00463	10285	10760	8463.71	18055.9	17110.4	18331.8	10219	10695.6	10064.8	ko00380,ko00400,ko00999,ko01100,ko01110	1.27191	0.00196164	1.81296	0.858348	up
T3_positive	MEDP2143	N,N-Bis(2-hydroxyethyl)dodecanamide	FA	Others	C16H33NO3	288.253	287.246	6.628	[M+H]+	5.02689	1a	0.9155	rp	120-40-1	8430	HMDB0032358	-	C06179	6835.52	6487.44	6295.72	5777.77	4867.43	5341.19	5936.17	5942.05	5921.55	ko01100	1.15388	0.0246024	0.814856	-0.295384	down
T3_positive	MW0108639	N-Acetyl-L-glutamic acid	Amino acid and Its metabolites	Amino acid derivatives	C7H11NO5	190.071	189.064	1.415	[M+H]+	1.44803	2	0.9218	rp	1188-37-0	70914	HMDB0001138	-	C00624	157.84	206.91	233.89	2668.86	2442.28	2145.02	1161.49	1153.89	1119.88	ko00220,ko00470,ko01100,ko01110,ko01210,ko01230	1.30482	0.00398406	12.1211	3.59945	up
T3_positive	MEDN1811	4-Hydroxytoluene sulfonamide	Benzene and substituted derivatives	Benzene and substituted derivatives	C12H18N2O4S	309.087	286.099	5.0074	[M+Na]+	7.51164	1b	0.694	rp	1185112-19-9	3656	HMDB0006408	-	C00365	88.37	130.23	135.62	2647.77	2505.55	2280.45	615.1	679.19	687.19	ko00240,ko01100,ko01232	1.30636	0.00172762	20.9863	4.39138	up
T3_positive	MW0103577	Guanosine	Nucleotide and Its metabolites	Nucleotide and Its metabolites	C10H13N5O5	284.099	283.092	1.7281	[M+H]+	1.21158	2	0.9947	rp	118-00-3 | 26578-09-6 | 197227-95-5 | 103654-69-9 | 103654-70-2 | 146849-94-7 | 197227-93-3 | 202933-46-8 | 244769-87-7 | 247226-75-1 | 250586-91-5 | 250586-97-1 | 30747-23-0	135398635	-	-	C00387	12842	12452.5	12617.5	62473.6	60087	54465.2	30684.6	30867.2	30678.2	ko00230,ko01100,ko01232,ko02010	1.31008	0.00256195	4.66938	2.22323	up
T3_positive	MW0126408	Rabeprazole	Heterocyclic compounds	Heterocyclic compounds	C18H21N3O3S	359.135	359.13	3.6932	[M+]+	11.4648	3	0.6286	rp	117976-89-3	5029	HMDB0005026	-	C07864	27921.7	18689.1	17580.6	32291.4	38366.5	35988.4	28240.8	28245.4	28185.6	-	1.1322	0.0306966	1.66138	0.73238	up
T3_positive	MW0147794	Corticosterone acetate	Aldehyde,Ketones,Esters	Esters	C23H32O5	371.228	388.225	7.9829	[M+H-H2O]+	8.64076	3	0.711	rp	1173-26-8	255846	-	-	-	40479	41209.7	40161.7	24913.7	23333.4	23845.1	28973.5	29173.4	29124.3	-	1.30742	2.59138e-05	0.591645	-0.757197	down
T3_positive	MW0006368	Bis(2-ethylhexyl) phthalate	Aldehyde,Ketones,Esters	Esters	C24H38O4	279.159	390.277	7.247	[M+H]+	0.889563	2	0.9753	rp	117-81-7 | 15495-94-0 | 8033-53-2 | 50885-87-5 | 82208-43-3	8343	-	263643	C03690	559308	529967	499198	252994	337537	321107	405031	409716	408906	-	1.24534	0.00319002	0.573909	-0.801107	down
T3_positive	MW0002702	2-Aminoanthraquinone	Benzene and substituted derivatives	Benzene and substituted derivatives	C14H9NO2	224.064	223.063	6.7944	[M+H]+	11.0602	3	0.6035	rp	117-79-3	8341	-	-	-	4745.78	4831.3	4553.66	2584.1	2610.47	973.12	4535.83	5043.01	5028.5	-	1.07197	0.0365884	0.436473	-1.19603	down
T3_positive	MW0150659	Guanosine-3'-monophosphate	Nucleotide and Its metabolites	Nucleotide and Its metabolites	C10H14N5O8P	364.059	363.058	2.7449	[M+H]+	11.9408	3	0.6552	rp	117-68-0	135398727	-	-	C06193	6207.74	5339.72	6112.69	14007.1	13021.3	12664.2	8563.74	8480.6	8452.07	ko00230,ko01100	1.29981	0.00024485	2.24757	1.16837	up
T3_positive	MEDP1045	Biliverdin	Tryptamines,Cholines,Pigments	Pigments	C33H34N4O6	582.241	582.248	6.9476	[M+]+	18.7839	1b	0.7088	rp	114-25-0	5280353	HMDB0001008	-	C00500	18729.4	19975.6	14791.1	901.21	2633.18	646.69	4012.18	4037.9	4037.51	ko00860,ko01100,ko01110	1.25342	0.00391796	0.0781568	-3.67749	down
T3_positive	MW0138416	Dihydroferulic acid	Organic acid and Its derivatives	Organic acid and Its derivatives	C10H12O4	179.07	196.074	2.1211	[M+H-H2O]+	0.567206	3	0.6426	rp	1135-23-5	14340	HMDB0062121	-	-	1241.4	1313.07	1208.65	2904.15	2677.39	2120.37	1680.15	1689.21	1725.51	-	1.26465	0.0282664	2.04668	1.03329	up
T3_positive	MW0125556	N-[2-(Methylamino)ethyl]-5-isoquinolinesulfonamide dihydrochloride	Benzene and substituted derivatives	Benzene and substituted derivatives	C12H17Cl2N3O2S	283.126	337.042	0.8629	[M+NH4]+	7.97969	3	0.739	rp	113276-94-1	150584	-	45237	-	314420	285881	271043	248448	229530	227632	242515	241716	243544	-	1.17623	0.0307221	0.809796	-0.304369	down
T3_positive	MW0123581	Dexanabinol	Heterocyclic compounds	Heterocyclic compounds	C25H38O3	387.286	386.282	5.6686	[M+H]+	18.3145	3	0.6728	rp	112924-45-5	107778	-	44924	-	3762.66	3935.9	3493.63	2816.97	2808.44	3002.95	2859.11	2855.32	2878.21	-	1.2503	0.0102236	0.770927	-0.375334	down
T3_positive	MW0122177	(6aR,10aR)-9-(hydroxymethyl)-6,6-dimethyl-3-(2-methyloctan-2-yl)-6a,7,10,10a-tetrahydrobenzo[c]chromen-1-ol	Benzene and substituted derivatives	Benzene and substituted derivatives	C25H38O3	369.276	386.282	5.7901	[M+H-H2O]+	12.546	3	0.8497	rp	112830-95-2	9821569	-	85135	-	6349.11	6577.48	5493.59	5138.4	4330.68	3735.98	3752.06	3693.4	3698.37	-	1.10741	0.03123	0.71688	-0.480196	down
T3_positive	MW0124658	Lestaurtinib	Heterocyclic compounds	Heterocyclic compounds	C26H21N3O4	462.146	439.153	7.5676	[M+Na]+	13.2136	3	0.6928	rp	111358-88-4	126565	-	-	-	1643.71	3335.6	3999.88	8047.13	9560.05	12198.5	8990.58	9105.05	9220.76	-	1.18556	0.0134959	3.31942	1.73093	up
T3_positive	MW0115006	GcNeu	Organic acid and Its derivatives	Organic acid and Its derivatives	C11H19NO10	308.092	325.101	0.8645	[M+H-H2O]+	16.4457	3	0.7648	rp	1113-83-3	123802	HMDB0000833	3580	C03410	2.17066e+06	2.18602e+06	1.86979e+06	3.14804e+06	3.18726e+06	3.06488e+06	2.36925e+06	2.3709e+06	2.36939e+06	ko00520	1.27183	0.00490395	1.50971	0.594274	up
T3_positive	MW0110995	Diethanolamine	Alcohol and amines	Amines	C4H11NO2	70.0647	105.079	0.8113	[M+H-2H2O]+	1.02955	2	0.9043	rp	111-42-2	8113	HMDB0004437	3239	C06772	20781.6	20999.7	19587.3	32266.9	30567.9	30285.5	25426.8	25602	25606.8	ko00564	1.29972	0.000287513	1.51739	0.601595	up
T3_positive	MEDP1651	MG(18:1/0:0/0:0)	GL	MG	C21H40O4	357.299	356.293	7.1209	[M+H]+	0.542911	1a	0.8536	rp	111-03-5	5283468	HMDB0011566	4251	C01885	20778	30561.6	25746.5	10822.5	11219.5	11515.5	12722.2	12682	12702.6	ko00561,ko01100	1.26494	0.0352898	0.435325	-1.19983	down
T3_positive	MW0169682	Piperidine	Heterocyclic compounds	Heterocyclic compounds	C5H11N	86.096	85.0891	1.3806	[M+H]+	2.27492	3	0.7746	rp	110-89-4	8082	HMDB0034301	-	C01746	79248.9	81674.5	71914.7	71249.9	63206.8	61747.7	64379.7	64053.2	64113.8	-	1.08158	0.0426938	0.842664	-0.24697	down
T3_positive	MW0157353	Tautomycin	Heterocyclic compounds	Heterocyclic compounds	C41H66O13	749.459	766.45	8.1558	[M+H-H2O]+	10.1944	3	0.7502	rp	109946-35-2	3034761	-	-	-	7472.17	7634.21	7945.15	4436.5	3152.68	4959.21	4292.62	4254.66	4242.45	-	1.19742	0.0175999	0.544363	-0.87736	down
T3_positive	MW0062160	Pregnanetriol	Hormones and hormone related compounds	Hormones and hormone related compounds	C21H36O3	337.274	336.266	6.7263	[M+H]+	0.958987	3	0.7715	rp	1098-45-9 | 13933-75-0	101967	-	-	-	275668	285198	380561	1.19004e+06	820313	1.19846e+06	657308	659933	657222	-	1.27046	0.0202724	3.40846	1.76912	up
T3_positive	MW0017110	NCGC00386033-01_C24H38O12_3-Buten-2-one, 4-[4-hydroxy-2,2,6-trimethyl-6-[[6-O-[(2S,3R,4R)-tetrahydro-3,4-dihydroxy-4-(hydroxymethyl)-2-furanyl]-beta-D-glucopyranosyl]oxy]cyclohexylidene]-	Alcohol and amines	Alcohols	C24H38O12	501.23	518.236	2.235	[M+H-H2O]+	9.4036	3	0.5466	rp	108567-70-0	45360003	HMDB0038923	-	-	7361.78	7473.98	6623.42	17961.4	17044.1	15994	10235.5	10129.9	10199.8	-	1.3032	0.000759345	2.37658	1.24889	up
T3_positive	MW0114511	Fumagillol	Heterocyclic compounds	Heterocyclic compounds	C16H26O4	265.179	282.183	7.1025	[M+H-H2O]+	0.158691	3	0.5909	rp	108102-51-8	222778	-	85094	-	9738.92	9998.57	7538.83	5700.4	5736.65	5275.03	7316.89	7337.29	7430.04	-	1.22321	0.0415726	0.612696	-0.706758	down
T3_positive	MW0007578	Melamine	Heterocyclic compounds	Heterocyclic compounds	C3H6N6	149.059	126.065	2.1085	[M+Na]+	10.4633	3	0.7679	rp	108-78-1	7955	HMDB0041922	-	C08737	2871.09	2964.97	2576.78	7425.96	7180.79	7030.7	4528.81	4502.77	4453.32	-	1.30616	1.1452e-05	2.57196	1.36287	up
T3_positive	MEDN0651	Succinic anhydride	Organic acid and Its derivatives	Organic acid and Its derivatives	C4H4O3	101.023	100.016	1.5142	[M+H]+	1.51556	1a	0.8711	rp	108-30-5	7922	HMDB0032523	-	C19524	9547.81	10897.2	9593.16	22423.5	23409.9	22794.6	16364.4	16431.5	16433.1	-	1.30407	5.70317e-05	2.28469	1.192	up
T3_positive	MW0014197	3-Methylxanthine	Nucleotide and Its metabolites	Nucleotide and Its metabolites	C6H6N4O2	189.043	166.049	1.5543	[M+Na]+	12.2425	3	0.6178	rp	1076-22-8	70639	HMDB0001886	2820	C16357	59852.7	57853.7	56524.7	46098.9	46359.7	44074.1	36015.6	36303.4	36295.1	ko01100,ko01110	1.2899	0.000711609	0.78363	-0.351756	down
T3_positive	MEDL02021	Sarcosine	Amino acid and Its metabolites	Amino acids	C3H7NO2	90.0543	89.0477	0.7807	[M+H]+	1.72169	2	0.9739	rp	107-97-1	1088	HMDB0000271	51	C00213	36516.8	32872.9	33312.4	28985.7	25466.8	29622.7	35899.2	36123	35450.6	ko00260,ko00330,ko01100	1.13462	0.0234699	0.818631	-0.288714	down
T3_positive	MW0149253	Flusulfamide	Benzene and substituted derivatives	Benzene and substituted derivatives	C13H7Cl2F3N2O4S	414.953	413.946	8.7846	[M+H]+	1.60606	3	0.6139	rp	106917-52-6	86268	-	-	C18521	67151	56289.9	58882.2	40564.8	36677.7	38498.3	43453	42622.4	43467	-	1.26656	0.0135917	0.634811	-0.6556	down
T3_positive	MW0169780	Risperidone	Aldehyde,Ketones,Esters	Ketones	C23H27FN4O2	198.091	410.212	4.9547	[M+Na]+	1.57216	3	0.7577	rp	106266-06-2	5073	HMDB0005020	2348	C06861	187.76	340.62	247.25	2016.08	2168.05	1605.56	913.28	861.71	901.88	-	1.28814	0.00683405	7.4645	2.90005	up
T3_positive	MW0012230	12-Hydroxystearic acid	FA	FFA	C18H36O3	265.252	300.266	7.1284	[M+H-2H2O]+	0.0939675	3	0.7201	rp	106-14-9	7789	HMDB0061706	-	-	20691.9	26535.2	21767.4	5469.77	10248	10331.6	10746	10809.1	10715.8	-	1.20152	0.00418351	0.377558	-1.40523	down
T3_positive	MW0125658	N-benzyl-1-methyl-1H-pyrazolo[3,4-d]pyrimidin-4-amine	Benzene and substituted derivatives	Benzene and substituted derivatives	C13H13N5	240.123	239.117	1.9552	[M+H]+	0.10156	3	0.8561	rp	105903-56-8	219778	-	96288	-	5884.7	4338.14	4481.21	689.5	1070.54	795.02	3082.48	3151.08	3156.65	-	1.29186	0.011315	0.173766	-2.52478	down
T3_positive	MW0012533	16Z,19Z,22Z,25Z,28Z,31Z-tetratriacontahexaenoic acid	FA	FFA	C34H56O2	497.424	496.428	8.4509	[M+H]+	22.6755	3	0.6222	rp	105528-06-1	52921817	-	74378	-	21567	23682.7	24493.6	18751.7	19831.3	21199.7	19532.7	19589.4	19586.1	-	1.08716	0.043981	0.857182	-0.222327	down
T3_positive	MW0127748	6-Glucopyranosyl-(+)-catechin	Flavonoids	Flavonoid	C21H24O11	453.138	452.132	1.0848	[M+H]+	7.38319	3	0.5047	rp	105371-27-5	59010767	HMDB0037400	-	-	1840.94	2730.3	3414.7	12961.5	17772.3	15838.6	8848.22	8856.97	8857.42	-	1.2787	0.00688962	5.83181	2.54394	up
T3_positive	MW0007543	Malonoben	Benzene and substituted derivatives	Benzene and substituted derivatives	C18H22N2O	283.175	282.173	7.9951	[M+H]+	14.9903	3	0.68	rp	10537-47-0	5614	HMDB0031799	-	C19039	77214.6	73736.1	73701.7	47373.1	38937.6	46321.4	45365.9	44103.8	43542.2	-	1.27335	0.00264782	0.590388	-0.760264	down
T3_positive	MW0193988	3-Dehydroquinic acid	Organic acid and Its derivatives	Organic acid and Its derivatives	C7H10O6	237.064	190.048	1.1065	[M+HCOO+2H]+	7.525	3	0.8592	rp	10534-44-8	439351	HMDB0012710	-	C00944	4036.46	3713.96	3037.03	15305.2	16838.3	17530.8	11458.2	11650.6	11646.1	ko00400,ko01100,ko01110,ko01230	1.30223	0.00059359	4.60483	2.20315	up
T3_positive	MW0053460	ganoderol A	Alcohol and amines	Alcohols	C30H46O2	438.352	438.35	6.9363	[M+]+	5.01614	3	0.7272	rp	104700-97-2	13934284	HMDB0035728	-	-	125635	115844	98734.6	69923.4	78881.5	61399.5	74117.9	74169.6	75124.4	-	1.21195	0.0141571	0.61786	-0.694647	down
T3_positive	MW0103346	2'-Deoxyguanosine-5'-diphosphate	Nucleotide and Its metabolites	Nucleotide and Its metabolites	C10H15N5O10P2	428.037	427.029	1.9028	[M+H]+	0.28035	3	0.7747	rp	102783-74-4	135398595	HMDB0000960	3532	C00361	14879.1	13851.4	12670.6	9499.18	5065.01	7556.94	14537.2	14296.3	14526.6	ko00230,ko01100,ko01232	1.13185	0.0217159	0.534313	-0.904243	down
T3_positive	MEDN1035	13(R)-HODE	FA	Oxidized lipids	C18H32O3	297.243	296.235	6.6047	[M+H]+	2.10819	2	0.817	rp	10219-69-9	13723970	-	-	-	9824.72	10607.6	9405.35	13649.5	13711.1	11592.9	12066.2	11771	12240	-	1.17457	0.03072	1.30551	0.384617	up
T3_positive	MEDP0535	TRIETHYL PHOSPHATE	Organic acid and Its derivatives	Phosphoric acids	C6H15O4P	182.081	182.071	1.5888	[M+]+	24.0175	1b	0.7476	rp	-	6535	HMDB0259191	-	-	4171.38	4358.21	3637.53	1091.65	630.68	986.09	1835.52	1733.73	1820.79	-	1.27598	0.000601453	0.222602	-2.16746	down
T3_positive	MEDP1799	Quinaldic acid	Organic acid and Its derivatives	Organic acid and Its derivatives	C10H7NO2	174.058	173.048	2.7098	[M+H]+	6.51833	1b	0.6944	rp	-	7124	HMDB0000842	5805	C06325	347.45	401.81	146.56	1683.89	1154.98	1882.86	823.56	798.28	834.18	-	1.21874	0.0184878	5.27085	2.39803	up
T3_positive	FDATN01404	Arginine Hydrochloride	Others	Medicine	C6H15ClN4O2	175.119	210.088	0.7119	[M+H]+	1.64181	2	0.9601	rp	-	66250	HMDB0303361	-	-	158536	161453	136080	245736	229928	239237	208254	209246	208236	-	1.27226	0.00203339	1.56753	0.648489	up
T3_positive	MW0147450	Choline sulfate	Organic acid and Its derivatives	Phosphoric acids	C5H13NO4S	405.076	183.056	0.8061	[2M+K]+	0.345614	2	0.957	rp	-	485	HMDB0250194	-	C00919	13506.1	19437.5	8944.51	120.04	1119.61	1390.36	1268.82	1502.69	1462.11	ko02010	1.16754	0.0478532	0.0627865	-3.9934	down
T3_positive	MEDP1022	Thr-Phe	Amino acid and Its metabolites	Small Peptide	C13H18N2O4	267.134	266.127	2.5866	[M+H]+	1.82403	2	0.9437	rp	-	4099799	HMDB0029068	-	-	20292.6	22079.3	18177.8	8789.04	8126.01	8779.28	12792.3	12641.2	12617.9	-	1.29792	0.00750359	0.424352	-1.23667	down
T3_positive	MW0145362	Arg-Gly-Ile	Amino acid and Its metabolites	Small Peptide	C14H28N6O4	345.224	344.217	1.415	[M+H]+	1.54752	2	0.9437	rp	-	145453822	-	19808	-	16679.4	20765.1	15831.4	3318.05	3847.69	3797.52	8601.7	8651.6	8660.89	-	1.30294	0.010734	0.205783	-2.28081	down
T3_positive	MW0158390	Tyr-Asn-Asp-Lys	Amino acid and Its metabolites	Small Peptide	C23H34N6O9	539.243	538.239	2.0772	[M+H]+	3.77003	2	0.9368	rp	-	-	-	259927	-	179.77	870.79	216.76	6815	4557.07	4265.98	2860.15	2813.8	2846.49	-	1.22841	0.0207805	12.3395	3.62521	up
T3_positive	MW0151445	Ile-His-Arg-Arg	Amino acid and Its metabolites	Small Peptide	C24H44N12O5	581.366	580.356	7.1715	[M+H]+	3.67378	2	0.9366	rp	-	-	-	162173	-	19424.5	19394.7	21222.7	12820.3	14921.2	10231.9	13634.1	13596	13610.2	-	1.18406	0.019097	0.632448	-0.660981	down
T3_positive	MW0110280	Tyr-Cys	Amino acid and Its metabolites	Small Peptide	C12H16N2O4S	284.081	284.083	1.5194	[M+]+	1.33769	2	0.9357	rp	-	18642383	HMDB0029102	24025	-	29592.6	32906.2	27035.2	43247.9	50345.6	45492.6	33336.7	33485.2	33452.8	-	1.24509	0.00412204	1.55344	0.63547	up
T3_positive	MEDP1024	Leu-Val	Amino acid and Its metabolites	Small Peptide	C11H22N2O3	231.17	230.163	2.2701	[M+H]+	0.615732	2	0.9348	rp	-	6993115	HMDB0029131	-	-	141.2	362.71	129.3	9768.1	9339.86	8977.57	4400.79	4402.52	4446.05	-	1.29364	0.000193473	44.3542	5.471	up
T3_positive	MW0159003	Val-Glu-Tyr-His-Gln	Amino acid and Its metabolites	Small Peptide	C30H42N8O10	675.306	674.302	1.3977	[M+H]+	0.667722	2	0.9342	rp	-	-	-	264177	-	2715.59	5935.42	2716.1	18305.8	15468.3	13768.8	6586.98	6738.94	6958.06	-	1.23253	0.00245831	4.1825	2.06437	up
T3_positive	MW0110082	Trp-Thr	Amino acid and Its metabolites	Small Peptide	C15H19N3O4	306.145	305.138	2.7274	[M+H]+	0.881402	2	0.9316	rp	-	17773480	HMDB0029093	23712	-	5205.53	7123.09	6854.83	3092.43	3668.73	3204.42	4831.05	4834.15	4894.74	-	1.24208	0.0280413	0.519488	-0.944837	down
T3_positive	MW0153067	Lys-Lys-Ser	Amino acid and Its metabolites	Small Peptide	C15H31N5O5	362.241	361.233	3.2297	[M+H]+	3.93497	2	0.9296	rp	-	145456721	-	21035	-	3167.12	3007.43	3609.02	1721.33	2560.28	2361.43	2565.75	2564.27	2535.68	-	1.09547	0.0327821	0.679	-0.558517	down
T3_positive	MW0153592	Met-Leu-Arg-Ala-Ala	Amino acid and Its metabolites	Small Peptide	C23H44N8O6S	561.324	560.311	2.3405	[M+H]+	4.27621	2	0.9248	rp	-	-	-	264186	-	4279.25	6927.32	2927.91	18218.2	12005.9	10751.2	8270.77	8227.83	8204.46	-	1.15591	0.0414383	2.89896	1.53554	up
T3_positive	MW0109640	Ser-Tyr-Arg	Amino acid and Its metabolites	Small Peptide	C18H28N6O6	425.215	424.207	7.4366	[M+H]+	4.633	2	0.9247	rp	-	145457910	-	18195	-	416575	386399	361088	238976	275494	250694	317004	313742	316661	-	1.26543	0.00376256	0.657323	-0.605326	down
T3_positive	MW0162988	O-acetylhomoserine	Aldehyde,Ketones,Esters	Esters	C6H11NO4	144.065	161.069	0.8146	[M+H-H2O]+	1.025	2	0.9225	rp	-	25244888	-	-	-	33518.9	32080.9	26654.1	49622.9	44678.2	45119.7	40947.4	40862.7	40175.9	-	1.23009	0.00486886	1.51127	0.595762	up
T3_positive	MW0158503	Tyr-Ile-Lys-Lys	Amino acid and Its metabolites	Small Peptide	C27H46N6O6	551.355	550.348	7.4562	[M+H]+	5.87026	2	0.9207	rp	-	-	-	258447	-	9374.58	8265.28	11947.7	3891.44	2721.2	5921.63	5428.23	5521.46	5534.9	-	1.14335	0.0174843	0.423633	-1.23911	down
T3_positive	MW0150832	His-Arg-Asn	Amino acid and Its metabolites	Small Peptide	C16H27N9O5	426.218	425.214	7.4338	[M+H]+	6.35273	2	0.9153	rp	-	145455745	-	19899	-	89275.6	81095.9	77429.6	51947.1	59848.9	54434.6	68529.8	67792.1	68558.2	-	1.2601	0.00469506	0.670823	-0.575996	down
T3_positive	MW0144018	8,12-iso-iPF2-VI 1,5- lactone	Others	Others	C20H32O4	337.236	336.23	7.8966	[M+H]+	4.01266	2	0.9143	rp	-	-	-	45412	-	18953.5	13962.8	11751.6	4626.81	2471.55	5046.82	9456.96	9732.16	9837.48	-	1.21579	0.0251079	0.271899	-1.87886	down
T3_positive	MW0155777	Pro-Arg-Gln	Amino acid and Its metabolites	Small Peptide	C16H29N7O5	400.23	399.223	3.5296	[M+H]+	0.64299	2	0.9109	rp	-	145457384	-	18604	-	112.76	39.34	189.78	14833.2	10006.5	8660.07	4489.17	4462.58	4451.67	-	1.28526	0.0275115	97.9869	6.61452	up
T3_positive	MW0002287	2,4-Dinitrophenol	Benzene and substituted derivatives	Phenolics	C6H4N2O5	391.014	184.012	8.9371	[2M+Na]+	1.65	2	0.9099	rp	-	1493	HMDB0245462	-	C02496	34957.9	30921.2	28764	26400.5	17592.7	20969.2	27413.4	27668.1	26488.7	-	1.0831	0.0399718	0.686394	-0.54289	down
T3_positive	MW0151118	His-Trp-Trp	Amino acid and Its metabolites	Small Peptide	C28H29N7O4	528.237	527.228	5.7052	[M+H]+	3.50986	2	0.9096	rp	-	11570015	-	16230	-	5957.44	4023.02	3815.84	8557.04	8973.75	8120.05	5293.79	5360.01	5256.75	-	1.19656	0.0189295	1.85926	0.894725	up
T3_positive	MW0153035	Lys-Leu-Glu-Arg	Amino acid and Its metabolites	Small Peptide	C23H44N8O7	545.341	544.333	8.7294	[M+H]+	0.55924	2	0.9045	rp	-	-	-	171153	-	51068.9	52137.7	123268	401024	553062	316931	296893	298340	274196	-	1.2286	0.0268989	5.61219	2.48856	up
T3_positive	MW0006883	Dioctyl phthalate	Benzene and substituted derivatives	Benzene and substituted derivatives	C24H38O4	391.284	390.277	8.1268	[M+H]+	4.30919	2	0.9031	rp	-	8346	HMDB0251427	-	C14227	30524.5	19137.2	38473.4	13765.6	3357.66	4340.19	20858.9	20989.2	20992.3	-	1.1165	0.0373898	0.243529	-2.03784	down
T3_positive	MW0152344	Leu-Gly-His-Phe-Met	Amino acid and Its metabolites	Small Peptide	C28H41N7O6S	604.294	603.284	2.2438	[M+H]+	0.529769	2	0.9031	rp	-	-	-	264350	-	140.02	378.25	439.54	7403.05	4789.53	3644.12	2404.63	2409.88	2329.09	-	1.26113	0.0459494	16.5343	4.04739	up
T3_positive	MEDP1025	2-[(2-Amino-3-phenylpropanoyl)amino]-3-methylbutanoic acid	Amino acid and Its metabolites	Amino acid derivatives	C14H20N2O3	265.154	264.147	3.3246	[M+H]+	0.848682	2	0.9025	rp	-	4096934	HMDB0029134	-	-	2886.72	2981.42	2492.35	402.16	411.11	384.15	1479.32	1433.88	1420.62	-	1.30985	0.00382961	0.143224	-2.80366	down
T3_positive	MW0158353	Tyr-Ala-Glu-Leu-Arg	Amino acid and Its metabolites	Small Peptide	C29H46N8O9	651.341	650.339	3.4385	[M+H]+	6.97151	2	0.902	rp	-	-	-	264972	-	119.16	212	75.73	4696.79	2322.03	2828.56	887.65	924.04	893.11	-	1.28087	0.0484344	24.2016	4.59703	up
T3_positive	MEDP1345	LPC(18:3/0:0)	GP	LPC	C26H48NO7P	518.324	517.317	6.5297	[M+]+	1.89653	2	0.8659	rp	-	24779469	HMDB0010388	-	C00157	126430	80712.7	124237	645023	328171	597443	321106	317034	316186	ko00564,ko00590,ko00592,ko01100,ko01110	1.24576	0.0497094	4.73969	2.24479	up
T3_positive	MEDP1292	3'-Dephosphocoenzyme A	CoEnzyme and vitamins	CoEnzyme and vitamins	C21H35N7O13P2S	688.156	687.6	2.5167	[M+H]+	1.39387	2	0.8612	rp	-	642	-	-	-	3843.55	2630.88	6321.12	28961.5	24896.6	24932	16813.2	16716.6	16672.7	-	1.2654	0.000287159	6.15762	2.62237	up
T3_positive	MEDP1247	1-Deoxyvaleric-acid	Organic acid and Its derivatives	Organic acid and Its derivatives	C15H22O2	235.169	234.162	7.0594	[M+H]+	0.954765	2	0.8587	rp	-	71448993	-	-	C20404	5655	5327.98	4424.27	2772.49	4140.41	2876.23	4223.02	4193.63	4236.71	ko01100,ko01110	1.11216	0.032319	0.635359	-0.654357	down
T3_positive	MEDP0638	LPE(16:1/0:0)	GP	PE	C21H42NO7P	452.277	451.27	6.6394	[M+H]+	1.09905	2	0.857	rp	-	52925129	HMDB0011504	-	C00350	18090.9	12437.7	29673	60547.6	99887.4	69845.4	46445.8	46445	46349.9	ko00563,ko00564,ko01100,ko01110,ko04136,ko04138	1.20644	0.0269892	3.82515	1.93552	up
T3_positive	MEDP1902	LPC(16:2/0:0)	GP	LPC	C24H46NO7P	492.308	491.301	6.4054	[M+H]+	1.34171	2	0.8562	rp	-	154573513	-	-	C00157	29547.8	15845.2	43072.9	88453	52448.3	92584.8	49906.8	49161.5	49117.8	ko00564,ko00590,ko00592,ko01100,ko01110	1.0908	0.041666	2.63928	1.40014	up
T3_positive	MW0151666	Ile-Asp	Amino acid and Its metabolites	Small Peptide	C10H18N2O5	247.128	246.122	2.3931	[M+H]+	1.97915	2	0.8346	rp	-	14304554	HMDB0028903	23843	-	346.45	376.77	218.43	3113.51	4380	3464.43	774.39	782.16	729.79	-	1.29486	0.011524	11.637	3.54064	up
T3_positive	MW0013473	2-Hexadecenal	FA	Others	C16H30O	239.237	238.23	8.1558	[M+H]+	1.19112	2	0.8139	rp	-	5280541	HMDB0060482	-	C06123	21688.2	23771.4	22260.1	16369	15899.6	17168.2	15508	15611.9	15527.2	-	1.27924	0.00254239	0.73002	-0.453992	down
T3_positive	MW0110238	L-Tyrosyl-L-Asparagine	Amino acid and Its metabolites	Amino acid derivatives	C13H17N3O5	334.072	295.117	1.9028	[M+K]+	18.776	2	0.8048	rp	-	44230566	HMDB0029100	-	-	31996.4	34984.4	36717.6	28188.4	16853	19835.3	29441.1	29359.2	29378.6	-	1.10101	0.047036	0.625629	-0.676622	down
T3_positive	MW0145662	Asn-Ala-Leu-Ala-His	Amino acid and Its metabolites	Small Peptide	C22H36N8O7	525.277	524.271	7.0569	[M+H]+	3.71288	3	0.8999	rp	-	-	-	264071	-	8630.33	8013.67	8899.22	20666.4	15473.6	19592.4	12562.8	12702.8	12245.6	-	1.27709	0.0214481	2.18189	1.12558	up
T3_positive	MW0152508	Leu-Thr-Gln-Gln-Leu	Amino acid and Its metabolites	Small Peptide	C26H47N7O9	602.35	601.343	7.464	[M+H]+	1.35447	3	0.8992	rp	-	-	-	264998	-	206669	211156	174629	111836	66813.9	74785.8	29920.4	29735.2	29748	-	1.22217	0.00369058	0.427772	-1.22509	down
T3_positive	MW0155408	Phe-Val-His-Arg	Amino acid and Its metabolites	Small Peptide	C26H39N9O5	558.315	557.307	5.8791	[M+H]+	1.00025	3	0.899	rp	-	-	-	142413	-	1831.53	2403.43	4040.14	21710.9	16740.7	23903.2	9524.99	9218.15	9472.79	-	1.27467	0.00859858	7.53523	2.91365	up
T3_positive	MW0146271	Asp-Thr-Gln-Arg	Amino acid and Its metabolites	Small Peptide	C19H34N8O9	519.259	518.245	2.2526	[M+H]+	8.36467	3	0.8972	rp	-	-	-	126154	-	2192.83	3060.46	2165.59	8844.83	7182.01	6459.73	4076.79	3971.24	4086.47	-	1.26953	0.010169	3.03099	1.59979	up
T3_positive	MW0153010	Lys-Ile-Glu-Arg	Amino acid and Its metabolites	Small Peptide	C23H44N8O7	545.341	544.333	7.2488	[M+H]+	2.01918	3	0.8967	rp	-	-	-	170353	-	234998	265079	342665	992407	927706	1.28038e+06	710998	659851	681626	-	1.28183	0.0129114	3.79771	1.92513	up
T3_positive	MW0149848	Gln-Tyr-Tyr	Amino acid and Its metabolites	Small Peptide	C23H28N4O7	473.201	472.196	3.6052	[M+H]+	1.99251	3	0.8944	rp	-	145455265	-	16871	-	349.49	603.06	135.21	3313.6	1976.77	2306.14	992.29	975.67	978.97	-	1.20073	0.0233714	6.98363	2.80398	up
T3_positive	MW0153190	Lys-Tyr-Val-Lys	Amino acid and Its metabolites	Small Peptide	C26H44N6O6	537.34	536.332	7.1715	[M+H]+	1.43309	3	0.8912	rp	-	-	-	175427	-	22808.2	21180.5	23888.5	13522.1	13609.2	11079.9	15420.6	15371.3	15368.4	-	1.26984	0.000994021	0.562946	-0.828931	down
T3_positive	MW0158427	Tyr-Cys-Trp	Amino acid and Its metabolites	Small Peptide	C23H26N4O5S1	471.167	470.162	7.137	[M+H]+	5.41894	3	0.8901	rp	-	145458611	-	22208	-	51431.7	62471.5	55175.2	27075.2	22122.6	29987.1	12215.3	12036.8	11911.6	-	1.26223	0.00248417	0.468332	-1.0944	down
T3_positive	MW0155781	Pro-Arg-Leu	Amino acid and Its metabolites	Small Peptide	C17H32N6O4	385.257	384.248	8.1558	[M+H]+	5.05807	3	0.8873	rp	-	145457388	-	21719	-	15892	13849.4	12557.2	7561.32	7228.83	6580.26	7855.91	7930.02	8250.88	-	1.27763	0.0131499	0.505227	-0.984995	down
T3_positive	MW0145452	Arg-Met-Met	Amino acid and Its metabolites	Small Peptide	C16H32N6O4S2	437.194	436.193	6.5529	[M+H]+	13.519	3	0.8858	rp	-	145453897	-	20926	-	7.08088e+06	6.72247e+06	5.79259e+06	5.59956e+06	4.54142e+06	5.07136e+06	3.45366e+06	3.42989e+06	3.47741e+06	-	1.08454	0.0434192	0.776301	-0.365313	down
T3_positive	MW0011509	(E)-26,27-Dinorergosta-4,22-dien-3-one	Aldehyde,Ketones,Esters	Ketones	C26H40O	369.311	368.308	7.0336	[M+H]+	9.91287	3	0.8855	rp	-	131752242	HMDB0037826	-	-	37933.4	46385	36048.6	19620	20189.1	19100.9	24913	24941.8	24977.9	-	1.28137	0.0223459	0.489421	-1.03085	down
T3_positive	MW0158979	Val-Glu-Arg-Gln-Val	Amino acid and Its metabolites	Small Peptide	C26H47N9O9	630.364	629.35	3.4297	[M+H]+	8.53376	3	0.8843	rp	-	-	-	265024	-	168.18	14.32	53.69	7741.48	4483.51	4776.36	1999.59	1914.23	1931.66	-	1.25288	0.0327519	71.9817	6.16956	up
T3_positive	MW0107803	Leu-Ser	Amino acid and Its metabolites	Small Peptide	C9H18N2O4	459.242	218.127	1.9902	[2M+Na]+	1.35005	3	0.8826	rp	-	6992130	HMDB0028938	23974	-	306.25	585.81	413.87	5333.76	3145.23	4137.31	1867.64	1708.01	1856.26	-	1.28478	0.0254285	9.66078	3.27214	up
T3_positive	MW0051263	1,2-Dioctanoyl-sn-glycerol	GL	DG	C19H36O5	367.246	344.256	8.1558	[M+Na]+	2.28821	3	0.8816	rp	-	148879	HMDB0116368	-	C00641	38493.5	35260.9	33163	21271.8	19743.8	21334.3	23094.2	23557.3	23527.3	ko00561,ko00562,ko00564,ko01100,ko01110,ko04070	1.28897	0.00608642	0.58316	-0.778035	down
T3_positive	MW0156808	Ser-Leu-Ala	Amino acid and Its metabolites	Small Peptide	C12H23N3O5	290.171	289.164	2.1396	[M+H]+	1.70509	3	0.8809	rp	-	101930626	-	16699	-	6770.13	7171.39	6183.15	5652.4	4540.93	4033.69	5290.7	5291.36	5262.4	-	1.12001	0.0336647	0.706944	-0.500332	down
T3_positive	MW0124747	Mangiferin	Aldehyde,Ketones,Esters	Ketones	C19H18O11	423.096	422.085	3.2368	[M+H]+	9.41312	3	0.8805	rp	-	5281647	HMDB0302730	-	C10077	5303.31	5034.43	3850.35	13523.1	14478.4	16060.8	8405.04	8418.32	8418.41	-	1.28785	0.000907936	3.10558	1.63486	up
T3_positive	MW0153166	Lys-Trp-Phe	Amino acid and Its metabolites	Small Peptide	C26H33N5O4	480.263	479.253	2.2616	[M+H]+	1.16961	3	0.8794	rp	-	10116644	-	19429	-	58.6	19.9	89.2	25992.1	16901.7	14530.4	8110.88	8145.35	8134.85	-	1.29576	0.0318991	342.422	8.41963	up
T3_positive	MW0114175	D-Arabinono-1,4-lactone	Aldehyde,Ketones,Esters	Esters	C5H8O5	171.028	148.037	1.4285	[M+Na]+	4.825	3	0.8785	rp	-	17723	HMDB0302833	-	C00652	945.69	482.08	959.35	6140.14	5597.3	6181	3761.58	3743.35	3721.86	ko00053,ko01100	1.28114	3.79804e-05	7.5063	2.9081	up
T3_positive	MW0156967	Ser-Val-Ala	Amino acid and Its metabolites	Small Peptide	C11H21N3O5	276.145	275.148	1.5194	[M+H]+	0.261055	3	0.8723	rp	-	145457925	-	20811	-	18566.7	20882.5	15752	11805.1	9391.08	10099.7	5993.03	5983.59	5970.67	-	1.22681	0.0184305	0.566941	-0.818728	down
T3_positive	MW0156753	Ser-Gly-Glu-Leu-His	Amino acid and Its metabolites	Small Peptide	C22H35N7O9	542.261	541.25	6.1546	[M+H]+	2.6733	3	0.8707	rp	-	-	-	264153	-	40910.5	39250.8	39981.3	35418.3	35437.1	38111.9	24884.9	24858.2	24584	-	1.14629	0.0338231	0.906983	-0.140853	down
T3_positive	MW0156042	Pro-Val-Ala-Glu-Val	Amino acid and Its metabolites	Small Peptide	C23H39N5O8	514.29	513.28	6.4141	[M+H]+	0.0301025	3	0.8706	rp	-	-	-	264192	-	10556.9	6119.7	15482.2	37455.3	21248.2	34378.4	20405.9	19607.2	20507.9	-	1.13602	0.0353186	2.89445	1.53329	up
T3_positive	MW0004443	Bis(4-cyanophenyl)methanol	Benzene and substituted derivatives	Benzene and substituted derivatives	C15H10N2O	235.087	234.079	4.8846	[M+H]+	0.0850577	3	0.869	rp	-	10466550	HMDB0061037	-	-	9450.44	10301.5	8144.92	38412.9	36905.1	36925.4	20414.3	20368.2	20384.6	-	1.30566	6.35364e-06	4.02351	2.00845	up
T3_positive	MW0158728	Tyrosylserine	Amino acid and Its metabolites	Amino acid derivatives	C12H16N2O5	268.111	268.106	2.4108	[M+]+	14.2	3	0.867	rp	-	18218253	HMDB0029114	-	-	32682.9	34306	29848.1	37623.4	39651.8	39296.7	17333	17591.8	17252.5	-	1.18633	0.0217519	1.2038	0.26759	up
T3_positive	MW0157716	Thr-Leu-Val-Arg	Amino acid and Its metabolites	Small Peptide	C21H41N7O6	488.313	487.312	6.9304	[M+H]+	11.9843	3	0.866	rp	-	-	-	235433	-	1377.18	599.53	2784.78	12762.6	9462.03	12021.3	7458.32	7441.94	7260.21	-	1.20987	0.00227334	7.19228	2.84645	up
T3_positive	MW0144468	Ala-Arg-Asp-Glu-Thr	Amino acid and Its metabolites	Small Peptide	C22H38N8O11	591.274	590.266	2.9902	[M+H]+	2.95755	3	0.8657	rp	-	-	-	264836	-	657.42	2134.81	854.42	5322.19	3963.84	4910.94	2673.7	2641.65	2640.15	-	1.17701	0.00486265	3.89315	1.96094	up
T3_positive	MW0152982	Lys-His-Ala-Val-Ser	Amino acid and Its metabolites	Small Peptide	C23H40N8O7	541.309	540.302	6.5222	[M+H]+	5.2964	3	0.865	rp	-	-	-	264878	-	9612.03	4295.25	10772.9	71872	33912.4	63126.6	28926.2	28442.1	28900.2	-	1.22861	0.0488122	6.844	2.77484	up
T3_positive	MW0104919	Dihydroxyphenylalanine	Amino acid and Its metabolites	Amino acid derivatives	C9H11NO4	215.102	197.069	1.3468	[M+NH4]+	1.025	3	0.863	rp	-	6971033	HMDB0000181	-	-	4360.93	4220.6	3298.77	13203.5	17776.1	13964.2	9518.07	9345.21	9508.22	-	1.28745	0.0125234	3.78305	1.91955	up
T3_positive	MW0158614	Tyr-Thr-Ala	Amino acid and Its metabolites	Small Peptide	C16H23N3O6	354.164	353.159	3.275	[M+H]+	5.08828	3	0.8564	rp	-	145458764	-	17633	-	340.26	64.46	297.24	5352.57	4315.19	4142.67	1970.84	1883.68	1976.53	-	1.24354	0.00542622	19.6741	4.29823	up
T3_positive	MW0158610	Tyr-Ser-Phe-Val-Phe	Amino acid and Its metabolites	Small Peptide	C35H43N5O8	662.315	661.311	3.0609	[M+H]+	4.70706	3	0.8544	rp	-	-	-	264114	-	122.61	338.57	289.92	6201.9	4104.84	2969.29	1600.71	1594.8	1543.19	-	1.26966	0.047168	17.6754	4.14367	up
T3_positive	MW0117861	2,3-Methylenedioxymethcathinone	Aldehyde,Ketones,Esters	Ketones	C11H13NO3	190.089	207.089	6.2779	[M+H-H2O]+	7.18086	3	0.8521	rp	-	91693796	-	96734	-	48324.8	52367.9	48800.4	42205.6	39144.7	34244	41263.3	41409.1	40805.7	-	1.16987	0.0219359	0.773241	-0.37101	down
T3_positive	MW0152336	Leu-Gly-Ala-Pro-Gly	Amino acid and Its metabolites	Small Peptide	C18H31N5O6	414.235	413.227	2.6391	[M+H]+	3.90573	3	0.852	rp	-	-	-	264176	-	3801.78	3626.55	3242.23	1145.74	1405.29	1009.79	4037.73	4506.79	3952.17	-	1.28958	0.000545753	0.333705	-1.58335	down
T3_positive	MW0124143	Fluphenazine sulfoxide	Heterocyclic compounds	Heterocyclic compounds	C22H26F3N3O2S	454.171	453.17	6.5644	[M+H]+	13.8221	3	0.8513	rp	-	3036919	HMDB0252402	-	-	144818	138491	127070	121895	105537	107883	83637.9	82815.5	83732.9	-	1.13117	0.026418	0.817084	-0.291444	down
T3_positive	MW0151929	Juvenile hormone III acid	Hormones and hormone related compounds	Hormones and hormone related compounds	C15H24O3	253.179	252.173	6.8963	[M+H]+	1.35	3	0.8493	rp	-	23724771	-	-	-	4109.04	4133.72	2408.04	1149.41	1772.26	461.84	1055.88	1430.67	1337.4	-	1.08267	0.0304066	0.317677	-1.65437	down
T3_positive	MW0150486	Gly-Thr-Asp	Amino acid and Its metabolites	Small Peptide	C10H17N3O7	292.118	291.107	2.4714	[M+H]+	10.4991	3	0.8489	rp	-	145455690	-	17905	-	7291.55	5910.07	4956.72	573.96	1653.65	1799.56	3284.97	3290.75	3339.71	-	1.1863	0.00772026	0.221781	-2.17279	down
T3_positive	MW0058181	1-(9Z-heptadecenoyl)-sn-glycero-3-phosphoethanolamine	GP	PE	C22H44NO7P	466.301	465.286	7.9484	[M+H]+	16.8707	3	0.848	rp	-	42607464	-	46714	C00350	3980.7	3031.33	3657.71	691.13	1671.25	1788.22	3225.05	3175.15	3293.7	ko00563,ko00564,ko01100,ko01110,ko04136,ko04138	1.11762	0.00920606	0.389007	-1.36213	down
T3_positive	MW0014149	7-[(2R)-3-hydroxy-2-(3-hydroxy-5-methylnon-1-enyl)-5-oxocyclopentyl]-3-methoxyheptanoic acid	Organic acid and Its derivatives	Organic acid and Its derivatives	C23H40O6	395.277	412.283	7.1888	[M+H-H2O]+	2.99685	3	0.845	rp	-	57370058	-	45111	-	273118	378212	328932	39060.4	77099.1	63646	114551	117086	115673	-	1.27205	0.00683366	0.183426	-2.44673	down
T3_positive	MW0014120	3-Hydroxysintaxanthin	Aldehyde,Ketones,Esters	Ketones	C31H42O2	429.319	446.318	7.6886	[M+H-H2O]+	8.27493	3	0.8444	rp	-	131751826	HMDB0035641	-	-	107669	88276.1	95835.1	70733.2	80025.7	80663.6	69182.9	68954.3	69699.2	-	1.11575	0.0495327	0.793139	-0.334355	down
T3_positive	MW0169366	D-Kynurenine	Amino acid and Its metabolites	Amino acid derivatives	C10H12N2O3	255.097	208.085	1.9815	[M+HCOO+2H]+	0.6	3	0.8417	rp	-	846	HMDB0250769	-	C01718	540.51	744.25	768.19	5000.79	3406.58	3557.34	1888.38	1882.5	1882.44	-	1.29043	0.0210812	5.82806	2.54302	up
T3_positive	MW0159076	Val-Leu-Ser-Pro-Ala	Amino acid and Its metabolites	Small Peptide	C22H39N5O7	486.291	485.285	2.5778	[M+H]+	3.32492	3	0.8351	rp	-	-	-	264319	-	412.31	623.8	187.37	3352.56	2846.82	2614.2	1345.14	1379	1380.81	-	1.24012	0.00157838	7.2037	2.84874	up
T3_positive	MW0149705	Gln-His-Phe-Arg	Amino acid and Its metabolites	Small Peptide	C26H38N10O6	587.311	586.298	2.5844	[M+H]+	12.9218	3	0.8297	rp	-	-	-	209973	-	3725.45	3901.67	5003.98	50239.3	34020.6	33934.6	18232	18285.9	18226.8	-	1.29955	0.0224205	9.35742	3.22611	up
T3_positive	MW0131127	Irigenin, dibenzyl ether	Flavonoids	Isoflavones	C32H28O8	541.174	540.178	1.3126	[M+H]+	20.331	3	0.8292	rp	-	6710674	-	43995	-	38354.7	28418.7	44910.2	89099.4	79074.5	87289.1	64410.8	65632.3	64779.2	-	1.24692	0.00213323	2.28738	1.1937	up
T3_positive	MW0124337	Radafaxine	Heterocyclic compounds	Heterocyclic compounds	C13H18ClNO2	256.118	255.103	1.3271	[M+H]+	17.8273	3	0.8291	rp	-	9837966	HMDB0257092	-	-	13286.3	11732.8	7514.7	2877.42	2798.78	2296.66	7489.59	7688.44	7705.2	-	1.26694	0.0402828	0.245063	-2.02877	down
T3_positive	MW0151083	His-Ser-Leu-Ser-Glu	Amino acid and Its metabolites	Small Peptide	C23H37N7O10	572.272	571.26	2.9724	[M+H]+	6.42316	3	0.8274	rp	-	-	-	264255	-	147.21	251.75	89.11	7801.48	5022.58	5669.34	2752.93	2692.83	2724.68	-	1.29258	0.0187439	37.8909	5.24378	up
T3_positive	MW0145418	Arg-Leu-Leu-Asn-Asn	Amino acid and Its metabolites	Small Peptide	C26H48N10O8	629.361	628.366	3.4297	[M+H]+	19.637	3	0.8267	rp	-	-	-	264134	-	115.77	294.64	95.06	26662	14733	13797.8	8414	8364.56	8359.17	-	1.29385	0.0478943	109.191	6.77071	up
T3_positive	MW0155188	Phe-Glu-Ser-Phe-Gly	Amino acid and Its metabolites	Small Peptide	C28H35N5O9	586.26	585.244	7.7751	[M+H]+	16.7823	3	0.8267	rp	-	-	-	264063	-	1805.83	1439.94	3200.33	15884.1	18212	20954.2	15193.2	15348.8	14336	-	1.27917	0.00388581	8.54011	3.09425	up
T3_positive	MW0156791	Ser-Ile-Asn-Lys	Amino acid and Its metabolites	Small Peptide	C19H36N6O7	461.273	460.264	6.5569	[M+H]+	1.36222	3	0.8255	rp	-	-	-	226507	-	335513	316929	292508	266186	227269	239863	189078	188088	189076	-	1.17977	0.0142573	0.776039	-0.365799	down
T3_positive	MW0123403	Clozapine N-oxide	Heterocyclic compounds	Heterocyclic compounds	C18H19ClN4O	343.129	342.125	3.3275	[M+H]+	6.68716	3	0.8254	rp	-	135445691	HMDB0060900	-	-	5916.23	3956.15	2002.91	19675.1	19163.7	10511.9	11900	11741.3	11789.8	-	1.16822	0.0388276	4.15575	2.05511	up
T3_positive	MW0109382	Prolyl-Asparagine	Amino acid and Its metabolites	polypeptide	C9H15N3O4	230.113	229.106	1.3126	[M+H]+	0.4	3	0.8246	rp	-	7408193	-	-	-	36554.3	33640.9	31515.1	18607.3	16469.7	18865.4	25541.8	25607.6	25743.8	-	1.28726	0.00232276	0.530354	-0.914973	down
T3_positive	MW0059176	Peltatol A	GP	PE	C42H58O4	627.436	626.433	8.0522	[M+H]+	8.6466	3	0.8229	rp	-	5467341	HMDB0038701	-	C00350	286.66	547.99	612.2	1055.58	740.7	1163.41	1482.19	1641.89	1637.71	ko00563,ko00564,ko01100,ko01110,ko04136,ko04138	1.06246	0.0379988	2.04561	1.03253	up
T3_positive	MW0158533	Tyr-Lys-Arg-Glu	Amino acid and Its metabolites	Small Peptide	C26H42N8O8	595.306	594.313	4.3689	[M+H]+	20.9753	3	0.8225	rp	-	-	-	258962	-	91.06	1353.02	1538	9312.34	6331.61	6159.51	3105.3	3132.87	3092.06	-	1.05558	0.0139966	7.31149	2.87017	up
T3_positive	MW0158615	Tyr-Thr-Ala-Glu	Amino acid and Its metabolites	Small Peptide	C21H30N4O9	483.213	482.201	4.3237	[M+H]+	7.54044	3	0.8222	rp	-	-	-	261882	-	326.78	568.64	878.9	6913.3	5175.44	4451.9	2571.8	2650.39	2609.78	-	1.26585	0.017601	9.32224	3.22068	up
T3_positive	MW0146027	Asp-Arg-Lys-Lys	Amino acid and Its metabolites	Small Peptide	C22H43N9O7	546.343	545.328	8.7132	[M+H]+	9.44226	3	0.8168	rp	-	-	-	125248	-	2176.32	3689.49	6171.19	45038.8	65788.5	46477.3	32203.3	35152.9	35529.8	-	1.27338	0.0162729	13.0684	3.70801	up
T3_positive	MW0123754	Doramapimod	Heterocyclic compounds	Heterocyclic compounds	C31H37N5O3	528.306	527.29	6.9304	[M+H]+	19.061	3	0.8165	rp	-	156422	HMDB0251587	-	-	84884.6	68381.3	101185	231606	217943	225032	190000	192058	191883	-	1.27844	0.00150592	2.65112	1.4066	up
T3_positive	MW0151358	Ile-Asn-Val-Asp-Tyr	Amino acid and Its metabolites	Small Peptide	C28H42N6O10	623.295	622.296	3.0784	[M+H]+	14.0541	3	0.815	rp	-	-	-	264182	-	8900.97	8583.32	9956.09	82499.2	51957.5	57177.1	35068.3	34929	34639.2	-	1.29797	0.0282371	6.98364	2.80398	up
T3_positive	MW0015132	7',8'-Dihydro-8'-hydroxyreticulataxanthin	Aldehyde,Ketones,Esters	Ketones	C33H46O3	473.345	490.345	7.6886	[M+H-H2O]+	10.5909	3	0.8137	rp	-	131752545	HMDB0039090	-	-	90146.9	76556.4	81399.4	61444.2	64167.3	65439.6	58181.3	57724.6	57991.1	-	1.22092	0.0325082	0.770048	-0.376979	down
T3_positive	MW0152219	Leu-Arg-Asp-Lys	Amino acid and Its metabolites	Small Peptide	C22H42N8O7	531.326	530.318	7.4554	[M+H]+	4.268	3	0.8135	rp	-	-	-	181127	-	2935.11	1035.15	4336.18	29986.8	45450.7	44540.8	15233.8	15498.1	15293	-	1.24952	0.0150188	14.444	3.8524	up
T3_positive	MW0124746	Malyngamide T	Alcohol and amines	Amines	C25H38ClNO5	468.25	467.244	4.3237	[M+H]+	0.0206204	3	0.81	rp	-	643677	-	65411	-	166.06	727.97	180.3	8539.5	6559.47	6199.03	3793.09	3725.33	3776.23	-	1.25572	0.00822538	19.8244	4.30921	up
T3_positive	MW0117020	1D-1-O-(indol-3-yl)acetyl-myo-inositol	Heterocyclic compounds	Indole and Its derivatives	C16H19NO7	360.104	337.116	2.4549	[M+Na]+	4.375	3	0.8041	rp	-	440152	HMDB0031182	-	-	3958.1	3542.89	2623.3	249.64	190.53	179.25	951.31	902.51	1024.86	-	1.30329	0.0149216	0.0611816	-4.03076	down
T3_positive	MW0122849	N-(5-Adamant-1-yl methoxy)pentyl deoxynojirimycin	Heterocyclic compounds	Heterocyclic compounds	C22H39NO5	398.296	397.283	7.1262	[M+H]+	19.3004	3	0.8026	rp	-	3662391	HMDB0248353	-	-	28191.3	43587.4	40746.1	10013.3	14915.3	14294.5	16711.2	16820.9	16825.1	-	1.23908	0.0262423	0.348573	-1.52047	down
T3_positive	MW0162477	indole-3-glycol	Alcohol and amines	Alcohols	C10H11NO2	195.11	177.079	2.1299	[M+NH4]+	7.7	3	0.802	rp	-	25202910	HMDB0304392	-	-	9932.37	10255.3	9240.35	5377.83	4396.01	4976.81	6740.79	6737.8	6745.28	-	1.28712	0.000295701	0.501245	-0.996413	down
T3_positive	MW0006570	Ciglitazone	Benzene and substituted derivatives	Phenolics	C18H23NO3S	351.177	333.14	0.7637	[M+NH4]+	6.50869	3	0.8016	rp	-	2750	HMDB0250241	-	-	125689	99376.9	117763	38152	29568.6	38239.4	65225	65823.2	65802.6	-	1.28813	0.00477857	0.309075	-1.69397	down
T3_positive	MW0140287	(2R)-O-phospho-3-sulfolactic acid	Aldehyde,Ketones,Esters	Esters	C3H7O9PS	316.905	249.955	9.2828	[M-2H+3Na]+	8.35	3	0.7995	rp	-	443249	-	-	-	62476.4	63652.8	65247.4	53584.9	54456.3	51314.3	67022.7	65639	69222	-	1.27783	0.00108758	0.83268	-0.264165	down
T3_positive	MW0154010	Mycolactone F	Heterocyclic compounds	Heterocyclic compounds	C42H68O8	665.466	700.491	7.1543	[M+H-2H2O]+	18.4776	3	0.7993	rp	-	24757914	-	-	C21278	22502.4	18904.8	16487	11102.4	10249.7	7968.27	12812.5	12549.9	12527.5	-	1.22112	0.0164055	0.506446	-0.981519	down
T3_positive	MW0158525	Tyr-Leu-Phe-Asp	Amino acid and Its metabolites	Small Peptide	C28H36N4O8	557.256	556.253	1.7106	[M+H]+	2.50754	3	0.7992	rp	-	-	-	259161	-	748.4	769.99	649.14	4158.48	4214.81	3687.58	1308.01	1301.29	1268.22	-	1.30776	0.00171135	5.56434	2.47621	up
T3_positive	MW0109380	2-[(Pyrrolidinium-2-ylcarbonyl)amino]propanoate	Amino acid and Its metabolites	Small Peptide	C8H14N2O3	169.096	186.1	2.235	[M+H-H2O]+	1.56258	3	0.7988	rp	-	44369241	HMDB0029010	-	-	43086.4	46228.2	38680.6	54597.9	49114.3	50970.9	39841	39823.5	40258.3	-	1.11124	0.0347526	1.20851	0.273226	up
T3_positive	MW0006162	N-[2-(Dimethylamino)ethyl]-N-methyl-4-[({4-[4-morpholin-4-yl-7-(2,2,2-trifluoroethyl)-7H-pyrrolo[2,3-d]pyrimidin-2-yl]phenyl}carbamoyl)amino]benzamide	Benzene and substituted derivatives	Benzene and substituted derivatives	C31H35F3N8O3	625.285	624.278	3.0784	[M+H]+	11.9919	3	0.7977	rp	-	44599690	-	64842	-	138.33	193.7	76.7	9718.13	6652.81	6058.59	3493.04	3500.48	3465.8	-	1.29756	0.0229575	54.8762	5.77811	up
T3_positive	MW0141612	17-Methyl-3-(2,4-cyclopentadien-1-ylidene)-5alpha-androstane-17beta-ol	Hormones and hormone related compounds	Hormones and hormone related compounds	C25H36O	335.269	352.277	7.0863	[M+H-H2O]+	12.3578	3	0.7975	rp	-	247748	-	-	-	61716.9	68247.1	55077.8	32358.3	35309.5	33710.7	41113.1	41249.6	40882.9	-	1.28133	0.0145603	0.547868	-0.868099	down
T3_positive	MW0012818	Arachidonoyl PAF C-16	GP	PC	C44H82NO7P	790.589	767.583	7.8966	[M+Na]+	13.012	3	0.7967	rp	-	14389476	-	43414	C00157	31720.4	28544.5	30315.1	20158.8	21555.1	22098.7	23242.4	23227.7	23360.5	ko00564,ko00590,ko00592,ko01100,ko01110	1.27793	0.00242274	0.704489	-0.50535	down
T3_positive	MW0011920	PE-NMe(16:0/16:0)	GP	PE	C38H76NO8P	728.537	705.531	7.815	[M+Na]+	21.3177	3	0.7951	rp	-	9547031	HMDB0010567	-	C00350	82.37	198.2	144.79	4891.72	6166.4	5044.25	8942.05	8754.13	8955.66	ko00563,ko00564,ko01100,ko01110,ko04136,ko04138	1.29817	0.00559784	37.8559	5.24244	up
T3_positive	MW0008096	N-(2-phenylphenyl)-8-[4-(3-pyridinyl)-1-triazolyl]octanamide	Benzene and substituted derivatives	Benzene and substituted derivatives	C27H29N5O	462.224	439.237	2.9549	[M+Na]+	6.32879	3	0.7935	rp	-	44819697	-	96512	-	3232	5528.95	5968.08	39008.2	25147.4	23061	15186.3	15106.8	15118.5	-	1.26342	0.0370901	5.92141	2.56594	up
T3_positive	MW0113100	4-Methoxybenzyl O-(2-sulfoglucoside)	Benzene and substituted derivatives	Benzene and substituted derivatives	C14H20O10S	381.085	380.078	2.6921	[M+H]+	0.256202	3	0.7934	rp	-	74083239	HMDB0034754	-	-	5579.49	5883.85	5748.07	14848.7	18086	16413.5	9085.24	9122.66	9098.82	-	1.3029	0.00712677	2.86718	1.51963	up
T3_positive	MW0109436	Pro-Thr	Amino acid and Its metabolites	Small Peptide	C9H16N2O4	199.107	216.111	2.0947	[M+H-H2O]+	1.02305	3	0.7931	rp	-	18218237	HMDB0029027	23985	-	14627.2	14165.8	12355.3	17574.2	16236.4	16058.7	13900.7	13817.4	13898.7	-	1.12201	0.0314168	1.21194	0.277319	up
T3_positive	MW0155309	Phe-Phe-Val	Amino acid and Its metabolites	Small Peptide	C23H29N3O4	434.211	411.216	2.5998	[M+Na]+	10.0779	3	0.7922	rp	-	102144079	-	19599	-	11128.1	15899.4	12419.9	37029.3	31514	28475.2	21804.8	21757.5	21855.4	-	1.26123	0.00577576	2.45944	1.29833	up
T3_positive	MW0151607	Ile-Thr-Tyr-Asp	Amino acid and Its metabolites	Small Peptide	C23H34N4O9	511.262	510.233	2.5823	[M+H]+	18.0366	3	0.7922	rp	-	-	-	166261	-	3073.67	5613.99	5329.98	33096.2	24344	23992	14886	14959.8	15101.5	-	1.27469	0.0124973	5.80927	2.53836	up
T3_positive	MW0151553	Ile-Phe-Val-Lys	Amino acid and Its metabolites	Small Peptide	C26H43N5O5	506.324	505.326	6.9192	[M+H]+	18.0829	3	0.792	rp	-	-	-	161427	-	118420	86617.6	132502	483611	391045	459011	309314	310501	308206	-	1.28619	0.00196235	3.95114	1.98227	up
T3_positive	MW0144585	Ala-His-Ala	Amino acid and Its metabolites	Small Peptide	C12H19N5O4	315.18	297.144	2.2267	[M+NH4]+	5.36234	3	0.7917	rp	-	7019972	-	19421	-	1410.2	1285.96	1234.43	6147.28	6650.02	5122.12	3326.4	3329.02	3274	-	1.30285	0.00848384	4.55896	2.18871	up
T3_positive	MW0168293	Isoleucylthreonine	Amino acid and Its metabolites	Small Peptide	C10H20N2O4	233.15	232.142	2.2174	[M+H]+	0.025	3	0.7905	rp	-	18218220	HMDB0028917	-	-	4606.2	4597.2	3881.41	2250.83	1730.62	2419.79	2433.1	2317.51	2348.6	-	1.24602	0.00234206	0.489212	-1.03147	down
T3_positive	MEDP1212	1,3-Dicyclohexylurea	Alcohol and amines	Polyamines	C13H24N2O	225.195	224.189	6.1718	[M+H]+	0.993107	3	0.7904	rp	-	4277	HMDB0244166	-	-	9707.81	8963.18	9606.29	7457.16	8342.41	7821.88	7378.85	7444.46	7326.02	-	1.19737	0.0112784	0.835351	-0.259546	down
T3_positive	MW0107650	Allysine	Amino acid and Its metabolites	Amino acids	C6H11NO3	291.156	145.074	0.6217	[2M+H]+	1.8	3	0.7896	rp	-	160603	HMDB0001263	-	C04076	6080.18	10263.9	7577.3	2588.43	2684.71	2887.69	4972.01	5270.33	5034.2	ko00300,ko00310,ko01100,ko01110,ko01230	1.25857	0.0495465	0.341153	-1.55151	down
T3_positive	MW0153872	Met-Phe	Amino acid and Its metabolites	Small Peptide	C14H20N2O3S	297.127	296.12	2.9307	[M+H]+	0.25508	3	0.7894	rp	-	100048	HMDB0028980	-	-	358.8	196.28	253.79	5093.88	4989.96	4589.51	2095.29	1999.56	1973.36	-	1.30249	0.000443031	18.1406	4.18115	up
T3_positive	MW0145390	Arg-Ile-Glu-Asp	Amino acid and Its metabolites	Small Peptide	C21H37N7O9	532.278	531.265	7.7751	[M+H]+	10.6563	3	0.7883	rp	-	-	-	218341	-	57380.8	63784.2	47112.7	35313.1	35567.5	34200.7	26773.1	26423.1	26679	-	1.22411	0.0482823	0.624452	-0.679337	down
T3_positive	MW0161620	(3S,10R,13R)-10,13-dimethyl-17-[(2R)-6-methylheptan-2-yl]-2,3,4,7,8,9,11,12,14,15,16,17-dodecahydro-1H-cyclopenta[a]phenanthren-3-ol	Alcohol and amines	Alcohols	C27H46O	409.342	386.355	8.6244	[M+Na]+	5.54546	3	0.7863	rp	-	15939944	-	-	-	6176.95	5686.87	7932.88	4465.83	4246.03	2510.97	3507.79	3463.19	3501.28	-	1.07078	0.0365051	0.566904	-0.818823	down
T3_positive	MW0062181	Celestrol methyl ester	Terpenoids	Triterpene	C30H40O4	465.298	464.293	7.9484	[M+H]+	3.74407	3	0.7849	rp	-	10004662	-	-	-	19237	16257.1	14834.7	7478.32	10637	11744.9	15277.7	15227.5	15072.1	-	1.13352	0.0200126	0.593303	-0.753158	down
T3_positive	MW0158421	Tyr-Cys-Asp	Amino acid and Its metabolites	Small Peptide	C16H21N3O7S1	400.115	399.11	2.1085	[M+H]+	1.63513	3	0.7827	rp	-	145458599	-	21048	-	1445.77	1193.45	582.13	2825.25	3348.38	2792.77	1745.86	1696.94	1690.56	-	1.16338	0.00513796	2.78343	1.47686	up
T3_positive	MW0118056	Benzoic acid, 2-[3,6-bis(acetyloxy)-2,7-dichloro-9H-xanthen-9-yl]-	Aldehyde,Ketones,Esters	Esters	C24H16Cl2O7	469.016	486.027	0.5512	[M+H-H2O]+	12.1405	3	0.7819	rp	-	77718	HMDB0246648	-	-	921.11	335.22	484.97	7969.34	6517.38	9702.12	2932.76	3237.33	2447.65	-	1.27825	0.0124518	13.8913	3.7961	up
T3_positive	MW0142895	3-DEOXO-3-ACETOXYDEOXYDIHYDROGEDUNIN	Others	Others	C30H40O7	513.282	512.277	7.1543	[M+H]+	4.73548	3	0.7812	rp	-	-	-	43683	-	23826.2	24553.5	23314	3565.73	13606.7	8351.96	15384	15339	15416.2	-	1.09566	0.0320574	0.35602	-1.48997	down
T3_positive	MW0156835	Ser-Leu-Val-Ser-Asp	Amino acid and Its metabolites	Small Peptide	C21H37N5O10	520.26	519.254	2.3581	[M+H]+	2.01367	3	0.7795	rp	-	-	-	264214	-	7119.33	8162.77	5359.76	29731.2	29714.4	27487.3	16880.5	16796.6	16805.3	-	1.2924	3.96191e-05	4.21149	2.07433	up
T3_positive	MW0147378	Chivosazole F	Others	Medicine	C41H57NO8	656.383	691.408	7.8129	[M+H-2H2O]+	16.8489	3	0.7792	rp	-	10818425	-	-	-	10025.1	8729.23	8510.1	5222.21	6778.78	5940.74	6694.45	6560.19	6523.98	-	1.20784	0.00894356	0.658064	-0.6037	down
T3_positive	MW0144710	Ala-Pro-Asp-Ala-Lys	Amino acid and Its metabolites	Small Peptide	C21H36N6O8	501.278	500.26	6.7604	[M+H]+	19.3141	3	0.7784	rp	-	-	-	264265	-	287726	258068	358159	633567	652889	618262	374986	337614	364693	-	1.26993	0.00412344	2.1071	1.07526	up
T3_positive	MW0122740	Acridone	Aldehyde,Ketones,Esters	Ketones	C13H9NO	196.075	195.068	5.5124	[M+H]+	0.67318	3	0.7784	rp	-	2015	HMDB0246984	-	C20142	623.57	344.35	286.46	1151.85	2096.58	1950.79	939.87	995.45	951.11	-	1.20955	0.0347164	4.14485	2.05132	up
T3_positive	MW0151045	His-Phe-His	Amino acid and Its metabolites	Small Peptide	C21H25N7O4	440.202	439.197	6.5701	[M+H]+	2.52872	3	0.7755	rp	-	145455934	-	19937	-	33788.9	36170.6	27375.8	18758.8	23856.5	25472.5	16796.1	17025.6	16956.7	-	1.07786	0.0457918	0.699518	-0.515567	down
T3_positive	MW0129640	1,26-Hexacosanediol diferulate	Alcohol and amines	Alcohols	C46H70O8	751.519	750.507	7.9139	[M+H]+	0.084287	3	0.7752	rp	-	129681811	HMDB0030751	-	-	16463.4	14420.6	15483	9536.91	9801.67	9290.01	12250.6	12294.2	11861.7	-	1.29368	0.00697876	0.617435	-0.695641	down
T3_positive	MW0115770	(1-(5-Fluoropentyl)-1H-indol-3-yl)(2,2,3,3-tetramethylcyclopropyl)methanone	Aldehyde,Ketones,Esters	Ketones	C21H28FNO	330.212	329.216	2.4284	[M+H]+	22.6034	3	0.7744	rp	-	57501498	-	85221	-	2269.26	1862.54	756.39	7125.29	5729.74	7439.73	2710.67	2123.4	2488.56	-	1.19376	0.00193021	4.15179	2.05374	up
T3_positive	MW0154728	Oleic Acid-biotin	FA	Others	C28H50N4O3S	523.359	522.36	7.2238	[M+H]+	17.915	3	0.7741	rp	-	-	-	45287	-	321017	192296	276667	2.30539e+06	1.57463e+06	1.96176e+06	1.13464e+06	1.14428e+06	1.10527e+06	-	1.29077	0.0132128	7.39484	2.88652	up
T3_positive	MW0158152	Trp-Gly-Asp	Amino acid and Its metabolites	Small Peptide	C17H20N4O6	377.142	376.138	3.9563	[M+H]+	5.30122	3	0.7725	rp	-	145458367	-	18481	-	2568.57	3134.16	3062.85	4498.89	4903.29	4660.78	3223.12	3219.12	3148.82	-	1.26114	0.00210499	1.60434	0.681979	up
T3_positive	MW0159163	Val-Ser-Ser-Ser-Leu	Amino acid and Its metabolites	Small Peptide	C20H37N5O9	492.263	491.259	2.1416	[M+H]+	6.28452	3	0.7721	rp	-	-	-	264806	-	758.62	874.42	2028.64	37162.6	21868.9	20816.8	11981.3	11996.5	12079.6	-	1.27991	0.0399353	21.8065	4.44668	up
T3_positive	MW0105809	Asparagylcysteine	Amino acid and Its metabolites	Small Peptide	C7H13N3O4S	236.079	235.063	0.6947	[M+H]+	21.995	3	0.7715	rp	-	18218178	HMDB0028728	-	-	77629.4	89098.1	69787.3	277824	261347	257603	183527	184184	184629	-	1.30255	2.59433e-05	3.36882	1.75224	up
T3_positive	MW0145467	Arg-Phe-Phe	Amino acid and Its metabolites	Small Peptide	C24H32N6O4	469.255	468.248	2.7981	[M+H]+	3.73659	3	0.7665	rp	-	11374777	-	18665	-	72.23	26.4	25.91	7500.63	3944.9	5813.94	1970.4	1523.23	1863.62	-	1.29749	0.0308132	138.586	7.11464	up
T3_positive	MW0006838	Dihydroconiferyl alcohol	Benzene and substituted derivatives	Phenolics	C10H14O3	165.088	182.094	3.5176	[M+H-H2O]+	7.43685	3	0.7647	rp	-	16822	HMDB0303757	-	C10448	2930.12	2625.63	2648.39	2293.35	2120.57	2135.35	3749.26	3134.33	3604.21	-	1.22325	0.014373	0.798288	-0.325018	down
T3_positive	MW0155306	Phe-Phe-Thr	Amino acid and Its metabolites	Small Peptide	C22H27N3O5	413.195	413.195	2.9989	[M+]+	0.118584	3	0.7632	rp	-	145457294	-	21351	-	436.88	3470.58	814.14	9872.72	5908.94	5635.38	4057.53	4060.1	4015.24	-	1.08212	0.0343664	4.53597	2.18141	up
T3_positive	MW0149651	Gln-Asp-Met	Amino acid and Its metabolites	Small Peptide	C14H24N4O7S1	375.135	392.137	5.2003	[M+H-H2O]+	8.92202	3	0.7617	rp	-	145455010	-	20613	-	290.36	11.62	273.29	2919.37	2448.32	1987.11	817.74	700.68	759.25	-	1.09271	0.00834237	12.785	3.67637	up
T3_positive	MW0144604	Ala-His-Tyr-Glu	Amino acid and Its metabolites	Small Peptide	C23H30N6O8	536.246	518.212	2.2526	[M+NH4]+	0.742598	3	0.7615	rp	-	-	-	106263	-	439.6	624.76	611.37	20795.2	11636.8	12123.1	5736.71	5678.92	5681.11	-	1.30111	0.0406489	26.5885	4.73273	up
T3_positive	MW0155378	Phe-Tyr-Asn-Glu	Amino acid and Its metabolites	Small Peptide	C27H33N5O9	589.258	571.228	1.8457	[M+NH4]+	3.1575	3	0.7609	rp	-	-	-	143302	-	72.69	456.07	28.34	12919.6	8831.94	8059.84	4007.27	4011.02	4020.24	-	1.23456	0.0223454	53.5117	5.74178	up
T3_positive	MW0158526	Tyr-Leu-Pro-Ala-Val	Amino acid and Its metabolites	Small Peptide	C28H43N5O7	561.317	561.316	7.9694	[M+]+	0.227816	3	0.7601	rp	-	-	-	264946	-	317.32	620.82	802.71	10603.3	7609.01	11247.5	10788	8544.65	11653.9	-	1.28504	0.0133246	16.9226	4.08088	up
T3_positive	MW0150948	His-Gly-Tyr-Val-Glu	Amino acid and Its metabolites	Small Peptide	C27H37N7O9	604.271	603.265	7.2744	[M+H]+	3.66593	3	0.7596	rp	-	-	-	264110	-	23421.6	19623.3	17347.9	62466.8	39167.8	54503.7	50951.8	51084.5	50819.9	-	1.24169	0.035946	2.58538	1.37037	up
T3_positive	MW0110219	Tyr-Ser-Arg	Amino acid and Its metabolites	Small Peptide	C18H28N6O6	425.216	424.207	2.0947	[M+H]+	2.17687	3	0.7594	rp	-	145458751	-	21898	-	558.96	69.28	161.24	53156	38986.7	34851	16941.4	16838	16842.3	-	1.27929	0.0168616	160.857	7.32964	up
T3_positive	MW0105615	2-Aminoadipic acid	Organic acid and Its derivatives	Organic acid and Its derivatives	C6H11NO4	144.065	161.069	1.7454	[M+H-H2O]+	1.03555	3	0.7584	rp	-	469	HMDB0302754	5496	C00956	5749.66	6016.98	5480.3	9279.12	8946.01	9105.87	5734.23	6143.64	6180.27	ko00300,ko00310,ko01100,ko01110,ko01210,ko01230	1.30224	0.00017693	1.58469	0.664198	up
T3_positive	MW0145350	Arg-Glu-Lys-Asp-Lys	Amino acid and Its metabolites	Small Peptide	C27H50N10O10	692.41	674.371	7.3121	[M+NH4]+	5.06698	3	0.7575	rp	-	-	-	264714	-	4859.55	6227.22	6264.77	2490.84	3867.29	2056.85	2445.13	2207.34	2410.17	-	1.15662	0.0148895	0.48497	-1.04403	down
T3_positive	MW0152917	Lys-Asp-Val	Amino acid and Its metabolites	Small Peptide	C15H28N4O6	361.21	360.201	0.7791	[M+H]+	3.30375	3	0.7564	rp	-	91974732	-	21394	-	31799.5	31581.8	26543.6	73788.6	56031	70099	43016.4	41823	40392.3	-	1.27211	0.0143723	2.22317	1.15262	up
T3_positive	MW0169172	Flubendazole	Benzene and substituted derivatives	Benzene and substituted derivatives	C16H12FN3O3	314.092	313.086	2.0561	[M+H]+	4.908	3	0.7549	rp	-	35802	HMDB0252324	-	-	6723.89	7970.21	6269.41	27661.9	27233.7	22666	17754.7	17617.2	17657.2	-	1.29791	0.00392368	3.69984	1.88746	up
T3_positive	MW0158361	Tyr-Ala-Phe-Arg	Amino acid and Its metabolites	Small Peptide	C27H37N7O6	556.309	555.28	6.0161	[M+H]+	18.1137	3	0.7547	rp	-	-	-	255573	-	1047.46	1437.18	713.41	5825.53	3698.9	3772.55	1362.03	1412.74	1425.27	-	1.24033	0.0316407	4.15784	2.05583	up
T3_positive	MW0056918	1,2-Dipalmitoleoyl-sn-glycero-3-phosphocholine	GP	PC	C40H76NO8P	752.515	729.531	7.1209	[M+Na]+	2.49729	3	0.7547	rp	-	24778764	HMDB0008002	-	C00157	25535.8	22724.9	21696.5	13527	10427	11534	15138.5	15201.8	15005.4	ko00564,ko00590,ko00592,ko01100,ko01110	1.26687	0.00175391	0.507282	-0.97914	down
T3_positive	MW0114487	2-Furancarboxaldehyde	Aldehyde,Ketones,Esters	Aldehydes	C5H4O2	97.0277	96.0211	0.8146	[M+H]+	1.75595	3	0.7542	rp	-	7362	HMDB0032914	-	C14279	10795.7	11494.8	12601.8	18702	15201.3	16934	13296.5	13154.7	13453.6	ko01100	1.22135	0.0184644	1.45698	0.54298	up
T3_positive	MW0161515	1-Aci-nitro-2-phenylethane	Others	Others	C8H9NO2	174.058	151.063	3.5264	[M+Na]+	12.675	3	0.754	rp	-	13718040	-	-	-	95.91	46.12	58.62	2591.54	1893.9	1761.64	806.24	808.91	801.96	-	1.29941	0.0156739	31.1342	4.96043	up
T3_positive	MW0144634	Ala-Leu-Gly	Amino acid and Its metabolites	Small Peptide	C11H21N3O4	260.16	259.153	2.1561	[M+H]+	3.98138	3	0.7537	rp	-	6992450	-	21498	-	2484.79	2609.3	2137.78	417.71	220.06	407.41	1301	1275.96	1273.88	-	1.27904	0.00130423	0.144524	-2.79062	down
T3_positive	MW0150030	Glu-Ile-Ala	Amino acid and Its metabolites	Small Peptide	C14H25N3O6	332.182	331.174	3.2794	[M+H]+	0.167677	3	0.7527	rp	-	145455402	-	18382	-	305.08	1291.91	1098.3	10884.5	8540.65	8600.85	4705.81	4655.55	4653.15	-	1.23107	0.00364408	10.3982	3.37825	up
T3_positive	MW0146152	Asp-Ile-Lys-Glu-Met	Amino acid and Its metabolites	Small Peptide	C26H46N6O10S	634.301	634.3	2.5514	[M+]+	2.5308	3	0.7525	rp	-	-	-	264585	-	2480.51	5334.98	3313.18	30657.6	24010.7	23982.4	12142.1	12195.5	12144	-	1.27693	0.00457523	7.0674	2.82118	up
T3_positive	MW0154009	Mycolactone E	Heterocyclic compounds	Heterocyclic compounds	C43H70O8	679.48	714.507	7.4122	[M+H-2H2O]+	22.8926	3	0.7514	rp	-	25172513	-	-	C21277	9024.52	7627.76	12928.9	4577.94	2338.27	5761.78	5010.12	5108.12	5086.24	-	1.0693	0.0494688	0.428584	-1.22235	down
T3_positive	MW0140583	(R)-2-O-sulfolactic acid	Organic acid and Its derivatives	Organic acid and Its derivatives	C3H6O6S	236.943	169.988	8.8631	[M-2H+3Na]+	3.725	3	0.7509	rp	-	439843	-	-	C17205	37588.5	40612.9	46921.9	30074.1	26669.2	25403.4	35362.6	33624.7	35651.9	-	1.22087	0.0192786	0.656527	-0.607075	down
T3_positive	MW0153546	Met-Glu-Leu-Tyr-Arg	Amino acid and Its metabolites	Small Peptide	C31H50N8O9S	710.336	710.342	3.2094	[M+]+	4.96018	3	0.7507	rp	-	-	-	264541	-	403.9	148.13	167.18	11887.8	6421.65	9395.71	3483.25	3483.98	3496.63	-	1.28873	0.0292092	38.5217	5.2676	up
T3_positive	MW0150115	Glu-Phe-Tyr-Leu-Gly	Amino acid and Its metabolites	Small Peptide	C31H41N5O9	627.276	627.29	2.4638	[M+]+	6.14138	3	0.7506	rp	-	-	-	264841	-	10936.9	15322.8	12697.1	33735.2	25160	27104.8	23220	22845.5	22989.5	-	1.24717	0.0132939	2.20758	1.14246	up
T3_positive	MW0141636	17-phenyl trinor Prostaglandin E2 serinol amide	Hormones and hormone related compounds	Hormones and hormone related compounds	C26H37NO6	442.259	459.262	7.0366	[M+H-H2O]+	5.2492	3	0.7504	rp	-	-	-	44884	-	5720.27	5631.3	4999.43	2966.13	3181.3	1759.46	2998.98	3056.48	3034.27	-	1.17302	0.0110776	0.483572	-1.0482	down
T3_positive	MW0155997	Pro-Ser-Val	Amino acid and Its metabolites	Small Peptide	C13H23N3O5	266.152	301.164	5.9814	[M+H-2H2O]+	4.11749	3	0.7496	rp	-	145457581	-	23420	-	7303.42	8420.18	8185.7	6304.75	6376.15	7090.56	9760.81	9771.24	9683.32	-	1.12134	0.0349598	0.826936	-0.274152	down
T3_positive	MW0155860	Pro-Glu-Thr	Amino acid and Its metabolites	Small Peptide	C14H23N3O7	363.188	345.154	3.7633	[M+NH4]+	0.0982267	3	0.749	rp	-	7048511	-	18278	-	3421.63	3024.12	3274.56	2743.51	2983.89	2570.31	2641.35	2619.7	2617.95	-	1.07405	0.0468406	0.853647	-0.228289	down
T3_positive	MW0150432	Gly-Lys-Val-Lys-Lys	Amino acid and Its metabolites	Small Peptide	C25H50N8O6	576.411	558.385	7.1715	[M+NH4]+	13.5035	3	0.7485	rp	-	-	-	264276	-	56395.8	51762.1	47400.9	36383.1	32383.9	29517.1	39800.3	39826.3	39586.5	-	1.24132	0.00525558	0.631813	-0.662431	down
T3_positive	MW0151222	HoPhe-Ser-OH	Amino acid and Its metabolites	Small Peptide	C18H18N2O7	392.149	374.111	2.5291	[M+NH4]+	5.35626	3	0.7478	rp	-	-	-	65154	-	23511.2	28753.9	21992.5	66439.9	68344.4	59879.7	29656.1	29713	29672.1	-	1.28947	0.000336464	2.62147	1.39038	up
T3_positive	MW0150223	Glu-Val-Tyr-Asp	Amino acid and Its metabolites	Small Peptide	C23H32N4O10	525.231	524.212	1.9834	[M+H]+	22.6391	3	0.7476	rp	-	-	-	134662	-	1382.76	2034.09	654.59	6219.78	4420.82	4517.38	2774.48	2786.05	2757.58	-	1.17458	0.00897401	3.723	1.89647	up
T3_positive	MW0155253	Phe-Leu-Leu-Val-Phe	Amino acid and Its metabolites	Small Peptide	C35H51N5O6	638.377	637.384	3.8509	[M+H]+	18.9384	3	0.7475	rp	-	-	-	264519	-	3515.13	3469.25	3196.94	2646.02	2372.12	2414.86	2818.44	2818.38	2879.48	-	1.26012	0.00238225	0.730063	-0.453908	down
T3_positive	MW0155424	Phe4Cl-His-OH	Amino acid and Its metabolites	Small Peptide	C20H17ClN4O6	445.078	444.084	3.2368	[M+H]+	21.9741	3	0.7474	rp	-	-	-	65216	-	1175.47	1012.01	924.23	3594.07	4125.54	4289.62	2201.01	2188.39	2188.13	-	1.30072	0.0022484	3.85937	1.94836	up
T3_positive	MW0146084	Asp-Gln-Leu-Thr-Glu	Amino acid and Its metabolites	Small Peptide	C24H40N6O12	605.273	604.27	7.7751	[M+H]+	5.71014	3	0.7445	rp	-	-	-	264769	-	3009.84	3298.54	4878.77	20125.3	26472	31732.6	19411.6	19016.9	19178.3	-	1.28547	0.019272	7.00177	2.80772	up
T3_positive	MW0153830	Methylcarbamyl PAF C-8	Aldehyde,Ketones,Esters	Esters	C18H39N2O7P	427.255	426.25	4.3201	[M+H]+	0.242029	3	0.7445	rp	-	-	-	62994	-	855.42	641.48	677.96	8667.66	5017.5	5975.4	3023.61	3055.94	3029.62	-	1.29507	0.032987	9.03992	3.17631	up
T3_positive	MW0152846	Lys-Ala-Glu	Amino acid and Its metabolites	Small Peptide	C14H26N4O6	329.182	346.185	2.1123	[M+H-H2O]+	1.73398	3	0.7443	rp	-	145456568	-	19875	-	3710.52	4366.76	3366.53	2829.35	1976.85	1964.67	2179.93	2122.61	2256.51	-	1.15542	0.0191209	0.591662	-0.757154	down
T3_positive	MW0153282	Lys-TyrMe-OH	Amino acid and Its metabolites	Small Peptide	C21H25N3O7	432.171	431.169	0.7944	[M+H]+	9.39115	3	0.7437	rp	-	-	-	65089	-	557706	552937	463245	745751	646404	745425	580212	578852	574258	-	1.17602	0.0142663	1.35815	0.441646	up
T3_positive	MW0144596	Ala-His-Met	Amino acid and Its metabolites	Small Peptide	C14H23N5O4S1	358.151	357.147	8.1558	[M+H]+	5.83942	3	0.7437	rp	-	145453594	-	20996	-	4833.15	4094.43	5453.36	1952.56	1261.29	2355.77	1682.92	1480.85	1641.14	-	1.20797	0.00497521	0.387292	-1.36851	down
T3_positive	MW0122340	7-[3-(Dimethylamino)propoxy]-6-Methoxy-2-(4-Methyl-1,4-Diazepan-1-Yl)-N-(1-Methylpiperidin-4-Yl)quinazolin-4-Amine	Heterocyclic compounds	Heterocyclic compounds	C26H43N7O2	508.339	485.348	6.9534	[M+Na]+	4.31613	3	0.7412	rp	-	44251522	-	64826	-	107440	53600	124165	360978	312111	376723	201852	202355	201601	-	1.22321	0.000938517	3.68091	1.88006	up
T3_positive	MW0144679	Ala-Met-Leu-Asn-Asp	Amino acid and Its metabolites	Small Peptide	C22H38N6O9S	563.247	562.242	2.6743	[M+H]+	3.88974	3	0.7399	rp	-	-	-	264695	-	2755.65	3814.52	3691.61	42965.4	31243.5	33035	17764.7	17653.3	17762	-	1.3031	0.0119475	10.4508	3.38554	up
T3_positive	MW0155763	Pro-Ala-Glu	Amino acid and Its metabolites	Small Peptide	C13H21N3O6	298.137	315.143	1.4385	[M+H-H2O]+	7.55699	3	0.7397	rp	-	102410341	-	23591	-	9773.82	7428.18	8492.87	1350.4	1377.75	1532.61	3877.66	3873.74	3810.69	-	1.30562	0.00853105	0.165821	-2.5923	down
T3_positive	MW0159230	Val-Tyr-Tyr	Amino acid and Its metabolites	Small Peptide	C23H29N3O6	444.211	443.206	2.2174	[M+H]+	4.86988	3	0.7393	rp	-	145459081	-	17551	-	407.38	878.33	399.3	3594	5598.44	4904.88	2756.5	2872.93	2860.82	-	1.26673	0.0145859	8.36631	3.06459	up
T3_positive	MW0153723	Met-Val-Trp	Amino acid and Its metabolites	Small Peptide	C21H30N4O4S1	435.192	434.199	2.086	[M+H]+	7.74781	3	0.739	rp	-	54168618	-	19457	-	552.55	834.31	417.98	1842.15	2313.68	2551.07	1191.19	1201.25	1183.04	-	1.24499	0.00517383	3.71606	1.89378	up
T3_positive	MW0155301	Phe-Phe-Glu-Ser-Phe	Amino acid and Its metabolites	Small Peptide	C35H41N5O9	675.297	675.29	3.6404	[M+]+	10.1874	3	0.7387	rp	-	-	-	264059	-	3274.76	3372.26	2151.53	5050.67	4972.2	4941.97	3407.6	3372.92	3393.74	-	1.16055	0.0336844	1.70083	0.766239	up
T3_positive	MW0154272	Nap-Gly-OH	Amino acid and Its metabolites	Small Peptide	C20H16N2O6	345.085	380.101	2.7449	[M+H-2H2O]+	2.95973	3	0.7369	rp	-	-	-	65077	-	8294.51	8504.31	10506.6	24902.8	21604.8	21924	15035.4	14956.5	14918.4	-	1.28976	0.000816241	2.50616	1.32548	up
T3_positive	MW0122896	Apixaban	Heterocyclic compounds	Heterocyclic compounds	C25H25N5O4	460.197	459.191	0.813	[M+H]+	9.44666	3	0.7346	rp	-	10182969	HMDB0248515	-	-	139763	150273	127268	53094.5	26225	24168.8	50521.6	51730	43318.1	-	1.2372	0.00125849	0.247993	-2.01163	down
T3_positive	MW0161581	4alpha,14alpha-Dimethyl-5alpha-cholesta-8,24-dien-3beta-ol	Alcohol and amines	Alcohols	C29H48O	435.351	412.37	7.4812	[M+Na]+	19.57	3	0.734	rp	-	15101557	-	-	-	4933.41	7137.08	5028.38	3219.25	2661.29	2277.68	2309.74	2308.7	2284.04	-	1.20715	0.0400822	0.47712	-1.06757	down
T3_positive	MW0126559	SIN-1 hydrochloride	Heterocyclic compounds	Heterocyclic compounds	C6H11ClN4O2	193.069	206.057	1.5194	[M+Na]+	3.81451	3	0.7328	rp	-	197942	-	1336	-	68330	76887.9	67291.6	109615	132429	114830	83653.3	83388.2	83813.6	-	1.26334	0.0100977	1.67933	0.74789	up
T3_positive	MW0139814	Taspine	Heterocyclic compounds	Heterocyclic compounds	C20H19NO6	370.127	369.121	6.5913	[M+H]+	9.11928	3	0.7321	rp	-	215159	HMDB0258734	-	-	39607.7	39034.1	36456.8	30018.2	32584.6	30319.4	26980.3	26443.5	26395.9	-	1.24478	0.00467868	0.807327	-0.308775	down
T3_positive	MW0149978	Glu-Gln-Lys-Asp-Arg	Amino acid and Its metabolites	Small Peptide	C26H46N10O11	674.332	674.335	2.3272	[M+]+	2.55684	3	0.7311	rp	-	-	-	264708	-	401.75	930.7	666.56	19632.7	12425.7	13224.8	6414.78	6357.5	6338.86	-	1.29207	0.0236693	22.6529	4.50162	up
T3_positive	MW0013478	2-Hexaprenyl-6-methoxy-1,4-benzoquinone	Benzene and substituted derivatives	Benzene and substituted derivatives	C37H54O3	546.405	546.407	8.4271	[M+]+	5.41166	3	0.73	rp	-	5280826	HMDB0006818	-	C05803	9441.38	9310.88	9168.78	7667.41	6637.74	6119.78	10833.1	11734.6	11504.8	-	1.209	0.0285646	0.731525	-0.451022	down
T3_positive	MW0150153	Glu-Ser-Val-Pro-Glu	Amino acid and Its metabolites	Small Peptide	C23H37N5O11	560.251	559.249	2.5514	[M+H]+	2.46119	3	0.729	rp	-	-	-	264725	-	587.21	428.29	580.31	4281.44	5460.71	5294.6	2734.72	2704.58	2733.49	-	1.30315	0.00590676	9.42264	3.23613	up
T3_positive	MW0147976	Cys-Ala-Pro-Pro-Thr	Amino acid and Its metabolites	Small Peptide	C20H33N5O7S	488.215	487.21	3.0383	[M+H]+	9.76647	3	0.729	rp	-	-	-	264598	-	1306.94	1299.14	958.26	3604.01	3015.52	3465.71	2147.16	2107.31	2039.52	-	1.28208	0.0010831	2.82948	1.50054	up
T3_positive	MW0109101	Phe-Cys-Lys	Amino acid and Its metabolites	Small Peptide	C18H28N4O4S1	361.168	396.183	2.5233	[M+H-2H2O]+	0.218767	3	0.7281	rp	-	145457178	-	23470	-	1831.7	3337.33	842.51	59888.1	40525.1	38830.9	19780	19898.7	20513	-	1.27092	0.0213371	23.1628	4.53374	up
T3_positive	MW0108644	N-Acetyl-L-phenylalanyl-3,5-diiodo-L-tyrosine	Amino acid and Its metabolites	Amino acid derivatives	C20H20I2N2O5	644.933	621.946	0.691	[M+Na]+	6.00472	3	0.7279	rp	-	440331	-	-	C04418	717735	682437	660742	377544	404858	387173	515751	514921	514909	-	1.30472	0.000651457	0.567503	-0.8173	down
T3_positive	MW0149758	Gln-Lys-Leu-Glu	Amino acid and Its metabolites	Small Peptide	C22H40N6O8	517.305	516.291	6.1375	[M+H]+	11.5046	3	0.7272	rp	-	-	-	210862	-	24511.3	24529.5	24716.1	21041.5	18409.3	21094	18389.2	18031.4	18178.6	-	1.19155	0.0375549	0.820869	-0.284775	down
T3_positive	MW0010631	Ncgc00384847-01_C26H34O12_	Lignans and Coumarins	Lignans	C26H34O12	743.309	538.205	2.5254	[M+H]+	2.54051	3	0.7267	rp	-	57509528	-	-	-	590	450.11	498.71	35847	25193.5	19877.5	9071.42	9175.75	9160.71	-	1.3063	0.0300641	52.5844	5.71656	up
T3_positive	MW0002892	2-Chloro-5-nitro-N-4-pyridinylbenzamide	Benzene and substituted derivatives	Benzene and substituted derivatives	C12H8ClN3O3	278.037	277.025	1.2058	[M+H]+	10.098	3	0.7267	rp	-	2777391	HMDB0246142	-	-	1004.05	707.37	2103.68	12372.4	12964.1	13532.9	6905.5	7127.82	6948.58	-	1.26817	4.11064e-05	10.1883	3.34884	up
T3_positive	MW0122851	Ampiroxicam	Heterocyclic compounds	Heterocyclic compounds	C20H21N3O7S	448.118	447.11	7.5697	[M+H]+	0.794471	3	0.7262	rp	-	2176	HMDB0248361	-	-	871.78	1329.82	2228.73	3465.74	4322.31	5658.99	4330.4	4405.8	4636.09	-	1.16106	0.0227861	3.03522	1.6018	up
T3_positive	MW0115925	(4-Ethylnaphthalen-1-yl)[1-(5-fluoropentyl)-1H-indol-3-yl]methanone	Aldehyde,Ketones,Esters	Ketones	C26H26FNO	388.212	387.2	7.1262	[M+H]+	11.071	3	0.7254	rp	-	71308187	-	85079	-	19794.6	20333.1	16070.5	14446.7	12251.6	12821.5	17964.6	17936.1	17565	-	1.1667	0.0354948	0.703224	-0.507944	down
T3_positive	MW0145263	Arg-Arg-Lys-Ser-His	Amino acid and Its metabolites	Small Peptide	C27H50N14O7	682.404	682.399	3.9211	[M+]+	10.2907	3	0.7248	rp	-	-	-	264716	-	3749.49	3523.95	3201.67	2595.52	2573.42	2775.64	2496.22	2557.89	2501.63	-	1.22707	0.0216878	0.758424	-0.398923	down
T3_positive	MW0152151	Laurencione diacetate	Aldehyde,Ketones,Esters	Ketones	C9H12O5	223.063	200.069	6.7973	[M+Na]+	11.67	3	0.7231	rp	-	-	-	65391	-	20165.7	20344.1	20037.2	5678.73	11867.7	6502.73	33975.8	31882.1	33116.3	-	1.19459	0.0243032	0.397198	-1.33207	down
T3_positive	MW0157843	Thr-Tyr-Ile-Arg	Amino acid and Its metabolites	Small Peptide	C25H41N7O7	552.329	551.307	5.3342	[M+H]+	18.1361	3	0.7227	rp	-	-	-	239233	-	956.65	885.08	1431.63	10505.9	9050.61	12034.5	5214.9	5167.82	5147.67	-	1.29837	0.00652048	9.65094	3.27067	up
T3_positive	MW0152139	(5-methyl-2-methylidenehexyl) (Z,2S)-2-hydroxy-6-[(1S,4Z,6E,9R,11R,12S,13S,14E,16Z,19E,21R,23R,24R)-11-hydroxy-24-(hydroxymethyl)-12,15,24-trimethyl-3-oxo-2,22,26-trioxatricyclo[19.3.1.19,13]hexacosa-4,6,14,16,19-pentaen-23-yl]hex-4-enoate	Heterocyclic compounds	Heterocyclic compounds	C41H60O9	696.423	696.424	7.9038	[M+]+	6.95742	3	0.722	rp	-	56928132	-	-	C19903	14422	12171	14249.6	5456.06	9420.64	7556.81	13864.4	14646.9	14758.2	-	1.15812	0.0155382	0.549268	-0.864419	down
T3_positive	MW0156909	Ser-Ser-Gly-Arg-Ser	Amino acid and Its metabolites	Small Peptide	C17H32N8O9	493.23	492.229	2.45	[M+H]+	14.8961	3	0.7213	rp	-	-	-	264285	-	348.88	290.93	260.53	11900	7634.48	7967.86	4449.22	4473.67	4479.29	-	1.30651	0.0230035	30.5466	4.93294	up
T3_positive	MW0114307	D-Mannosamine	Carbohydrates and Its metabolites	Carbohydrates and Its metabolites	C6H13NO5	162.076	179.079	1.2157	[M+H-H2O]+	1.31468	3	0.7189	rp	-	440049	-	-	C03570	35068.9	29667.6	34948.8	148598	157852	132221	88922.6	88495.5	86518.1	-	1.30479	0.00293774	4.40056	2.13769	up
T3_positive	MW0012940	1-Oleoyl-2-myristoyl-sn-glycero-3-phosphocholine	GP	PC	C40H78NO8P	732.547	731.547	7.6021	[M+H]+	7.68842	3	0.718	rp	-	24778931	HMDB0008097	-	C00157	35363.2	31363.1	32375.1	22492.8	24537.2	24170.3	24350.2	24154.6	24251.3	ko00564,ko00590,ko00592,ko01100,ko01110	1.26731	0.00619752	0.718459	-0.477021	down
T3_positive	MW0150917	His-Glu-Glu-Arg-Gln	Amino acid and Its metabolites	Small Peptide	C27H43N11O11	698.332	697.314	2.5514	[M+H]+	14.8454	3	0.7155	rp	-	-	-	264798	-	927.79	4121.38	2332.1	16397.7	12064	14057.1	7282.63	7389.79	7393.75	-	1.19129	0.00231155	5.76037	2.52616	up
T3_positive	MW0110191	Tyr-Asp-Leu	Amino acid and Its metabolites	Small Peptide	C19H27N3O7	410.188	409.185	8.0522	[M+H]+	10.6501	3	0.7132	rp	-	485277	-	23160	-	2159.41	1255.2	2673.5	693.83	124.85	401.82	1274.33	1085.68	1220.78	-	1.10919	0.0448183	0.200473	-2.31852	down
T3_positive	MW0051094	1-Osbondoyl-3-osbondoyl-sn-glycerol	GL	DG	C47H72O5	717.555	716.538	8.3124	[M+H]+	11.3345	3	0.7121	rp	-	131766824	HMDB0056359	-	C00641	9494.64	10666.5	9765.07	8047.82	8679.95	8012.63	7662.47	7660.35	7596.55	ko00561,ko00562,ko00564,ko01100,ko01110,ko04070	1.1946	0.0207306	0.826714	-0.27454	down
T3_positive	MW0055331	N-Nitrosotomatidine	Alkaloids	Steroid alkaloids	C27H44N2O3	445.339	444.335	8.0176	[M+H]+	1.13257	3	0.7113	rp	-	543551	HMDB0034102	-	-	16080.8	17317.9	15274.9	11332.3	14256.4	13039.2	13049	13048.2	12996.3	-	1.10443	0.0373357	0.793612	-0.333494	down
T3_positive	MW0150327	Gly-Asp-Ile-Val-Ile	Amino acid and Its metabolites	Small Peptide	C23H41N5O8	515.294	515.295	6.4008	[M+]+	0.303111	3	0.7112	rp	-	-	-	264162	-	2645.83	1161.08	3090.24	9448.49	5545.12	10408.6	5206.06	5205.01	5080.58	-	1.15939	0.0394316	3.683	1.88088	up
T3_positive	MW0142576	(1R,2S,5S,6S)-2-(3-carboxypropanoyl)-5-[(1-carboxyvinyl)oxy]-6-hydroxycyclohex-3-ene-1-carboxylic acid	Organic acid and Its derivatives	Organic acid and Its derivatives	C14H16O9	329.078	328.079	2.7009	[M+H]+	21.825	3	0.7093	rp	-	24883454	-	-	-	602.69	819.25	583.87	1935.21	1949.65	2148.3	1215.55	1218.61	1216.08	-	1.28593	0.000203895	3.00784	1.58873	up
T3_positive	MW0109306	Pro-Asn-Lys	Amino acid and Its metabolites	Small Peptide	C15H27N5O5	358.201	357.201	7.7925	[M+H]+	13.1148	3	0.7079	rp	-	145457403	-	23258	-	2181.41	1902.25	1864.46	843.93	555.43	1265.12	1203.72	1173.79	1184.63	-	1.13741	0.0189221	0.447953	-1.15858	down
T3_positive	MW0152322	Leu-Glu-Ile-Glu	Amino acid and Its metabolites	Small Peptide	C22H38N4O9	467.247	502.264	4.3237	[M+H-2H2O]+	6.71519	3	0.7054	rp	-	-	-	176822	-	4024.95	5260.79	4926.1	43680.9	30057.2	30658.7	17148	17156.1	17346.3	-	1.29893	0.0205651	7.34576	2.87691	up
T3_positive	MW0140189	(10S)-Juvenile hormone III diol phosphate	Hormones and hormone related compounds	Hormones and hormone related compounds	C16H29O7P	329.16	364.165	7.431	[M+H-2H2O]+	22.275	3	0.7052	rp	-	24892784	-	-	-	18922.3	16339.1	17346.6	12945.5	11892.2	12318.8	12958.4	12841.4	12845.4	-	1.26095	0.0114268	0.706288	-0.501672	down
T3_positive	MW0141823	1-Palmitoyl-2-(5-hydroxy-8-oxo-6-octenedioyl)-sn-glycero-3-phosphatidylcholine	GP	PC	C32H60NO11P	648.395	665.39	8.6072	[M+H-H2O]+	5.66088	3	0.7042	rp	-	5282301	-	-	C00157	3401.17	4061.36	4012.46	2720.18	3023.55	2510.65	2452.37	2379.49	2610.86	ko00564,ko00590,ko00592,ko01100,ko01110	1.18663	0.0180114	0.719337	-0.475261	down
T3_positive	MW0162070	2-o-(alpha-d-Galactopyranosyl)-3-o-methyl-d-chiro-inositol	Heterocyclic compounds	Heterocyclic compounds	C13H24O11	441.091	356.132	1.1123	[M+K+HCOOH]+	21.7411	3	0.7012	rp	-	25200426	-	-	-	16698.4	12632.3	15259.3	29447.3	28480.9	26167	28304.9	28515.7	29172.5	-	1.26353	0.00121029	1.88597	0.915303	up
T3_positive	MW0147513	(3Z,5E)-4,6-dihydroxy-5-methyl-2-oxohexa-3,5-dienoic acid	Organic acid and Its derivatives	Organic acid and Its derivatives	C7H8O5	286.915	172.037	8.9026	[M-2H+3K]+	6.075	3	0.7009	rp	-	49787041	-	-	C18318	255967	243714	240469	196805	181013	198787	204639	203861	203873	-	1.26067	0.0019715	0.779038	-0.360234	down
T3_positive	MW0143311	4-Fluorocyclohexadiene-cis,cis-1,2-diol	Alcohol and amines	Alcohols	C6H7FO2	197	130.043	8.9026	[M-2H+3Na]+	10.225	3	0.7009	rp	-	11829464	-	-	-	168010	161298	168520	144159	142396	146521	144832	144435	144388	-	1.27633	0.00379093	0.86993	-0.201028	down
T3_positive	MW0145478	Arg-Pro-Glu	Amino acid and Its metabolites	Small Peptide	C16H28N6O6	401.204	400.207	2.2174	[M+H]+	17.5175	3	0.6973	rp	-	101118232	-	18852	-	3258.26	3266.57	2572.99	9191.59	6950.24	7306.11	4196.97	4198.01	4147.67	-	1.27493	0.0134941	2.57731	1.36587	up
T3_positive	MW0150127	Glu-Pro-Pro-Arg-Asp	Amino acid and Its metabolites	Small Peptide	C25H40N8O10	613.283	612.287	6.622	[M+H]+	15.9383	3	0.6968	rp	-	-	-	264856	-	77.3	338.93	841.56	4113.4	2937.09	4615.49	1266.52	1267.81	1233.54	-	1.15411	0.00984492	9.27498	3.21334	up
T3_positive	MW0155179	Phe-Glu-His-Phe-Leu	Amino acid and Its metabolites	Small Peptide	C35H45N7O8	691.323	691.333	2.4418	[M+]+	14.9928	3	0.6964	rp	-	-	-	264821	-	4971.96	8817.81	5613	43443.5	27897.1	31599.3	18395.5	18257.2	18381.1	-	1.27109	0.0217335	5.30542	2.40747	up
T3_positive	MW0149863	Gln-Val-Leu-Arg	Amino acid and Its metabolites	Small Peptide	C22H42N8O6	515.318	514.323	3.4297	[M+H]+	22.3159	3	0.6873	rp	-	-	-	214473	-	455.73	662.46	327.82	13530	8431.07	8143.36	3207.09	2928.05	3489.5	-	1.29381	0.0316071	20.819	4.37983	up
T3_positive	MW0109521	Racecadotril	Benzene and substituted derivatives	Benzene and substituted derivatives	C21H23NO4S	424.098	385.135	3.2543	[M+K]+	9.2728	3	0.6863	rp	-	107751	HMDB0251682	-	-	561.74	401.01	511.25	1356.74	1965.43	2210.5	870.53	854.58	863.6	-	1.26543	0.0298787	3.75351	1.90824	up
T3_positive	MW0114404	Erucoylacetone	Aldehyde,Ketones,Esters	Ketones	C25H46O2	379.36	378.35	8.0124	[M+H]+	7.50501	3	0.6856	rp	-	15463583	HMDB0035951	-	-	3114.3	3633.46	4100.67	1049.35	1455.08	1254.6	2192.88	2203.32	2109.05	-	1.2795	0.00695087	0.346505	-1.52905	down
T3_positive	MW0149616	Gln-Ala-Met	Amino acid and Its metabolites	Small Peptide	C13H24N4O5S1	331.148	348.147	0.6256	[M+H-H2O]+	5.4461	3	0.6855	rp	-	145454955	-	23039	-	26370.3	27163.8	26104.2	5709.09	6104.28	4850.88	16327	16175.5	16251.6	-	1.30758	2.20839e-06	0.209249	-2.25671	down
T3_positive	MW0155429	Phe4Cl-Met-OH	Amino acid and Its metabolites	Small Peptide	C19H19ClN2O6S	439.062	438.065	3.2384	[M+H]+	21.1195	3	0.6842	rp	-	-	-	65196	-	2090.74	1777.85	1731.81	5439.64	6300.95	6788	3421.66	3456.02	3422.93	-	1.29787	0.00519758	3.30844	1.72615	up
T3_positive	MW0056812	PC(14:0/P-18:1(11Z))	GP	PC	C40H78NO7P	716.552	715.552	8.3124	[M+H]+	8.50533	3	0.6828	rp	-	53478619	HMDB0007897	-	C00157	28181.5	25600.9	25026.5	19182.2	19092.3	19553.2	19962.1	20067.4	20020.9	ko00564,ko00590,ko00592,ko01100,ko01110	1.27538	0.0170614	0.733771	-0.446599	down
T3_positive	MW0011927	1,2-Distearoyl-sn-glycero-3-phosphocholine	GP	PC	C44H88NO8P	789.62	789.625	6.9476	[M+]+	3.13326	3	0.6822	rp	-	94190	HMDB0008036	-	C00157	83002.2	94520.9	68290.1	21120.1	27109.8	24329	13456.2	11650.4	11684.1	ko00564,ko00590,ko00592,ko01100,ko01110	1.28877	0.0133773	0.295179	-1.76034	down
T3_positive	MW0004036	Isovanillic acid	Benzene and substituted derivatives	Benzene and substituted derivatives	C8H8O4	232.049	168.042	3.1839	[M+CH3CN+Na]+	21.65	3	0.6807	rp	-	12575	HMDB0060003	-	-	2595.26	2464.85	2385.47	490.67	1391.34	460.33	662.64	695.99	652.97	-	1.15193	0.0268855	0.314595	-1.66843	down
T3_positive	MW0124699	Lofepramine	Heterocyclic compounds	Heterocyclic compounds	C26H27ClN2O	441.166	418.181	0.8026	[M+Na]+	9.27502	3	0.6798	rp	-	3947	HMDB0254150	-	-	445625	456632	383422	570123	578256	652068	478736	487055	480186	-	1.21465	0.00808988	1.40039	0.485825	up
T3_positive	MW0141396	13((2R,3S)-3-Pentyloxiranyl)-8Z-tridecenoic acid	FA	Oxidized lipids	C20H36O3	342.308	324.266	7.137	[M+NH4]+	20.0214	3	0.6772	rp	-	35028448	-	45269	-	132275	129714	145906	62336.8	96797.9	75047.4	85468	85408.8	86044.1	-	1.19339	0.0149316	0.574124	-0.800566	down
T3_positive	MEDL01778	Ganoderic acid Md	Terpenoids	Triterpene	C35H54O7	483.319	586.387	6.9476	[M+H-H2O]+	17.0792	3	0.6763	rp	-	131751708	HMDB0035331	-	-	50784.8	56234.5	44651.9	13083.7	19688.1	16449.5	25793.8	25558.5	25935.2	-	1.27789	0.00241172	0.324527	-1.62359	down
T3_positive	MW0154051	N-(2-Ethylhexyl)-5-norbornene-2,3-dicarboximide	Alcohol and amines	Amines	C17H25NO2	276.196	275.188	7.8012	[M+H]+	5.82261	3	0.6762	rp	-	8227	HMDB0256988	-	C18795	7397.13	7476.71	7232.16	4693.61	4717.24	4605.82	4402.77	4446.48	4641.05	-	1.31041	8.51051e-05	0.634066	-0.657294	down
T3_positive	MW0106331	Cys-Thr	Amino acid and Its metabolites	Small Peptide	C7H14N2O4S	205.078	222.067	1.5543	[M+H-H2O]+	13.0497	3	0.6739	rp	-	20574757	HMDB0028785	-	-	8521.67	7897.22	9068.61	29275.5	30650.2	31104.1	9664.43	9396.38	8378.3	-	1.30888	2.44725e-05	3.57154	1.83655	up
T3_positive	MW0142079	2,5-Dichloro-cis,cis-muconic acid	Organic acid and Its derivatives	Organic acid and Its derivatives	C6H4Cl2O4	256.964	209.949	8.7986	[M+HCOO+2H]+	6.975	3	0.6732	rp	-	9776836	-	-	C07095	338948	316358	301679	252051	251028	222765	256446	259274	264413	ko01100	1.22717	0.00624678	0.75847	-0.398837	down
T3_positive	MW0129951	2-({hydroxy[2,4,5-trihydroxy-3-(3,4,5-trihydroxybenzoyloxy)phenyl]methylidene}amino)acetic acid	Organic acid and Its derivatives	Organic acid and Its derivatives	C16H13NO11	396.065	395.049	2.8357	[M+H]+	20.0308	3	0.6689	rp	-	131834714	HMDB0128374	-	-	11426.2	8577.16	9313.49	23300.5	25469.2	23450.4	21111.1	20846.6	20956.5	-	1.28646	0.000256472	2.46343	1.30067	up
T3_positive	MW0140288	(2R,2'R)-3,3'-disulfanediylbis(2-acetamidopropanoic acid)	Others	Others	C10H16N2O6S2	325.058	324.045	1.9028	[M+H]+	17.2882	3	0.6686	rp	-	-	-	65468	-	93565.4	98561.2	97909.4	67746.9	49246.5	62328.5	84845.5	84310	84533.4	-	1.21633	0.0156492	0.618275	-0.69368	down
T3_positive	MW0194183	[(2S,6S,9R)-4,4,11,11-tetramethyl-3,5,7,10,12-pentaoxatricyclo[7.3.0.02,6]dodecan-6-yl]methyl sulfamate	Heterocyclic compounds	Heterocyclic compounds	C12H21NO8S	362.086	339.099	1.9552	[M+Na]+	5.01695	3	0.6683	rp	-	44309678	HMDB0005034	-	-	7147.03	7090.58	6582.76	39509.5	33711.3	37284.7	19606.5	19503.2	19479.7	-	1.30995	0.00290639	5.30756	2.40805	up
T3_positive	MW0158987	Val-Glu-Gly-Lys-Asp	Amino acid and Its metabolites	Small Peptide	C22H38N6O10	569.265	546.265	2.569	[M+Na]+	17.7059	3	0.6682	rp	-	-	-	264193	-	2384.29	1761.64	3263.96	36654.2	30651	31119.3	16096.6	16093.6	15881.1	-	1.29918	0.00277464	13.2829	3.73149	up
T3_positive	MW0168336	[5,12,13,14-tetrahydroxy-4-(hydroxymethyl)-9-oxo-11-{6,7,13,14-tetrahydroxy-3,10-dioxo-2,9-dioxatetracyclo[6.6.2.0,(1).0(1)(1),(1)]hexadeca-1(15),4,6,8(16),11,13-hexaen-5-yl}-3,8-dioxatricyclo[8.4.0.0(2),]tetradeca-1(14),10,12-trien-6-yl]oxidanesulfonic acid	Others	Others	C27H18O20S	695.013	694.011	2.2526	[M+H]+	9.6884	3	0.6667	rp	-	131835791	HMDB0129544	-	-	889.26	1157.52	642.66	42261	26564.5	34834.4	14090.5	14088.4	13991.1	-	1.30365	0.017577	38.5433	5.26841	up
T3_positive	MW0141345	12-trans-Hydroxy juvenile hormone III	Hormones and hormone related compounds	Hormones and hormone related compounds	C16H26O4	324.217	282.183	7.247	[M+CH3CN+H]+	0.975	3	0.6657	rp	-	11011465	-	-	-	24176.2	20083.2	22749.2	6570.05	13379.2	10108.7	17732.5	17465.1	17584.9	-	1.17297	0.00991964	0.448569	-1.1566	down
T3_positive	MW0011888	2-Azaniumylethyl 2,3-di(tetradecanoyloxy)propyl phosphate	GP	PE	C33H66NO8P	635.456	635.453	7.4295	[M+]+	6.07716	3	0.6656	rp	-	75228634	HMDB0008821	-	C00350	7237.89	6152.98	10065.7	3334.62	1578.24	2093.83	3471.88	3314.82	3460.73	ko00563,ko00564,ko01100,ko01110,ko04136,ko04138	1.20523	0.0272993	0.298709	-1.74319	down
T3_positive	MW0144736	Ala-Ser-Thr	Amino acid and Its metabolites	Small Peptide	C10H19N3O6	278.142	277.127	1.2356	[M+H]+	19.3852	3	0.6653	rp	-	145453669	-	19866	-	7882.57	6871.19	10586.4	19184.7	21490.3	26406.1	20433.3	20799.2	20822.9	-	1.24902	0.0101264	2.64722	1.40448	up
T3_positive	MW0159235	Val-Val-Asp-Phe-Ser	Amino acid and Its metabolites	Small Peptide	C26H39N5O9	566.273	565.275	3.0958	[M+H]+	20.5568	3	0.6632	rp	-	-	-	264248	-	1227.54	2272.33	1408.99	16802.7	11419.9	12386.1	7166.69	7114.07	7001.36	-	1.28573	0.016026	8.27253	3.04833	up
T3_positive	MW0146058	Asp-Asp-Phe	Amino acid and Its metabolites	Small Peptide	C17H21N3O8	378.133	395.133	2.1123	[M+H-H2O]+	8.87684	3	0.6622	rp	-	471581	-	22285	-	14491.7	16372.6	11105.4	32594.7	35016.9	37825	20018.8	19963.9	20050.6	-	1.26893	0.000608483	2.5122	1.32895	up
T3_positive	MW0105214	4-Hepteneoylglycine	Amino acid and Its metabolites	Amino acid derivatives	C9H15NO3	186.118	185.105	7.7058	[M+H]+	13.1064	3	0.6615	rp	-	131802910	HMDB0094730	-	-	228783	286483	210467	135189	143190	122458	206115	197255	202947	-	1.23949	0.034794	0.552319	-0.856426	down
T3_positive	MW0163708	(2S)-2-azaniumyl-5-(hydroxyamino)pentanoate	Others	Others	C5H12N2O3	319.162	148.085	0.7464	[2M+Na]+	7.55	3	0.6589	rp	-	44237382	-	-	-	20195.3	18761.8	19949.4	6102.39	6943.73	9539.39	9162.96	9243.23	9160.31	-	1.26444	0.00267142	0.383413	-1.38303	down
T3_positive	MW0107368	Hoiamide B	Alcohol and amines	Amines	C45H73N5O10S3	939.435	939.452	2.9595	[M+]+	19.9025	3	0.6567	rp	-	46919100	-	65382	-	185.04	117.3	50.83	1117.1	695.29	650.57	1251.65	1294.88	1256.87	-	1.21629	0.0348633	6.97387	2.80196	up
T3_positive	MEDP1166	PC(16:0/2:0)	GP	PC	C26H52NO8P	520.34	537.343	6.7604	[M+H-H2O]+	0.643924	3	0.6543	rp	-	16759367	-	-	C00157	1.76172e+07	1.38428e+07	1.92681e+07	5.43974e+07	3.64278e+07	5.00584e+07	3.53373e+07	3.52225e+07	3.50931e+07	ko00564,ko00590,ko00592,ko01100,ko01110	1.25593	0.0234449	2.77723	1.47365	up
T3_positive	MW0157774	Thr-Phe-Val-Arg	Amino acid and Its metabolites	Small Peptide	C24H39N7O6	522.316	521.296	2.9372	[M+H]+	21.3194	3	0.6538	rp	-	-	-	233433	-	111.63	12.62	17.12	3455.47	2278.35	2221.71	747.32	763.73	770.99	-	1.25371	0.0224285	56.2745	5.81441	up
T3_positive	MW0127865	(2-{5,7-dihydroxy-4-oxo-8-[3,4,5-trihydroxy-6-(hydroxymethyl)oxan-2-yl]-2-(2,4,5-trihydroxyphenyl)-4H-chromen-6-yl}-3,5-dihydroxy-6-(hydroxymethyl)oxan-4-yl)oxidanesulfonic acid	Organic acid and Its derivatives	Organic acid and Its derivatives	C27H30O20S	689.116	706.105	1.9028	[M+H-H2O]+	18.0156	3	0.6525	rp	-	131833378	HMDB0126999	-	-	10155	8087.19	8586.65	5063.51	4104.02	4364.42	6583.13	6678.16	6675.7	-	1.26525	0.00914439	0.504381	-0.987415	down
T3_positive	MW0109003	Opiorphin	Alcohol and amines	Polyamines	C29H48N12O8	675.332	692.372	2.3518	[M+H-H2O]+	11.7974	3	0.6508	rp	-	25195667	HMDB0059792	-	-	907.04	1426.17	800.54	10290.2	6238.41	6433.53	3839.57	3677.82	3754.63	-	1.27705	0.0352215	7.32736	2.87329	up
T3_positive	MW0054526	LysoPC(18:3(6Z,9Z,12Z))	GP	LPC	C26H48NO7P	518.322	517.317	7.4122	[M+H]+	2.49566	3	0.6501	rp	-	52924045	HMDB0010387	-	C00157	221869	127013	372614	982867	1.55374e+06	1.12224e+06	478252	449990	479036	ko00564,ko00590,ko00592,ko01100,ko01110	1.21706	0.0177833	5.07119	2.34232	up
T3_positive	MW0145884	Asn-Ser-Glu-Asp-Thr	Amino acid and Its metabolites	Small Peptide	C20H32N6O13	565.209	564.203	7.4381	[M+H]+	14.031	3	0.6501	rp	-	-	-	264458	-	1934.23	1653.07	1436.69	182.76	296.19	272.41	431.67	421.03	382.08	-	1.29251	0.00738761	0.149554	-2.74126	down
T3_positive	MW0150869	His-Asp-Asp	Amino acid and Its metabolites	Small Peptide	C14H19N5O8	385.118	385.123	2.3581	[M+]+	10.159	3	0.6477	rp	-	145455780	-	20251	-	31436.8	36149.2	29270.7	138579	136004	132502	74314.9	74341.2	73615.5	-	1.30702	3.33659e-06	4.20295	2.0714	up
T3_positive	MW0015862	1-O-Hexadecyl-2-arachidonoyl-sn-glycero-3-phosphocholine	Benzene and substituted derivatives	Benzene and substituted derivatives	C44H82NO7P	732.548	767.583	7.0163	[M+H-2H2O]+	20.9763	3	0.6438	rp	-	6443139	HMDB0304650	-	-	19569.3	19428.9	14482.2	8789.38	8641.84	9484.49	8462.28	8869.91	8929.32	-	1.25479	0.0313398	0.503282	-0.990561	down
T3_positive	MW0142297	2-dehydro-3,6-dideoxy-6-sulfo-D-gluconic acid	Organic acid and Its derivatives	Organic acid and Its derivatives	C6H10O8S	225.009	242.01	0.5729	[M+H-H2O]+	6.36196	3	0.6418	rp	-	92136147	-	-	C21180	9510.05	7168.62	4990.92	23415.5	19705	24704.4	13855.8	14213.6	13324.6	-	1.24347	0.00161753	3.12996	1.64614	up
T3_positive	MW0015139	7-[(1R,2R,3S,5S)-2-[(4S)-4-(2,3-dihydro-1H-inden-2-yl)-4-hydroxybut-1-enyl]-3-fluoro-5-hydroxycyclopentyl]hept-5-enoic acid	Hormones and hormone related compounds	Hormones and hormone related compounds	C25H33FO4	399.234	416.236	8.1558	[M+H-H2O]+	9.51339	3	0.6414	rp	-	57370124	-	45019	-	2967.32	2203.81	2632.71	1000.94	1402.31	1252.74	1635.65	1602.38	1640.04	-	1.24206	0.0112442	0.468486	-1.09392	down
T3_positive	MW0142187	25-Hydroxy-24-epi-brassinolide	Heterocyclic compounds	Heterocyclic compounds	C28H48O7	497.343	496.34	7.206	[M+H]+	6.95868	3	0.6406	rp	-	443056	-	-	-	181701	112081	291519	512149	778083	578189	397883	396343	394849	-	1.17359	0.0153927	3.19224	1.67457	up
T3_positive	MW0151648	Ile-Val-Ile-Phe-Asn	Amino acid and Its metabolites	Small Peptide	C30H48N6O7	604.364	604.358	7.7751	[M+]+	7.91129	3	0.6405	rp	-	-	-	264158	-	7919.98	12168	9676.77	4382.75	3203.37	2050.28	2662.85	2510.6	2649.28	-	1.20263	0.0162125	0.323752	-1.62704	down
T3_positive	MW0054746	Melleolide M	Aldehyde,Ketones,Esters	Esters	C23H29ClO7	453.167	452.16	6.5701	[M+H]+	0.944053	3	0.6343	rp	-	10766085	HMDB0035068	-	-	566373	569480	511435	507431	439736	463413	341348	338714	341268	-	1.07113	0.0449926	0.856304	-0.223805	down
T3_positive	MW0131362	3-(4-Hydroxyphenyl)chroman-7-ol	Benzene and substituted derivatives	Benzene and substituted derivatives	C15H14O3	281.051	242.094	6.8199	[M+K]+	17.3668	3	0.6338	rp	-	382975	HMDB0243678	-	-	26862.8	24340	22076.7	9515.01	9265.05	7011.08	23481.9	25602.7	25232	-	1.28342	0.00165785	0.351956	-1.50653	down
T3_positive	MW0114942	N-Acetyl-alpha-D-galactosamine 1-phosphate	Organic acid and Its derivatives	Organic acid and Its derivatives	C8H16NO9P	266.036	301.056	0.5729	[M+H-2H2O]+	14.7312	3	0.6331	rp	-	4369589	HMDB0059626	-	C18060	8561.88	4701.91	3446.76	22071.2	15844.2	20703.8	10095	9684.36	9777.75	ko00520,ko01100,ko01250	1.20525	0.00517852	3.50792	1.81062	up
T3_positive	MW0159242	Val-Val-Leu	Amino acid and Its metabolites	Small Peptide	C16H31N3O4	330.246	329.231	7.9038	[M+H]+	19.2669	3	0.6329	rp	-	44230570	-	15881	-	29641.5	30101.2	28689.7	7640.45	15368.7	15492.2	19659.3	19388.3	19402.3	-	1.16079	0.0212534	0.435376	-1.19967	down
T3_positive	MW0144920	alpha,beta-Dihydroxyethyl-ThDP	Heterocyclic compounds	Heterocyclic compounds	C14H23N4O9P2S+	485.063	485.066	1.1123	[M+]+	2.862	3	0.6325	rp	-	57484379	-	-	-	14008.2	12583.7	11613.2	7981.77	6958.76	6429.81	8602.37	8539.75	8466.45	-	1.26092	0.00421082	0.559359	-0.838153	down
T3_positive	MW0110290	Tyrosyl-Methionine	Amino acid and Its metabolites	Amino acid derivatives	C14H20N2O4S	351.086	312.114	1.5368	[M+K]+	22.0662	3	0.6304	rp	-	46937960	HMDB0029111	-	-	2956.03	4505.19	2412.83	7339.84	6669.73	7242.53	3781.9	3834.35	3848.04	-	1.19007	0.0180553	2.15232	1.10589	up
T3_positive	MW0119751	6-((2-((4-(2,4-Dichlorophenyl)-5-(4-methyl-1H-imidazol-2-yl)pyrimidin-2-yl)amino)ethyl)amino)nicotinonitrile	Heterocyclic compounds	Heterocyclic compounds	C22H18Cl2N8	429.088	464.103	7.5713	[M+H-2H2O]+	1.18807	3	0.6297	rp	-	9956119	HMDB0250080	-	-	4336.95	5961.18	7585.89	11563.1	12514.3	14591.7	15225	15444.4	15212.7	-	1.19953	0.00593714	2.16222	1.11251	up
T3_positive	MW0106030	beta-Casomorphin(1-6)	FA	Others	C38H50N6O10	733.351	750.359	3.0254	[M+H-H2O]+	11.4047	3	0.6253	rp	-	131769861	HMDB0060168	-	-	2153.65	3685.45	1373.8	16206.9	10806.9	13342.7	6979.77	6913.38	6909.45	-	1.24156	0.00981412	5.59505	2.48415	up
T3_positive	MW0150330	Gly-Asp-Ser	Amino acid and Its metabolites	Small Peptide	C9H15N3O7	295.118	277.091	6.5587	[M+NH4]+	17.5802	3	0.6245	rp	-	24997747	-	22715	-	54509.5	51392.2	42470.7	41126.9	31195.9	31400.3	19901.5	19626	19537.7	-	1.09525	0.0383425	0.699074	-0.516483	down
T3_positive	MW0148046	Cys-Met-Phe	Amino acid and Its metabolites	Small Peptide	C17H25N3O4S2	400.129	399.129	1.3126	[M+H]+	18.0324	3	0.6244	rp	-	145454832	-	16054	-	82992.9	76214.8	71503.9	147006	127668	127889	96312.4	96883.8	97173.5	-	1.28003	0.00414052	1.74488	0.803126	up
T3_positive	MW0118644	1H-Indol-2-ol	Aldehyde,Ketones,Esters	Ketones	C8H7NO	151.096	133.053	7.9868	[M+NH4]+	23.2903	3	0.624	rp	-	65531	HMDB0244886	-	-	6804.1	7121.89	6027.62	3097.04	2142.91	3021.69	3561.8	3628.39	3676.72	-	1.25806	0.000964799	0.414042	-1.27215	down
T3_positive	MW0114517	Gentiobiosyl 2-methyl-6-oxo-2E,4E-heptadienoate	Aldehyde,Ketones,Esters	Esters	C20H30O13	461.174	478.169	1.4644	[M+H-H2O]+	20.3474	3	0.6239	rp	-	131751263	HMDB0032134	-	-	486.04	237.42	1034.29	8322.17	10409.9	9637.37	4255.81	4240.63	4274.65	-	1.25942	0.00179553	16.1396	4.01254	up
T3_positive	MW0138053	ent-Epicatechin-(4alpha->8)-ent-epicatechin 3'-gallate	Flavonoids	Flavonoid	C37H30O16	731.169	730.153	3.24	[M+H]+	10.6788	3	0.6205	rp	-	15593122	HMDB0037966	-	-	8294.27	8850.6	7577.5	19337.8	16334.9	16920.2	10315.7	10315.7	10304.1	-	1.29203	0.00431968	2.12734	1.08905	up
T3_positive	MW0153628	Met-Phe-Gln	Amino acid and Its metabolites	Small Peptide	C19H28N4O5S1	463.147	424.178	7.5762	[M+K]+	7.49528	3	0.6201	rp	-	145457031	-	19131	-	658.24	966.13	1301.93	3561.6	3585.28	4745.5	3679.31	3702.38	3680.02	-	1.25523	0.00723509	4.06396	2.02289	up
T3_positive	MW0107579	Isomultiflorenyl acetate	Aldehyde,Ketones,Esters	Esters	C32H52O2	469.394	468.397	7.6737	[M+H]+	21.3449	3	0.6162	rp	-	131752289	HMDB0038062	-	-	26776.9	26633.1	27254.4	20270.6	21101	19159.3	18957.2	18757.1	18748.2	-	1.28794	0.00361641	0.750403	-0.414262	down
T3_positive	MW0145086	Androsterone Enanthate	Hormones and hormone related compounds	Hormones and hormone related compounds	C26H42O3	385.319	402.313	5.9814	[M+H-H2O]+	14.1382	3	0.6161	rp	-	-	-	73560	-	24460.7	27268.4	24547.2	29458.7	31863.9	29906	21853.1	21668.1	21481.8	-	1.18106	0.0148691	1.19603	0.258251	up
T3_positive	MW0123194	Caffeine	Heterocyclic compounds	Heterocyclic compounds	C8H10N4O2	159.059	194.08	2.7449	[M+H-2H2O]+	18.8114	3	0.6145	rp	-	2519	HMDB0001847	1455	C07481	1067.24	874.91	1355.15	3135.45	3288.32	3547.33	2304.39	2305.78	2282.67	ko01100,ko01110	1.2775	0.000304888	3.02402	1.59647	up
T3_positive	MW0062214	N-[5-[5-[(3aS,6aR)-2-oxo-1,3,3a,4,6,6a-hexahydrothieno[3,4-d]imidazol-4-yl]pentanoylamino]pentyl]-7-[(1R,2S)-2-[(E,3S)-3-hydroxyoct-1-enyl]-5-oxocyclopent-3-en-1-yl]heptanamide	Hormones and hormone related compounds	Hormones and hormone related compounds	C35H58N4O5S	664.463	646.413	7.1409	[M+NH4]+	24.1269	3	0.6142	rp	-	71684697	-	-	-	66595.9	51389.2	45614.8	37989.1	28683.3	27184.2	34674.1	34878	34828.5	-	1.14801	0.0451773	0.573696	-0.801641	down
T3_positive	MW0063537	N-[(9Z)-3-hydroxytetradec-9-enoyl]sphingosine-1-phosphocholine	SP	SM	C37H73N2O7P	688.52	688.515	7.6193	[M+]+	8.0177	3	0.6118	rp	-	53481777	HMDB0013462	-	C00550	56151.3	52249.8	51051	40608.4	42166.6	39512.9	40402.1	40164.5	40313.2	ko00600,ko01100	1.2714	0.00590499	0.766926	-0.382841	down
T3_positive	MW0107763	Leu-Tyr	Amino acid and Its metabolites	Small Peptide	C15H22N2O4	295.165	294.158	2.5162	[M+H]+	0.65	3	0.6112	rp	-	273262	HMDB0028941	-	-	1313.04	62.02	504.71	7320.9	7121.43	6624.4	3258.77	3234.5	3259.48	-	1.12569	0.000462711	11.2071	3.48634	up
T3_positive	MW0144496	Ala-Asn-Ile-Lys	Amino acid and Its metabolites	Small Peptide	C19H36N6O6	445.266	444.27	4.3237	[M+H]+	24.556	3	0.6083	rp	-	-	-	108028	-	11829.5	15631.3	13826.7	113813	77398.1	80033.8	44921.7	45168.1	45004.5	-	1.29699	0.0218145	6.56966	2.71582	up
T3_positive	MW0111033	Ethylamine	Alcohol and amines	Amines	C2H7N	113.095	45.0578	6.8794	[2M+Na]+	24.25	3	0.6004	rp	-	6341	HMDB0013231	-	C00797	32157.7	33362.7	26270.3	17578	17101.3	17774.3	16445.6	17077.3	17028.7	-	1.26602	0.0259869	0.571448	-0.807306	down
T3_positive	MW0007378	Iobitridol	Benzene and substituted derivatives	Benzene and substituted derivatives	C20H28I3N3O9	835.928	834.896	2.6128	[M+H]+	24.3668	3	0.6001	rp	-	65985	HMDB0253508	-	-	790.34	948.04	83.08	14112.6	7868.75	11824.6	3932.17	4110.52	3749.94	-	1.18223	0.0259737	18.5598	4.21411	up
T3_positive	MW0123675	Dihydrogambogic acid	Organic acid and Its derivatives	Organic acid and Its derivatives	C38H46O8	631.316	630.319	2.3885	[M+H]+	21.6187	3	0.5974	rp	-	6857793	-	43965	-	403.84	336.7	447.39	10132.1	6010.57	7281.23	3780.44	3845.36	3733.8	-	1.30405	0.0259114	19.7182	4.30146	up
T3_positive	MEDP1886	Pro-val	Amino acid and Its metabolites	Small Peptide	C10H18N2O3	237.114	214.132	1.415	[M+Na]+	19.0416	3	0.5972	rp	-	142984	HMDB0029030	-	-	8614.4	6948.89	7809.43	4444.28	5007.37	5285.17	5373.05	5443.15	5378.14	-	1.23907	0.0130727	0.630514	-0.6654	down
T3_positive	MADP0556	Glu-Phe-Alanine	Amino acid and Its metabolites	Small Peptide	C17H23N3O6	366.167	365.159	2.2174	[M+H]+	15.1541	3	0.5963	rp	-	145455459	-	-	-	6328.38	5810.43	4802.53	1924.52	1416.58	2205.83	3560.55	3541.42	3560.99	-	1.26343	0.00488359	0.32742	-1.61079	down
T3_positive	MW0122759	Albendazole sulfone	Benzene and substituted derivatives	Benzene and substituted derivatives	C12H15N3O4S	336.046	297.078	4.4306	[M+K]+	12.5714	3	0.5961	rp	-	53174	HMDB0060561	-	C16626	14377.4	13471.5	12874.9	12094	11623.9	11799.3	12947.9	13023.8	13031.7	-	1.17177	0.0473477	0.872149	-0.197354	down
T3_positive	MW0048962	Clupanodonyl carnitine	FA	CAR	C29H47NO4	474.349	473.351	7.206	[M+H]+	15.2166	3	0.5948	rp	-	53477839	HMDB0006496	-	-	99118.3	90765.9	85247.6	7947.59	23324.6	12524.9	39250.1	39599.7	39813.3	-	1.25043	0.000243749	0.159186	-2.65122	down
T3_positive	MW0009579	Prucalopride	Benzene and substituted derivatives	Benzene and substituted derivatives	C18H26ClN3O3	368.179	367.166	3.9325	[M+H]+	16.7825	3	0.5865	rp	-	3052762	HMDB0256880	-	-	1228	2802.37	2654.34	10780.5	8877.06	8338.28	5310	5400.23	5395.73	-	1.22997	0.00229351	4.18804	2.06627	up
T3_positive	MW0016043	[(1R,2S,4R,5S,6S,11R,12R,14S,16R)-5,6,11-Trihydroxy-4-(hydroxymethyl)-8,12,15,15-tetramethyl-7-oxo-3-oxapentacyclo[9.5.0.02,4.06,10.014,16]hexadec-8-en-14-yl] dodecanoate	Heterocyclic compounds	Heterocyclic compounds	C32H50O8	563.349	562.351	7.8794	[M+H]+	14.0453	3	0.5848	rp	-	57509453	-	-	-	10192.5	7356.72	10917.4	34597	46313.9	43949	26649.8	26641.4	26685.5	-	1.28485	0.00776058	4.38619	2.13297	up
T3_positive	MW0000590	(2-benzyl-3-oxopropoxy)sulfonic acid	Benzene and substituted derivatives	Benzene and substituted derivatives	C10H12O5S	267.021	244.041	4.2715	[M+Na]+	21.3128	3	0.5825	rp	-	131837490	HMDB0133637	-	-	6045.14	6153.72	6306.21	5636.19	5358.02	5248.02	3653.07	3661.42	3610.09	-	1.2277	0.00829009	0.877718	-0.188171	down
T3_positive	MW0055663	1-octadecanoyl-2-(9Z-octadecenoyl)-sn-glycero-3-phosphate	GP	PA	C39H75O8P	702.536	702.52	7.9349	[M+]+	23.3785	3	0.5813	rp	-	24779560	-	40933	-	91833.5	86771	87191.9	62246.9	67627.9	65860.5	71562.8	71213.6	71959.4	-	1.28817	0.000502129	0.73641	-0.441418	down
T3_positive	MW0141393	14,15-DHET-d11	FA	Others	C20H23D11O4	350.327	349.315	8.035	[M+H]+	13.3357	3	0.5796	rp	-	-	-	96407	-	4659.36	3163.6	4217.74	415.81	1289.53	1144.98	1791.21	1850.07	1817.68	-	1.18084	0.00737948	0.236724	-2.07872	down
T3_positive	MW0053901	Medica 16	FA	FFA	C20H38O4	343.295	342.277	6.7604	[M+H]+	22.6073	3	0.5775	rp	-	121871	HMDB0254402	-	-	10412.3	10047.2	8483.58	1312.77	2167.95	825.28	2543.35	2550.22	2272.62	-	1.26275	0.000675978	0.148775	-2.7488	down
T3_positive	MW0128690	[3-(7-Hydroxy-4-oxochromen-2-yl)phenyl] hydrogen sulate	Organic acid and Its derivatives	Organic acid and Its derivatives	C15H10O7S	317.002	334.015	5.42	[M+H-H2O]+	24.0034	3	0.5761	rp	-	131837265	HMDB0133344	-	-	44096.7	51806	41281.9	37182.7	30749.5	34504.6	33984.1	34045.6	34034.3	-	1.12192	0.0452725	0.746707	-0.421386	down
T3_positive	MW0142190	(1S,2R,4R,5S,7S,11S,15R,16S)-4,5-dihydroxy-2,16-dimethyl-15-[(2S,3R,4R,5S)-3,4,7-trihydroxy-5,6-dimethylheptan-2-yl]-9-oxatetracyclo[9.7.0.02,7.012,16]octadecan-8-one	Heterocyclic compounds	Heterocyclic compounds	C28H48O7	497.343	496.34	6.9655	[M+H]+	9.94338	3	0.5752	rp	-	56928129	-	-	C19874	41156	27054.3	58338	225707	329928	247436	154716	155499	154553	ko01110	1.26706	0.0138435	6.34597	2.66584	up
T3_positive	MW0151266	Hydroxyspheroidenone	Aldehyde,Ketones,Esters	Ketones	C41H60O3	601.471	600.454	7.6541	[M+H]+	13.9242	3	0.5746	rp	-	16061267	-	-	-	38200.3	35986	34601.1	27457	27772.3	27672.8	27328	27236.4	27301.2	-	1.2833	0.0138905	0.762056	-0.392031	down
T3_positive	MW0057922	1-(1Z-octadecenyl)-2-(9Z-octadecenoyl)-sn-glycero-3-phosphocholine	GP	PC-P	C44H86NO7P	810.6	771.614	6.9476	[M+K]+	20.0757	3	0.573	rp	-	42607428	HMDB0011243	-	C00157	75388.4	80167.9	56921.7	13487.7	15394.3	14844.8	13796.7	13359.6	14357.7	ko00564,ko00590,ko00592,ko01100,ko01110	1.29926	0.0150428	0.205795	-2.28072	down
T3_positive	MW0054903	Methyl nomilinate 17-glucoside	Aldehyde,Ketones,Esters	Esters	C35H50O16	709.304	726.31	2.7892	[M+H-H2O]+	10.5142	3	0.5705	rp	-	85262693	HMDB0039887	-	-	53.92	68.39	214.61	2903.82	2596.19	2782.75	1182.57	1066.73	1161.63	-	1.27257	8.38206e-05	24.5838	4.61963	up
T3_positive	MEDP1318	LPC(0:0/22:4)	GP	LPC	C30H55NO7P	537.339	572.372	5.8792	[M+H-2H2O]+	19.2521	3	0.5676	rp	-	-	-	-	C00157	1255.77	828.08	1150.48	6445.11	4810.89	7988.11	2376.77	2522.45	2503.11	ko00564,ko00590,ko00592,ko01100,ko01110	1.28332	0.0263723	5.94995	2.57288	up
T3_positive	MW0049512	1-Myristoyl-3-osbondoyl-sn-glycerol	GL	DG	C39H66O5	615.487	614.491	7.9657	[M+H]+	16.3106	3	0.5663	rp	-	131801706	HMDB0055974	-	C00641	71529.9	67540.9	69498.6	46187.2	41679.8	46726.1	53042.5	52730	53049.4	ko00561,ko00562,ko00564,ko01100,ko01110,ko04070	1.2893	0.000405741	0.645315	-0.631924	down
T3_positive	MW0156401	Rifamycin W	Heterocyclic compounds	Heterocyclic compounds	C35H45NO11	638.284	655.299	2.3755	[M+H-H2O]+	18.9344	3	0.5652	rp	-	10100825	-	-	-	300.34	538.86	694.55	13043.8	7518.22	7661.15	5149.75	4983.39	4941.35	-	1.28506	0.0388619	18.4014	4.20175	up
T3_positive	MW0006552	Chloroxylenol	Benzene and substituted derivatives	Phenolics	C8H9ClO	121.028	156.034	7.247	[M+H-2H2O]+	19.2809	3	0.5622	rp	-	2723	HMDB0246387	-	C14715	10061.5	10093.1	9722.46	4999.22	7044.5	6411.28	8883.54	8850.99	8848.99	-	1.21323	0.0209928	0.617699	-0.695025	down
T3_positive	MW0050715	1-Arachidonoyl-3-docosahexaenoyl-sn-glycerol	GL	DG	C45H68O5	689.524	688.507	7.6193	[M+H]+	11.1341	3	0.5579	rp	-	131802038	HMDB0056341	-	C00641	18201.2	19422.1	18083.3	14197.3	14079.8	13804.2	14128	13988.2	14068.4	ko00561,ko00562,ko00564,ko01100,ko01110,ko04070	1.29291	0.00579139	0.755409	-0.40467	down
T3_positive	MW0139016	[(1S,2R,6R)-2-[2,6-dihydroxy-4-[6-hydroxy-7-(3-methylbut-2-enyl)-1-benzofuran-2-yl]phenyl]-6-(2,4-dihydroxyphenyl)-4-methylcyclohex-3-en-1-yl]-[2,4-dihydroxy-3-(3-methylbut-2-enyl)phenyl]methanone	Benzene and substituted derivatives	Benzene and substituted derivatives	C44H44O9	717.291	716.298	8.7812	[M+H]+	23.2678	3	0.5572	rp	-	102375662	HMDB0035940	-	-	29798.5	18886.2	35901.9	105717	80237.1	91142.2	70173.1	69368.4	70156.1	-	1.24328	0.00319987	3.27589	1.71189	up
T3_positive	MW0144793	Ala-Val-Cys	Amino acid and Its metabolites	Small Peptide	C11H21N3O4S1	330.078	291.125	2.5125	[M+K]+	22.8704	3	0.5554	rp	-	145453716	-	16648	-	6661.43	5978.69	5749.52	4949.88	4048.91	4032.27	4921.46	4901.54	4817.37	-	1.18771	0.0122202	0.708609	-0.496939	down
T3_positive	MW0053612	ginsenoside Mc	Steroids	Steroid	C41H70O12	737.502	754.487	7.6021	[M+H-H2O]+	23.7814	3	0.5537	rp	-	9896928	HMDB0062593	-	-	17148.8	13677	15727.8	9220.84	10306.2	9596.42	10748	10917.5	10757.7	-	1.25253	0.0208349	0.62559	-0.67671	down
T3_positive	MW0109000	O-Phospho-L-tyrosine	Organic acid and Its derivatives	Phosphoric acids	C9H12NO6P	303.066	261.04	2.5341	[M+CH3CN+H]+	20.55	3	0.5476	rp	-	30819	HMDB0006049	-	C06501	2238.19	2557.09	1935.77	7293.54	7214.25	7053.19	4766.96	4827.59	4856.1	-	1.29965	0.000331883	3.20321	1.67952	up
T3_positive	MW0057573	PC(22:4(7Z,10Z,13Z,16Z)/P-18:1(11Z))	GP	PC	C48H86NO7P	820.599	819.614	7.5773	[M+H]+	21.04	3	0.5434	rp	-	53479271	HMDB0008654	-	C00157	8495.76	8211.62	7403.82	4594.8	5078.78	5352.76	5383.29	5381.18	5266.37	ko00564,ko00590,ko00592,ko01100,ko01110	1.27111	0.00258103	0.62321	-0.68221	down
T3_positive	MW0011790	1-(1Z-octadecenyl)-2-(4Z,7Z,10Z,13Z,16Z,19Z-docosahexaenoyl)-sn-glycero-3-phosphocholine	GP	PC	C48H84NO7P	782.568	817.598	6.9334	[M+H-2H2O]+	23.7188	3	0.5415	rp	-	42607430	HMDB0011262	-	C00157	23309	30576.2	23503.3	4824.97	11853.2	5778.16	13050.1	12771.3	13098.3	ko00564,ko00590,ko00592,ko01100,ko01110	1.20436	0.00498166	0.290177	-1.785	down
T3_positive	MW0148736	dTDP-4-amino-2,3,4,6-tetradeoxy-D-glucose	Nucleotide and Its metabolites	Nucleotide and Its metabolites	C16H27N3O12P2	533.157	515.107	0.7807	[M+NH4]+	17.9269	3	0.5314	rp	-	46174039	-	-	C18033	59439.9	59383.7	52294.5	8893.97	15783	3012.73	27163	23287	24635	ko01100,ko01110,ko01250	1.18544	0.000905352	0.161817	-2.62757	down
T3_positive	MW0049668	1-Pentadecanoyl-3-osbondoyl-sn-glycerol	GL	DG	C40H68O5	629.503	628.507	8.347	[M+H]+	21.7598	3	0.5304	rp	-	131801729	HMDB0056002	-	C00641	23112.1	21328	20694.8	17696.7	15666.6	16302.7	17625.2	17510.4	17558.1	ko00561,ko00562,ko00564,ko01100,ko01110,ko04070	1.23285	0.00592996	0.762511	-0.391171	down
T3_positive	MW0054077	Isofucosterol 3-O-[6-O-(9,12-Octadecadienoyl)-b-D-glucopyranoside]	Hormones and hormone related compounds	Hormones and hormone related compounds	C53H88O7	837.68	836.653	6.9394	[M+H]+	23.7853	3	0.528	rp	-	131751342	HMDB0032881	-	-	138208	140960	116521	24988.7	29247.8	23673.3	43858.1	44517.8	42584.5	-	1.30529	0.00384508	0.196896	-2.34449	down
T3_positive	MW0141660	19-(4-Hydroxyphenyl)nonadecanoic acid	FA	Oxidized lipids	C25H42O3	391.329	390.313	8.035	[M+H]+	24.5754	3	0.5263	rp	-	20264499	-	-	C21448	4042.27	3196.93	2625.26	1040.39	1081.08	1185.04	2542.76	2541.76	2531.78	-	1.27519	0.0324781	0.335194	-1.57693	down
T3_positive	MW0127828	(2,6-dihydroxy-4-{7-methyl-11-oxo-4-[(3,4,5-trihydroxy-6-{[(3,4,5-trihydroxy-6-methyloxan-2-yl)oxy]methyl}oxan-2-yl)oxy]-2,8-dioxatricyclo[7.3.1.0,(1)(3)]trideca-1(12),3,5(13),6,9-pentaen-3-yl}phenoxy)dihydroxyoxo-lambdasulfanylium	Others	Others	C30H32O19S	711.139	728.126	2.7406	[M+H-H2O]+	16.3146	3	0.5262	rp	-	-	HMDB0124741	-	-	3273.63	3216.88	3457.06	8871.17	8599.02	9113.93	4854.53	4894.94	4903.84	-	1.31035	7.59704e-05	2.67242	1.41815	up
T3_positive	MW0166632	3-hydroxy-4-methyl-D-kynurenine	Aldehyde,Ketones,Esters	Esters	C11H14N2O4	256.122	238.095	2.0252	[M+NH4]+	17.65	3	0.5224	rp	-	102515514	-	-	-	5083.93	5833.66	3954.59	11985.6	10986.5	10433.8	8970.07	8983.17	8970.66	-	1.2588	0.00111318	2.2462	1.16749	up
T3_positive	MW0168389	[(2S,6S,10S,12R,13S,14S,15S,16S,17R,18R,19S,22S,23S,25R)-16,17-diacetyloxy-10,12,14,23-tetrahydroxy-6,10,19-trimethyl-13-[(2R)-2-methylbutanoyl]oxy-24-oxa-4-azaheptacyclo[12.12.0.02,11.04,9.015,25.018,23.019,25]hexacosan-22-yl] (2S,3R)-2,3-dihydroxy-2-methylbutanoate	Aldehyde,Ketones,Esters	Esters	C41H63NO15	792.41	809.42	2.6041	[M+H-H2O]+	10.7782	3	0.5194	rp	-	118701446	-	44082	C10816	245.84	441.58	425.62	7608.72	5011.73	5777.27	2571.95	2566.34	2563.54	-	1.29636	0.0168982	16.5293	4.04695	up
T3_positive	MW0136721	(-)-Maackiain-3-O-glucosyl-6''-O-malonate	Flavonoids	Flavonoid	C25H24O13	497.119	532.122	2.5514	[M+H-2H2O]+	18.034	3	0.5168	rp	-	23724669	HMDB0039246	-	-	891.66	700.04	453.37	2374.6	2788.34	2156.25	2003.15	2005.51	1992.67	-	1.24725	0.00235359	3.57894	1.83953	up
T3_positive	MW0156393	(3R,4S,5R)-5-[(3R)-3-[(3R,3aS,5aR,5bR,7aS,11aS,11bR,13aR,13bS)-5a,5b,8,8,11a,13b-hexamethyl-1,2,3,3a,4,5,6,7,7a,9,10,11,11b,12,13,13a-hexadecahydrocyclopenta[a]chrysen-3-yl]butyl]oxolane-2,3,4-triol	Terpenoids	Terpenoids	C35H60O4	527.435	544.449	7.9829	[M+H-H2O]+	21.4183	3	0.512	rp	-	10995181	-	-	C21118	80719.9	74654.5	74346.6	48708.8	41909.6	48429.8	56503.2	56181.7	56232.3	-	1.2789	0.000587981	0.605292	-0.724298	down
T3_positive	MW0055088	Momordicilin	Terpenoids	Terpenoids	C36H60O3	541.45	540.454	8.4362	[M+H]+	24.9804	3	0.5099	rp	-	102066427	HMDB0030896	-	-	26336.7	27724.9	27626	20306.8	20524.3	21588.1	22056.9	22384.9	22410.3	-	1.28946	0.000457669	0.764122	-0.388126	down
T3_positive	MW0144105	9,10-DiHOME-d4	FA	Others	C18H30D4O4	319.3	318.271	7.862	[M+H]+	18.2924	3	0.5038	rp	-	126456327	-	96456	-	224458	215498	190052	110597	129451	74572	10394.5	11393.8	8137.31	-	1.18656	0.0084241	0.499391	-1.00176	down
T3_positive	MW0156569	Sclerocitrin	Heterocyclic compounds	Heterocyclic compounds	C36H22O17	727.106	726.086	2.7449	[M+H]+	16.8731	3	0.5014	rp	-	56928143	-	-	C19978	1801.12	1811	1901.77	5120.49	4371.73	4465.34	3156.02	3168.57	3046.34	-	1.30449	0.00616974	2.53135	1.3399	up
T3_negative	MW0108634	N-Acetyl-L-aspartic acid	Amino acid and Its metabolites	Amino acid derivatives	C6H9NO5	174.041	175.048	0.7988	[M-H]-	0.425	3	0.6761	rp	997-55-7	65065	HMDB0000812	5776	C01042	43819.5	44334.5	39488.9	28642.5	26410.8	31065	29666.1	29481.3	28220.9	ko00250,ko01100	1.25419	0.00263085	0.674681	-0.567723	down
T3_negative	MW0169506	N-(furan-2-ylmethyl)-1H-pyrazolo[3,4-d]pyrimidin-4-amine	Heterocyclic compounds	Heterocyclic compounds	C10H9N5O	250.049	215.081	1.1998	[M+Cl]-	6.62874	3	0.6266	rp	99057-46-2	219840	-	96290	-	3102.72	3963.14	3865.36	2067.47	1085.46	1692.95	2187.07	2132.79	2192.06	-	1.17494	0.00684642	0.443306	-1.17362	down
T3_negative	MW0169549	Niacinamide	Alcohol and amines	Amines	C6H6N2O	121.044	122.048	1.3223	[M-H]-	9.93922	3	0.6751	rp	98-92-0	936	HMDB0001406	1497	C00153	227683	225566	196629	172859	160929	156688	169790	169779	167043	ko00760,ko01100,ko01240	1.21846	0.0190449	0.75472	-0.405987	down
T3_negative	MW0107948	Pyroglutamic acid	Amino acid and Its metabolites	Amino acid derivatives	C5H7NO3	128.035	129.043	0.7012	[M-H]-	0.124779	2	0.9902	rp	98-79-3	7405	HMDB0000267	-	C01879	337736	352520	399983	178689	188759	179334	389406	389531	393176	ko00480,ko01100	1.29682	0.0089857	0.501525	-0.995607	down
T3_negative	MW0012725	19-Oxoandrostenedione	Hormones and hormone related compounds	Hormones and hormone related compounds	C19H24O3	337.123	300.173	4.5201	[M+K-2H]-	3.65	3	0.5936	rp	968-49-0	92854	HMDB0006768	43199	C05297	874.14	588.99	949.86	3733.82	3938.71	3624.98	3008.25	3010.72	2960.41	ko01100	1.28853	4.09704e-05	4.68195	2.22711	up
T3_negative	MW0009902	Thenylchlor	Benzene and substituted derivatives	Benzene and substituted derivatives	C16H18ClNO2S	322.061	323.075	1.9568	[M-H]-	16.9709	3	0.6782	rp	96491-05-3	443036	-	-	-	56092.2	55525.5	49647.5	96861.1	95677.3	88816.5	65557.3	65761	65603.6	-	1.29307	0.000306948	1.74467	0.802956	up
T3_negative	MW0160183	2-amino-9-[(2R,4S,5R)-4-hydroxy-5-(hydroxymethyl)oxolan-2-yl]-3H-purin-6-one	Others	Others	C10H13N5O4	248.079	267.097	2.3389	[M-H2O-H]-	0.375	3	0.7516	rp	961-07-9	187790	HMDB0000085	3395	C00330	11318.9	13655.5	10517.3	19966.8	22581.3	21880.4	13365.1	13542.5	13547.6	ko00230,ko01100,ko01232,ko02010	1.26042	0.00160488	1.81531	0.860215	up
T3_negative	MEDN0747	2,4-Di-tert-butylphenol	Benzene and substituted derivatives	Phenolics	C14H22O	205.16	206.167	7.552	[M-H]-	1.4887	2	0.9823	rp	96-76-4	7311	HMDB0013816	-	-	31010.8	32805.3	38024.2	67269.3	60909.9	60036.4	31172	31393	32619.3	-	1.27964	0.000772187	1.84814	0.886077	up
T3_negative	MW0156204	Pterostilbene Phosphate	Benzene and substituted derivatives	Benzene and substituted derivatives	C16H17O6P	335.066	336.076	1.2872	[M-H]-	11.8953	3	0.8509	rp	959699-21-9	-	-	263501	-	12571.3	19912.6	14580.3	27805.8	37733.7	33292.9	26590.9	26849.7	26696.6	-	1.20338	0.0103706	2.09995	1.07035	up
T3_negative	MEDP0403	Deoxycytidine	Nucleotide and Its metabolites	Nucleotide and Its metabolites	C9H13N3O4	272.089	227.091	0.7694	[M+HCOO]-	4.98076	3	0.7826	rp	951-77-9	13711	HMDB0000014	3367	C00881	136636	158750	125450	243529	245326	230140	169379	167168	168554	ko00240,ko01100,ko01232,ko02010	1.2677	0.00315382	1.70849	0.772723	up
T3_negative	MW0157403	Simplexin, 22,23,24,25-tetradehydro-	Terpenoids	Ditepenoids	C30H40O8	527.258	528.272	8.9463	[M-H]-	12.8752	3	0.6818	rp	92219-48-2 | 52306-12-4	5477859	-	-	-	2727.49	660.38	2351.75	43377.2	60437.9	41564.6	28494.6	25868.2	28323.5	-	1.26451	0.0154489	25.3292	4.66273	up
T3_negative	MW0005838	6-Phosphogluconic acid	Organic acid and Its derivatives	Organic acid and Its derivatives	C6H13O10P	551.033	276.025	0.598	[2M-H]-	18.7716	3	0.6484	rp	921-62-0	91493	HMDB0001316	367	C00345	2.86013e+06	2.73543e+06	2.78118e+06	3.85732e+06	3.97063e+06	3.92798e+06	3.36721e+06	3.35378e+06	3.36993e+06	ko00030,ko01100,ko01110,ko01200	1.30621	2.32359e-05	1.4034	0.488926	up
T3_negative	MW0114332	D-Myo-inositol-2,4,5-triphosphate	Organic acid and Its derivatives	Organic acid and Its derivatives	C6H15O15P3	478.984	419.962	8.9759	[M+CH3COO]-	15.3456	3	0.6459	rp	91840-07-2	122195	-	45087	-	157604	183061	170134	151183	129616	144066	177668	170894	174949	-	1.08081	0.043066	0.831764	-0.265753	down
T3_negative	MW0015216	7-Ketodeoxycholic acid	Bile acids	Bile acids	C24H38O5	405.264	406.272	6.313	[M-H]-	4.21225	2	0.9279	rp	911-40-0	188292	HMDB0000391	5380	-	3194.79	3473.77	2040.39	1510.55	1413.77	915.73	3147.44	2936.67	3076.28	-	1.14677	0.0498184	0.440931	-1.18137	down
T3_negative	MEDL01985	Goshonoside F4	Terpenoids	Ditepenoids	C32H54O12	629.352	630.361	4.1228	[M-H]-	5.18535	3	0.5453	rp	90851-27-7	131752350	HMDB0038377	-	-	570.68	219.53	478.46	3587.23	3880.06	3042.79	1661.82	1604.98	1667.86	-	1.2643	0.00221008	8.28433	3.05038	up
T3_negative	MW0158329	Polytuftsin	Amino acid and Its metabolites	Small Peptide	C21H40N8O6	559.309	500.307	2.2214	[M+CH3COO]-	21.9727	3	0.6792	rp	9063-57-4 | 112592-90-2	156080	HMDB0005770	-	-	3719.37	6774.2	1521.9	14960.2	9460.36	9422.65	5146.11	5199.32	5186.37	-	1.03667	0.0399047	2.81664	1.49397	up
T3_negative	MW0159735	Triton X-100	Benzene and substituted derivatives	Benzene and substituted derivatives	C16H26O2	361.309	250.193	6.2276	[M-H]-	6.09967	3	0.6489	rp	9002-93-1	5590	HMDB38380	-	C11623	31783.3	35968.3	26754.6	22970.4	22161.5	18628.6	22653.2	22820.5	22761.7	-	1.15024	0.0424439	0.674671	-0.567745	down
T3_negative	MEDN0362	LPE(18:1/0:0)	GP	LPE	C23H46NO7P	478.284	479.301	6.9625	[M-H]-	5.21173	1b	0.8296	rp	89576-29-4	53480949	HMDB0011506	-	C04438	39390.3	43769.7	47323.5	291059	151050	236238	96902.6	95559	95625.4	ko00564	1.27569	0.0459184	5.19871	2.37815	up
T3_negative	MW0126398	Quinolinic acid	Organic acid and Its derivatives	Organic acid and Its derivatives	C7H5NO4	201.997	167.022	1.3744	[M+Cl]-	14.1	3	0.7758	rp	89-00-9	1066	HMDB0000232	-	C03722	35862	38091.1	37883.6	58022.9	63460.5	77606.7	52805.2	53594.3	53779.8	ko00380,ko00410,ko00760,ko01100,ko01240	1.25381	0.0363052	1.78018	0.832027	up
T3_negative	MW0122639	8H-Purin-8-one, 2-amino-1,6,7,9-tetrahydro-6-thioxo-	Heterocyclic compounds	Heterocyclic compounds	C5H5N5OS	219.978	183.022	1.7845	[M+K-2H]-	19.05	3	0.7077	rp	88550-56-5	10442362	HMDB0060804	-	-	202429	198583	93776	314312	254851	331533	287770	298601	295790	-	1.0179	0.0412687	1.82037	0.864229	up
T3_negative	MW0006160	F-amidine	Benzene and substituted derivatives	Benzene and substituted derivatives	C14H19FN4O2	275.125	294.149	0.7012	[M-H2O-H]-	15.8138	3	0.6437	rp	877617-45-3	11589584	-	96435	-	1.32762e+06	1.55506e+06	1.26232e+06	682320	634533	811390	1.17427e+06	1.18238e+06	1.19295e+06	-	1.25941	0.0056789	0.513449	-0.961708	down
T3_negative	MW0154667	O-2545(hydrochloride)	Benzene and substituted derivatives	Benzene and substituted derivatives	C26H37ClN2O2	443.251	444.254	4.3039	[M+Cl]-	6.77124	3	0.8272	rp	874745-43-4	24848973	-	45171	-	30948	45121.7	40966.3	314637	214570	222355	118061	115124	115451	-	1.29235	0.0208249	6.42163	2.68294	up
T3_negative	FDATN01006	Sodium pantothenate	Others	Medicine	C9H16NNaO5	218.104	241.093	2.2567	[M-H]-	1.05958	2	0.9573	rp	867-81-2	23679004	-	-	-	56492	61514.2	50637.2	130992	117526	126201	72082.1	71840.1	72042.5	-	1.29602	0.00022538	2.22196	1.15184	up
T3_negative	MW0103590	Guanosine-5'-monophosphate	Nucleotide and Its metabolites	Nucleotide and Its metabolites	C10H14N5O8P	725.109	363.058	1.1486	[2M-H]-	0.827462	2	0.9503	rp	85-32-5 | 128952-18-1 | 29593-02-0	135398631	HMDB0001397	-	C00144	33335	36171.9	24116.8	10077.6	8334.38	8287.61	16321.8	15943.4	16303.4	ko00230,ko01100,ko01232	1.27978	0.0231991	0.28518	-1.81006	down
T3_negative	MW0009283	Enobosarm	Benzene and substituted derivatives	Benzene and substituted derivatives	C19H14F3N3O3	448.106	389.099	2.4335	[M+CH3COO]-	18.9506	3	0.6596	rp	841205-47-8	11326715	-	-	-	35235	32902.4	32561	24571.6	22529.6	21799.5	29028.2	29145.7	28956	-	1.27847	0.000852929	0.68423	-0.547448	down
T3_negative	MW0000420	Ranitidine	Heterocyclic compounds	Heterocyclic compounds	C13H22N4O3S	359.145	314.141	2.0452	[M+HCOO]-	17.0845	3	0.6159	rp	82530-72-1	3001055	HMDB0001930	-	-	12536.8	13636	10904.7	4643.2	4587.94	4857.52	6435.73	6383.48	6456.11	-	1.29924	0.00994654	0.379979	-1.39601	down
T3_negative	MEDN1780	Pseudolaric acid B	Organic acid and Its derivatives	Organic acid and Its derivatives	C23H28O8	431.168	432.178	1.9217	[M-H]-	9.33196	1b	0.7307	rp	82508-31-4	71307573	-	-	-	6154.65	7878.92	6643.68	61586.8	56012.8	47328	16905.2	17007.6	17007.1	-	1.30523	0.00669795	7.97628	2.99572	up
T3_negative	MEDN1156	FFA(20:4)	FA	Oxidized lipids	C20H32O2	363.251	304.24	8.9584	[M+CH3COO]-	3.78043	3	0.5957	rp	82073-91-4	1899	-	24087	-	6778.74	5806.43	9084.59	127107	238523	132551	90604.2	87036.3	91026.2	-	1.2952	0.0482845	22.9897	4.52292	up
T3_negative	MW0149467	Ganoderic acid A	Organic acid and Its derivatives	Organic acid and Its derivatives	C30H44O7	551.266	516.309	6.2706	[M+Cl]-	23.0098	3	0.6638	rp	81907-62-2	471002	HMDB0034931	-	-	4502.15	6862.94	4974.58	3314.73	2346.01	852.39	6052.97	6120.55	5695.45	-	1.01832	0.0322003	0.398608	-1.32696	down
T3_negative	MW0148445	Dichlorophenyl-bis-triazolylpropanol	Benzene and substituted derivatives	Benzene and substituted derivatives	C13H12Cl2N6O	397.068	338.045	1.6527	[M+CH3COO]-	22.1614	3	0.5026	rp	81886-52-4	133777	-	-	-	31.5	129.15	409.56	14992.1	14583	13721.9	6139.78	6137.63	6177.92	-	1.25358	0.000263748	75.9317	6.24663	up
T3_negative	MW0108296	Methyl dihydrogen phosphate	Aldehyde,Ketones,Esters	Esters	CH5O4P	110.985	111.993	1.1314	[M-H]-	2.88828	3	0.8372	rp	812-00-0	13130	HMDB0061711	-	-	6044.53	2411.47	7813.11	18201.3	18188.2	19193.7	15980.7	15900	15750.6	-	1.15805	0.0116881	3.41649	1.77251	up
T3_negative	MW0017091	Cholic acid	Bile acids	Bile acids	C24H40O5	407.279	408.288	6.2791	[M-H]-	3.07104	2	0.985	rp	81-25-4	221493	HMDB0000619	206	C00695	8217.25	9583.04	9195.23	6474.2	6550.42	5626.33	8950.26	8877.24	8638.24	ko01100	1.23475	0.00676098	0.690891	-0.533471	down
T3_negative	MW0107123	Roxadustat	Benzene and substituted derivatives	Benzene and substituted derivatives	C19H16N2O5	351.097	352.106	4.4677	[M-H]-	5.68992	3	0.8532	rp	808118-40-3	11256664	-	-	-	60253.1	58649.5	54130.9	45939.8	50003.4	51902.1	44434.7	43589.7	43704.2	-	1.11955	0.0298583	0.854432	-0.226963	down
T3_negative	MW0153221	Lys-Gln-Ala-Gly-Asp-Val	Amino acid and Its metabolites	Small Peptide	C25H44N8O10	615.299	616.318	3.8309	[M-H]-	19.4404	3	0.7302	rp	80755-87-9	4615194	-	85172	-	196.07	1284.57	304.85	5281.13	4167.82	4569.3	2037.96	2012.03	2083.83	-	1.18425	0.00102989	7.85121	2.97291	up
T3_negative	MW0114186	Deoxycytidine diphosphate	Nucleotide and Its metabolites	Nucleotide and Its metabolites	C9H15N3O10P2	386.017	387.023	0.8327	[M-H]-	1.325	3	0.7211	rp	800-73-7	150855	HMDB0001245	6105	C00705	20548.2	24622.9	24541.1	64367.2	60247.4	40968.6	18828.5	18312.2	18788	ko00240,ko01100,ko01232	1.23355	0.0432468	2.37524	1.24807	up
T3_negative	MW0108792	N-Gluconyl ethanolamine phosphate	Organic acid and Its derivatives	Organic acid and Its derivatives	C8H18NO10P	364.066	319.067	1.8999	[M+HCOO]-	3.5617	3	0.709	rp	791807-20-0	71587802	HMDB0032294	-	-	1202.28	3280.84	2789.23	9299.9	8931.61	7821.97	3998.18	4109.22	4017.47	-	1.19001	0.00190788	3.58254	1.84098	up
T3_negative	MW0114480	Fructose-2,6-diphosphate	Organic acid and Its derivatives	Organic acid and Its derivatives	C6H14O12P2	380.012	339.996	1.2264	[M-H+CH3CN]-	5.925	3	0.6566	rp	79082-92-1	105021	HMDB0001047	5964	C00665	20290.4	19919.5	11585.8	1346.28	482.2	1353.55	13368.4	13476.4	12903.5	ko00051,ko01100	1.26373	0.0283429	0.0614342	-4.02482	down
T3_negative	MW0107551	Isobutyric acid	Organic acid and Its derivatives	Organic acid and Its derivatives	C4H8O2	147.066	88.0524	1.4514	[M+CH3COO]-	1.00305	3	0.6834	rp	79-31-2	6590	HMDB0001873	106	C02632	51260.9	53327.4	43161.8	22852.8	19485.8	21783.9	28924.7	29021.5	28922.7	ko01100	1.2873	0.00740742	0.433993	-1.20426	down
T3_negative	MW0106168	Citric acid	Organic acid and Its derivatives	Organic acid and Its derivatives	C6H8O7	191.02	192.027	1.1486	[M-H]-	0.490286	2	0.9661	rp	77-92-9	311	HMDB0000094	124	C00158	766352	798420	509232	1.61159e+06	1.37026e+06	1.5139e+06	1.18633e+06	1.19461e+06	1.19298e+06	ko00020,ko00250,ko00630,ko01100,ko01110,ko01200,ko01210,ko01230,ko01240	1.22664	0.00278655	2.16767	1.11614	up
T3_negative	MEDP0637	Phe-Pro	Amino acid and Its metabolites	Amino acids	C14H18N2O3	261.127	262.132	2.3725	[M-H]-	10.3089	1b	0.7524	rp	7669-65-0	7020642	HMDB0011177	-	-	210.33	162.56	263.92	4593.58	3765.74	4205.09	1763.75	1737.09	1741.65	-	1.30584	0.00321062	19.7302	4.30234	up
T3_negative	MW0015446	9E-heptadecenoic acid	FA	Oxidized lipids	C17H32O2	267.233	268.24	8.4169	[M-H]-	2.01423	3	0.8584	rp	76261-97-7	5312440	HMDB0031046	-	C16536	1961.14	2592.47	2799.67	15045.7	23507.1	14773.6	9580.3	10195.6	10314.8	-	1.28765	0.0324169	7.25207	2.85839	up
T3_negative	MW0143301	N-Methyl-4-dimethylallyltryptophan	Heterocyclic compounds	Heterocyclic compounds	C17H22N2O2	267.146	286.168	8.3124	[M-H2O-H]-	10.825	3	0.7535	rp	75917-16-7	68294649	-	-	C20410	9955.56	13249	11934.3	23467.7	20834.2	29864.9	11160.9	11153.3	11006.5	ko01100,ko01110	1.23508	0.0288284	2.11068	1.07771	up
T3_negative	MW0168016	GDP-D-mannose	Others	Others	C16H25N5O16P2	586.047	605.077	1.0445	[M-H2O-H]-	21.7555	3	0.5399	rp	755712-80-2	135525167	-	-	-	3109.42	3657.73	1365.18	11241.9	5718.26	9612.73	4487.76	4324.06	4424.95	-	1.12886	0.0481683	3.26756	1.70821	up
T3_negative	MEDN0212	Threitol	Carbohydrates and Its metabolites	Sugar alcohols	C4H10O4	157.036	122.058	0.5087	[M+Cl]-	19.2656	3	0.6041	rp	7541-59-5	169019	HMDB0004136	-	-	1647.46	1567.68	1289.18	4139.2	3819.37	5392.44	2690.55	2742.02	2733.91	-	1.27774	0.021138	2.96405	1.56757	up
T3_negative	MEDL01795	6-(Methylsulfonyl)hexyl glucosinolate	Others	Glucosinolates	C14H27NO11S3	480.069	481.075	2.2744	[M-H]-	1.20996	3	0.7582	rp	74542-18-0	131752359	HMDB0038411	-	-	11536.1	12305.2	10444.8	34158.1	33053.6	33783.2	19670.2	19653	19416.2	-	1.30698	2.40679e-05	2.94565	1.55858	up
T3_negative	MW0108927	N-Tris(hydroxymethyl)methyl-2-aminoethanesulfonic acid	Organic acid and Its derivatives	Organic acid and Its derivatives	C6H15NO6S	457.119	229.062	0.9497	[2M-H]-	12.2727	3	0.7185	rp	7365-44-8	81831	-	-	C05353	9978.16	13358.4	1643.92	187822	162100	127649	23756.1	23792	24222.7	-	1.21488	0.0107387	19.1178	4.25684	up
T3_negative	MW0136756	6''-O-Acetylgenistin	Heterocyclic compounds	Heterocyclic compounds	C23H22O11	473.11	474.116	0.5637	[M-H]-	2.2748	3	0.637	rp	73566-30-0	5315831	-	-	-	402743	409016	347344	243051	216713	219864	240916	242292	241062	-	1.27559	0.00700711	0.586339	-0.770194	down
T3_negative	MW0015393	alpha-Dimorphecolic acid	FA	Oxidized lipids	C18H32O3	295.228	296.235	7.9021	[M-H]-	0.898823	3	0.7682	rp	73543-67-6	5312830	HMDB0004670	-	C14767	7006.46	4653.68	5160.36	12224.5	8020.89	10759.3	1852.61	1899.57	1847.61	-	1.14233	0.0407997	1.84327	0.882264	up
T3_negative	MW0142361	Microthecin	Aldehyde,Ketones,Esters	Ketones	C6H8O4	179.014	144.042	1.5515	[M+Cl]-	6.35	3	0.6465	rp	73033-01-9	10130020	-	-	C19821	38796.7	41784.8	42672.9	58265.1	55337.5	58292.1	43968.7	44401.3	47578.8	-	1.28715	0.000524495	1.39463	0.479886	up
T3_negative	MW0105438	Adenine	Nucleotide and Its metabolites	Nucleotide and Its metabolites	C5H5N5	134.047	135.054	1.904	[M-H]-	1.34443	2	0.904	rp	73-24-5	190	HMDB0000034	85	C00147	40931.8	45589.3	44703	149048	148661	135285	74343.4	74020.2	74349.9	ko00230,ko01100,ko01110,ko01232	1.308	0.000879148	3.29965	1.72231	up
T3_negative	MW0193946	L-Tryptophan	Amino acid and Its metabolites	Amino acids	C11H12N2O2	203.083	204.09	2.461	[M-H]-	0.275833	2	0.9715	rp	73-22-3	6305	HMDB0000929	5879	C00078	114224	132849	117078	496997	444841	471362	240697	240481	240465	ko00260,ko00380,ko00400,ko00970,ko00999,ko01100,ko01110,ko01210,ko01230,ko01240	1.30796	0.000546438	3.8808	1.95635	up
T3_negative	MW0123524	Dehydro-L-(+)-ascorbic acid dimer	Organic acid and Its derivatives	Organic acid and Its derivatives	C12H12O12	407.038	348.033	1.9568	[M+CH3COO]-	22.7801	3	0.6162	rp	72691-25-9	4613280	-	45119	-	8050.09	7943.16	8601.71	11824.1	11582.5	13464.2	9557.64	9638.16	9727.22	-	1.26995	0.0128589	1.49912	0.584119	up
T3_negative	MW0147097	Carboxy phosphate	Organic acid and Its derivatives	Organic acid and Its derivatives	CH3O6P	176.936	141.967	1.1061	[M+Cl]-	0.0323635	3	0.8261	rp	7244-85-1	195870	-	-	C20969	177073	150106	155999	59343.4	54245.7	57246.7	125132	129566	129880	-	1.30395	0.00495763	0.353567	-1.49994	down
T3_negative	MW0114742	Linustatin	Carbohydrates and Its metabolites	Carbohydrates and Its metabolites	C16H27NO11	390.134	409.158	2.4457	[M-H2O-H]-	17.525	3	0.6335	rp	72229-40-4	119301	-	66912	C08333	52853.7	62260.3	54470.7	153096	114748	113940	53890.4	53192.4	53907.6	-	1.26727	0.0269625	2.25129	1.17075	up
T3_negative	MW0013395	1-hexadecanoyl-2-(5Z,8Z,11Z,14Z-eicosatetraenoyl)-sn-glycero-3-phosphoethanolamine	GP	PE	C41H74NO8P	738.509	739.515	7.0566	[M-H]-	1.29832	3	0.6338	rp	70812-59-8	9546800	HMDB0008937	-	C00350	10209.8	9729.79	7064.93	5469.87	2462.09	2650.52	7185.99	7926.92	4908.71	ko00563,ko00564,ko01100,ko01110,ko04136,ko04138	1.14029	0.0165647	0.391879	-1.35152	down
T3_negative	MW0138906	Maysin	Heterocyclic compounds	Heterocyclic compounds	C27H28O14	575.14	576.148	3.023	[M-H]-	4.13947	3	0.701	rp	70255-49-1	194340	HMDB0037419	-	-	161.11	125.39	273.74	5551.16	4851.96	5228.02	3462.17	3180.05	3216.32	-	1.30001	0.00103664	27.9008	4.80223	up
T3_negative	MW0103416	6-Methylthiopurine 5'-monophosphate ribonucleotide	Nucleotide and Its metabolites	Nucleotide and Its metabolites	C11H15N4O7PS	397.036	378.04	1.3625	[M+F]-	7.525	2	0.9129	rp	7021-52-5	10091038	HMDB0060414	-	C16615	3568.35	5004.18	3145.86	14082	14569.7	13628.9	6764.62	6764.27	6682.54	-	1.28253	0.000624149	3.60806	1.85122	up
T3_negative	MW0012919	LPE(18:0/0:0)	GP	LPE	C23H48NO7P	478.294	481.317	7.3307	[M-H]-	1.47714	2	0.9453	rp	69747-55-3	9547068	HMDB0011130	-	C00157	269734	247823	312786	1.84196e+06	1.0986e+06	1.59799e+06	680201	678085	670318	ko00564,ko00590,ko00592,ko01100,ko01110	1.28829	0.0291341	5.46589	2.45046	up
T3_negative	MW0103535	2',3'-Dideoxyinosine	Nucleotide and Its metabolites	Nucleotide and Its metabolites	C10H12N4O3	295.112	236.091	2.9102	[M+CH3COO]-	20.2733	3	0.6889	rp	69655-05-6	135398739	HMDB0015037	-	C06953	339.78	578.62	123.28	2723.11	2738.58	2565.74	1102.24	1106.38	1136.63	-	1.21456	0.000918967	7.70623	2.94603	up
T3_negative	MW0157921	Thymopentin	Amino acid and Its metabolites	Small Peptide	C30H49N9O9	660.35	679.365	6.9967	[M-H2O-H]-	1.67606	3	0.7276	rp	69558-55-0	451417	-	-	-	6842.24	7485.48	7616.24	3825.49	3997.64	2391.51	8039.97	7962.64	7697.39	-	1.20935	0.00726396	0.465488	-1.10319	down
T3_negative	MW0062278	Prostaglandin K1	Hormones and hormone related compounds	Hormones and hormone related compounds	C20H32O5	351.217	352.225	8.2213	[M-H]-	1.28783	2	0.8885	rp	69413-73-6	16061102	-	36217	-	4188.82	1970.28	2458.9	12944.5	18144.2	13267.4	7950.53	8002.67	8013.82	-	1.25669	0.0106856	5.14691	2.36371	up
T3_negative	MW0114304	Maltose	Carbohydrates and Its metabolites	Sugars	C12H22O11	377.086	342.116	0.8124	[M+Cl]-	2.25663	2	0.9469	rp	69-79-4	10991489	HMDB0000163	413	C00208	1.57431e+07	1.84371e+07	1.57729e+07	2.90982e+07	2.64783e+07	2.83051e+07	1.32997e+07	1.33615e+07	1.32148e+07	ko00500,ko01100,ko01110,ko02010	1.28022	0.000734227	1.67921	0.747779	up
T3_negative	MW0134082	Naringenin	Flavonoids	Flavonoid	C15H12O5	253.05	272.068	4.8035	[M-H2O-H]-	0.175	3	0.5907	rp	67604-48-2	932	HMDB0002670	-	C00509	326.82	487.33	201.85	2116.51	2455.66	1912.28	827.75	782.06	831.52	ko01100,ko01110	1.26368	0.00197243	6.38233	2.67408	up
T3_negative	FDATN01519	D-phenylalanine	Amino acid and Its metabolites	Amino acids	C9H11NO2	164.072	165.079	1.9568	[M-H]-	0.32405	2	0.9712	rp	673-06-3	71567	-	-	C02265	211797	223139	191594	537656	501223	481964	279878	280812	280500	ko00360,ko00470,ko01100	1.3023	0.00040372	2.42741	1.27942	up
T3_negative	MW0114676	Ketorolac	Heterocyclic compounds	Heterocyclic compounds	C15H13NO3	290.067	255.089	4.4677	[M+Cl]-	19.8383	3	0.5165	rp	66635-83-4	3826	HMDB0014608	-	C07062	15604.6	14480.3	14419.9	10899.1	12309	11827	13002.8	12786.8	13060.6	-	1.23397	0.00512151	0.78722	-0.345161	down
T3_negative	MW0002871	2-Chloro-4-methylphenol	Benzene and substituted derivatives	Phenolics	C7H7ClO	283.029	142.018	0.5637	[2M-H]-	2.36358	3	0.7534	rp	6640-27-3	14851	-	-	-	317352	286326	234131	710804	551052	609974	385518	383064	385583	-	1.26243	0.00714763	2.2342	1.15976	up
T3_negative	MW0017223	Citrusin D	Benzene and substituted derivatives	Benzene and substituted derivatives	C16H22O8	401.13	342.132	2.8396	[M+CH3COO]-	8.82702	3	0.807	rp	65995-51-9	131752609	HMDB0039334	-	-	20399.8	18967.4	19476.9	54313.1	56833.8	53222.5	36768.4	42873.7	43569.3	-	1.30968	0.00021258	2.79331	1.48197	up
T3_negative	MW0114496	galactopinitol A	Carbohydrates and Its metabolites	Sugar alcohols	C13H24O11	355.124	356.132	1.205	[M-H]-	1.4	3	0.5058	rp	64290-91-1	25201084	HMDB0039475	-	-	12208.6	12930.1	35917.6	111430	128954	107503	65182.8	64887.1	65830.2	-	1.22616	0.000819887	5.69781	2.51041	up
T3_negative	MW0003586	3,4,5-Trimethoxyphenol	Benzene and substituted derivatives	Phenolics	C9H12O4	219.046	184.074	0.7524	[M+Cl]-	7.50673	3	0.7458	rp	642-71-7	69505	-	68560	-	1.00636e+06	704996	490909	1.51025e+06	1.41108e+06	1.41535e+06	547410	555508	555093	-	1.13562	0.0363529	1.96919	0.977601	up
T3_negative	MEDP0129	Phenethylamine	Alcohol and amines	Amines	C8H11N	120.076	121.089	2.4297	[M-H]-	16.0554	3	0.7435	rp	64-04-0	1001	HMDB0012275	-	C05332	5455.32	4593.9	4724.84	3892.06	3360.77	3671.66	3666.09	3664.56	3627.22	ko00360,ko01100	1.19244	0.0224997	0.739437	-0.4355	down
T3_negative	MW0106767	gamma-Glutamylcysteine	Amino acid and Its metabolites	Small Peptide	C8H14N2O5S	249.055	250.062	0.7694	[M-H]-	0.35	2	0.9105	rp	636-58-8	123938	HMDB0001049	5966	C00669	3153.87	1652.75	1242.86	9770.91	10735.3	11141.2	5519.32	5462.9	5492.42	ko00480,ko01100,ko01240	1.249	0.000504768	5.23143	2.38721	up
T3_negative	MW0108240	Methoxyacetic acid	Organic acid and Its derivatives	Organic acid and Its derivatives	C3H6O3	89.0245	90.0317	0.8552	[M-H]-	0.579733	3	0.658	rp	625-45-6	12251	HMDB0041929	-	-	54705.5	64783.8	55185	124696	130251	140908	64912	65000.3	65156.5	-	1.29565	0.000428945	2.26625	1.18031	up
T3_negative	MW0142104	2,6-Dichloroindophenol sodium salt	Benzene and substituted derivatives	Benzene and substituted derivatives	C12H6Cl2NNaO2	287.957	288.967	1.3652	[M-H]-	11.3786	3	0.7422	rp	620-45-1	23697355	-	-	C03822	4461.74	5039.83	4257.04	11702.5	12489	12686.6	7723.1	7696.46	7667.95	-	1.30349	5.46594e-05	2.68036	1.42243	up
T3_negative	MW0049069	Cucurbitacin B	Aldehyde,Ketones,Esters	Esters	C32H46O8	557.321	558.319	7.412	[M-H]-	16.2	3	0.5187	rp	6199-67-3	5281316	HMDB0034927	41667	C08794	20935.6	14634.3	31450	40813.3	53672.4	45595.9	35744.2	35272.1	35295.9	ko01110	1.12224	0.0192024	2.09015	1.06361	up
T3_negative	MW0106148	Chorismic acid	Organic acid and Its derivatives	Organic acid and Its derivatives	C10H10O6	285.051	226.048	1.6575	[M+CH3COO]-	24.848	3	0.5128	rp	617-12-9	12039	HMDB0012199	-	C00251	14964.7	15205.5	14235.7	50193.4	51368.4	48777.3	25854.3	25538	25454.1	ko00130,ko00400,ko00790,ko00999,ko01100,ko01110,ko01230,ko01240	1.3108	8.53452e-05	3.38557	1.7594	up
T3_negative	MW0132809	3,7-Di-O-methylquercetin	Flavonoids	Flavonols	C17H14O7	329.066	330.074	5.4422	[M-H]-	0.38208	3	0.7936	rp	61395	5280417	HMDB0029263	-	C01265	364.64	868.68	846.47	5405.07	6147.14	5525.92	3266.39	3304.52	3303.13	ko01110	1.2681	0.000119801	8.21147	3.03764	up
T3_negative	MW0013396	PE(18:0/20:4(5Z,8Z,11Z,14Z))	GP	PE	C43H78NO8P	766.54	767.547	7.2209	[M-H]-	0.456277	3	0.7562	rp	61216-62-4	5289133	HMDB0009003	-	C00350	10922.7	7999.9	8446.74	2720.17	1600.12	1056.41	8646	9462.65	5219.22	ko00563,ko00564,ko01100,ko01110,ko04136,ko04138	1.24071	0.00531892	0.19645	-2.34777	down
T3_negative	MADN0586	2-methyl citric acid	Organic acid and Its derivatives	Organic acid and Its derivatives	C7H10O7	205.036	206.043	1.2345	[M-H]-	1.24143	1b	0.7579	rp	6061-96-7	90470055	HMDB00379	5368	-	14761.3	15610	11992.4	618587	521027	536284	293226	292383	293048	-	1.3105	0.00305023	39.5597	5.30596	up
T3_negative	MW0106155	cis-2-Methylaconitate	Organic acid and Its derivatives	Organic acid and Its derivatives	C7H8O6	187.025	188.032	1.9568	[M-H]-	0.525	2	0.961	rp	6061-93-4	3080625	HMDB0006357	-	C04225	129.69	127.18	42.68	5436.63	3966.22	4459.01	999.6	978.06	1032.34	ko00640,ko01100	1.28887	0.0087849	46.2756	5.53218	up
T3_negative	MW0107877	Homocysteine	Amino acid and Its metabolites	Amino acids	C4H9NO2S	269.07	135.035	0.7841	[2M-H]-	15.0462	3	0.7517	rp	6027-13-0	91552	HMDB0000742	3256	C00155	42006.1	45738.2	46512.5	83975.4	75389.7	99688.6	47970.7	47915.6	47128.7	ko00270,ko00920,ko01100,ko01110,ko01230	1.26922	0.0244859	1.92954	0.948256	up
T3_negative	MW0017202	Citramalic acid	Organic acid and Its derivatives	Organic acid and Its derivatives	C5H8O5	129.019	148.037	1.1486	[M-H2O-H]-	0.075	2	0.9226	rp	597-44-4	1081	HMDB0000426	5415	C00815	19458.7	18798.8	15214.6	32152.5	24376.1	31160.5	23598.2	23729.7	23602.8	-	1.1894	0.0249299	1.63991	0.713613	up
T3_negative	MW0014489	4-Hydroxybutyric acid	Organic acid and Its derivatives	Organic acid and Its derivatives	C4H8O3	144.066	104.047	1.5819	[M-H+CH3CN]-	1.1	2	0.9176	rp	591-81-1	10413	HMDB0000710	5678	C01991	2723.62	3608.75	1755.82	6299.37	5613.86	4212.11	3124.87	3127.92	3065.13	-	1.08855	0.0310971	1.99369	0.995441	up
T3_negative	MEDP1055	DL-Glyceraldehyde 3-Phosphate	Carbohydrates and Its metabolites	Sugar derivatives	C3H7O6P	168.99	169.998	1.114	[M-H]-	0.432973	2	0.9598	rp	591-59-3	729	HMDB0001112	149	C00661	18461.1	14645.9	15834.7	4721.54	3551.53	1453.56	9605.96	9665.54	9940.77	-	1.21068	0.0010163	0.198739	-2.33105	down
T3_negative	MW0153753	MET-enkephalin	Amino acid and Its metabolites	Small Peptide	C27H35N5O7S	572.232	573.226	1.3744	[M-H]-	18.1604	3	0.8048	rp	58569-55-4	443363	-	-	C75740	985.97	46.75	103.93	21136.9	17788.5	16929.5	6655.89	6649.13	6763.54	-	1.22275	0.00335628	49.14	5.61882	up
T3_negative	MEDN0691	Maltitol	Carbohydrates and Its metabolites	Sugar alcohols	C12H24O11	343.129	344.132	2.3712	[M-H]-	1.02548	3	0.604	rp	585-88-6	493591	HMDB0002928	3484	-	160.05	17.73	182.41	1960.01	1072.04	1396.92	293.67	275.58	293.02	-	1.15616	0.0306425	12.2962	3.62014	up
T3_negative	MW0105941	Asp-Asp	Amino acid and Its metabolites	Small Peptide	C8H12N2O7	229.051	248.065	5.2116	[M-H2O-H]-	11.7459	3	0.7215	rp	58471-53-7	471583	-	65058	-	2730.2	2833.69	2110.44	1797.79	1852.61	1412.48	2999.66	2888	3000.45	-	1.1225	0.0399221	0.659716	-0.600083	down
T3_negative	MW0145968	L-Asparaginyl-L-asparagine	Amino acid and Its metabolites	Small Peptide	C8H14N4O5	353.075	246.096	1.1486	[M-H]-	2.07987	3	0.8328	rp	58471-52-6	16122514	HMDB0028726	-	-	11630	18428.7	11654.6	27966	24994.4	30029.3	17297.2	17521	17528.8	-	1.19451	0.010446	1.98953	0.992427	up
T3_negative	MW0103706	Uridine-5'-diphosphate	Nucleotide and Its metabolites	Nucleotide and Its metabolites	C9H14N2O12P2	402.994	404.002	1.3122	[M-H]-	3.29592	2	0.914	rp	58-98-0	6031	HMDB0000295	-	C00015	44087.5	38926.1	31740	18857.4	16523.3	18178.1	82500.8	82368.7	81916.9	ko00240,ko01100,ko01232,ko01240	1.26432	0.0258891	0.466728	-1.09934	down
T3_negative	MW0103709	Uridine-5'-monophosphate	Nucleotide and Its metabolites	Nucleotide and Its metabolites	C9H13N2O9P	323.029	324.036	1.1486	[M-H]-	0.780367	2	0.9511	rp	58-97-9	6030	HMDB0000288	-	C00105	1.06905e+06	1.27359e+06	904967	1.61509e+06	1.66939e+06	1.58653e+06	1.26466e+06	1.2599e+06	1.26459e+06	ko00240,ko01100,ko01232,ko01240	1.18174	0.0314237	1.49988	0.584843	up
T3_negative	MEDP0143	Biotin	CoEnzyme and vitamins	CoEnzyme and vitamins	C10H16N2O3S	263.082	244.088	4.0963	[M+F]-	11.4	1b	0.5642	rp	58-85-5	171548	HMDB0000030	243	C00120	457.06	197.6	1617.15	20467.7	22352.5	18437.6	9677.17	9516.76	9591.04	ko00780,ko01100,ko01240,ko02010	1.2437	0.00113896	26.9643	4.75298	up
T3_negative	MW0159913	Inosine	Nucleotide and Its metabolites	Nucleotide and Its metabolites	C10H12N4O5	267.074	268.081	1.4678	[M-H]-	0.0776075	2	0.9512	rp	58-63-9	135398641	HMDB0000195	-	C00294	4221.35	5086.65	4656.89	40621.6	37704.8	37243.7	17072.7	17079.6	16888.9	ko00230,ko01100,ko01232,ko02010	1.31008	0.000557044	8.27576	3.04889	up
T3_negative	MW0063676	Stevioside	Terpenoids	Ditepenoids	C38H60O18	803.381	804.378	3.2468	[M-H]-	16.4792	3	0.5989	rp	57817-89-7	442089	HMDB0034945	-	C09189	153.09	127.68	170.44	5013	2893.27	3078.35	1235.6	1344.48	1343.99	ko01110	1.30318	0.0352693	24.3448	4.60554	up
T3_negative	MW0146731	Biocytin	CoEnzyme and vitamins	CoEnzyme and vitamins	C16H28N4O4S	393.162	372.183	3.2291	[M+Na-2H]-	9.675	3	0.7758	rp	576-19-2	83814	HMDB0003134	-	C05552	118.24	119.25	24.12	2029.43	1586.24	1738.21	458.12	520.88	517.12	ko00780,ko01100	1.24578	0.00397775	20.4651	4.3551	up
T3_negative	MEDL02396	Sucrose	Carbohydrates and Its metabolites	Sugars	C12H22O11	341.109	342.116	0.7012	[M-H]-	0.495662	2	0.9721	rp	57-50-1	5988	HMDB0000258	-	C00089	3.42945e+06	3.71508e+06	4.26783e+06	2.4729e+06	2.55952e+06	2.80705e+06	4.12759e+06	4.13158e+06	4.14167e+06	ko00052,ko00500,ko01100,ko01110,ko02010	1.2186	0.0269179	0.686928	-0.541768	down
T3_negative	MW0115141	Physostigmine	Heterocyclic compounds	Heterocyclic compounds	C15H21N3O2	315.181	275.163	6.104	[M-H+CH3CN]-	2	3	0.5346	rp	57-47-6	5983	HMDB0015116	-	C06535	4193.42	3803.02	4155.76	1743.12	2636.91	1696.5	3304.74	3137.07	3277.64	ko01110	1.21789	0.0124826	0.500035	-0.999898	down
T3_negative	MW0013008	1-Stearoyl-2-oleoyl-sn-glycero-3-phosphocholine	GP	PC	C44H86NO8P	822.571	787.609	7.1752	[M+Cl]-	8.98648	3	0.6751	rp	56421-10-4	24778825	HMDB0008038	-	C00157	66598.1	62716	53895.2	16404.5	23713.6	14982.6	39262.7	39687.3	33682.1	ko00564,ko00590,ko00592,ko01100,ko01110	1.2743	0.00119471	0.300752	-1.73335	down
T3_negative	MW0011071	(R)-2,3-Dihydroxy-3-methylvalerate	Organic acid and Its derivatives	Organic acid and Its derivatives	C6H12O4	129.055	148.074	1.4529	[M-H2O-H]-	0.4	2	0.9677	rp	562-43-6	448154	HMDB0012140	-	C06007	9461.22	10579.8	7951.64	4171.88	3527.87	4007.88	5424.3	5373.94	5372.25	ko00290,ko01100,ko01110,ko01210,ko01230	1.2792	0.0146419	0.41824	-1.2576	down
T3_negative	MW0169369	L-Lysine	Amino acid and Its metabolites	Amino acids	C6H14N2O2	145.098	146.106	0.5463	[M-H]-	0.860145	2	0.9274	rp	56-87-1	5962	HMDB0000182	5200	C00047	127228	129321	111759	57888.7	46440	56453	71975.8	71960	72227.6	ko00300,ko00310,ko00470,ko00780,ko00970,ko01100,ko01110,ko01210,ko01230,ko02010	1.28473	0.00100232	0.436541	-1.19581	down
T3_negative	FDATN01488	L-Glutamic acid	Amino acid and Its metabolites	Amino acids	C5H9NO4	146.046	147.053	0.7012	[M-H]-	0.571802	2	0.9648	rp	56-86-0	33032	HMDB0000148	-	C00025	2.56423e+06	2.49817e+06	2.98955e+06	1.12083e+06	1.124e+06	1.28529e+06	2.88246e+06	2.89921e+06	2.8828e+06	ko00220,ko00250,ko00330,ko00332,ko00340,ko00430,ko00470,ko00480,ko00630,ko00650,ko00660,ko00860,ko00910,ko00970,ko01100,ko01110,ko01200,ko01210,ko01230,ko01240,ko02010	1.29203	0.00548069	0.438419	-1.18962	down
T3_negative	MEDL02760	Glyceraldehyde	Aldehyde,Ketones,Esters	Aldehydes	C3H6O3	111.009	90.0317	0.8038	[M+Na-2H]-	6.025	3	0.7537	rp	56-82-6	751	HMDB0001051	-	C02154	66105.1	66251.2	37229.5	165462	144242	144938	101000	101399	101034	-	1.22414	0.00196577	2.6809	1.42272	up
T3_negative	MW0105531	L-Alanine	Amino acid and Its metabolites	Amino acids	C3H7NO2	88.0403	89.0477	0.6667	[M-H]-	0.0752916	2	0.983	rp	56-41-7	5950	HMDB0000161	-	C00041	47794	52358.8	51176.4	61508.8	56573.9	63434.2	63216.7	65380.7	62837.5	ko00250,ko00270,ko00430,ko00450,ko00470,ko00970,ko01100,ko01110,ko01200,ko01230,ko02010,ko04122	1.18474	0.0196098	1.19948	0.262414	up
T3_negative	MW0146443	Austrobailignan 1	Lignans and Coumarins	Lignans	C21H18O7	441.124	382.105	1.5159	[M+CH3COO]-	11.2573	3	0.7079	rp	55955-07-2	325700	-	-	-	2840.25	3317.1	2142.5	7304.25	6564.85	5800.07	3481.36	3481.33	3486.02	-	1.24603	0.00287477	2.36982	1.24478	up
T3_negative	MW0157149	Soyasaponin II	Terpenoids	Triterpene Saponin	C47H76O17	911.502	912.508	6.118	[M-H]-	3.89397	3	0.7972	rp	55319-36-3	443614	HMDB0034650	-	C12081	1114.57	1698	710.33	7265.15	5919.78	6972.71	3047.87	3051.15	2996.2	-	1.26155	0.000662689	5.72189	2.51649	up
T3_negative	MW0154814	Oxyayanin A	Flavonoids	Flavonoid	C18H16O8	359.073	360.084	1.1826	[M-H]-	11.5617	3	0.7106	rp	549-17-7	5281676	-	-	-	71744.1	73774.4	83065.6	60332.3	49202.1	49014.2	51224.3	51510.4	51112.5	-	1.19675	0.0104177	0.693612	-0.527799	down
T3_negative	MW0004043	3-Hydroxyanthranilic acid	Benzene and substituted derivatives	Benzene and substituted derivatives	C7H7NO3	169.062	153.043	1.6575	[M+NH4-2H]-	0.225	2	0.9614	rp	548-93-6	86	HMDB0001476	3275	C00632	3537.47	2906.77	3565.55	46257.4	46070.3	43545.2	23456.5	23435.4	23425.9	ko00380,ko01100,ko01240	1.31018	0.000215463	13.574	3.76277	up
T3_negative	MW0107214	Taurocyamine	Organic acid and Its derivatives	Sulfonic acids	C3H9N3O3S	333.059	167.036	1.1007	[2M-H]-	16.6194	3	0.8212	rp	543-18-0	68340	HMDB0003584	6962	C01959	371788	434448	398820	752574	673359	788867	660372	676762	676721	ko00430	1.28449	0.0029908	1.83792	0.878076	up
T3_negative	MW0126334	Pyridoxal phosphate	Organic acid and Its derivatives	Organic acid and Its derivatives	C8H10NO6P	246.017	247.025	1.7183	[M-H]-	0.933168	2	0.9554	rp	54-47-7	1051	HMDB0001491	6275	C00018	30840.8	31974.3	22997.3	15667.8	15622.2	15785.8	13958.7	14009.7	14031.8	ko00730,ko00750,ko01100,ko01240	1.2369	0.0445702	0.54859	-0.8662	down
T3_negative	MW0147220	Cartilagineal	Others	Others	C10H11Cl3O	296.99	251.988	1.3999	[M+HCOO]-	15.7001	3	0.6258	rp	53915-35-8	6153559	-	-	-	11531.6	10860.9	10702.3	16137.9	15897.2	14920.4	13327.3	13207.1	12785.2	-	1.28879	0.000943612	1.41882	0.504694	up
T3_negative	MW0138153	Ferulic acid	Phenolic acids	Phenolic acids	C10H10O4	213.056	194.058	4.6002	[M+F]-	2.525	3	0.842	rp	537-98-4	445858	HMDB0000954	4156	C01494	4049.27	4190.7	4413.24	3161.43	3131.02	3695.37	4116.95	3955.4	3979.36	ko01100,ko01110	1.1735	0.0216737	0.789351	-0.341262	down
T3_negative	MW0144438	Ailanthinone	Aldehyde,Ketones,Esters	Ketones	C25H34O9	477.209	478.22	2.639	[M-H]-	10.5869	3	0.6068	rp	53683-73-1	428489	-	-	-	444.31	270.49	166.49	9212.69	5215.65	5931.53	2591.68	2594.5	2636.61	-	1.28535	0.0336068	23.1023	4.52997	up
T3_negative	MW0108117	Malformin A	Heterocyclic compounds	Heterocyclic compounds	C23H39N5O5S2	528.228	529.239	4.295	[M-H]-	10.5645	3	0.5294	rp	53571-13-4	4005	HMDB0029429	-	-	879.97	1757.62	803.25	14091.8	9601.27	10863.1	5509.54	5631.79	5623.22	-	1.27928	0.0128084	10.043	3.32811	up
T3_negative	MW0147772	Coproporphyrin I	Organic acid and Its derivatives	Organic acid and Its derivatives	C36H38N4O8	653.262	654.269	6.4003	[M-H]-	0.126786	2	0.9289	rp	531-14-6	68271	HMDB0000643	-	C05769	2864.38	5262.88	4075.19	917.68	238	887.69	4856.04	4760.81	4677.86	ko00860,ko01100,ko01110	1.17024	0.0299038	0.167456	-2.57815	down
T3_negative	MW0103629	NADPH	CoEnzyme and vitamins	CoEnzyme and vitamins	C21H30N7O17P3	744.06	745.091	1.7101	[M-H]-	19.9277	2	0.8068	rp	53-57-6	5884	HMDB0000221	3691	C00005	9491.47	9337.28	11171.3	5676.64	5115.88	4836.41	3599.16	3369.99	2782.96	ko00480,ko01100	1.27901	0.00706931	0.520964	-0.940745	down
T3_negative	MW0126337	Pyridoxamine phosphate	Organic acid and Its derivatives	Organic acid and Its derivatives	C8H13N2O5P	267.055	248.056	1.3571	[M+F]-	0.775	2	0.9154	rp	529-96-4	1053	HMDB0001555	-	C00647	10255.1	14421.5	8976.76	4097.15	3475.06	3279.83	5385.84	5399.6	5333.59	ko00750,ko01100	1.26319	0.0410791	0.322465	-1.63278	down
T3_negative	MW0103710	Uridine-diphosphate-N-acetylglucosamine	Nucleotide and Its metabolites	Nucleotide and Its metabolites	C17H27N3O17P2	628.057	607.082	1.3281	[M+Na-2H]-	1.00309	2	0.9383	rp	528-04-1	445675	HMDB0000290	5281	C00043	267782	268345	257237	574447	533414	560047	430575	426594	429286	ko00520,ko01100,ko01250	1.30952	0.000770669	2.10233	1.07199	up
T3_negative	MW0105622	Amphibine H	Benzene and substituted derivatives	Benzene and substituted derivatives	C33H43N5O6	604.302	605.321	4.6595	[M-H]-	14.9574	3	0.7437	rp	52659-55-9	51029223	HMDB0029333	-	-	904.46	1872.88	559.6	4906.66	4308.13	3531.31	2263.55	2231.97	2252.43	-	1.17338	0.00497624	3.8197	1.93346	up
T3_negative	MEDN0239	Gluconic Acid	Carbohydrates and Its metabolites	Sugar acids	C6H12O7	391.101	196.058	1.1314	[2M-H]-	22.997	1b	0.611	rp	526-95-4	10690	HMDB0000625	345	C00257	142606	108153	206979	687531	641589	643435	331674	327799	330952	ko00030,ko01100,ko01110,ko01200	1.27218	0.000582854	4.30935	2.10747	up
T3_negative	MW0139330	Phellamurin	Heterocyclic compounds	Heterocyclic compounds	C26H30O11	553.154	518.179	1.1314	[M+Cl]-	9.05808	3	0.7229	rp	52589-11-4	193876	HMDB0031876	-	C09808	228590	187788	330077	1.06301e+06	952956	997317	499332	495836	499426	-	1.27726	0.000220198	4.03679	2.01321	up
T3_negative	MEDP0327	N-γ-Acetyl-N-2-Formyl-5-Methoxykynurenamine	Alcohol and amines	Amines	C13H16N2O4	304.13	264.111	2.7113	[M-H+CH3CN]-	1.425	3	0.8639	rp	52450-38-1	171161	HMDB0004259	-	C05642	6917.84	7644.66	6422.92	3314.44	3185.71	2630.3	4133.68	4166.15	4162.42	ko00380	1.28469	0.00172302	0.435085	-1.20063	down
T3_negative	MW0139954	Wedelolactone	Aldehyde,Ketones,Esters	Ketones	C16H10O7	313.044	314.043	1.1314	[M-H]-	18.7328	3	0.6725	rp	524-12-9	5281813	-	48360	-	89721.4	108141	89854.3	22409	25081.8	12067.4	56776.2	57528.2	56201.9	-	1.26123	0.00102231	0.207003	-2.27228	down
T3_negative	MW0151860	Isoprothiolane sulfoxide	Organic acid and Its derivatives	Organic acid and Its derivatives	C12H18O5S2	305.051	306.06	1.4514	[M-H]-	11.6064	3	0.6985	rp	52303-69-2	93275	-	-	-	13885.7	12275.3	10354.7	3118.42	2908.53	2770.62	8089.51	7754.1	8138.62	-	1.30116	0.0113811	0.240925	-2.05334	down
T3_negative	MW0170025	Yohimbic Acid	Organic acid and Its derivatives	Organic acid and Its derivatives	C20H24N2O3	339.165	340.179	8.2261	[M-H]-	18.9114	3	0.8297	rp	522-87-2	72131	-	43847	-	14134.1	16361.6	10043	40566.2	35197.4	28331.2	17979	18071.2	17863.3	-	1.22864	0.0129092	2.56779	1.36053	up
T3_negative	MW0126274	Psilocybine	Benzene and substituted derivatives	Benzene and substituted derivatives	C12H17N2O4P	343.103	284.093	2.8396	[M+CH3COO]-	8.94437	3	0.7981	rp	520-52-5	10624	-	66689	C07576	17704	17272.2	14547.1	6629.77	12777	10079.8	10359.6	9874.28	10413.5	ko01100,ko01110	1.06328	0.0436606	0.595408	-0.74805	down
T3_negative	MW0126149	Pipemidic acid	Organic acid and Its derivatives	Organic acid and Its derivatives	C14H17N5O3	605.268	303.133	2.3568	[2M-H]-	15.3017	3	0.7835	rp	51940-44-4	4831	HMDB0041989	-	-	66.83	335.72	134.11	16189.2	10767.1	12857	4170.94	4080.68	4071.81	-	1.28349	0.0140502	74.1872	6.2131	up
T3_negative	MW0123377	Citrinin	Heterocyclic compounds	Heterocyclic compounds	C13H14O5	309.095	250.084	4.6258	[M+CH3COO]-	6.0976	3	0.7835	rp	518-75-2 | 11118-72-2	54680783	HMDB0041857	-	-	19877.1	17768.7	20817.3	16182.9	16509.2	15305.7	9065.41	8932.77	9052.05	-	1.15878	0.0458551	0.820992	-0.28456	down
T3_negative	MW0105168	Succinylacetone	Organic acid and Its derivatives	Organic acid and Its derivatives	C7H10O4	203.05	158.058	1.6575	[M+HCOO]-	12.8903	3	0.7581	rp	51568-18-4	5312	HMDB0000635	5608	-	7226.38	5892.16	8392.52	89224.8	86968.1	79642.1	44827.1	44887.7	44880.5	-	1.30711	0.000766314	11.8932	3.57206	up
T3_negative	MEDTP02919	Soyasaponin I	Terpenoids	Triterpene Saponin	C48H78O18	941.512	942.519	5.9948	[M-H]-	1.10461	3	0.7392	rp	51330-27-9	122097	HMDB0034649	-	C08983	4569	4298.98	1890.34	18711.3	16970.6	15031.1	9233.99	9100.63	9240.6	-	1.2344	0.000768546	4.71384	2.2369	up
T3_negative	MW0054720	3-Hydroxymethylglutaric acid	Organic acid and Its derivatives	Organic acid and Its derivatives	C6H10O5	161.046	162.053	1.4625	[M-H]-	1.40614	2	0.916	rp	503-49-1	1662	HMDB0000355	5344	C03761	23419.8	23177.1	20428.5	47088.4	33720.2	41883.5	27009.6	26829.1	26866	-	1.23785	0.0349103	1.83053	0.872261	up
T3_negative	MEDL00439	Lactic acid	Organic acid and Its derivatives	Organic acid and Its derivatives	C3H6O3	89.0245	90.0317	1.1314	[M-H]-	0.356562	2	0.9185	rp	50-21-5 | 26100-51-6 | 598-82-3 | 26811-96-1	612	HMDB0144295	-	C01432	55129.8	63821.4	64230.6	87911.6	85356.6	102172	65650.8	66614.9	66623.5	-	1.2331	0.0126713	1.50364	0.588461	up
T3_negative	MW0114557	Glucotropaeolin	Benzene and substituted derivatives	Benzene and substituted derivatives	C14H19NO9S2	409.054	409.05	1.6527	[M-]-	6.32092	3	0.6458	rp	499-26-3	656498	HMDB0038419	-	C02153	25509.6	24819.7	22618.9	20436.7	22327.9	20553.9	7896.98	7541.51	7442.52	ko01110,ko01210	1.10057	0.0453391	0.867992	-0.204247	down
T3_negative	MEDN1093	2-Isopropylmalate	Organic acid and Its derivatives	Organic acid and Its derivatives	C7H12O5	175.061	176.069	2.8748	[M-H]-	0.34998	1a	0.9284	rp	49601-06-1	5280523	HMDB0000402	339	C02504	31019.4	32350.5	23910.1	16184.7	14417.4	13894.8	18679	18691.7	18607.3	ko00290,ko00620,ko01100,ko01110,ko01210,ko01230	1.25098	0.0257626	0.509817	-0.971948	down
T3_negative	MW0007319	Hippuric acid	Organic acid and Its derivatives	Organic acid and Its derivatives	C9H9NO3	224.051	179.058	1.9568	[M+HCOO]-	7.6759	3	0.5263	rp	495-69-2	464	HMDB0000714	1301	C01586	3526.94	2220.17	2813.94	6239.09	6725.24	6024.84	4248.56	4222.19	4239.35	-	1.24228	0.00351053	2.21809	1.14932	up
T3_negative	MW0109002	Ophthalmic acid	Amino acid and Its metabolites	Small Peptide	C11H19N3O6	288.12	289.127	1.1396	[M-H]-	1.04586	3	0.8122	rp	495-27-2	7018721	HMDB0005765	-	-	66510.4	69562.1	63767.8	183218	157072	175390	111559	112387	112366	-	1.30511	0.00393572	2.58046	1.36763	up
T3_negative	MEDP0882	Thiamine-Monophosphate	Organic acid and Its derivatives	Organic acid and Its derivatives	C12H18N4O4PS+	345.079	345.079	1.5159	[M-]-	2.85681	1b	0.6865	rp	495-23-8	3382778	HMDB0002666	-	C01081	3819.64	4299.53	3284.82	18425.3	16818.2	16150.6	8221.07	8404.65	8489.64	ko00730,ko01100,ko01240	1.30358	0.000636558	4.50667	2.17206	up
T3_negative	MW0004001	3-Furoic acid	Organic acid and Its derivatives	Organic acid and Its derivatives	C5H4O3	111.009	112.016	1.1486	[M-H]-	0.0947343	3	0.5835	rp	488-93-7	10268	HMDB0000444	5433	-	36172.4	39187.2	24917.2	82717.7	70705.6	76102.9	57475.4	57979.5	57513.7	-	1.24029	0.00180818	2.28893	1.19467	up
T3_negative	MEDN0622	Porphobilinogen	Organic acid and Its derivatives	Organic acid and Its derivatives	C10H14N2O4	225.088	226.095	1.4161	[M-H]-	0.290222	1a	0.8685	rp	487-90-1	1021	HMDB0000245	-	C00931	28058.9	29074.6	25611.3	995.95	3824.78	1342.76	11492	11586.5	11589.7	ko00860,ko01100,ko01110,ko01240	1.2611	5.50149e-05	0.0744879	-3.74685	down
T3_negative	MW0169017	Daidzein	Flavonoids	Isoflavones	C15H10O4	313.078	254.058	7.0994	[M+CH3COO]-	14.6917	2	0.9112	rp	486-66-8	5281708	HMDB0003312	-	C10208	35248.2	40720.7	37314.1	29876.8	33782.9	28381.7	23882.2	24490	24305.3	ko01100,ko01110	1.10989	0.0354065	0.81249	-0.299577	down
T3_negative	MW0006337	Bergenin	Benzene and substituted derivatives	Benzene and substituted derivatives	C14H16O9	328.077	328.079	1.9568	[M-]-	5.90444	3	0.7093	rp	477-90-7	66065	-	43945	C09919	13771.6	14619.3	14489.2	21982.3	22977.5	21416.2	18198.9	18201.5	18049.3	-	1.30082	0.000462226	1.54794	0.630352	up
T3_negative	MW0169104	Ellagic acid	Benzene and substituted derivatives	Phenolics	C14H6O8	300.991	302.006	1.3744	[M-H]-	19.8946	3	0.6174	rp	476-66-4	5281855	HMDB0002899	3430	C10788	13234.3	14337.7	12776.4	23193.8	25523	23526.2	18043.1	18048.2	17818.5	-	1.29546	0.000616657	1.79048	0.840345	up
T3_negative	MW0015301	8-Amino-7-oxononanoic acid	Organic acid and Its derivatives	Organic acid and Its derivatives	C9H17NO3	227.14	187.121	2.292	[M-H+CH3CN]-	1.35	3	0.7569	rp	4707-58-8	173	HMDB0037790	-	C01092	1667.64	1532.92	4267.41	7713.13	8199.26	8658.7	6683.68	6146.81	6768.95	ko00780,ko01100,ko01240	1.17108	0.0167004	3.2902	1.71817	up
T3_negative	MW0015942	Asiatic acid	Organic acid and Its derivatives	Organic acid and Its derivatives	C30H48O5	523.318	488.35	6.2757	[M+Cl]-	9.23664	3	0.8434	rp	464-92-6	119034	-	-	C08617	2414.35	2832.77	2452.45	702.63	1247.63	838.71	1663.69	1698.58	1521.11	-	1.24532	0.0017569	0.362224	-1.46505	down
T3_negative	MW0140011	alpha-Linolenic acid	FA	FFA	C18H30O2	277.217	278.225	7.9021	[M-H]-	0.3	3	0.6899	rp	463-40-1	5280934	HMDB0001388	6208	C06427	218.72	774.06	295.89	11257.1	18946.5	11563	4533.68	4558.71	4664.35	ko00592,ko01040,ko01100,ko01110	1.27732	0.0324758	32.4106	5.01839	up
T3_negative	MW0114039	Carbomycin	Heterocyclic compounds	Heterocyclic compounds	C42H67NO16	840.447	841.446	3.9017	[M-H]-	17.3713	3	0.8075	rp	4564-87-8	5287879	-	85097	-	474.35	475.15	231.85	3817.69	2670.53	3032.17	1316.01	1162.85	1297.76	-	1.27511	0.0111009	8.05891	3.01058	up
T3_negative	MW0115409	Trehalose-6-phosphate	Carbohydrates and Its metabolites	Phosphate sugars	C12H23O14P	421.074	422.082	1.114	[M-H]-	0.248752	3	0.7769	rp	4484-88-2	122336	HMDB0001124	6019	C00689	104667	85078.3	78421.3	51424.2	48375.3	52567.9	79143.6	79762.3	82201.2	ko00500,ko01100,ko01110	1.24875	0.0363835	0.568181	-0.815577	down
T3_negative	MW0169480	Metronidazole	Heterocyclic compounds	Heterocyclic compounds	C6H9N3O3	206.039	171.064	1.2345	[M+Cl]-	7.63468	3	0.6262	rp	443-48-1	4173	HMDB0015052	-	C07203	271.34	6796.25	361.45	45084.1	39388.3	41261.7	21871.8	21838.8	21963.8	-	1.15827	0.000195711	16.9247	4.08106	up
T3_negative	MEDP2244	BAY-60-7550	Benzene and substituted derivatives	Benzene and substituted derivatives	C27H32N4O4	475.268	476.242	7.0481	[M-H]-	22.0487	1b	0.6459	rp	439083-90-6	135564787	-	-	C90482	626.54	506.99	570.7	3810.5	3645.28	3506.58	1549.8	1547.2	1470.47	-	1.30887	0.000177792	6.43244	2.68537	up
T3_negative	MW0062272	Prostaglandin h2	Hormones and hormone related compounds	Hormones and hormone related compounds	C20H32O5	368.244	352.225	8.2216	[M+NH4-2H]-	1.425	2	0.9988	rp	42935-17-1	445049	HMDB0001381	3495	C00427	1191.66	702.14	2451.91	13404.8	16322.4	10575	8850.7	8790.61	8774.45	ko00590,ko01100	1.24622	0.0124989	9.27402	3.21319	up
T3_negative	MW0157951	(1S,2R)-3-Methylcyclohexa-3,5-diene-1,2-diol	Alcohol and amines	Alcohols	C7H10O2	147.045	126.068	1.9568	[M+Na-2H]-	5.8	3	0.7678	rp	41977-20-2	440399	-	-	C04592	24774.3	26878.6	22587.7	61575.8	59120.7	56032.5	32709.7	32617.3	32477	ko01100	1.30085	0.00011101	2.38049	1.25126	up
T3_negative	FDATN00826	Pyridoxal phosphate hydrate	Others	Medicine	C8H12NO7P	529.062	265.035	1.6833	[2M-H]-	3.13938	3	0.7885	rp	41468-25-1 | 853645-22-4	38882	-	-	-	21081.6	23169.2	24480	16901	11980.3	16116.4	19258.9	19105.4	19261.5	-	1.15163	0.0169844	0.654695	-0.611105	down
T3_negative	MW0157328	Tabtoxin	Amino acid and Its metabolites	Small Peptide	C11H19N3O6	308.117	289.127	6.4708	[M+F]-	22.975	3	0.5969	rp	40957-90-2	107817	-	-	C20917	12075.4	11900	14245.9	10321.5	7771.24	7398.66	13086.7	12578.5	12233.1	ko00261,ko01110	1.1352	0.0248734	0.666945	-0.584361	down
T3_negative	MW0013504	2-Hydroxy-3-Methylbutanoic Acid	Organic acid and Its derivatives	Organic acid and Its derivatives	C5H10O3	117.056	118.063	2.5925	[M-H]-	2.01386	2	0.9243	rp	4026-18-0	99823	HMDB0000407	5396	-	466.77	413.53	381.39	2150.68	2034.94	1657.72	530.1	567.28	548.1	-	1.30109	0.00799167	4.63136	2.21144	up
T3_negative	MW0138292	Glycitin	Flavonoids	Isoflavones	C22H22O10	481.09	446.121	1.2786	[M+Cl]-	2.44201	3	0.6438	rp	40246-10-4	187808	-	64303	-	63326	70389.5	54408.1	85806.1	86770.9	91359.7	71192.9	70860.2	71717.8	-	1.1971	0.0213711	1.403	0.488511	up
T3_negative	MW0107376	Homovanillic acid sulfate	Organic acid and Its derivatives	Organic acid and Its derivatives	C9H10O7S	261.009	262.015	1.6575	[M-H]-	4.60939	3	0.7168	rp	38339-06-9	29981063	HMDB0011719	-	-	318.88	436.61	764.27	6785.13	8681.86	7373.99	2736.15	2802.89	2334	-	1.28815	0.00430287	15.0293	3.90971	up
T3_negative	MEDL00375	Oglufanide	Amino acid and Its metabolites	Small Peptide	C16H19N3O5	314.125	333.132	2.3735	[M-H2O-H]-	23.2597	3	0.7493	rp	38101-59-6	100094	HMDB0028830	-	-	148010	159889	124858	25152.5	21980.3	22214.9	66902.9	66892.1	67010.9	-	1.30618	0.00670584	0.160247	-2.64163	down
T3_negative	MW0103653	Ribavirin	Nucleotide and Its metabolites	Nucleotide and Its metabolites	C8H12N4O5	279.048	244.081	0.7183	[M+Cl]-	4.02209	2	0.8014	rp	36791-04-5	37542	HMDB0014949	-	-	1.37582e+06	1.49984e+06	1.06098e+06	399930	440705	485451	996617	1.00246e+06	996470	-	1.28197	0.0188878	0.336858	-1.56979	down
T3_negative	MW0103675	Thymidine-5'-phosphate	Nucleotide and Its metabolites	Nucleotide and Its metabolites	C10H15N2O8P	321.049	322.057	1.6223	[M-H]-	1.37259	2	0.813	rp	365-07-1	9700	HMDB0001227	6092	C00364	38239	43781.3	37171.7	30552.9	25524.6	27781.8	27850	27700.4	27703.2	ko00240,ko01100,ko01232	1.21076	0.0120205	0.703565	-0.507244	down
T3_negative	MW0005864	7-Hydroxy-2-acetamidofluorene	Benzene and substituted derivatives	Benzene and substituted derivatives	C15H13NO2	239.101	239.095	0.5281	[M-]-	8.46607	3	0.714	rp	363-49-5	9695	-	-	-	6701.2	6989.21	6211.97	1809.16	1310.38	647.91	2943.2	2866.75	2928.08	-	1.23915	0.000402855	0.189296	-2.40128	down
T3_negative	MW0138908	Maytansine	Heterocyclic compounds	Heterocyclic compounds	C34H46ClN3O10	690.278	691.287	3.3683	[M-H]-	3.65839	3	0.5949	rp	35846-53-8	5281828	-	40981	-	2545.92	4865.49	664.92	11800.3	7852.96	10090.2	5314.41	5181.1	5193.38	-	1.04655	0.0124484	3.68279	1.8808	up
T3_negative	MEDTN02419	Homocitric acid	Organic acid and Its derivatives	Organic acid and Its derivatives	C7H10O7	205.026	206.043	1.4447	[M-H]-	1.42665	2	0.9551	rp	3562-74-1	28371	HMDB03518	-	-	11199.3	10220.3	5918.92	110968	112627	109384	59657.5	57169.6	36408	-	1.2961	7.40885e-06	12.1798	3.60642	up
T3_negative	MW0142236	2-Amino-4-hydroxy-6-pyrophosphoryl-methylpteridine	Others	Others	C7H11N5O8P2	335.988	355.008	1.3744	[M-H2O-H]-	5.0161	3	0.6724	rp	3545-84-4	135398612	-	-	C04807	3977.27	4137.42	4890.28	11024.6	12586.8	12437.2	7059.19	7124.61	7193.64	ko00790,ko01100,ko01240	1.29723	0.000679885	2.7719	1.47088	up
T3_negative	MW0005721	5-Nonadecyl-1,3-benzenediol	Benzene and substituted derivatives	Phenolics	C25H44O2	375.325	376.334	6.9795	[M-H]-	6.07645	3	0.7439	rp	35176-46-6	161858	HMDB0030956	-	-	14387.2	14730.5	11811.2	6400.89	9577	6446.84	8961.04	8824.47	8898.82	-	1.1827	0.0120238	0.547894	-0.868031	down
T3_negative	MEDL00860	D-Ornithine	Amino acid and Its metabolites	Amino acids	C5H12N2O2	131.083	132.09	0.6493	[M-H]-	0.2	3	0.7461	rp	348-66-3	71082	HMDB0003374	6910	C00515	10862.2	17129	12855.1	26993.2	22880.2	31800.8	20956.5	18460.7	19516.4	ko00470,ko01100,ko01110	1.1914	0.0157155	1.99955	0.999677	up
T3_negative	MW0148172	N-Deacetylcolchicine	Alkaloids	Alkaloids	C20H23NO5	356.143	357.158	1.8864	[M-H]-	17.5118	3	0.666	rp	3476-50-4	18991	-	-	-	6928.07	5217.65	4526.92	281.91	522.8	109.64	856.17	812.67	822.37	-	1.25661	0.0158671	0.0548413	-4.18859	down
T3_negative	MW0114793	Maltopentaose	Carbohydrates and Its metabolites	Sugars	C30H52O26	863.245	828.275	1.1237	[M+Cl]-	1.47136	3	0.7296	rp	34620-76-3	124005	-	-	-	39847.3	25490.6	54101.8	181753	185620	180154	82720.4	82409.8	81458.2	-	1.26384	0.00248161	4.58413	2.19665	up
T3_negative	MW0112272	2-Phospho-D-Glyceric Acid	Organic acid and Its derivatives	Phosphoric acids	C3H7O7P	184.986	185.993	1.1396	[M-H]-	0.334681	2	0.9565	rp	3443-57-0	439278	HMDB0003391	6915	C00631	16950.2	16259.8	8119.22	541.11	956.13	604.99	9848.72	10321.8	9652.45	ko00010,ko00030,ko00260,ko00561,ko00630,ko00680,ko01100,ko01110,ko01200,ko01230	1.28786	0.0436935	0.0508654	-4.29717	down
T3_negative	MEDN0528	(3-Methoxy-4-hydroxyphenyl)ethylene glycol sulfate	Organic acid and Its derivatives	Organic acid and Its derivatives	C9H12O7S	323.034	264.03	2.4622	[M+CH3COO]-	20.4991	3	0.711	rp	3415-67-6	4183	HMDB0000559	5543	-	1690.63	1036.99	1557.3	14414.3	10894	15445.1	9489.76	9482.79	9720.29	-	1.29582	0.011323	9.51087	3.24958	up
T3_negative	MW0103348	2'-Deoxyinosine 5'-monophosphate	Nucleotide and Its metabolites	Nucleotide and Its metabolites	C10H13N4O7P	331.053	332.052	1.9568	[M-H]-	20.9405	3	0.7108	rp	3393-18-8 | 14999-52-1 | 16531-83-2	135398614	HMDB0006555	-	C06196	2755	2492.11	2454.55	3893.9	3914.2	4431.75	3249.97	3195.7	3247.14	ko00230,ko01232	1.27635	0.00443231	1.58925	0.668345	up
T3_negative	MW0054026	1-O-Acetylbritannilactone	Aldehyde,Ketones,Esters	Ketones	C17H24O5	307.151	308.162	0.6667	[M-H]-	11.6045	3	0.686	rp	33627-41-7	75528891	-	-	-	52240.6	71064.1	73602.3	15313.7	12817.7	13980.1	26771.8	25987.6	26494.8	-	1.29559	0.0157693	0.213865	-2.22523	down
T3_negative	ZINC5849312	8-Desoxygartanin	Heterocyclic compounds	Heterocyclic compounds	C23H24O5	379.157	380.162	8.2081	[M-H]-	2.58098	3	0.757	rp	33390-41-9	392450	HMDB0030701	-	-	782.77	693.75	840.16	2841.2	5385.13	4085.2	3511.2	3439.15	3400.56	-	1.27512	0.0448943	5.3143	2.40988	up
T3_negative	MW0054223	k-Strophanthoside	Heterocyclic compounds	Heterocyclic compounds	C42H64O19	907.392	872.404	2.6076	[M+Cl]-	17.2025	3	0.7845	rp	33279-57-1	20055295	-	-	-	208.12	551.64	239.69	12263.9	7283.47	8198.18	3187.78	3252.21	3261.88	-	1.28683	0.0277114	27.7608	4.79498	up
T3_negative	MW0118118	2-(2-(4-Bromophenyl)-6-methylpyrimidin-4-ylamino)ethanol	Heterocyclic compounds	Heterocyclic compounds	C13H14BrN3O	366.053	307.032	4.4677	[M+CH3COO]-	16.6781	3	0.6821	rp	330981-72-1	5332859	-	64774	-	46266.4	41972.6	41132.4	29728.5	33843.8	33910.7	38277	37630.5	37712.7	-	1.21994	0.00763365	0.753513	-0.408295	down
T3_negative	MW0105600	Alpha-Ketooctanoic acid	Organic acid and Its derivatives	Organic acid and Its derivatives	C8H14O3	157.087	158.094	3.7954	[M-H]-	1.63384	3	0.6618	rp	328-51-8	67600	HMDB0013211	-	-	752.76	930.74	595.3	302.44	551.8	333.82	2051.71	2100.94	2099.03	-	1.09215	0.045691	0.521353	-0.939667	down
T3_negative	MW0109017	Oxalacetic acid	Organic acid and Its derivatives	Organic acid and Its derivatives	C4H4O5	191.02	132.006	0.8038	[M+CH3COO]-	0.755984	3	0.6622	rp	328-42-7	970	HMDB0000223	123	C00036	1.463e+06	1.51138e+06	900126	3.56819e+06	3.30811e+06	3.28836e+06	2.34631e+06	2.35376e+06	2.35385e+06	ko00010,ko00020,ko00250,ko00470,ko00620,ko00630,ko00680,ko00999,ko01100,ko01110,ko01200,ko01210,ko01230,ko01240	1.24144	0.00303684	2.62348	1.39148	up
T3_negative	MEDP0519	L-Norleucine	Amino acid and Its metabolites	Amino acids	C6H13NO2	130.087	131.095	1.1656	[M-H]-	0.262288	2	0.9379	rp	327-57-1	21236	HMDB0001645	6334	C01933	70579.6	94062.9	61914.4	122446	118352	109678	77203.2	77423.5	78020.9	-	1.1413	0.0362742	1.54697	0.629443	up
T3_negative	MW0103673	Thymidine glycol	Nucleotide and Its metabolites	Nucleotide and Its metabolites	C10H16N2O7	257.078	276.096	1.851	[M-H2O-H]-	0.739911	3	0.7181	rp	32645-65-1	3035041	HMDB0042036	-	-	5378.55	7537.87	4823.7	15473.2	14445.7	13919	7469.16	7555.75	7472.64	-	1.25719	0.00233649	2.47112	1.30516	up
T3_negative	MW0169311	Isocitric acid	Organic acid and Its derivatives	Organic acid and Its derivatives	C6H8O7	173.009	192.027	1.1486	[M-H2O-H]-	0.5	2	0.945	rp	320-77-4	1198	HMDB0000193	3328	C00311	29468.4	27595.8	15520.2	57519.6	54749.6	55171.8	45075.5	45066.4	44714.9	ko00020,ko00630,ko01100,ko01110,ko01200,ko01210,ko01230,ko01240	1.18882	0.0157208	2.30685	1.20592	up
T3_negative	MW0167999	(6R)-5,10-Methylenetetrahydrofolate	Others	Others	C20H23N7O6	456.167	457.171	2.4485	[M-H]-	7.93575	3	0.7727	rp	31690-11-6 | 3432-99-3	135398645	-	-	-	2001.83	2519.3	2042.43	6609.8	6599.27	6122.47	4333.2	4258.35	4239.03	-	1.29861	5.16133e-05	2.94528	1.55841	up
T3_negative	MEDN0445	Orotidine	CoEnzyme and vitamins	CoEnzyme and vitamins	C10H12N2O8	323.029	288.059	0.7866	[M+Cl]-	1.25993	1b	0.7986	rp	314-50-1	92751	HMDB0000788	5754	C01103	2.15369e+06	2.55123e+06	1.76998e+06	3.20907e+06	3.5069e+06	3.28001e+06	2.85884e+06	2.85459e+06	2.85398e+06	ko00240,ko01100,ko01240	1.177	0.0229128	1.5438	0.626489	up
T3_negative	MW0004531	4-[[4-(4-Chlorophenyl)-2-thiazolyl]amino]phenol	Benzene and substituted derivatives	Benzene and substituted derivatives	C15H11ClN2OS	361.038	302.028	1.648	[M+CH3COO]-	9.2108	3	0.7884	rp	312636-16-1	753704	-	64669	-	4221.99	4668.87	1799.74	19839.8	20375.2	19328.6	10964.8	10978	10758.1	-	1.24327	0.00126106	5.56971	2.4776	up
T3_negative	MW0103583	Guanosine diphosphate mannose	Nucleotide and Its metabolites	Nucleotide and Its metabolites	C16H25N5O16P2	626.051	605.077	1.2872	[M+Na-2H]-	0.71879	2	0.9934	rp	3123-67-9	135398627	HMDB0001163	-	C00096	26145.4	23672.5	24907.2	8799.17	8309.45	8868.93	18762.3	18791.9	18334.4	ko00051,ko00053,ko00510,ko00520,ko01100,ko01110,ko01240,ko01250	1.30878	0.00113881	0.347642	-1.52433	down
T3_negative	MW0143399	4-Methylene-L-glutamine	Amino acid and Its metabolites	Amino acid derivatives	C6H10N2O3	157.062	158.069	1.6575	[M-H]-	0.183643	3	0.6897	rp	31138-12-2	439401	-	-	C01109	243.99	69.61	324.54	7611.83	6325.82	6433.54	3425.95	3374.07	3426	ko00660	1.26968	0.00304957	31.9228	4.99651	up
T3_negative	MW0108608	Spaglumic acid	Amino acid and Its metabolites	Amino acid derivatives	C11H16N2O8	303.093	304.091	1.4147	[M-H]-	22.3088	3	0.6502	rp	3106-85-2	188803	HMDB0001067	-	C12270	10050.2	9529.7	9683.75	6335.34	6081.99	5029.15	6035.31	6032.18	6012.57	ko00250,ko01100	1.26443	0.00484852	0.596182	-0.746175	down
T3_negative	MW0007515	Lofexidine	Benzene and substituted derivatives	Benzene and substituted derivatives	C11H12Cl2N2O	257.028	258.033	1.3571	[M-H]-	7.97016	3	0.7187	rp	31036-80-3	30668	HMDB0015606	-	-	111437	133541	101426	316603	315042	320014	187076	186281	185445	-	1.29584	0.00179684	2.74725	1.45799	up
T3_negative	MW0103521	Cmp-nana	Nucleotide and Its metabolites	Nucleotide and Its metabolites	C20H31N4O16P	613.144	614.147	0.7694	[M-H]-	7.05586	3	0.7678	rp	3063-71-6	18292	-	434	-	26278.3	25035.9	21263.2	55744.3	53253.8	50414.6	47086.6	46760	46523.5	-	1.29177	0.000178224	2.19645	1.13517	up
T3_negative	MW0006026	2,2-Diphenylglycine	Benzene and substituted derivatives	Benzene and substituted derivatives	C14H13NO2	272.089	227.095	1.1314	[M+HCOO]-	4.483	3	0.7589	rp	3060-50-2	18289	-	1858	-	103407	107048	96002.6	150960	135321	150520	109391	109205	109254	-	1.2679	0.00376638	1.42533	0.511293	up
T3_negative	MW0007328	Homovanillic acid	Organic acid and Its derivatives	Organic acid and Its derivatives	C9H10O4	363.112	182.058	1.4135	[2M-H]-	8.95	3	0.6117	rp	306-08-1	1738	HMDB0000118	971	C05582	4044.43	4229.4	4004.36	2253.11	2027.6	2562.13	1853.33	1624.66	1918.4	ko00350,ko01100	1.27504	0.00248524	0.557317	-0.843431	down
T3_negative	MW0103490	CDP-ethanolamine	Nucleotide and Its metabolites	Nucleotide and Its metabolites	C11H20N4O11P2	486.084	446.06	1.5868	[M-H+CH3CN]-	11.1093	3	0.5034	rp	3036-18-8	123727	HMDB0001564	3538	C00570	1300.97	1688.96	1265.98	9129.77	11843.1	6726.89	3778.31	4036.06	4004.55	ko00564,ko01100	1.28469	0.0330258	6.50855	2.70234	up
T3_negative	MW0103476	AICA ribonucleotide	Nucleotide and Its metabolites	Nucleotide and Its metabolites	C9H15N4O8P	675.121	338.063	0.7866	[2M-H]-	5.87707	3	0.7285	rp	3031-94-5	65110	HMDB0001517	6294	C04677	148926	161290	104802	272166	281916	258913	108330	110765	110824	ko00230,ko00340,ko01100,ko01110	1.22129	0.00881294	1.95894	0.970074	up
T3_negative	MW0160370	Mandelonitrile-beta-gentiobioside	Heterocyclic compounds	Heterocyclic compounds	C20H27NO11	478.129	457.158	2.3623	[M+Na-2H]-	9.43252	3	0.7371	rp	29883-15-6	656495	-	-	-	3787.79	3704.14	4307.93	236.58	409.89	745.5	1066.57	980.34	1005.21	-	1.25747	0.000186851	0.117965	-3.08357	down
T3_negative	MW0120986	Leukoaminochrome	Heterocyclic compounds	Heterocyclic compounds	C8H9NO2	170.065	151.063	1.6575	[M+F]-	6.925	3	0.7385	rp	29539-03-5	147311	HMDB0012992	-	C17756	70.52	46.78	76.49	3322.74	3202.06	2789.11	1115.91	1127.87	1116.38	-	1.30756	0.00274127	48.0619	5.58682	up
T3_negative	MEDP1963	S-Methylglutathione	Amino acid and Its metabolites	Small Peptide	C11H19N3O6S	320.091	321.099	1.3048	[M-H]-	1.65	3	0.6124	rp	2922-56-7	115260	-	-	C11347	3971.87	4560.72	2983.63	18080.3	15318.6	16745.3	8159.78	8137.34	8229.87	-	1.29182	0.000561841	4.35423	2.12242	up
T3_negative	MW0000332	Methyl reserpate	Alkaloids	Alkaloids	C23H30N2O5	413.204	414.216	2.4687	[M-H]-	12.6684	3	0.8171	rp	2901-66-8	73532	-	2254	-	12500.4	15046.4	9043.28	39429.2	31064.2	33478.1	17364.8	17370.9	17533.4	-	1.25411	0.00271349	2.84152	1.50666	up
T3_negative	MW0114309	Mannose 1-phosphate	Carbohydrates and Its metabolites	Phosphate sugars	C6H13O9P	259.022	260.03	0.7353	[M-H]-	0.382124	2	0.9427	rp	27251-84-9	644175	HMDB0006330	64616	-	1.31355e+06	1.40438e+06	1.54041e+06	246243	240389	271955	1.02435e+06	1.02364e+06	1.01744e+06	-	1.3087	0.00268372	0.178142	-2.4889	down
T3_negative	MW0147106	Carfecillin	Organic acid and Its derivatives	Organic acid and Its derivatives	C23H22N2O6S	454.123	454.12	2.4335	[M-]-	4.72232	3	0.6781	rp	27025-49-6	33672	-	-	-	11212.9	10549.9	11102.9	6825.87	6171.24	7032.58	9222.77	9141.5	9148.44	-	1.29059	0.000280416	0.609441	-0.714441	down
T3_negative	MW0115265	Sedoheptulose 7-phosphate	Carbohydrates and Its metabolites	Phosphate sugars	C7H15O10P	289.033	290.04	1.114	[M-H]-	0.971588	2	0.9274	rp	2646-35-7	165007	HMDB0001068	3418	C05382	54827.2	54504	51917	33117.4	36600.6	33027.9	51142.5	53167.1	52971.6	ko00030,ko01100,ko01110,ko01200,ko01230,ko01250	1.29543	0.00027692	0.637191	-0.650202	down
T3_negative	MEDN1244	4-(Cytidine 5'-diphosphate)-2-C-methyl-D-erythritol	Nucleotide and Its metabolites	Nucleotide and Its metabolites	C14H25N3O14P2	558.022	521.081	1.3223	[M+K-2H]-	14.4795	3	0.568	rp	263016-94-0	443199	HMDB0304166	-	C11435	12536.9	13204.2	15810.3	2297.92	3639.64	3662.95	7836.8	7826.06	7911.43	ko00900,ko01100,ko01110	1.28019	0.00314108	0.231051	-2.11372	down
T3_negative	MW0151260	(Hydroxymethyl)phosphonic acid	Organic acid and Its derivatives	Organic acid and Its derivatives	CH5O4P	110.985	111.993	0.7646	[M-H]-	1.072	3	0.6886	rp	2617-47-2	75795	-	-	C06455	8787.87	9817.41	20387.6	41305.8	35057	37305.5	24336.7	22121.7	18730.7	ko00440,ko01110	1.18819	0.0099276	2.91511	1.54355	up
T3_negative	MW0103685	Uridine diphosphate glucuronic acid	Nucleotide and Its metabolites	Nucleotide and Its metabolites	C15H22N2O18P2	601.008	580.034	1.3639	[M+Na-2H]-	1.48084	2	0.9566	rp	2616-64-0	17473	HMDB0000935	-	C00167	24337.8	24144.6	17355.1	9312.79	4018.76	6920.81	22399.8	22431.3	21919.7	ko00040,ko00053,ko00520,ko01100,ko01240,ko01250	1.19687	0.00786321	0.307611	-1.70082	down
T3_negative	MEDL02773	Indoleacetaldehyde	Heterocyclic compounds	Indole and Its derivatives	C10H9NO	158.061	159.068	2.4661	[M-H]-	0.275	3	0.7895	rp	2591-98-2	800	HMDB0001190	6068	C00637	1118.17	1068.3	709.51	3917.68	4339.77	5011.49	2465.61	2409.28	2471.75	ko00380,ko01100	1.28406	0.00355368	4.58185	2.19593	up
T3_negative	MW0063386	Bovinic acid	FA	Oxidized lipids	C18H32O2	279.233	280.24	6.9625	[M-H]-	0.675	3	0.8597	rp	2540-56-9	5280644	HMDB0003797	-	C04056	1970.29	3558.6	2703.46	10711.2	7257.77	11009.8	8630.42	10075.3	8793.59	-	1.24332	0.018619	3.52011	1.81562	up
T3_negative	MEDP0401	5'-Deoxy-5'-(Methylthio) Adenosine	Nucleotide and Its metabolites	Nucleotide and Its metabolites	C11H15N5O3S	296.083	297.09	2.8047	[M-H]-	0.919104	2	0.9757	rp	2457-80-9	439176	HMDB0001173	3425	C00170	239377	229542	208319	737650	772425	678334	541171	542821	540092	ko00270,ko01100	1.30567	0.00128115	3.23137	1.69215	up
T3_negative	MW0110092	Trp-Ala	Amino acid and Its metabolites	Small Peptide	C14H17N3O3	396.127	275.127	2.3725	[M-H]-	10.3867	3	0.7598	rp	24046-71-7	6993401	HMDB0029076	23758	-	17359.3	17084	14909.2	2330.96	2492.82	2397.99	7173.87	7156.38	7069.43	-	1.31037	0.00294307	0.14633	-2.7727	down
T3_negative	MW0013179	2,9-Bis(3-methyl-2E-pentenoyl)-2b,9a-dihydroxy-4Z,10(14)-oplopadien-3-one	Aldehyde,Ketones,Esters	Esters	C27H38O5	441.265	442.272	7.6133	[M-H]-	1.00039	3	0.7127	rp	237407-03-3	131751520	HMDB0034065	-	-	4424.44	6557.31	5725.92	7928.85	10622.9	9581.44	7869	8205.24	8323.91	-	1.14945	0.0208563	1.68385	0.751764	up
T3_negative	MEDN1425	tetranor-PGFM	Hormones and hormone related compounds	Hormones and hormone related compounds	C16H26O7	311.159	330.168	2.2707	[M-H2O-H]-	22.7387	1b	0.6076	rp	23109-94-6	3246853	-	36188	-	732.45	919.25	519.56	4803.8	4040.79	4557.67	2055.71	1927.41	1966.09	-	1.28995	0.000684368	6.17257	2.62587	up
T3_negative	MW0015833	Anthranoyllycoctonine	Benzene and substituted derivatives	Benzene and substituted derivatives	C32H46N2O8	585.325	586.325	2.9102	[M-H]-	15.2724	3	0.7011	rp	22413-78-1	441708	-	-	C08659	1901.61	2596.64	1637.16	6233.6	3639.2	4735.89	3278.74	3280.62	3238.77	-	1.1864	0.0499295	2.38105	1.2516	up
T3_negative	MW0157273	Sucrose-6-phosphate	Organic acid and Its derivatives	Organic acid and Its derivatives	C12H23O14P	481.102	422.082	3.1761	[M+CH3COO]-	9.72537	3	0.6856	rp	22372-29-8	644101	-	-	-	7021.45	7586.15	6286.13	18772.1	18988.2	19678.3	10189.3	10171.3	10345.4	-	1.30408	2.73986e-05	2.74908	1.45895	up
T3_negative	MW0008725	N-[4-[(4-propan-2-yloxyphenyl)methyl]phenyl]-4,5-dihydro-1H-imidazol-2-amine	Benzene and substituted derivatives	Benzene and substituted derivatives	C19H23N3O	308.178	309.184	5.6729	[M-H]-	2.27967	3	0.7601	rp	221529-58-4	9839644	-	44898	C74126	8328.77	9383.01	7001.72	6153.3	5501.12	5068	6108.94	6101.1	6101.14	-	1.16028	0.0434387	0.676651	-0.563516	down
T3_negative	MW0130384	Mucronustyrene	Benzene and substituted derivatives	Benzene and substituted derivatives	C17H18O3	269.122	270.126	8.2951	[M-H]-	5.06651	3	0.7887	rp	21148-34-5	12312982	HMDB0130347	-	-	4690.87	4304.22	4869.47	3688.29	2771.27	3495.23	3821.06	3821.52	3696.82	-	1.13867	0.0237286	0.718003	-0.477939	down
T3_negative	MEDN0659	Pyrophosphate	Organic acid and Its derivatives	Phosphoric acids	H4O7P2	176.936	177.943	0.7524	[M-H]-	0.178928	2	0.9602	rp	206975	644102	HMDB0000250	-	C00013	188616	140794	178517	3937.55	8338.72	50936	129705	128135	128282	ko00190	1.13555	0.00208945	0.124452	-3.00634	down
T3_negative	MW0103342	2'-Deoxycytidine-5'-triphosphate	Nucleotide and Its metabolites	Nucleotide and Its metabolites	C9H16N3O13P3	466.997	466.99	1.1998	[M-]-	11.7029	3	0.7174	rp	2056-98-6	65091	HMDB0000998	5929	C00458	17173	17670.2	17477.6	10896.5	7926.43	12324.9	12637.6	13194.2	13195.6	ko00240,ko01100,ko01232	1.173	0.030755	0.595325	-0.748251	down
T3_negative	MW0127095	Amifostine	Others	Others	C5H15N2O3PS	214.049	214.054	0.7012	[M-]-	14.1507	2	0.8148	rp	20537-88-6	2141	HMDB0015274	-	C06819	739142	1.07277e+06	952830	1.72419e+06	2.01946e+06	2.16759e+06	1.92553e+06	1.95004e+06	1.94661e+06	-	1.24308	0.00386819	2.13807	1.09631	up
T3_negative	MW0153327	Makisterone B	Steroids	Steroid	C28H46O7	493.308	494.324	6.2791	[M-H]-	21.612	3	0.5775	rp	20512-31-6	441830	-	-	C08829	419591	429631	394462	349298	308831	276309	410601	399787	406234	-	1.1735	0.023261	0.751347	-0.412448	down
T3_negative	MW0126536	Semaxanib	Heterocyclic compounds	Heterocyclic compounds	C15H14N2O	237.111	238.111	5.336	[M-H]-	18.6434	3	0.7752	rp	204005-46-9 | 194413-58-6	5329098	-	45544	-	558.2	637.2	375.14	107.49	310.81	224.28	1997.6	1982.1	2038.11	-	1.0623	0.0371688	0.409146	-1.28931	down
T3_negative	MW0159449	Zephyranthine	Alkaloids	Alkaloids	C16H19NO4	288.12	289.131	0.7866	[M-H]-	11.3413	3	0.7498	rp	2030-55-9	193339	-	-	-	76176.6	75224.1	72272.7	235289	215128	211476	124156	123487	124245	-	1.30937	0.00208055	2.95919	1.5652	up
T3_negative	MW0054658	Makisterone A	Aldehyde,Ketones,Esters	Ketones	C28H46O7	493.308	494.324	5.6904	[M-H]-	19.5052	3	0.6407	rp	20137-14-8	12312690	-	-	C16874	52106.7	57250.3	49742.2	43179.8	43350.6	33274.8	34868.5	32387.1	33622.3	-	1.09274	0.0375955	0.753022	-0.409237	down
T3_negative	MW0110866	5-Acetylamino-6-amino-3-methyluracil	Heterocyclic compounds	Heterocyclic compounds	C7H10N4O3	235.023	198.075	1.648	[M+K-2H]-	3.475	3	0.6955	rp	19893-78-8	88299	HMDB0004400	-	C16366	73327.3	74834.4	79929.6	92174.8	96360.1	98699.1	73448.4	73454.7	73762.7	-	1.2616	0.00205553	1.25929	0.332615	up
T3_negative	MW0151726	1-O-Indol-3-ylacetyl-beta-D-glucose	Heterocyclic compounds	Indole and Its derivatives	C16H19NO7	336.106	337.116	2.3674	[M-H]-	7.125	3	0.7935	rp	19817-95-9	440255	-	-	C04197	5978.7	5661.35	4872.42	461.37	213.03	711.04	2311.65	2311.07	2292.38	-	1.26229	0.00124459	0.0839027	-3.57514	down
T3_negative	MW0153824	Paraquat dichloride	Heterocyclic compounds	Heterocyclic compounds	C12H14Cl2N2	255.052	256.053	3.7599	[M-H]-	16.6631	3	0.6253	rp	1910-42-5	15938	HMDB0033121	-	C00225	1260.38	1390.03	840.28	3044.29	4393.93	3949.3	2147.55	2019.18	2200.62	-	1.24957	0.0121164	3.26225	1.70587	up
T3_negative	MW0146662	4-O-beta-D-mannopyranosyl-N-acetyl-D-glucosamine	Alcohol and amines	Amines	C14H25NO11	418.12	383.143	1.1913	[M+Cl]-	18.0334	3	0.6649	rp	186765-90-2	71297235	-	-	C20887	500.67	342.99	2502.87	19116.3	9604.57	20063	10036.7	9844.65	10026	-	1.20543	0.0404277	14.5775	3.86567	up
T3_negative	MW0054404	Loganin	Heterocyclic compounds	Heterocyclic compounds	C17H26O10	389.149	390.153	2.8571	[M-H]-	9.25	3	0.5891	rp	18524-94-2	87691	-	64938	C01433	4711.57	4843.06	3822.68	2567.31	2079.14	2095.81	2681.26	2703.43	2680.55	ko01100,ko01110	1.25661	0.00908082	0.504007	-0.988484	down
T3_negative	MW0123741	Indole-3-lactic acid	Heterocyclic compounds	Indole and Its derivatives	C11H11NO3	204.066	205.074	4.114	[M-H]-	0.225	3	0.7941	rp	1821-52-9 | 832-97-3	92904	HMDB0000671	71	C02043	290.88	372.1	895.56	4255.11	4490.06	4552.35	1452.05	1519.38	1492.33	-	1.25614	0.00044189	8.53204	3.09289	up
T3_negative	MW0194046	1,2-Dimyristoyl-sn-glycero-3-phosphocholine	GP	PC	C36H72NO8P	722.508	677.5	7.2209	[M+HCOO]-	7.60145	3	0.6007	rp	18194-24-6	5459377	HMDB0007866	-	C00157	3709.97	3503	3504.58	2495.34	2257.87	2329.73	3552.61	3430.05	3523.18	ko00564,ko00590,ko00592,ko01100,ko01110	1.2925	0.000249956	0.660873	-0.597555	down
T3_negative	MW0111665	1,1'-(Tetrahydro-6a-hydroxy-2,3a,5-trimethylfuro[2,3-d]-1,3-dioxole-2,5-diyl)bis-ethanone	Aldehyde,Ketones,Esters	Ketones	C12H18O6	257.101	258.11	2.7161	[M-H]-	4.66526	3	0.6915	rp	18114-49-3	193527	HMDB0032527	-	-	2869.2	3023.77	2767.75	27.38	71.31	209.97	992.39	1047.84	1007.29	-	1.24916	1.53178e-05	0.0356391	-4.8104	down
T3_negative	MW0106249	Cys-Cys	Amino acid and Its metabolites	Small Peptide	C6H12N2O3S2	223.027	224.029	1.4919	[M-H]-	16.0253	3	0.6151	rp	18048-87-8	152238	HMDB0028772	23996	-	45093.7	32745.8	34937.6	66650.4	60175.1	67549.1	57112.7	55958.4	56287.2	-	1.22888	0.0066112	1.72353	0.785366	up
T3_negative	MEDP1547	Sodium 1-hydroxy-3-(phosphonooxy)propan-2-olate	Organic acid and Its derivatives	Phosphoric acids	C3H8NaO6P	171.006	193.996	0.7462	[M-H]-	0.946098	3	0.5939	rp	17603-42-8	71607255	-	-	-	455461	520058	424153	64398.1	92565.7	75041.8	265312	264064	264688	-	1.30158	0.00300091	0.165757	-2.59286	down
T3_negative	MW0013101	2,3-Dihydroxy-3-methylbutanoic acid	Organic acid and Its derivatives	Organic acid and Its derivatives	C5H10O4	174.077	134.058	1.2784	[M-H+CH3CN]-	1.175	3	0.8407	rp	1756-18-9	677	-	-	C04039	9055.24	8781.35	6463.23	361.06	1179.89	299.67	2987.63	3022.21	2979.6	-	1.25266	0.00668339	0.0757462	-3.72268	down
T3_negative	MW0147086	Carbestrol	Benzene and substituted derivatives	Phenolics	C17H22O3	255.135	274.157	3.5035	[M-H2O-H]-	12.7949	3	0.5586	rp	1755-52-8	15644	-	-	-	1169.53	1075.39	979.29	5745.2	6292.63	5958.5	3143.75	3083.52	3143.52	-	1.30885	0.000336958	5.58162	2.48069	up
T3_negative	MW0142428	alpha-(Hydroxymethyl)serine	Organic acid and Its derivatives	Organic acid and Its derivatives	C4H9NO4	134.047	135.053	2.8047	[M-H]-	2.71685	3	0.6561	rp	17149-11-0	439893	-	-	C03059	94975.2	96552.2	88370.7	312208	324748	285882	225728	224527	224693	-	1.30768	0.00194614	3.29705	1.72118	up
T3_negative	MEDP2280	CCT-018159	Benzene and substituted derivatives	Benzene and substituted derivatives	C20H20N2O4	351.132	352.142	1.9568	[M-H]-	6.98823	1b	0.7609	rp	171009-07-7	984170	-	45356	-	21508	23407.9	12984.5	110784	97539	86808.1	34531.6	34654.9	34578	-	1.27649	0.0025157	5.09723	2.34971	up
T3_negative	MW0107335	Histidylalanine	Amino acid and Its metabolites	Small Peptide	C9H14N4O3	261.073	226.107	0.7834	[M+Cl]-	2.17382	3	0.7258	rp	16874-75-2	101180	HMDB0028878	-	-	10259.4	16457.1	10715.9	103056	79525.7	89507.8	38567.6	39774.2	38777.6	-	1.29454	0.00456146	7.26884	2.86172	up
T3_negative	MW0161294	S-nitroso-L-cysteinylglycine	Organic acid and Its derivatives	Organic acid and Its derivatives	C5H9N3O4S	206.022	207.031	1.3453	[M-H]-	4.7	3	0.6437	rp	162758-33-0	9942496	-	-	-	20485.9	20210	20749.8	8210.9	7647.54	6021.63	12456.9	12505.6	12872.5	-	1.29152	0.00155773	0.356087	-1.4897	down
T3_negative	MW0111040	Fingolimod hydrochloride	Others	Medicine	C19H34ClNO2	306.244	343.228	8.7551	[M-H]-	0.725262	3	0.7522	rp	162359-56-0	107969	-	44920	-	10.53	450.23	28.45	1463.12	2319.43	1733.62	837.28	835.05	804.03	-	1.10671	0.00890034	11.2757	3.49514	up
T3_negative	MW0116246	1-((4-Methylsulfonyl)phenyl)-3-trifluoromethyl-5-(4-fluorophenyl)pyrazole	Heterocyclic compounds	Heterocyclic compounds	C17H12F4N2O2S	443.074	384.056	2.4687	[M+CH3COO]-	10.1254	3	0.6656	rp	162054-19-5	115239	-	64855	-	5194.96	8803.72	4950.61	14087.4	14196.5	15034.7	11013.3	11078.1	10845.9	-	1.20526	0.0181972	2.28603	1.19284	up
T3_negative	MW0137347	Amentoflavone	Flavonoids	Flavonoid	C30H18O10	597.107	538.09	4.4677	[M+CH3COO]-	0.300396	3	0.6166	rp	1617-53-4	5281600	HMDB0030832	-	C10018	6378.76	5243.66	5832.35	3951.55	5044.58	4532.67	5573.19	5394.6	5504.91	-	1.07583	0.0452898	0.775078	-0.367587	down
T3_negative	MW0009687	[4-({6-[Allyl(methyl)amino]hexyl}oxy)-2-fluorophenyl](4-bromophenyl)methanone	Benzene and substituted derivatives	Benzene and substituted derivatives	C23H27BrFNO2	446.112	449.119	1.2872	[M-H]-	5.24378	3	0.6506	rp	161582-11-2	1949	-	44928	-	49880.8	59530.2	41087.6	235028	221332	219993	93250.5	95030.2	95168.4	-	1.29877	1.81764e-05	4.49408	2.16803	up
T3_negative	MEDN1410	N-Palmitoylglycine	Amino acid and Its metabolites	Amino acid derivatives	C18H35NO3	312.254	313.262	8.7463	[M-H]-	2.86928	1b	0.7373	rp	158305-64-7	151008	HMDB0013034	-	-	103.47	280.97	209.05	3790.42	5838.52	3700.98	1677.81	1680.53	1660.97	-	1.28341	0.0254557	22.4602	4.4893	up
T3_negative	MEDN1477	Mannitol 1-phosphate	Carbohydrates and Its metabolites	Phosphate sugars	C6H15O9P	261.041	262.045	2.4622	[M-H]-	6.39294	3	0.6668	rp	15806-48-1	130418	HMDB0001530	-	C00644	2954.41	2479.91	2388.5	12062.3	9046.17	9113.23	8082.47	8095.12	7913.44	ko00051,ko01100	1.29414	0.015038	3.86328	1.94983	up
T3_negative	MEDP1654	1-Methyladenosine	Nucleotide and Its metabolites	Nucleotide and Its metabolites	C11H15N5O4	281.111	281.112	0.9068	[M-]-	3.20212	3	0.6986	rp	15763-06-1	27476	HMDB0003331	6888	C02494	274897	275349	270530	235686	214906	215848	211561	212338	213603	-	1.25763	0.0134632	0.811963	-0.300513	down
T3_negative	MW0009821	Sulpiride	Benzene and substituted derivatives	Benzene and substituted derivatives	C15H23N3O4S	386.133	341.141	2.7161	[M+HCOO]-	11.072	3	0.698	rp	15676-16-1	5355	HMDB0014535	-	-	2061.98	1992.79	1641.81	269.41	285.26	270.15	745.59	759.48	782.41	-	1.30852	0.00628905	0.144792	-2.78794	down
T3_negative	MW0159345	Vicianin	Heterocyclic compounds	Heterocyclic compounds	C19H25NO10	464.103	427.148	2.2846	[M+K-2H]-	13.2516	3	0.7635	rp	155-57-7	656493	-	-	C01870	32887.8	35438.9	30817.4	105015	96039.1	98697.5	62204.9	62243.2	61383.7	-	1.3075	0.000217018	3.02339	1.59617	up
T3_negative	MEDN0227	D-Glucose 6-Phosphate	Carbohydrates and Its metabolites	Phosphate sugars	C6H13O9P	260.026	260.03	1.1055	[M-]-	10.4572	2	0.9222	rp	15209-11-7	439284	HMDB0304534	-	-	28483.5	31683.1	35273.2	12242.3	13100.1	10568.1	23610.4	24073	24266	-	1.29196	0.00463579	0.376264	-1.41018	down
T3_negative	MW0138088	Epothilone B	Aldehyde,Ketones,Esters	Ketones	C27H41NO6S	506.246	507.265	4.2993	[M-H]-	21.6243	3	0.6095	rp	152044-54-7	448013	-	41006	-	133.21	65.12	512.15	6135.63	4390.51	4653.14	2134.4	2167.82	2224.33	-	1.23537	0.00900211	21.3648	4.41717	up
T3_negative	MW0103552	Edoxudine	Nucleotide and Its metabolites	Nucleotide and Its metabolites	C11H16N2O5	315.119	256.106	1.8424	[M+CH3COO]-	2.61095	3	0.7373	rp	15176-29-1 | 69264-36-4	66377	-	44641	-	1966.96	2175.88	2811.22	14120	12191.9	12527.8	7077.53	7190.14	7139.46	-	1.30094	0.000865337	5.58518	2.4816	up
T3_negative	MW0161649	(1R,10R,12S,17R)-5-amino-11,11,14-trihydroxy-14-oxo-13,15,18-trioxa-2,4,6,9-tetraza-14lambda5-phosphatetracyclo[8.8.0.03,8.012,17]octadeca-3(8),5-dien-7-one	Others	Others	C10H14N5O8P	384.032	363.058	0.8013	[M+Na-2H]-	2	2	0.9726	rp	150829-29-1	16061579	HMDB0059639	-	C18239	33144	38137.7	27236.2	20038.2	21951.8	15995.6	16874.8	17685.1	16635.3	ko00790,ko01100,ko01240,ko04122	1.16992	0.0308204	0.588579	-0.764691	down
T3_negative	FDATN01472	Disodium succinate	Others	Medicine	C4H4Na2O4	117.02	161.99	1.3397	[M-H]-	0.672811	2	0.9898	rp	150-90-3 | 14047-56-4	9020	-	-	-	299918	328032	268500	712774	838672	720766	431858	429441	428833	-	1.29281	0.00301621	2.53468	1.3418	up
T3_negative	MW0138171	Alvocidib	Heterocyclic compounds	Heterocyclic compounds	C21H20ClNO5	382.075	401.103	2.4335	[M-H2O-H]-	24.4448	3	0.5943	rp	146426-40-6 | 131740-09-5	5287969	-	-	-	8904.69	8364.68	7784.08	5016.01	3139.36	3654.82	6490.48	6519.05	6496.31	-	1.22683	0.00520255	0.4714	-1.08498	down
T3_negative	MW0055187	Myrsinone	Aldehyde,Ketones,Esters	Ketones	C17H26O4	293.179	294.183	8.7638	[M-H]-	4.30071	3	0.6739	rp	145040-57-9	137177207	HMDB0040646	-	-	35377.9	43106.4	65958.3	114855	154446	124635	93785	95917.1	94767.3	-	1.21843	0.00626095	2.72729	1.44747	up
T3_negative	MW0107034	Gluten Exorphin C	Amino acid and Its metabolites	polypeptide	C29H45N5O8	648.378	591.327	5.0521	[M-H2O-H]-	9.30202	3	0.5223	rp	142479-62-7	25221466	HMDB0059796	-	-	208.92	67.38	40.33	5604.21	4397.6	3280.54	1070.16	1136.48	1040.65	-	1.27054	0.022705	41.9491	5.39057	up
T3_negative	MW0143509	Hydroxanthommatin	Heterocyclic compounds	Heterocyclic compounds	C20H15N3O8	484.089	425.086	2.2846	[M+CH3COO]-	21.2655	3	0.566	rp	142394-84-1 | 25705-16-2	5459828	-	-	C03476	1363.39	2205.06	1387.88	6797.71	5931.59	6969.49	3784.18	3698.12	3734.41	-	1.27783	0.00035678	3.97447	1.99076	up
T3_negative	MW0145623	Kenpaullone	Organic acid and Its derivatives	Organic acid and Its derivatives	C16H11BrN2O	324.991	326.005	1.2345	[M-H]-	20.4163	3	0.6483	rp	142273-20-9	3820	-	44866	-	318.94	400.4	280.37	16305.2	19078.8	21060.6	14954.5	15041.5	14867.7	-	1.30936	0.00549718	56.4609	5.81918	up
T3_negative	MW0006945	D-Vacciniin	Benzene and substituted derivatives	Benzene and substituted derivatives	C13H16O7	265.078	284.09	1.3397	[M-H2O-H]-	15.2553	3	0.758	rp	14200-76-1	12444645	HMDB0038492	-	-	25653.4	24423.4	21571.9	6196.98	6071.99	6764.41	10597.9	10609.9	10413.8	-	1.30623	0.0037959	0.265649	-1.91241	down
T3_negative	MW0160780	Fumarate	Organic acid and Its derivatives	Organic acid and Its derivatives	C4H2O4-2	115.004	113.995	1.1656	[M-H]-	0.1	3	0.7058	rp	142-42-7	5460307	-	-	-	84709.2	95462.1	85411.1	161435	136264	147754	111871	112288	111877	-	1.27712	0.00586977	1.67727	0.746117	up
T3_negative	MW0137548	Caffeic aldehyde	Aldehyde,Ketones,Esters	Aldehydes	C9H8O3	216.049	164.047	3.53	[M+Cl+NH3]-	13.775	3	0.5256	rp	141632-15-7 | 68149-78-0	5281871	HMDB0141767	-	-	578.86	506.5	723.54	1928.62	1756.57	1238.59	1145.6	1076.56	1142.22	-	1.24087	0.0289265	2.72197	1.44465	up
T3_negative	MEDN0732	12-HOME	FA	Oxidized lipids	C18H34O3	297.243	298.251	8.7463	[M-H]-	4.72263	1b	0.7069	rp	141-22-0	5312769	HMDB0034297	-	C08365	744.79	1081.61	933.31	5476.69	6850.27	6285.53	3671.91	3681.92	3694.88	-	1.3002	0.00382218	6.74436	2.75368	up
T3_negative	MW0012229	12-Hydroxyjasmonic acid	FA	Oxidized lipids	C12H18O4	207.106	226.12	4.6258	[M-H2O-H]-	5.90639	2	0.9209	rp	140631-27-2	5497122	-	-	C21385 | C21669	8922.66	9582.62	10247.3	6571.39	6960.23	5986.06	2276.57	2191.72	2213.25	-	1.2561	0.0038807	0.678816	-0.558908	down
T3_negative	MW0123208	Capsazepine	Heterocyclic compounds	Heterocyclic compounds	C19H21ClN2O2S	375.094	376.101	2.4157	[M-H]-	4.77611	3	0.7453	rp	138977-28-3	2733484	-	45065	-	9359.82	9494.91	9445.84	7220.66	6980.79	7456.82	8511.65	8732.79	8740.72	-	1.29723	0.00212006	0.765294	-0.385913	down
T3_negative	MW0053985	Hydroxyisocaproic acid	Amino acid and Its metabolites	Amino acids	C6H12O3	131.071	132.079	3.5123	[M-H]-	0.15	3	0.7531	rp	13748-90-8	83697	HMDB0000746	5714	-	8643.05	8252.76	9538.49	13105.2	13581.9	10689.9	8567.19	8515.75	8524.11	-	1.17087	0.0396117	1.41396	0.499742	up
T3_negative	FDATN00665	Diacerein	Benzene and substituted derivatives	Benzene and substituted derivatives	C19H12O8	367.047	368.053	1.6487	[M-H]-	20.6365	3	0.5733	rp	13739-02-1 | 112118-18-0	26248	-	44094	-	2425.52	1074.29	2024.22	64290.6	65252	63373.1	58607.6	58277.4	58382.7	-	1.29995	2.45783e-07	34.923	5.12611	up
T3_negative	MW0116684	Hv-NCC-1	Heterocyclic compounds	Heterocyclic compounds	C35H42N4O10	677.265	678.29	3.052	[M-H]-	24.8247	3	0.5461	rp	135972-64-4	15088501	HMDB0039005	-	-	271.45	653.56	17.67	7036.33	4378.03	4491.07	2628.37	2694.96	2674.17	-	1.1175	0.0247825	16.8726	4.07661	up
T3_negative	MW0141324	12alpha-Hydroxy-3-oxochola-4,6-dien-24-oic Acid	Aldehyde,Ketones,Esters	Esters	C24H34O4	445.254	386.246	8.9419	[M+CH3COO]-	10.2355	3	0.5714	rp	13535-96-1	166839	-	-	-	1115.07	130.79	472.02	49430.1	86881.7	50695.6	31927.9	29943.7	31544.5	-	1.26909	0.0372574	108.859	6.76632	up
T3_negative	MW0002596	(2-Methoxy-benzoylamino)-acetic acid	Benzene and substituted derivatives	Benzene and substituted derivatives	C10H11NO4	208.064	209.069	4.4677	[M-H]-	6.40523	3	0.7245	rp	13443-58-8	791250	HMDB0126552	-	-	194163	187493	173018	138808	156177	165811	156909	153734	154973	-	1.09276	0.0385755	0.830752	-0.26751	down
T3_negative	MW0158310	H-Trp-ser-OH	Amino acid and Its metabolites	Small Peptide	C14H17N3O4	290.117	291.122	2.4335	[M-H]-	4.63709	3	0.7703	rp	133101-40-3	7009660	-	65152	-	135006	137391	127310	104524	95443.9	102215	109792	109475	108904	-	1.2694	0.0014177	0.756012	-0.40352	down
T3_negative	MW0114177	Arabinose-5-phosphate	Carbohydrates and Its metabolites	Phosphate sugars	C5H11O8P	229.012	230.019	1.114	[M-H]-	1.1549	2	0.9414	rp	13137-52-5	188324	HMDB0011734	-	C01112	28625.2	27776.4	21630.9	13988.8	19581	16637	25922	26018.8	26338.5	ko01100,ko01250	1.13139	0.0313505	0.64341	-0.636189	down
T3_negative	MW0148782	dTDP-L-oleandrose	Nucleotide and Its metabolites	Nucleotide and Its metabolites	C17H28N2O14P2	545.104	546.102	1.2872	[M-H]-	12.2596	3	0.6194	rp	130832-66-5	195671	-	-	-	4257.94	5209.8	4220.88	10807.4	12327.8	9712.76	5400.26	5426.13	5292.19	-	1.27943	0.00638768	2.39965	1.26283	up
T3_negative	MW0103443	Acetyl adenylate	Nucleotide and Its metabolites	Nucleotide and Its metabolites	C12H16N5O8P	441.072	389.074	1.2696	[M+Cl+NH3]-	5.2146	3	0.7933	rp	13015-87-7	440867	HMDB0006880	-	C05993	43361	45097.1	38968.4	48269.9	51575.4	51445.9	38837.3	38872.4	38245.8	ko00230,ko00620,ko01100	1.14187	0.0287701	1.18728	0.247664	up
T3_negative	MW0143638	5-Hydroxymethyldeoxycytidylic acid	Nucleotide and Its metabolites	Nucleotide and Its metabolites	C10H16N3O8P	337.07	337.067	1.5109	[M-]-	6.27608	3	0.6175	rp	13009-95-5	440189	-	-	C03997	1287.58	1545.76	1827.65	3754.44	3608.42	3822.69	2091.62	2027.81	2230.56	ko00240	1.2786	0.00184712	2.39982	1.26293	up
T3_negative	MW0111208	Nevirapine	Heterocyclic compounds	Heterocyclic compounds	C15H14N4O	265.119	266.117	2.5217	[M-H]-	22.1505	3	0.5468	rp	129618-40-2	4463	HMDB0014383	-	C07263	15843.1	15755.2	13677.8	6168.47	5724.56	3092.79	8490.17	8285.11	8489	-	1.22344	0.00153055	0.330988	-1.59515	down
T3_negative	MW0121578	N-(2-(4-Bromocinnamylamino)ethyl)-5-isoquinolinesulfonamide	Alcohol and amines	Amines	C20H20BrN3O2S	444.041	447.044	2.5217	[M-H]-	1.00796	3	0.7541	rp	127243-85-0	449241	-	45279	-	8769.09	10360.4	8450.87	7061.32	6275.92	6421.45	7645.16	7654.9	7515.32	-	1.20084	0.0334467	0.716404	-0.481154	down
T3_negative	MEDN0204	Pyruvic Acid	Organic acid and Its derivatives	Organic acid and Its derivatives	C3H4O3	147.03	88.016	0.8038	[M+CH3COO]-	0.16362	1a	0.8862	rp	127-17-3	1060	HMDB0000243	-	C00022	51249.8	48034.1	32054	81913.9	65666.8	69439	49642.8	49982.4	49973.8	ko00010,ko00020,ko00030,ko00040,ko00053,ko00250,ko00260,ko00261,ko00270,ko00290,ko00330,ko00350,ko00360,ko00430,ko00440,ko00470,ko00620,ko00630,ko00650,ko00660,ko00680,ko00730,ko00760,ko00770,ko00785,ko00900,ko01100,ko01110,ko01200,ko01210,ko01230,ko01240	1.11579	0.0219978	1.65238	0.724542	up
T3_negative	MW0159994	Citrate	Organic acid and Its derivatives	Organic acid and Its derivatives	C6H5O7-3	173.009	189.004	0.8038	[M-H2O-H]-	0	2	0.961	rp	126-44-3 | 2572-63-6	31348	-	-	-	44267.4	43350.3	25885.9	104815	96635.5	94223	73191.4	71288.6	72903.9	-	1.23385	0.00271626	2.60497	1.38127	up
T3_negative	MW0107859	Levulinic acid	Organic acid and Its derivatives	Organic acid and Its derivatives	C5H8O3	115.04	116.047	2.0097	[M-H]-	0.15	3	0.6187	rp	123-76-2	11579	HMDB0000720	2195	-	3486.08	4323.72	3563.5	6736.98	6617.36	6564.14	4280.23	4294.4	4113.49	-	1.27484	0.0070352	1.75134	0.808457	up
T3_negative	MW0168601	4-Hydroxybenzaldehyde	Benzene and substituted derivatives	Benzene and substituted derivatives	C7H6O2	121.029	122.037	3.7046	[M-H]-	0.816789	2	0.9717	rp	123-08-0	126	HMDB0011718	-	C00633	2316.71	2427.37	1717.73	4983.8	4835.03	4584.9	3332.66	3636.8	3365.74	ko01100	1.26554	0.00169507	2.22906	1.15643	up
T3_negative	MW0009692	Rosiglitazone	Benzene and substituted derivatives	Phenolics	C18H19N3O3S	357.114	357.115	4.4677	[M-]-	5.84524	3	0.7369	rp	122320-73-4	77999	HMDB0005031	-	-	47995.8	46867.6	43325.2	33182.9	33905.8	38930.9	22081.9	22035.4	21481.1	-	1.19937	0.0108607	0.76721	-0.382307	down
T3_negative	MW0147918	cyclic ADP-ribose	Carbohydrates and Its metabolites	Sugars	C15H21N5O13P2	540.054	541.061	1.1409	[M-H]-	0.47525	2	0.946	rp	119340-53-3	123847	-	-	-	833739	895308	731294	1.10981e+06	1.07818e+06	988410	796479	791702	794040	-	1.15717	0.0188748	1.29104	0.368534	up
T3_negative	MW0110487	Zoledronic acid	Organic acid and Its derivatives	Organic acid and Its derivatives	C5H10N2O7P2	331.01	271.996	1.6751	[M+CH3COO]-	2.89902	3	0.7642	rp	118072-93-8	68740	HMDB0014543	-	-	9119.69	7410.02	8001.76	15001.2	13956.7	11249.1	8438.18	8066.09	8469.77	-	1.20455	0.0276564	1.639	0.712813	up
T3_negative	MW0009286	2-Methylbenzoic acid	Benzene and substituted derivatives	Phenolic acids	C8H8O2	135.053	136.052	1.1314	[M-H]-	9.5557	3	0.5648	rp	118-90-1	8373	HMDB0002340	-	C07215	138964	148104	132878	114783	114015	117422	115002	110327	115495	ko01100	1.24159	0.0258587	0.824442	-0.27851	down
T3_negative	MW0148930	APGPR Enterostatin	Amino acid and Its metabolites	Amino acid derivatives	C21H36N8O6	495.268	496.276	0.9755	[M-H]-	1.27815	2	0.9372	rp	117830-79-2	3082883	HMDB0006117	-	-	43191.2	46445.5	24603	79719.2	56895.5	64224.9	27079	26717.9	27460	-	1.04872	0.0392883	1.75805	0.813978	up
T3_negative	MW0107420	Ibandronic Acid	Organic acid and Its derivatives	Organic acid and Its derivatives	C9H23NO7P2	354.068	319.095	0.9068	[M+Cl]-	18.1691	3	0.513	rp	114084-78-5	60852	HMDB0014848	-	-	232926	243920	211615	299363	325843	382662	246627	206681	236898	-	1.20076	0.0359322	1.46394	0.54986	up
T3_negative	MW0122142	Ulifloxacin	Heterocyclic compounds	Heterocyclic compounds	C16H16FN3O3S	348.089	349.09	1.904	[M-H]-	17.6834	3	0.6693	rp	112984-60-8	124225	-	-	-	3436.51	2073.99	3688.1	12445.3	10934.3	10335.4	6533.56	6552.85	6577.04	-	1.26196	0.000668273	3.66523	1.8739	up
T3_negative	MW0109523	Raltitrexed	Others	FDA	C21H22N4O6S	457.119	458.126	1.1826	[M-H]-	0.522952	3	0.7532	rp	112887-68-0	135400182	HMDB0014438	-	-	26671.8	27682.8	27935.6	74889.5	69726.9	68072.4	53454.7	53463.8	53814.3	-	1.30935	0.00164813	2.58462	1.36995	up
T3_negative	MW0155528	phosphoribosyl-AMP	Nucleotide and Its metabolites	Nucleotide and Its metabolites	C15H23N5O14P2	580.043	559.072	1.1486	[M+Na-2H]-	5.98228	3	0.8404	rp	1109-75-7	11988267	HMDB0012276	-	C02741	2267.63	2820.29	3379.73	847.92	1256.9	525.38	1230.57	1167.53	1155.5	ko00340,ko01100,ko01110,ko01230	1.19701	0.0104426	0.310617	-1.68679	down
T3_negative	MW0150718	Hedamycin	Benzene and substituted derivatives	Benzene and substituted derivatives	C41H50N2O11	745.33	746.341	3.3884	[M-H]-	2.63874	3	0.7807	rp	11048-97-8	98033	-	-	-	5775.05	8067.38	4438.18	15714.6	12493.5	10859.2	7668.63	7555.99	7562.58	-	1.16274	0.0204177	2.13709	1.09565	up
T3_negative	MW0110471	Virginiamycin S1	Amino acid and Its metabolites	Amino acid derivatives	C43H49N7O10	822.365	823.354	3.052	[M-H]-	23.127	3	0.7489	rp	11006-76-1	122731	HMDB0030520	-	C11269	26.97	31.31	423.16	15122.3	9176.4	11029.5	4241.07	4259.93	4247.33	-	1.23668	0.0216119	73.3803	6.19732	up
T3_negative	MW0152690	Lilaline	Heterocyclic compounds	Heterocyclic compounds	C20H17NO7	382.091	383.101	0.7524	[M-H]-	14.1175	3	0.7861	rp	110011-49-9	5281826	-	-	-	30125	34167.1	14588.3	128125	76398.5	112935	10199.2	11348.5	10213.2	-	1.20766	0.0235221	4.02455	2.00883	up
T3_negative	MW0169880	Succinic acid	Organic acid and Its derivatives	Organic acid and Its derivatives	C4H6O4	117.019	118.027	0.9755	[M-H]-	1.06124	2	0.8307	rp	110-15-6	1110	HMDB0000254	-	C00042	22166	25108.9	28376.2	55928.8	80799.7	64305.1	61567.9	61458.7	61945.9	ko00020,ko00190,ko00250,ko00310,ko00350,ko00360,ko00620,ko00630,ko00640,ko00650,ko00760,ko00920,ko01100,ko01110,ko01200	1.26617	0.0238555	2.65738	1.41	up
T3_negative	MW0103486	Nicotinamide mononucleotide	Nucleotide and Its metabolites	Nucleotide and Its metabolites	C11H15N2O8P	334.062	334.057	1.105	[M-]-	13.25	3	0.6009	rp	1094-61-7	14180	HMDB0000229	4167	C00455	41026.6	45487.9	43813.6	83000.6	73160	86922.8	68488.7	69638.1	69578.8	ko00760,ko01100	1.29007	0.00709044	1.86517	0.899304	up
T3_negative	MW0106805	alpha-Gliadin (43-49)	Amino acid and Its metabolites	polypeptide	C43H57N9O11	874.394	875.418	3.3859	[M-H]-	19.5944	3	0.6076	rp	107936-65-2	130932	HMDB0059786	-	-	2467.7	1104.61	2682.68	5085.94	7356.47	4392.85	3186.42	3070.97	3088.49	-	1.1127	0.0386216	2.69149	1.42841	up
T3_negative	MW0148623	DL-|A-Hydroxybutyryl coenzyme A lithium salt	CoEnzyme and vitamins	CoEnzyme and vitamins	C25H42LiN7O18P3S	852.166	860.168	2.6631	[M-H]-	23.8053	3	0.7137	rp	103404-51-9	6419756	-	456	-	2771.03	1754.74	890.11	6865.08	3878.38	7627.66	3250.72	3234.05	3276.45	-	1.12291	0.0453503	3.39208	1.76217	up
T3_negative	MW0119310	3-[1-[(4-Chlorophenyl)methyl]-5-fluoro-3-methyl-2-indolyl]-2,2-dimethylpropanoic acid	Organic acid and Its derivatives	Organic acid and Its derivatives	C21H21ClFNO2	372.119	373.125	2.4335	[M-H]-	3.24844	3	0.7582	rp	103253-15-2	122070	-	45342	-	25279.6	24568.3	23411.4	19053.1	16919.3	17598	20556.4	20554.7	20358.4	-	1.2667	0.00152143	0.731243	-0.451578	down
T3_negative	MW0062144	Potassium canrenoate	Hormones and hormone related compounds	Hormones and hormone related compounds	C22H29KO4	357.214	396.17	2.9899	[M-H]-	15.4671	3	0.7119	rp	102731	23671691	-	-	-	334.15	95.17	193.21	2883.44	2064.37	1973.95	1031.77	1037.16	992.27	-	1.25588	0.014468	11.1188	3.47492	up
T3_negative	MW0126450	Riboflavin reduced	Heterocyclic compounds	Heterocyclic compounds	C15H16N4O6	369.082	348.107	1.904	[M+Na-2H]-	0.55	3	0.8657	rp	101652-10-2	22833571	HMDB0001557	6322	C01007	2749.85	3135.45	2826.59	6559.94	5453.9	4758.42	3064.45	2741.88	2856.1	ko00740,ko01100	1.25284	0.0309579	1.92521	0.945019	up
T3_negative	MEDN0589	Cyclamic acid	Organic acid and Its derivatives	Organic acid and Its derivatives	C6H13NO3S	357.12	179.062	3.7046	[2M-H]-	8.05691	1b	0.6817	rp	100-88-9	7533	HMDB0031340	-	C02824	21842.2	16910.2	14803.1	25769.6	30820.4	32640	22697.2	22674.5	23059.4	-	1.16379	0.0153428	1.66612	0.736496	up
T3_negative	MEDN1807	S-nitrosoglutathione	Amino acid and Its metabolites	Small Peptide	C10H16N4O7S	335.065	336.074	1.5159	[M-H]-	5.21986	1b	0.7082	rp	-	10404739	HMDB04645	-	-	43055.5	19728.2	46090.5	79894	88599.5	99673.7	75305.7	75271.4	75360.6	-	1.13493	0.00871785	2.46309	1.30047	up
T3_negative	MEDN0161	Guanosine 3',5'-Cyclic Monophosphate	Nucleotide and Its metabolites	Nucleotide and Its metabolites	C10H11N5O7P-	404.063	344.04	1.9568	[M+CH3COO]-	3.3934	1b	0.6482	rp	-	135398570	HMDB0001314	-	-	27051.1	28160.6	24508.6	42590.4	40916.5	39132.6	31498.9	31335.2	31249.6	-	1.28089	0.000646175	1.53837	0.621407	up
T3_negative	MW0113980	beta-D-Fructose 2-phosphate	Organic acid and Its derivatives	Organic acid and Its derivatives	C6H13O9P	300.049	260.03	0.7632	[M-H+CH3CN]-	0.4	2	0.9816	rp	-	193537	HMDB0006800	-	C03267	197706	222838	207864	136796	148560	145260	212833	212832	213062	ko00051,ko01100	1.28097	0.00452097	0.68525	-0.545297	down
T3_negative	MW0103901	(3R)-3-Hydroxy-2-oxo-4-phosphonooxybutanoate	Organic acid and Its derivatives	Organic acid and Its derivatives	C4H7O8P	234.962	213.988	1.1998	[M+Na-2H]-	1.625	2	0.9754	rp	-	21145142	HMDB0006801	-	C06054	10266.8	9723.54	10553.9	6626.04	6764.28	3944.66	11591	11582.2	11376.5	ko00750,ko01100,ko01240	1.1281	0.0336603	0.567538	-0.817212	down
T3_negative	MW0114809	D-Mannose 6-phosphate	Carbohydrates and Its metabolites	Phosphate sugars	C6H13O9P	259.023	260.03	1.114	[M-H]-	0.252891	2	0.9719	rp	-	65127	HMDB0304312	-	C00275	522510	463805	508712	182725	192790	170561	370341	381243	386360	ko00051,ko00520,ko01100,ko01110,ko01240,ko01250	1.30605	0.00119464	0.365262	-1.453	down
T3_negative	MW0014926	N-(6-Aminohexanoyl)-6-aminohexanoate	Benzene and substituted derivatives	Benzene and substituted derivatives	C12H24N2O3	243.172	244.179	2.7074	[M-H]-	0.525	2	0.9715	rp	-	5245705	-	-	-	793.83	3582.49	2659.52	23374.7	18251	18783.7	8160.79	8175.1	8099.38	-	1.21759	0.00242694	8.58596	3.10198	up
T3_negative	MW0154740	O-methylandrocymbine	Alkaloids	Alkaloids	C22H27NO5	437.184	385.189	3.7578	[M+Cl+NH3]-	1.3038	2	0.9714	rp	-	15286666	-	-	-	1657.59	2202.06	1098.88	7814.73	5221.02	5573.53	3216.85	3172.78	3080.83	-	1.23855	0.0193775	3.75298	1.90804	up
T3_negative	MW0195169	Glutathione Reducedform	Amino acid and Its metabolites	Small Peptide	C10H17N3O6S	611.145	307.084	1.1486	[M-H]-	0.835075	2	0.9668	rp	-	-	-	-	C00051	136878	126421	80575.6	225574	203161	196776	180341	179091	180162	ko00270,ko00480,ko01100,ko01240,ko02010	1.15167	0.0173162	1.81901	0.863151	up
T3_negative	MW0106726	(E)-but-2-enedioate;hydron	Organic acid and Its derivatives	Organic acid and Its derivatives	C4H4O4	115.004	116.011	0.952	[M-H]-	1.01093	2	0.9517	rp	-	21883788	HMDB0000134	-	-	21997.1	23995.7	17087.4	60036	57366.3	53588.1	26571.9	26872	26895.7	-	1.2833	0.000215637	2.71069	1.43866	up
T3_negative	MEDN1283	LPE(0:0/18:3)	GP	LPE	C23H42NO7P	474.261	475.27	6.756	[M-H]-	1.81026	2	0.9505	rp	-	53480928	HMDB0011478	-	C04438	3290.97	2088.58	3484.59	21911.2	38121.2	21728.7	10534.4	10079.3	10586.1	ko00564	1.27896	0.0457343	9.22379	3.20536	up
T3_negative	MW0103299	(-)-Neplanocin A	Nucleotide and Its metabolites	Nucleotide and Its metabolites	C11H13N5O3	308.099	263.102	2.3447	[M+HCOO]-	2.36392	2	0.9367	rp	-	490421	-	-	-	3412.33	3307.26	3173.16	5453.3	5672.94	5868.49	3497.78	3531.16	3647.43	-	1.30404	0.000297353	1.7179	0.780644	up
T3_negative	MW0149933	Glu-Asn-Lys-Asp	Amino acid and Its metabolites	Small Peptide	C19H32N6O10	503.213	504.218	2.8396	[M-H]-	3.69029	2	0.9031	rp	-	-	-	132042	-	57.74	1815.84	85.32	6777.15	6785.95	6721.2	4524.05	4571.15	4249.13	-	1.11208	0.00887713	10.3549	3.37225	up
T3_negative	MW0194158	(2R,6S,7R,9R,12S,16S)-6-hydroxy-15-[(1S)-1-[5-(hydroxymethyl)-4-methyl-6-oxo-2,3-dihydropyran-2-yl]ethyl]-2,16-dimethyl-8-oxapentacyclo[9.7.0.02,7.07,9.012,16]octadec-4-en-3-one	Others	Others	C28H38O6	469.263	470.267	6.2791	[M-H]-	3.00726	2	0.9005	rp	-	16745397	-	-	-	63394.3	61502.4	62983.7	45112.4	38161.1	31670.4	62729.8	59858.1	61803.1	-	1.21418	0.0225686	0.611793	-0.708885	down
T3_negative	MW0103681	Uridine-5'-diphosphogalactose disodium salt	Nucleotide and Its metabolites	Nucleotide and Its metabolites	C15H24N2O17P2	565.047	566.055	0.8123	[M-H]-	1.1083	2	0.9005	rp	-	23724458	HMDB0000302	-	C00052	732310	715968	818605	297965	148110	237391	1.22882e+06	1.22851e+06	1.22807e+06	ko00052,ko00520,ko01100,ko01250	1.23938	0.000931839	0.3015	-1.72977	down
T3_negative	MW0012341	13-Methylmyristic acid	FA	FFA	C15H30O2	241.218	242.225	8.3298	[M-H]-	3.20307	2	0.8957	rp	-	151014	HMDB0061707	-	-	6445.88	6971.92	5484.79	10529.7	11269.5	10005.5	10033.8	10379.2	10149.4	-	1.25563	0.00184124	1.68256	0.750657	up
T3_negative	MW0153271	LPE(0:0/18:2)	GP	PE	C23H44NO7P	476.279	477.286	7.0481	[M-H]-	0.151055	2	0.8949	rp	-	53480926	HMDB0011477	-	C00350	1.71248e+06	1.27819e+06	1.7337e+06	4.60089e+06	4.47754e+06	4.87467e+06	4.01326e+06	3.90482e+06	3.78811e+06	ko00563,ko00564,ko01100,ko01110,ko04136,ko04138	1.28981	0.000118895	2.95343	1.56239	up
T3_negative	MW0159839	Cytarabine	Nucleotide and Its metabolites	Nucleotide and Its metabolites	C9H13N3O5	242.079	243.085	0.6794	[M-H]-	3.05329	2	0.8428	rp	-	596	HMDB0248553	-	-	465027	401056	456118	958537	1.01543e+06	1.00192e+06	890942	893218	890922	-	1.30213	3.69259e-05	2.2507	1.17038	up
T3_negative	MW0155355	Phe-Thr-Lys-Lys	Amino acid and Its metabolites	Small Peptide	C25H42N6O6	521.314	522.317	7.2209	[M-H]-	6.8606	3	0.8952	rp	-	-	-	142047	-	18569.2	17464.6	17246.2	12384.4	10863.8	12496.7	15844.5	16301.5	16263.4	-	1.26983	0.00121583	0.670887	-0.575858	down
T3_negative	MW0105310	5-Hydroxy-2-oxo-4-ureido-2,5-dihydro-1H-imidazole-5-carboxylate	Organic acid and Its derivatives	Organic acid and Its derivatives	C5H6N4O5	201.026	202.034	0.5637	[M-H]-	1.8	3	0.8739	rp	-	443736	HMDB0301917	-	C12248	242158	207386	185619	521411	340907	407005	273341	275439	274614	ko00230,ko01100	1.21016	0.0465373	1.99842	0.998861	up
T3_negative	MW0109418	Propionic acid	Organic acid and Its derivatives	Organic acid and Its derivatives	C3H6O2	73.0297	74.0368	1.3397	[M-H]-	0.55	3	0.8623	rp	-	1032	HMDB0000237	3215	C00163	75925.6	82783.8	77588.7	179626	214532	174309	112802	112728	112275	ko00640,ko00760,ko01100	1.29422	0.0111155	2.40572	1.26647	up
T3_negative	MW0151054	His-Phe-Tyr-Asp	Amino acid and Its metabolites	Small Peptide	C28H32N6O8	579.221	580.228	7.3246	[M-H]-	0.155601	3	0.8605	rp	-	-	-	153461	-	4668.1	5164.3	5684.34	23399	15523.8	20940.3	11509.2	11532.9	11471.3	-	1.28796	0.0224393	3.85797	1.94784	up
T3_negative	MW0156654	Ser-Arg-Tyr-Glu	Amino acid and Its metabolites	Small Peptide	C23H35N7O9	552.241	553.25	2.5519	[M-H]-	4.87037	3	0.8583	rp	-	-	-	229462	-	2282.07	2525.58	1412.69	8950.5	6930.17	7493.07	3565.57	3562.5	3549.76	-	1.26147	0.00308139	3.75763	1.90982	up
T3_negative	MW0011825	1-(sn-Glycero-3-phospho)-1D-myo-inositol	GP	PA	C9H19O11P	333.059	334.067	0.7292	[M-H]-	1.81026	3	0.853	rp	-	45480545	HMDB0011649	-	C01225	1.17422e+06	1.32324e+06	1.30851e+06	830885	949752	1.11312e+06	1.91224e+06	1.90869e+06	1.90867e+06	-	1.09389	0.0443708	0.760321	-0.395319	down
T3_negative	MW0149379	Gal1-3[Fuc1-4]GlcNAc1-3Gal1-4GlcNAcSp	Carbohydrates and Its metabolites	Sugar derivatives	C36H61N5O25	962.375	963.366	2.8182	[M-H]-	15.7472	3	0.8507	rp	-	-	-	3664	-	1393.42	1722.71	216.79	16443.6	13463.2	13400.8	6191.84	6182.56	6258.54	-	1.19254	0.001703	12.9939	3.69976	up
T3_negative	MW0144017	8,12-Diethylbacteriochlorophyllide d	Heterocyclic compounds	Heterocyclic compounds	C34H36MgN4O4	587.243	588.259	1.5868	[M-H]-	15.1891	3	0.848	rp	-	124201680	-	-	C21432	87.01	582.83	267.58	14413.4	10557.7	9622.58	4697.45	4765.91	4772.67	ko00860	1.25947	0.015919	36.903	5.20567	up
T3_negative	MEDL02411	5-hydroxy-L-tryptophan	Amino acid and Its metabolites	Amino acid derivatives	C11H12N2O3	219.078	220.085	2.461	[M-H]-	0.525	3	0.8406	rp	-	439280	HMDB0000472	-	C00643	14.36	184.18	401.25	3564.17	4469.49	4709.01	1989.76	1948.66	2006.62	ko00380,ko01100	1.15324	0.00403417	21.2452	4.40907	up
T3_negative	MW0155108	Phe-Asn-Ile-Glu	Amino acid and Its metabolites	Small Peptide	C24H35N5O8	520.241	521.249	3.0649	[M-H]-	4.45171	3	0.8385	rp	-	-	-	140022	-	147.33	245.25	390.15	8607.79	6170.87	6769.92	2935.77	2940.54	2942.78	-	1.29263	0.0104934	27.53	4.78293	up
T3_negative	MW0158490	Tyr-His-Ser-Asp	Amino acid and Its metabolites	Small Peptide	C22H28N6O9	519.182	520.192	1.0359	[M-H]-	1.93657	3	0.8366	rp	-	-	-	258181	-	3660.4	2488.75	6050.41	32135.7	21371.6	26367.7	8058.75	7929.39	7092.06	-	1.26034	0.0117384	6.54737	2.71092	up
T3_negative	MW0121074	5-Acetylamino-6-formylamino-3-methyluracil	Heterocyclic compounds	Heterocyclic compounds	C8H10N4O4	285.086	226.07	2.4634	[M+CH3COO]-	3.88178	3	0.8334	rp	-	108214	HMDB0011105	-	C16365	18514.7	21099.9	19861.6	61852.9	59732.5	62440.8	40833.2	40674.6	40671.7	ko01100,ko01110	1.30903	3.36167e-06	3.09412	1.62953	up
T3_negative	MW0141603	(8r,9s,10r,13s,14s,17r)-10,13-Dimethyl-7,8,9,10,11,12,13,14,15,16-decahydro-3'h-spiro[cyclopenta[a]phenanthrene-17,2'-furan]-3,5'(4'h,6h)-dione	Aldehyde,Ketones,Esters	Ketones	C22H28O3	339.2	340.204	8.9585	[M-H]-	8.3507	3	0.8273	rp	-	248591	-	-	-	15887.6	23590.7	29748.8	41293	60427.2	67764.1	36303.5	42001.2	40868.9	-	1.16208	0.033139	2.44824	1.29174	up
T3_negative	MW0155229	Phe-Ile-His-Arg	Amino acid and Its metabolites	Small Peptide	C27H41N9O5	570.326	571.323	3.2114	[M-H]-	20.2412	3	0.8259	rp	-	-	-	138413	-	74.79	263.43	103.48	5980.29	3505.87	3512.32	1151.91	1206.39	1122.3	-	1.27685	0.0360337	29.4283	4.87913	up
T3_negative	MW0161475	Benzoyl-beta-D-glucoside	Benzene and substituted derivatives	Benzene and substituted derivatives	C13H16O7	300.106	284.09	2.2537	[M+NH4-2H]-	6.5	3	0.8256	rp	-	12314096	-	-	-	11496.7	12786.6	9487.71	22473	20685.2	22193	13401.5	13246.3	13136.6	-	1.26646	0.00188263	1.93512	0.952426	up
T3_negative	MW0140553	indole-3-glycol aldehyde	Heterocyclic compounds	Indole and Its derivatives	C10H9NO2	215.083	175.063	2.9634	[M-H+CH3CN]-	3.375	3	0.8161	rp	-	439951	HMDB0304393	-	C03230	3199.14	3559.37	2628.67	4517.46	4198.85	4582.36	2076.32	2155.12	1922.19	ko00380,ko01100	1.16421	0.0261144	1.41668	0.502518	up
T3_negative	MW0141032	1-(5-Phosphoribosyl)imidazole-4-acetate	Aldehyde,Ketones,Esters	Esters	C10H15N2O9P	337.044	338.051	1.2872	[M-H]-	3.86209	3	0.8151	rp	-	440341	HMDB0006032	-	C04437	5013.13	5704.39	7029	9758.6	10587.5	9511.89	7848.35	7888.64	7905.7	ko00340	1.22065	0.00844892	1.68247	0.75058	up
T3_negative	MW0159869	Amylotetraose	Carbohydrates and Its metabolites	Sugars	C24H42O21	701.191	666.222	0.8497	[M+Cl]-	0.0570458	3	0.813	rp	-	870	HMDB0252767	-	-	103718	83904	25242	687349	629469	573301	279998	274507	265969	-	1.2272	0.000290149	8.87947	3.15047	up
T3_negative	MW0151377	Ile-Asp-Tyr-Lys	Amino acid and Its metabolites	Small Peptide	C25H39N5O8	536.261	537.28	7.2209	[M-H]-	24.1338	3	0.8068	rp	-	-	-	160667	-	22960.9	25698.2	21482.3	12774.2	15603.4	17023.8	16769.1	16904	16802	-	1.19572	0.0093458	0.647283	-0.627532	down
T3_negative	MW0164690	Indole-3-acetyl-beta-6-D-glucose	Heterocyclic compounds	Indole and Its derivatives	C16H19NO7	358.092	337.116	2.5925	[M+Na-2H]-	2.125	3	0.8055	rp	-	53764549	-	-	-	15169.6	16962.8	17804.5	46489.4	54069.6	49681.8	25243.4	25272.8	25449	-	1.30245	0.00184999	3.00861	1.5891	up
T3_negative	MW0161302	N-Cinnamoyl Serotonin	Alcohol and amines	Amines	C19H18N2O2	305.13	306.137	5.3275	[M-H]-	1.175	3	0.805	rp	-	9995324	-	-	-	162.15	671.25	200.81	2817.13	2937.22	2148.97	1366.36	1352.02	1426.4	-	1.21542	0.00255091	7.64189	2.93393	up
T3_negative	MW0161530	[(3R,4S,5S,6R)-2,4,5-trihydroxy-6-(hydroxymethyl)oxan-3-yl] (E)-3-(4-hydroxyphenyl)prop-2-enoate	Others	Others	C15H18O8	361.071	326.1	2.4634	[M+Cl]-	4.575	3	0.8049	rp	-	14034265	-	-	-	9736.89	10757.1	10037.7	31061.4	30190.9	29690.2	20754.4	20881.8	20658.9	-	1.30985	4.79854e-06	2.97863	1.57465	up
T3_negative	MW0146130	Asp-His-Phe-Asp	Amino acid and Its metabolites	Small Peptide	C23H28N6O9	531.176	532.192	3.0294	[M-H]-	15.2456	3	0.8036	rp	-	-	-	121962	-	16037.4	18101.2	12993.4	145320	126559	127978	59458.7	59296	59418.3	-	1.30591	0.00161318	8.48377	3.08471	up
T3_negative	MW0159270	Validamine 7-phosphate	Organic acid and Its derivatives	Organic acid and Its derivatives	C7H16NO7P	513.122	257.066	0.9068	[2M-H]-	8.13529	3	0.7945	rp	-	118796935	-	-	C21216	158202	225266	184314	40338.6	52038.6	39981.5	146457	146596	144028	ko01100,ko01110	1.29154	0.0146936	0.233115	-2.10088	down
T3_negative	MW0142547	cis-2-Oxohept-3-enedioic acid	Organic acid and Its derivatives	Organic acid and Its derivatives	C7H8O5	207.009	172.037	9.6214	[M+Cl]-	6.325	3	0.794	rp	-	5280566	-	-	C03063	31563.5	34231.8	20201.2	7895.57	9915.23	13319	18231	16437.5	19189.2	ko00350,ko01100	1.20101	0.0383651	0.361989	-1.46598	down
T3_negative	MW0103960	[(E)-4-Methyl-5-Oxidanyl-Pent-3-Enyl]-Phosphonooxy-Phosphinic Acid	Organic acid and Its derivatives	Organic acid and Its derivatives	C6H14O7P2	259.005	260.022	1.8334	[M-H]-	23.8653	3	0.7926	rp	-	9901847	-	64798	-	17944.5	19112.1	18727.3	37604.4	37761.7	33383.7	22982.2	22765.8	23204.1	-	1.30002	0.00456527	1.94948	0.963091	up
T3_negative	MW0128882	[7-hydroxy-2-(3-hydroxyphenyl)-4-[3,5,7-trihydroxy-2-(3-hydroxyphenyl)-3,4-dihydro-2H-1-benzopyran-8-yl]-3,4-dihydro-2H-1-benzopyran-3-yl]oxidanesulfonic acid	Organic acid and Its derivatives	Organic acid and Its derivatives	C30H26O12S	609.111	610.115	3.1584	[M-H]-	3.56191	3	0.7915	rp	-	131838804	HMDB0135138	-	-	5693.4	6684.3	5648.95	15791.4	11845.8	12379.1	7126.25	6917.3	6954.46	-	1.26989	0.0210904	2.21984	1.15046	up
T3_negative	MW0145271	Arg-Asn-Gln-Glu	Amino acid and Its metabolites	Small Peptide	C20H35N9O9	544.244	545.256	2.3535	[M-H]-	8.46277	3	0.7876	rp	-	-	-	220142	-	569.25	439.46	149.3	3488.47	4448.44	4973.38	697.25	638.15	725.43	-	1.24477	0.00808597	11.1487	3.4788	up
T3_negative	MW0013121	2,3-dinor Fluprostenol	Hormones and hormone related compounds	Hormones and hormone related compounds	C21H25F3O6	429.134	430.16	2.5039	[M-H]-	0.0152421	3	0.7875	rp	-	71684407	-	45699	-	5821.87	7225.55	5446.54	2218.46	1146.41	3483.64	3524.72	3499.96	3648.72	-	1.11282	0.0121731	0.370311	-1.43319	down
T3_negative	MW0194316	L-Asparagine, N-[2-(acetylamino)-2-deoxy-beta-D-glucopyranosyl]-	Amino acid and Its metabolites	Amino acid derivatives	C12H21N3O8	316.116	335.133	0.6777	[M-H2O-H]-	3.50297	3	0.7734	rp	-	91746260	HMDB0000489	-	-	373188	341571	436607	606370	697815	629382	739972	742971	739930	-	1.24865	0.00265026	1.67937	0.747918	up
T3_negative	MW0156920	Ser-Thr-Asn-Glu	Amino acid and Its metabolites	Small Peptide	C16H27N5O10	448.175	449.176	2.7693	[M-H]-	13.8749	3	0.7729	rp	-	-	-	230102	-	5336.53	6093.53	3564.57	13234.1	12423.6	10759.8	5935.41	5992.87	5993.77	-	1.2264	0.00240579	2.4287	1.28019	up
T3_negative	MW0158878	Val-Ala-Phe-Asp	Amino acid and Its metabolites	Small Peptide	C21H30N4O7	449.204	450.211	3.583	[M-H]-	0.0573164	3	0.7726	rp	-	-	-	239561	-	5456.72	8461.04	3666.81	29469.9	17671	21198.1	11294.8	11191.9	11243.4	-	1.21644	0.0272096	3.8863	1.9584	up
T3_negative	MW0159042	Val-Ile-Leu-Asp	Amino acid and Its metabolites	Small Peptide	C21H38N4O7	457.266	458.274	4.8923	[M-H]-	0.606993	3	0.7706	rp	-	-	-	242461	-	11384.2	18737.5	11650.9	42300.2	28808.1	31321.2	20924.2	20921	21049.4	-	1.20305	0.0212104	2.45207	1.294	up
T3_negative	MW0155404	Phe-Val-Gln-Asp	Amino acid and Its metabolites	Small Peptide	C23H33N5O8	566.246	507.233	3.1938	[M+CH3COO]-	2.79672	3	0.7703	rp	-	-	-	142541	-	687.3	655.81	231.81	9864.21	7652.6	5875.34	3361.58	3313.49	3310.8	-	1.26467	0.0227781	14.8529	3.89267	up
T3_negative	MW0143954	[(4S,6S,7R,8R)-7,13-dihydroxy-12-methyl-10,11-dioxo-2,5-diazatetracyclo[7.4.0.02,7.04,6]trideca-1(9),12-dien-8-yl]methyl carbamate	Heterocyclic compounds	Heterocyclic compounds	C14H15N3O6	320.091	321.096	2.2391	[M-H]-	8.50848	3	0.7678	rp	-	119057489	-	-	C21164	2238.6	2687.85	1112.82	9275.18	8057.7	7752.11	4012.5	4148.66	3962.42	-	1.23123	0.000653952	4.15365	2.05438	up
T3_negative	MW0150207	Glu-Val-Gln-Glu	Amino acid and Its metabolites	Small Peptide	C20H33N5O10	502.214	503.223	2.2214	[M-H]-	3.05643	3	0.7675	rp	-	-	-	134543	-	84.12	16.64	31.32	3313.86	2552.7	2244.94	1044.24	1035.8	980.73	-	1.28043	0.0136814	61.4135	5.94048	up
T3_negative	MW0144582	Ala-Gly-Leu-Val-Ser	Amino acid and Its metabolites	Small Peptide	C19H35N5O7	444.254	445.254	4.3039	[M-H]-	16.1348	3	0.7672	rp	-	-	-	264588	-	5166.79	12279.3	9120.16	74691.5	52284.8	52334.3	27608.5	27020.5	27076.9	-	1.26196	0.0154249	6.74955	2.75479	up
T3_negative	MW0120565	4-Hydroxy Triamterene	Benzene and substituted derivatives	Benzene and substituted derivatives	C12H11N7O	328.114	269.103	2.4335	[M+CH3COO]-	6.21997	3	0.767	rp	-	71046	HMDB0246440	-	-	5635.42	5519.28	4847.05	4581.08	4236.39	4032.68	4000.59	3996.68	4061.49	-	1.14947	0.0297735	0.803047	-0.316444	down
T3_negative	FDATN00003	Nintedanib	Others	Medicine	C31H33N5O4	538.264	539.253	7.2381	[M-H]-	22.8671	3	0.7648	rp	-	135423438	HMDB0255615	-	-	5537.3	4912.1	5662.6	4277.66	3300.69	4123.94	4932.01	5003.17	5070.28	-	1.13592	0.0207166	0.726309	-0.461345	down
T3_negative	MW0152942	Lys-Gln-Phe-Glu	Amino acid and Its metabolites	Small Peptide	C25H38N6O8	549.267	550.275	3.7599	[M-H]-	0.516095	3	0.7642	rp	-	-	-	172762	-	855.34	1455.67	2106.45	14282.7	9773.16	7912.3	4844.49	4666.21	4741.61	-	1.25326	0.0358889	7.23677	2.85535	up
T3_negative	MW0157415	Tetracenomycin B1	Benzene and substituted derivatives	Benzene and substituted derivatives	C20H14O6	349.075	350.079	1.4678	[M-H]-	9.26489	3	0.7625	rp	-	443789	-	-	-	233.54	1579.42	995.98	9424.98	9364.1	7693.26	4420.28	4427.8	4313.18	-	1.19072	0.000630718	9.42788	3.23693	up
T3_negative	MW0002151	2,3-Dihydro-2,3-dihydroxy-4-(4-hydroxyphenyl)-1H-phenalen-1-one	Benzene and substituted derivatives	Benzene and substituted derivatives	C19H14O4	305.082	306.089	5.992	[M-H]-	1.5611	3	0.7624	rp	-	73121825	HMDB0032848	-	-	12823.7	12931.7	10555	7252.56	9440.47	7804.17	12062	11492.9	11843.4	-	1.16769	0.0188117	0.674661	-0.567766	down
T3_negative	MW0004918	2-Dodecylbenzenesulfonic acid	Benzene and substituted derivatives	Benzene and substituted derivatives	C18H30O3S	326.188	326.192	8.2261	[M-]-	12.6407	3	0.7583	rp	-	25457	HMDB0031031	-	-	33023.3	75797.7	55578.8	91305.2	103075	114125	56560.8	59397.7	57079.5	-	1.05631	0.0404228	1.87656	0.908087	up
T3_negative	MW0150099	Glu-Phe-Asp-Glu	Amino acid and Its metabolites	Small Peptide	C23H30N4O11	597.207	538.191	2.4335	[M+CH3COO]-	5.93524	3	0.758	rp	-	-	-	129123	-	17304.5	16673.8	13199.7	11187.1	8611.99	9944.77	10263	10105.1	10094.2	-	1.17371	0.0257118	0.63046	-0.665524	down
T3_negative	MW0007849	Morpholin-4-ium (4-methoxyphenyl)morpholin-4-ylphosphinodithioate	Benzene and substituted derivatives	Phenolics	C15H25N2O3PS2	288.027	376.104	1.6472	[M-H]-	5.00961	3	0.7569	rp	-	53393943	-	64818	-	1856.23	3674.92	2169.55	31680.5	30182.2	29895.9	15367.8	15459.6	15456.1	-	1.29473	3.74581e-06	11.9156	3.57478	up
T3_negative	MW0153949	3-Monobromobisphenol A	Benzene and substituted derivatives	Benzene and substituted derivatives	C15H15BrO2	611.041	306.026	0.5637	[2M-H]-	4.46449	3	0.754	rp	-	656688	-	-	-	145738	126390	106040	440320	351212	392741	230134	229558	230750	-	1.28838	0.00340731	3.13161	1.64691	up
T3_negative	MW0053732	2,3-Dihydroxypropyl 2-[(octadec-9-enoyl)amino]ethyl hydrogen phosphate	Aldehyde,Ketones,Esters	Esters	C23H46NO7P	478.294	479.301	7.7798	[M-H]-	3.87223	3	0.7513	rp	-	53393982	-	45335	-	7569.25	10335.7	19385.4	84907.6	74154.8	67526.4	45896.6	45888.5	42755.9	-	1.25596	0.000888612	6.07634	2.6032	up
T3_negative	MW0153739	Met-Abu-OH	Amino acid and Its metabolites	Small Peptide	C14H18N2O6S	401.099	342.089	3.1761	[M+CH3COO]-	2.24504	3	0.7487	rp	-	-	-	65293	-	6658.04	6138.29	4865.37	20430.8	18949.5	22174.7	10006.6	9850.65	10000.4	-	1.29486	0.000629346	3.48522	1.80125	up
T3_negative	MW0124222	Garcinolic acid	Organic acid and Its derivatives	Organic acid and Its derivatives	C38H46O9	645.322	646.314	2.1328	[M-H]-	21.7601	3	0.7485	rp	-	6857794	-	43950	-	398.54	206.2	220.99	16040.5	9107.36	11015.7	3196.36	3252.62	3424.06	-	1.30001	0.0293654	43.7959	5.45272	up
T3_negative	MW0155755	Mikamycin B	Amino acid and Its metabolites	Amino acids	C45H54N8O10	865.397	866.396	2.5217	[M-H]-	10.321	3	0.7446	rp	-	14974	HMDB0256777	-	C11615	3763.18	5373.98	4012.43	15207.7	9773.3	10361.1	6019.25	6004.81	6040.21	-	1.23616	0.0411869	2.68769	1.42637	up
T3_negative	MW0141190	1,7-Diphospho-1-epi-valienol	Organic acid and Its derivatives	Organic acid and Its derivatives	C7H14O11P2	370.967	336.001	1.3625	[M+Cl]-	10.7567	3	0.7428	rp	-	50994408	-	-	C21206	7319.35	8612.39	7221.3	14932.3	17059	16177.6	12718.5	12599.6	12602.4	ko01100,ko01110	1.28886	0.000638751	2.08046	1.0569	up
T3_negative	MW0157203	Stealthin C	Benzene and substituted derivatives	Benzene and substituted derivatives	C18H13NO4	366.103	307.084	2.4335	[M+CH3COO]-	9.34978	3	0.7418	rp	-	443803	-	-	C12392	74436	73772.7	66267.3	61469.2	56117.1	57211.5	59916.8	59841.1	59874.3	-	1.19206	0.0186307	0.814999	-0.295129	down
T3_negative	MW0149739	Gln-Leu-Glu-Lys	Amino acid and Its metabolites	Small Peptide	C22H40N6O8	575.311	516.291	6.2791	[M+CH3COO]-	9.26661	3	0.7407	rp	-	-	-	211147	-	58718.9	64986.7	69710.8	45949.1	30985	33360.8	71545.8	68773.6	71340.6	-	1.19128	0.0107784	0.570246	-0.810343	down
T3_negative	MW0155126	Phe-Asp-Glu-Phe-Leu	Amino acid and Its metabolites	Small Peptide	C33H43N5O10	668.289	669.301	2.3447	[M-H]-	7.99229	3	0.7381	rp	-	-	-	264783	-	1159.2	647.9	420.84	7037.69	5764.74	5418.44	2723.94	2766.29	2729.29	-	1.26416	0.00310394	8.17835	3.03181	up
T3_negative	MW0149632	Gln-Asn-Glu-Glu	Amino acid and Its metabolites	Small Peptide	C19H30N6O11	553.154	518.197	0.8467	[M+Cl]-	19.7896	3	0.7381	rp	-	-	-	211942	-	431425	602205	1.08328e+06	1.76464e+06	1.634e+06	1.42664e+06	1.20156e+06	1.21801e+06	1.14528e+06	-	1.11624	0.0264958	2.2794	1.18865	up
T3_negative	MW0127618	(-)-Gallocatechin	Flavonoids	Flavonoid	C15H14O7	306.077	306.074	0.7866	[M-]-	7.06298	3	0.7348	rp	-	9882981	HMDB0302404	-	-	6.1078e+06	6.63739e+06	5.52528e+06	9.62069e+06	9.17429e+06	1.11227e+07	6721326	6.72025e+06	6.68433e+06	-	1.25144	0.00945185	1.63749	0.711483	up
T3_negative	MW0111911	{[(2R,3S,4R,5R)-3,4-dihydroxy-5-[(formamidomethanimidoyl)amino]oxolan-2-yl]oxy}phosphonic acid	Others	Others	C6H12N3O8P	284.027	285.036	1.9568	[M-H]-	10.2374	3	0.732	rp	-	22833657	HMDB0006211	-	-	9197.08	10514.2	8078.19	15485.2	15786.3	15455.6	10272.7	10393.1	10468.7	-	1.2596	0.0108685	1.68147	0.749721	up
T3_negative	MW0106218	Cyclocreatine	Nucleotide and Its metabolites	Nucleotide and Its metabolites	C5H9N3O2	142.066	143.07	2.4573	[M-H]-	10.5903	3	0.7311	rp	-	2896	HMDB0250642	-	-	964.59	601.16	710.33	4173.45	5090.24	5217.94	2739.3	2777.95	2776.91	-	1.29386	0.00339651	6.36253	2.6696	up
T3_negative	MW0013615	1-octadecanoyl-2-(9Z-octadecenoyl)-sn-glycero-3-phosphoserine	GP	PC	C42H80NO10P	788.537	789.552	7.2209	[M-H]-	10.1326	3	0.726	rp	-	9547087	HMDB0010163	-	C00157	2940.26	3158.92	2127.1	835.46	982.04	1072.55	2335.58	2508.87	2518.05	ko00564,ko00590,ko00592,ko01100,ko01110	1.26595	0.0252663	0.351319	-1.50915	down
T3_negative	MW0109768	Starch acetate	Carbohydrates and Its metabolites	Sugar derivatives	C12H18O9	305.073	306.095	2.46	[M-H]-	19.6528	3	0.726	rp	-	19958317	HMDB0029891	-	-	1097.23	1216.54	521.85	5584.42	4848.32	5850.85	3308.47	3272.52	3378.29	-	1.25681	0.000456715	5.74251	2.52168	up
T3_negative	MW0103419	L-Thioinosine	Nucleotide and Its metabolites	Nucleotide and Its metabolites	C10H12N4O4S	343.069	284.058	2.2329	[M+CH3COO]-	7.20089	3	0.7253	rp	-	3005838	HMDB0060791	-	-	14269.7	16000.8	19411.1	46066.1	39819.1	44370.8	35718.2	33873.8	35910.2	-	1.28605	0.000455665	2.62182	1.39057	up
T3_negative	MW0125311	Pyrazolopyridine analog	Alcohol and amines	Amines	C17H19Cl2N7O	406.094	407.103	1.273	[M-H]-	1.22969	3	0.7246	rp	-	10223146	HMDB0253740	-	-	12122.9	14320.6	12325.5	1740.13	4830.97	7869.56	9194.92	9279.99	9112.15	-	1.04004	0.0311031	0.372479	-1.42477	down
T3_negative	MW0107353	His-Thr	Amino acid and Its metabolites	Small Peptide	C10H16N4O4	255.107	256.117	0.6282	[M-H]-	5.44178	3	0.7201	rp	-	10131299	HMDB0028895	-	-	68168.9	53779.9	61969.4	122271	109172	93132.4	80497.6	78722.8	80372.3	-	1.23064	0.0164792	1.76478	0.819488	up
T3_negative	MW0110132	Trp-Pro	Amino acid and Its metabolites	Small Peptide	C16H19N3O3	300.135	301.143	3.1051	[M-H]-	1.43018	3	0.7178	rp	-	11863652	HMDB0029091	-	-	605.98	752.16	335.46	2778.54	2629.33	2326.34	1207.51	1269.89	1230.28	-	1.25148	0.000382817	4.56673	2.19116	up
T3_negative	MW0149250	Fluprostenol methyl amide	Benzene and substituted derivatives	Benzene and substituted derivatives	C24H32F3NO5	506.187	471.223	1.9568	[M+Cl]-	12.7656	3	0.7108	rp	-	52204059	-	45260	-	2230.13	2870.55	1892.03	14780.5	11942.4	10999	3855.69	3837.22	3836.9	-	1.29231	0.00877809	5.39445	2.43148	up
T3_negative	MW0158449	Tyr-Glu-Arg-Arg	Amino acid and Its metabolites	Small Peptide	C26H42N10O8	621.304	622.319	2.2683	[M-H]-	13.8268	3	0.7107	rp	-	-	-	256973	-	654.84	2212.27	1762.9	16749.1	10295.2	11057.6	5112.35	5182.84	5148.04	-	1.23312	0.0268211	8.22934	3.04078	up
T3_negative	MEDL02771	Dihydroxyacetone phosphate	Organic acid and Its derivatives	Organic acid and Its derivatives	C3H7O6P	214.988	169.998	1.3797	[M+HCOO]-	19.7286	3	0.7095	rp	-	668	HMDB0001473	6262	C00111	34911.9	38372.2	36182	40674.2	41666.3	40341.8	43759.6	43684.7	43449	ko00010,ko00040,ko00051,ko00052,ko00561,ko00562,ko00564,ko00630,ko00640,ko00680,ko00760,ko01100,ko01110,ko01200,ko01230	1.16762	0.0350876	1.12073	0.164444	up
T3_negative	MW0140468	(R)-NADH-Hydrate	Nucleotide and Its metabolites	Nucleotide and Its metabolites	C21H31N7O15P2	682.128	683.135	1.3223	[M-H]-	2.60253	3	0.7064	rp	-	56927861	-	-	C20482	156234	157360	160439	92604.7	68911.3	81254.4	82062.7	81058.8	82068.5	-	1.26941	0.00635924	0.512138	-0.965394	down
T3_negative	MW0109526	Ramiprilat	Amino acid and Its metabolites	Amino acid derivatives	C21H28N2O5	387.188	388.2	3.0697	[M-H]-	13.0204	3	0.705	rp	-	5464096	HMDB0060579	-	-	3972.2	4099.58	3340.29	12991.4	13216.2	10375.9	6269.08	6267.88	6288.83	-	1.29221	0.00828006	3.20568	1.68063	up
T3_negative	MW0105932	Asp-Ser	Amino acid and Its metabolites	Small Peptide	C7H12N2O6	327.036	220.07	1.4625	[M-H]-	12.5097	3	0.7019	rp	-	9964514	HMDB0028762	-	-	5554.68	6654.56	3947.33	1044.32	818.35	1087.52	2180.01	2394.17	2248.68	-	1.28309	0.0292669	0.1826	-2.45324	down
T3_negative	MW0130796	2-hydroxy-3-(2,3,4-trimethoxyphenyl)propanoic acid	Organic acid and Its derivatives	Organic acid and Its derivatives	C12H16O6	255.089	256.095	3.7068	[M-H]-	7.85234	3	0.7019	rp	-	83441857	HMDB0142082	-	-	2017.56	1055.41	888.33	2473.01	3221.72	3281.54	2114.36	2068.65	2052.74	-	1.12037	0.0218493	2.26599	1.18014	up
T3_negative	MW0141794	1-NBD-decanoyl-2-decanoyl-sn-Glycerol	Others	Others	C29H46N4O8	577.334	578.332	6.7519	[M-H]-	14.7179	3	0.6996	rp	-	-	-	62997	-	2353.13	2588.89	2809.4	17298.2	9847.79	14025.2	5471.27	5638.08	5723.34	-	1.2862	0.0350519	5.31144	2.4091	up
T3_negative	MW0146349	Aspartylasparagine	Amino acid and Its metabolites	Small Peptide	C8H13N3O6	246.075	247.08	1.9568	[M-H]-	3.44283	3	0.6978	rp	-	18218190	HMDB0028748	-	-	75230.9	77462.6	68546.2	131765	127432	125181	90239.9	90150.6	89903.2	-	1.29883	0.000150688	1.73738	0.796913	up
T3_negative	MW0142888	3-dehydro-D-glucose-6-phosphate	Organic acid and Its derivatives	Organic acid and Its derivatives	C6H11O9P	238.994	258.014	0.615	[M-H2O-H]-	5.675	3	0.6975	rp	-	71668264	-	-	C20668	305080	318983	321149	154684	153455	147027	219017	219014	218993	ko01100,ko01110	1.30972	0.000126946	0.481549	-1.05425	down
T3_negative	MW0150741	heme O	Organic acid and Its derivatives	Phosphoric acids	C49H58FeN4O5	837.384	838.376	3.2444	[M-H]-	18.0763	3	0.6947	rp	-	15719509	HMDB0001162	-	-	157.13	210.48	204.73	7016.29	3968.19	4639.8	1431.72	1576.99	1677.19	-	1.30385	0.032289	27.2989	4.77077	up
T3_negative	MW0053576	(1R,2R,5R,8R,9S,10R)-11-methyl-6-methylidene-16-oxo-15-oxapentacyclo[9.3.2.15,8.01,10.02,8]heptadecane-9-carboxylic acid	Heterocyclic compounds	Heterocyclic compounds	C19H24O4	315.168	316.168	2.0452	[M-H]-	14.4741	3	0.6917	rp	-	443456	-	-	-	185.37	496.31	282.96	4051.17	2679.53	2897.7	970.17	945.59	937.78	-	1.26938	0.0174303	9.98134	3.31923	up
T3_negative	MW0155283	Phe-Lys-Val-Glu	Amino acid and Its metabolites	Small Peptide	C25H39N5O7	520.262	521.285	4.8923	[M-H]-	22.4707	3	0.6883	rp	-	-	-	139022	-	4022.28	10283.2	5666.05	20159.3	16633.5	15736.8	20348.1	29127.8	27656.5	-	1.1512	0.0117173	2.63023	1.39519	up
T3_negative	MW0159029	Val-His-Phe-Glu	Amino acid and Its metabolites	Small Peptide	C25H34N6O7	529.232	530.249	2.4661	[M-H]-	18.7716	3	0.6858	rp	-	-	-	241962	-	939.11	1036.96	398.18	29862.8	14019.7	20293.7	7510.5	7495.25	7495.14	-	1.28132	0.0462989	27.0301	4.75649	up
T3_negative	MW0155448	Phe-HoPhe-OH	Amino acid and Its metabolites	Small Peptide	C24H22N2O6	433.135	434.148	1.9568	[M-H]-	16.38	3	0.6842	rp	-	-	-	65355	-	4920.32	6025.02	4632.31	18678.7	17441	15146.8	6170.96	6090.34	6459.9	-	1.2937	0.0029943	3.29102	1.71854	up
T3_negative	MW0006590	Ciprofibrate	Benzene and substituted derivatives	Benzene and substituted derivatives	C13H14Cl2O3	323.005	288.032	1.648	[M+Cl]-	15.2541	3	0.6839	rp	-	2763	HMDB0250268	-	-	120.09	861.31	133.92	3346.98	7154.22	7736.43	3557.51	3323.69	3544.27	-	1.20117	0.0496222	16.3519	4.03139	up
T3_negative	MW0166724	4-(Isobutanoyl)sucrose	Aldehyde,Ketones,Esters	Esters	C16H28O12	449.108	412.158	2.4335	[M+K-2H]-	2.27118	3	0.6836	rp	-	122706080	-	-	-	7809.69	5879.12	6564.58	3014.45	2820.12	3863.24	6149.3	5964.77	6098.74	-	1.23988	0.0107291	0.478824	-1.06243	down
T3_negative	MW0148112	Cys-Trp	Amino acid and Its metabolites	Small Peptide	C14H17N3O3S	342.058	307.099	2.4335	[M+Cl]-	24.4505	3	0.6832	rp	-	20380880	HMDB0028786	-	-	6717.27	6726.81	6317.74	4738.61	4771.51	4958.65	5316.92	5399.89	5311.62	-	1.29523	0.00141983	0.732158	-0.449774	down
T3_negative	MW0013007	1-Stearoyl-2-oleoyl-sn-glycero-3-phospho-(1'-sn-glycerol)	GP	PG	C42H81O10P	775.548	776.557	7.2209	[M-H]-	0.888235	3	0.6825	rp	-	46891847	HMDB0010604	-	C00344	26280.2	24045.7	20519.4	11956	11306	10813.8	17485.2	17770.2	16204.4	ko00564,ko01100	1.28285	0.0153817	0.480988	-1.05593	down
T3_negative	MW0157700	Thr-Leu-Asp-Glu	Amino acid and Its metabolites	Small Peptide	C19H32N4O10	457.193	476.212	2.7742	[M-H2O-H]-	1.96184	3	0.6823	rp	-	-	-	235122	-	1116.9	157.36	517.62	6301.02	6155.76	5669.47	2481.23	2487.21	2521.08	-	1.20107	0.000198634	10.1158	3.33853	up
T3_negative	MW0056043	PA(20:4(5Z,8Z,11Z,14Z)/18:0)	GP	PA	C41H73O8P	723.498	724.504	8.2213	[M-H]-	4.04502	3	0.6806	rp	-	52929221	HMDB0115149	-	-	2815.17	3160.5	1978.25	5454.69	4823.88	6108.48	4968.33	5235.95	4846.83	-	1.20906	0.00535668	2.06025	1.04282	up
T3_negative	MW0007484	Leonurine	Benzene and substituted derivatives	Benzene and substituted derivatives	C14H21N3O5	621.279	311.148	3.0697	[2M-H]-	15.3083	3	0.6788	rp	-	161464	HMDB0254014	-	C16985	5105.51	5535.09	3622.2	46487.7	29370.8	30386.2	15877.6	15963.3	15648.7	-	1.28834	0.0300275	7.44908	2.89706	up
T3_negative	MW0148641	D-Mannonic acid	Organic acid and Its derivatives	Organic acid and Its derivatives	C6H12O7	391.107	196.058	0.5637	[2M-H]-	5.10607	3	0.6698	rp	-	3246006	HMDB0242119	-	C00514	300854	303736	251183	162256	148347	144633	172881	173739	173874	ko00040,ko01100	1.27949	0.0103774	0.531959	-0.910612	down
T3_negative	MW0104925	3,5-Dihydroxy-4-sulooxycyclohexene-1-carboxylic acid	Organic acid and Its derivatives	Organic acid and Its derivatives	C7H10O8S	252.997	254.01	1.1903	[M-H]-	15.5131	3	0.6668	rp	-	131836364	HMDB0130163	-	-	8442.78	8637.82	9394.23	17315.4	14034	15008.4	14510.9	14229.2	14443.9	-	1.2744	0.0147935	1.75101	0.808191	up
T3_negative	MW0143245	(4-Amino-2-methylpyrimidin-5-YL)methyl dihydrogen phosphate	Organic acid and Its derivatives	Organic acid and Its derivatives	C6H10N3O4P	264.039	219.041	1.4981	[M+HCOO]-	0.787589	3	0.6657	rp	-	216	-	-	C04556	3591.3	4240.07	3811.06	2953.67	2689.4	2838.13	3918.5	3894.72	3864.86	ko00730,ko01100,ko01240	1.23567	0.0196491	0.728473	-0.457052	down
T3_negative	MW0112114	2-deoxy-D-glucopyranose 6-phosphate	Organic acid and Its derivatives	Organic acid and Its derivatives	C6H13O8P	279.01	244.035	1.3625	[M+Cl]-	10.4736	3	0.6652	rp	-	440992	-	-	C06369	23164.7	27013.4	21113.9	48422.3	54521.4	53250.8	36076.3	35948.3	35440.8	-	1.28486	0.000378485	2.19091	1.13153	up
T3_negative	MW0130357	2,3,4,7,8,9,15,22,23-nonahydroxy-14-(hydroxymethyl)-13,25,32,35-tetraoxaoctacyclo[14.13.3.3(1),(2).0,(3).0,(1)(1).0(1),(2).0(1),(2).0(2),(3)(3)]pentatriaconta-1,3,5(30),6,8,10,19(24),20,22-nonaene-12,27,28,31,34-pentone	Others	Others	C32H22O19	769.105	710.076	1.6927	[M+CH3COO]-	20.8816	3	0.6587	rp	-	131838395	HMDB0134688	-	-	9597.27	10135.7	10519	1533.59	4160.44	4765.27	8404.81	8363.77	8405.66	-	1.12188	0.0165255	0.34574	-1.53224	down
T3_negative	MW0056950	1-Stearoyl-2-palmitoyl-sn-glycero-3-phosphocholine	GP	PC	C42H84NO8P	820.613	761.593	7.1684	[M+CH3COO]-	11.0905	3	0.6581	rp	-	18631368	HMDB0008034	-	C00157	6380.98	1498.78	7828.6	17626.4	17089.7	22587	27042.3	27300.3	26256.8	ko00564,ko00590,ko00592,ko01100,ko01110	1.0744	0.00604047	3.64793	1.86708	up
T3_negative	MW0149981	Glu-Gln-Phe-Arg	Amino acid and Its metabolites	Small Peptide	C25H38N8O8	637.284	578.281	3.1676	[M+CH3COO]-	19.1205	3	0.6566	rp	-	-	-	132774	-	14894.8	24135.8	9821.38	51413.2	41927.2	38087.6	23749.5	23537.3	23756	-	1.16287	0.00888267	2.69033	1.42779	up
T3_negative	MW0150187	Glu-Tyr-Asp-Lys	Amino acid and Its metabolites	Small Peptide	C24H35N5O10	534.232	553.238	2.1433	[M-H2O-H]-	22.6354	3	0.6559	rp	-	-	-	135128	-	318.23	789.63	430.31	16404.1	9989.95	13334.1	4863.95	4862.84	4825.49	-	1.2913	0.0200137	25.8282	4.69087	up
T3_negative	MW0142212	2-Amino-1,2-bis(p-chlorophenyl)ethanol	Heterocyclic compounds	Heterocyclic compounds	C14H13Cl2NO	280.036	281.037	2.5152	[M-H]-	14.1316	3	0.6555	rp	-	411181	-	-	-	73513.9	74666.3	66220	62091.6	58954.8	61166.3	62754.3	62132.1	62107.5	-	1.16999	0.0433917	0.849872	-0.234683	down
T3_negative	MW0003695	3,5-Dihydroxy-4-(sulfooxy)benzoic acid	Benzene and substituted derivatives	Benzene and substituted derivatives	C7H6O8S	294.975	249.978	1.3639	[M+HCOO]-	3.52644	3	0.6508	rp	-	69378631	HMDB0126639	-	-	20189.2	25017.9	22072.3	43075.5	45970.4	48433.2	31731.6	31957	31725.8	-	1.28706	0.000381744	2.0434	1.03097	up
T3_negative	MW0103587	Guanosine triphosphate adenosine	Nucleotide and Its metabolites	Nucleotide and Its metabolites	C20H27N10O17P3	771.077	772.077	1.6927	[M-H]-	9.54188	3	0.6341	rp	-	136948342	HMDB0001459	-	-	8498.13	10085.7	9133.76	1785.03	6333.21	3891.03	10006.5	10446.7	10418.6	-	1.04205	0.0451999	0.433272	-1.20666	down
T3_negative	MW0158714	Tyr-Met-OH	Amino acid and Its metabolites	Small Peptide	C20H22N2O7S	433.1	434.115	4.4677	[M-H]-	20.4844	3	0.6329	rp	-	-	-	65184	-	29454.4	27291.4	25170.2	20042.2	22183.9	23633	22910.9	22470.3	22761.5	-	1.12361	0.030971	0.803983	-0.314763	down
T3_negative	MW0155437	Phe4Cl-Tyr-OH	Amino acid and Its metabolites	Small Peptide	C23H19ClN2O7	469.094	470.088	1.2784	[M-H]-	23.2412	3	0.6328	rp	-	-	-	65176	-	6238.49	7437	6759.52	13338.2	15317.2	13283.7	5514.25	5209.42	5940.81	-	1.28724	0.00245241	2.05232	1.03725	up
T3_negative	MW0143009	3'-Keto-3'-deoxy-AMP	Heterocyclic compounds	Heterocyclic compounds	C10H12N5O7P	404.055	345.047	2.4335	[M+CH3COO]-	15.3948	3	0.6326	rp	-	441213	-	-	C07025	6002.64	5917.77	6354.79	4196.1	3693.73	3911.61	4685.76	4720	4650.58	ko01100,ko01110	1.28623	0.000414463	0.645763	-0.630924	down
T3_negative	MW0154236	N-Acetyl-leu-leu-tyr	Amino acid and Its metabolites	Amino acid derivatives	C23H35N3O6	448.246	449.253	6.5583	[M-H]-	4.11972	3	0.6283	rp	-	443128	-	-	C11330	2038.65	1370.75	1858.02	6160.21	9198	7186.42	4887.84	4884.63	4795.55	-	1.27716	0.0191244	4.28001	2.09762	up
T3_negative	MW0154597	Norbormide	Terpenoids	Sesquiterpenoids	C33H25N3O3	510.172	511.19	2.4424	[M-H]-	21.5951	3	0.6259	rp	-	13814	HMDB0257112	-	-	4883.62	4972.47	4716.58	10159.5	12474	13602.9	5685.76	5817.79	6166.89	-	1.28732	0.0186804	2.4866	1.31417	up
T3_negative	MW0143205	methyl {2-[(1R)-1-(3,4-dimethoxyphenyl)-4-oxocyclohex-2-en-1-yl]ethyl}methylcarbamate	Benzene and substituted derivatives	Benzene and substituted derivatives	C19H25NO5	406.181	347.173	5.4096	[M+CH3COO]-	18.6913	3	0.6219	rp	-	443747	-	-	C12262	2845.82	3225.75	2607.85	1990.77	2446.79	1657.51	3363.07	3213.03	3384.11	-	1.07506	0.0444638	0.702244	-0.509956	down
T3_negative	MW0127718	({6-[5,7-dihydroxy-2-(4-hydroxy-3-methoxyphenyl)-4-oxo-4H-chromen-6-yl]-3,4,5-trihydroxyoxan-2-yl}methoxy)sulfonic acid	Organic acid and Its derivatives	Organic acid and Its derivatives	C22H22O14S	541.056	542.073	1.6927	[M-H]-	21.5199	3	0.621	rp	-	131833720	HMDB0127362	-	-	7208.46	8162.25	8466.34	4098.05	4884.59	5643.87	11950.2	13521.6	11957.8	-	1.20901	0.00678993	0.613604	-0.70462	down
T3_negative	MW0129291	{4-[2,3-dioxo-3-(2,4,6-trihydroxy-3-methoxyphenyl)propyl]-2-methoxyphenyl}oxidanesulfonic acid	Organic acid and Its derivatives	Organic acid and Its derivatives	C17H16O11S	427.024	428.041	2.8047	[M-H]-	22.5403	3	0.6201	rp	-	131835084	HMDB0128787	-	-	3419.21	3356.49	3297.58	5680.16	5944.52	5362.68	6031.41	5922.49	6066.1	-	1.30169	0.00394304	1.68638	0.753928	up
T3_negative	MW0162139	[(2R,3S,4R,5R,6R)-5-acetamido-6-[(2R,3S,4R,5R,6R)-5-acetamido-4,6-dihydroxy-2-(hydroxymethyl)oxan-3-yl]oxy-3,4-dihydroxyoxan-2-yl]methyl dihydrogen phosphate	Others	Others	C16H29N2O14P	523.122	504.136	1.2872	[M+F]-	23.3974	3	0.6151	rp	-	25200795	-	-	-	13491.6	15525.9	14452.6	43013.9	48892	39961.1	18793	18911	18694.8	-	1.30032	0.00580667	3.03351	1.60099	up
T3_negative	MW0156585	Se-Adenosylselenomethionine	Amino acid and Its metabolites	Small Peptide	C15H23N6O5Se+	428.074	447.09	2.0363	[M-H2O-H]-	5.39629	3	0.6136	rp	-	49787001	HMDB0011118	-	C05691	206.58	323.56	371.24	3053.83	2248.42	2458.27	1749.68	1414.74	1687.55	-	1.29132	0.008804	8.6096	3.10595	up
T3_negative	MW0145360	Arg-Gly-Glu-Val-Leu	Amino acid and Its metabolites	Small Peptide	C24H44N8O8	571.31	572.328	4.3567	[M-H]-	21.0441	3	0.6133	rp	-	-	-	264174	-	414.56	10.74	1332.31	8012.57	6860.97	6263.63	2610.12	2297.07	2678.86	-	1.02718	0.000782557	12.0261	3.5881	up
T3_negative	MW0015784	Androstenedione	Hormones and hormone related compounds	Hormones and hormone related compounds	C19H26O2	307.158	286.193	7.9021	[M+Na-2H]-	24.7	3	0.5938	rp	-	6128	HMDB0000053	2795	C00280	5875.64	7547.22	7620.53	9844.9	8571.02	10206.9	4845.78	5135.24	5146.9	ko01100	1.10602	0.0295558	1.36018	0.443801	up
T3_negative	MW0055606	[(2R)-1-pentadecanoyloxy-3-phosphonooxypropan-2-yl] tetracosanoate	GP	PA	C42H83O8P	727.548	746.583	7.2209	[M-H2O-H]-	20.8666	3	0.5859	rp	-	131821882	HMDB0114831	-	-	3020.04	3538.46	4307.23	2154.43	2050.72	1814.81	2359.95	2283.26	1999.5	-	1.22109	0.0417719	0.554032	-0.851959	down
T3_negative	MW0130645	2-{3-[(6-carboxy-3,4,5-trihydroxyoxan-2-yl)oxy]-4-methoxyphenyl}-3-hydroxy-7-sulfino-3,4-dihydro-2H-1-benzopyran-5-olate	Benzene and substituted derivatives	Benzene and substituted derivatives	C22H24O13S	527.088	528.094	1.2345	[M-H]-	1.14051	3	0.5851	rp	-	131834270	HMDB0127896	-	-	13700.7	10413.5	10499.1	3329.79	4736.25	2941.7	6323.42	6128.05	6055.85	-	1.26196	0.00776368	0.318021	-1.6528	down
T3_negative	MW0151851	N(6)-(dimethylallyl)adenosine 5'-diphosphate	Nucleotide and Its metabolites	Nucleotide and Its metabolites	C15H23N5O10P2	494.096	495.092	2.3623	[M-H]-	23.6397	3	0.5825	rp	-	23724749	-	-	-	3861.91	3816.06	3234.08	192.63	127.05	896.09	733.57	707.03	784.9	-	1.18679	0.000639768	0.111415	-3.16598	down
T3_negative	MW0136216	6-{2-[6-(3,7-dimethylocta-2,6-dien-1-yl)-9-hydroxy-14,14-dimethyl-7-oxo-4,12,15-trioxatetracyclo[8.5.0.0(3),.0(1)(1),(1)(3)]]pentadeca-1(10),2,5,8-tetraen-5-yl]-5-hydroxyphenoxy}-3,4,5-trihydroxyoxane-2-carboxylic acid	Benzene and substituted derivatives	Benzene and substituted derivatives	C36H40O13	715.208	680.247	1.1314	[M+Cl]-	9.87781	3	0.5747	rp	-	-	-	-	-	58711	44880.1	75547.2	223216	178792	213679	96464.2	95806.4	96314.2	-	1.26992	0.00161522	3.43693	1.78112	up
T3_negative	MW0143116	3-Phosphoglycerol-glutathione	Organic acid and Its derivatives	Organic acid and Its derivatives	C13H24N3O11PS	442.065	461.087	2.5925	[M-H2O-H]-	5.64374	3	0.5731	rp	-	440166	-	-	C03928	1895.82	4103.92	3798.55	11136.4	13115.8	11438.8	6160.76	6295.77	6332.9	-	1.22871	0.000782331	3.64257	1.86496	up
T3_negative	MEDN1179	8-Epidermal glycoside	Others	Others	C16H26O7	330.167	330.168	3.2291	[M-]-	5.56004	3	0.5713	rp	-	13821	-	-	C11656	4461.15	5515.54	6469.39	60013	42694.9	42378.8	22037.1	21752.5	22024.1	-	1.29918	0.0171851	8.82196	3.1411	up
T3_negative	MW0117030	JWH 018 N-pentanoic acid metabolite	Organic acid and Its derivatives	Organic acid and Its derivatives	C24H21NO3	741.291	371.152	2.461	[2M-H]-	6.56099	3	0.5708	rp	-	53394451	-	64911	-	1052.45	2494.86	256.17	24109.2	16395	14505.2	6092.7	6296.64	5856.76	-	1.19617	0.0238731	14.4629	3.85429	up
T3_negative	MW0155158	Phe-Gln-Asp-Arg	Amino acid and Its metabolites	Small Peptide	C24H36N8O8	563.271	564.266	7.3246	[M-H]-	24.7469	3	0.5707	rp	-	-	-	140733	-	4284.63	4233.41	4287.91	2395.79	2949.21	2697.92	5309	5213.83	5220.24	-	1.27284	0.00934323	0.628061	-0.671023	down
T3_negative	MW0135502	6-[4-({[2-(3,4-dihydroxyphenyl)-5,7-dihydroxy-3,4-dihydro-2H-1-benzopyran-3-yl]oxy}carbonyl)-2,6-dihydroxyphenoxy]-3,4,5-trihydroxyoxane-2-carboxylic acid	Organic acid and Its derivatives	Organic acid and Its derivatives	C28H26O16	617.129	618.122	2.7959	[M-H]-	21.8209	3	0.5667	rp	-	131834541	HMDB0128191	-	-	2290.77	2260.1	2750.43	11275.7	12317	10282.2	7422.1	7020.28	7504.15	-	1.30414	0.00263251	4.63958	2.21399	up
T3_negative	MW0155691	Precorrin 6B	Heterocyclic compounds	Heterocyclic compounds	C44H56N4O16	895.351	896.369	3.9372	[M-H]-	12.2846	3	0.553	rp	-	5280916	-	-	C06319	506.84	183.74	299.32	7921.46	5900.05	6100.24	2194.19	2147.48	2321.78	ko00860,ko01100,ko01240	1.28707	0.00907547	20.125	4.33092	up
T3_negative	MW0165983	5-S-Cysteinyldopa	Aldehyde,Ketones,Esters	Esters	C12H16N2O6S	368.079	316.073	1.904	[M+Cl+NH3]-	24.1	3	0.5393	rp	-	90659112	-	-	-	14327.9	14927.7	15078.2	30813.1	31701.1	31219.9	20497.8	20395.6	20089.4	-	1.31043	1.31179e-06	2.11428	1.08017	up
T3_negative	MW0150157	Glu-Thr-Asp-Arg	Amino acid and Its metabolites	Small Peptide	C19H33N7O10	500.2	519.229	1.8864	[M-H2O-H]-	19.3296	3	0.5375	rp	-	-	-	133934	-	247.54	252.28	392.57	3486.94	2678.25	2285.36	685.61	708.36	720.99	-	1.29328	0.0177076	9.46957	3.2433	up
T3_negative	MW0134767	6-[5,7-Dihydroxy-2-(4-hydroxy-3-sulooxyphenyl)-4-oxochromen-3-yl]oxy-3,4,5-trihydroxyoxane-2-carboxylic acid	Organic acid and Its derivatives	Organic acid and Its derivatives	C21H18O16S	557.019	558.032	1.3223	[M-H]-	9.67842	3	0.5305	rp	-	74978248	HMDB0128154	-	-	72188.9	76972.4	90914.9	30578.8	22864.5	25992.6	51065.2	49993.5	51143.8	-	1.28623	0.00505422	0.330878	-1.59563	down
T3_negative	MW0128996	{2,6-dihydroxy-4-[({6,7,8,11,12,13,22,23-octahydroxy-3,16-dioxo-2,17,20-trioxatetracyclo[17.3.1.0,.0(1),(1)]tricosa-4,6,8,10,12,14-hexaen-21-yl}oxy)carbonyl]phenyl}oxidanesulfonic acid	Others	Others	C27H22O21S	713.034	714.037	1.3397	[M-H]-	4.44118	3	0.5177	rp	-	131837310	HMDB0133397	-	-	10374.4	11426	12813.1	24345.5	24093	25281.7	20162.5	20347.6	20760.7	-	1.29479	0.000508552	2.12981	1.09072	up
T3_negative	MW0011922	1,2-Dipentadecanoyl-sn-glycero-3-phosphocholine	GP	PC	C38H76NO8P	750.545	705.531	7.0001	[M+HCOO]-	23.214	3	0.5153	rp	-	24778654	HMDB0007934	-	C00157	18139.1	26581	20401.8	36893.4	36845	49538	25342.5	28563.9	31304.9	ko00564,ko00590,ko00592,ko01100,ko01110	1.18975	0.0248956	1.89301	0.92068	up
